# Supplementary material for: Large-scale characterization of cocaine addiction-like behaviors reveals that escalation of intake, aversion-resistant responding, and breaking-points are highly correlated measures of the same construct
Source: eLife. 2024 Nov 1;12:RP90422. doi: 10.7554/eLife.90422 (PMC11530236; doi:10.7554/eLife.90422)
Supplement: Figure 1—figure supplement 1—source data 1. — (A) Total number of cocaine infusions during short (2 hr, short access: ShA) and long (6 hr, long access: LgA) access. (B) Mean, standard deviation (sd), and standard error (se) of percent of active or inactive lever presses of the total presses during short access. [file elife-90422-fig1-figsupp1-data1.xlsx]

## Sheet: Panel A
sha_1	sha_2	sha_3	sha_4	sha_5	sha_6	sha_7	sha_8	sha_9	sha_10	lga_1	lga_2	lga_3	lga_4	lga_5	lga_6	lga_7	lga_8	lga_9	lga_10	lga_11	lga_12	lga_13	lga_14
1	2	1	0	0	0	0	13	19	21	91	83	89	81	130	101	82	83	105	113	117	145	162	122
0	2	3	1	1	3	31	14	4	16	87	35	110	86	115	104	96	106	134	127	134	158	140	148
6	5	4	0	3	7	9	21	19	20	64	78	80	73	89	79	58	57	33	67	16	33	50	28
1	2	6	7	7	25	34	32	31	31	83	78	90	81	106	105	107	113	129	132	151	136	134	130
2	2	1	0	0	0	0	1	1	0	3	3	64	16	54	25	75	10	24	68	93	104	98	41
2	1	9	0	1	1	0	2	0	2	51	72	93	114	159	111	114	121	122	227	149	162	155	140
0	4	0	1	0	0	1	0	0	0	3	0	0	0	3	1	3	2	7	106	179	124.5	70	44
0	5	6	3	2	0	0	0	0	0	0	0	0	0	0	0	0	0	0	1	1	0	0	0
0	1	5	3	1	2	1	2	0	0	5	2	10	9	119	130	124	126	145	77	173	158	144	152
1	0	2	0	4	3	5	9	19	44	149	125	116	86	23	129	130	86	115	137	221	205	172	187
0	0	2	3	9	27	41	42	37	38	104	102	93	124	105	96	100	97	100	117	106	120	119	118
0	1	0	0	0	0	0	2	3	2	2	1	3	3	2	3	2	6	4	5	74	116	107	110
1	1	2	0	0	1	3	0	1	0	2	2	0	0	1	4	13	92	113	96	121	110	115	120
1	2	3	0	2	0	1	1	1	0	0	0	2	1	0	3	0	3	0	6	80	154	180	144
4	2	0	0	1	4	1	0	0	2	31	88	102	117	108	90	59	62	72	86	98	115	116	121
7	9	4	37	53	44	29	36	34	40	117	106	109	65	131	128	128	123	135.5	148	162	186	160	169
6	3	4	2	5	5	12	17	7	21	107	82	79	93	84	82	96	95	51	108	103	64	127	115
8	2	0	1	1	2	1	3	1	1	4	4	0	104	132	126	112	116	98	140	129	149	167	140
4	2	14	22	27	41	28	42	44	46	98	98	117	120	89	83	75	95	107	121	97	112	118	123
8	6	6	41	38	41	38	43	43	41	129	117	116	116	108	102	112	120	125	130	160	168	160	161
36	8	9	5	19	32	34	39	36	36	115	82	101	119	92	90	107	150	89	119	110	182	83	140
3	1	2	1	0	2	0	1	0	3	2	2	3	0	2	0	1	2	3.5	5	10	5	5	9
0	1	0	1	2	0	0	1	3	3	22	32	5	12	14	0	2	14	106	25	27	37	31	48
5	4	3	8	20	18	16	11	10	12	57	38	72	90	112	101	101	101	120	115	108	112	116	122
3	2	3	2	2	24	30	42	58	47	76	105	102	111	111	107	104	104	87	104	87	97	110	124
0	0	2	3	2	1	3	2	1	0	1	3	3	2	3	4	0	1	1.5	2	0	3	0	2
6	2	4	1	0	1	3	2	0	2	2	9	9	100	111	139	104	115	130	24	46	62	88	127
2	2	4	1	0	3	4	15	0	0	0	0	0	0	0	0	0	0	0	0	0	0	0	0
19	15	39	31	35	31	38	32	34	36	98	92	98	97	108	106	106	113	103	103	106	104	106	122
0	0	0	0	0	2	0	0	1	0	16	14	101	118	134	145	114	119	117	140	121	128	139	180
1	0	2	1	1	0	2	2	2	0	9	4	5	9	4	24	134	60	80	94	132	97	127	148
2	1	2	1	2	1	0	2	0	0	4	8	8	5	9	7	30	26	55	0	76	0	2	133
1	1	2	2	2	4	3	2	15	25	94	118	19	30	8	13	8	5	11	8	13	10	9	9
4	3	5	20	5	9	5	12	0	3	66	22	30	69	73	72	102	108	94	92	97	105	119	119
3	1	0	0	0	15	18	15	0	10	15	3	3	1	10	9	4	9	4	8	5	4	3	5
1	1	4	1	2	2	3	5	7	6	32	9	3	16	30	8	27	2	5	30	20	24	10	21
1	0	0	1	0	2	0	3	1	3	6	5	7	7	8	5	8	2	4	4	2	7	2	3
4	3	3	1	5	5	5	8	5	1	5	8	9	3	46	33	9	86	34	113	117	117	117	129
5	5	1	4	1	3	5	3	11	21	57	97	121	105	131	107	126	131	130	143	153	131	150	150
6	1	5	4	4	2	2	2	0	3	6	1	3	3	6	20	28	65	69	89	111	107	119	128
1	0	0	2	2	2	2	1	5	0	2	6	6	6	6	53	53	118	120	133	153	152	135	143.5
5	5	0	0	2	0	1	1	3	1	4	7	24	6	41	4	11	54	94	97	128	131	170	199
4	1	4	0	4	0	1	3	1	2	3	10	12	23	26	25	32	32	36	61	52	26	22	14
1	6	3	3	2	7	5	6	5	5	8	74	44	51	59	63	56	38	89	111	125	120	133	89
0	0	0	1	4	0	2	0	3	4	19	75	13	63	72	59	62	29	91	83	90	77	52	104
0	0	0	0	0	0	0	1	0	2	26	64	40	109	118	121	103	102	127	113	114	114	127	136
0	4	1	3	2	6	16	16	13	16	47	98	73	92	100	92	98	86	89	99	101	100	104	108
2	0	1	0	0	1	0	2	2	0	7	4	6	4	5	2	37	45	45	53	60	66	73	93
2	0	1	0	0	1	1	3	0	4	8	15	18	66	89	72	109	129	127	118	130	129	147	145
7	1	0	1	9	4	2	3	8	3	17	14	14	23	18	86	61	62	121	125	116	153	134	143
2	0	1	0	1	3	7	10	10	20	44	20	19	76	54	53	87	114	142	110	118	102	114	121
4	15	38	42	35	35	43	51	45	37	99	98	111	106	114	108	89	97	105	105	111	111	108	112
0	0	1	25	10	31	32	43	46	43	97	116	142	149	139	124	127	140	155	117	128	135	147	143
8	2	5	10	32	33	49	55	52	48	135	125	146	134	146	141	134	133	151	124	141	155	140	198
0	6	1	0	5	4	14	40	42	38	117	97	111	109	62	85	88	57	78	90	150	117	124	145
1	1	1	4	11	5	3	1	5	6	7	2	5	72	56	19	32	70	95	85	93	67	107	113
0	0	0	1	0	0	0	0	0	4	0	0	0	1	4	9	42	33	41	47	82	108	110	113
3	2	1	0	1	8	5	5	8	23	90	107	127	125	141	120	149	126	104	90	100	97	91	103
2	2	2	2	6	7	4	19	13	41	150	168	153	178	166	150	164	170	176	150	145	143	151	147
4	3	9	32	34	21	33	28	43	39	113	118	121	134	125	104	115	130	129	117	116	115	121	136
1	4	3	3	7	45	48	60	61	58	173	173	147	192	197	192	171	252	305	207	190	175	177	155
3	0	1	0	0	2	1	0	0	2	6	34	113	125	126	117	132	138	142	118	116	129	128	105
3	2	0	6	28	0	16	62	24	58	200	165	131	201	7	136	126	127	167	140	136	174	156	142
4	2	2	1	1	2	4	26	41	59	148	145	178	167	202	141	144	163	205	157	179	184	210	173
1	0	0	0	2	3	1	1	0	4	4	4	20	22	15	21	143	111	57	53	161	50	148	59
3	3	1	1	4	1	2	0	3	1	6	1	3	4	15	18	37	21	23	46	41	23	25.5	28
2	0	1	1	1	1	0	2	1	2	5	4	3	4	3	12	17	71	105	102	106	121	117	149
2	1	1	1	5	1	0	1	1	2	16	55	77	112	115	109	97	122	135	115	124	135	129	145
0	1	0	0	0	0	2	0	0	4	24	44	31	95	73	59	82	88	92	79	86	94	92	90
1	2	0	0	0	2	4	2	6	3	9	11	21	11	15	19	12	14	66	48	41	72	59	115
3	7	5	2	5	4	2	3	59	90	90	88	87	106	101	82	90	95	111	88	95	99	96	117
4	1	0	0	2	1	0	0	0	1	0	0	0	2	3	2	8	79	56	83	118	97	105	117
3	0	3	6	6	3	3	2	3	4	28	44	58	55	64	80	90	97	109	101	111	105	102	101
4	4	3	5	5	4	2	6	2	18	121	92	112	116	134	108	108	116	115	96	86	105	102	88
4	0	1	0	1	0	0	0	0	0	0	1	1	1	1	2	0	2	2	77	43	93	197	183
7	3	5	15	16	20	14	10	18	28	16	22	0	0	0	0	0	18	100	94	86	71	47	121
2	1	1	0	0	1	1	1	1	1	2	2	2	3	4	1	4	3	9	6	4	69	87	90
8	3	3	3	2	7	26	33	41	46	158	157	162	162	172	159	156	163	191	144	161	152	122	142
1	2	2	0	1	0	0	0	0	3	8	15	23	50	51	56	98	77	108	114	128	144	163	164
4	2	3	2	3	4	6	10	30	33	121	148	134	138	145	91	135	144	144	137	147	151	155	156
3	3	5	8	9	7	31	21	47	18	46	38	116	136	146	123	129	135	138	128	137	144	145	159
9	13	8	2	1	8	1	7	50	47	136	166	165	149	163	149	163	185	179	151	174	177.5	181	159
4	3	4	9	5	10	15	15	9	11	63	92	76	122	102	96	107	123	123	115	134	142	126	143
9	8	6	11	15	14	21	16	20	21	77	99	98	107	114	102	110	113	119	107	122	133	140	138
8	6	8	6	8	7	1	3	2	3	14	8	19	101	136	107	110.5	114	127	105	108	120	119	142
0	2	1	0	3	2	3	2	4	7	31	32	11	48	30	46	67	62	114	86	99	103	65	107
3	2	1	1	2	0	0	0	0	0	4	0	0	0	0	1	0	1	0	0	0	0	0	0
8	2	3	5	8	10	17	21	18	8	70	50	57	87	14	69	82	80	98	93	99	92	88	100
6	7	2	6	2	8	5	10	21	18	90	59	79	87	53	90	100	60	123	109	103	121	116.5	112
24	5	6	10	12	3	5	3	8	9	85	69	56	101	71	113	42	128	119	105	117	107	99	129
53	33	27	24	27	20	24	26	25	30	103	104	108	112	115	129	135	177	137	140	158	155	152	130
23	25	12	11	6	2	10	2	7	14	47	66	64	105	104	122	112	129	130	122	128	155	143	143
23	11	3	6	4	4	5	2	1	4	51	100	36	80	34	94	72	85	56	36	65	98	110	93
12	6	4	4	4	5	8	14	15	14	56	43	36	44	43	42	41	49	43	40	45	47	48	32
19	8	7	11	2	2	4	10	11	10	34	60	51	67	71	70	77	70	73	47	64	94	51	83
4	27	9	25	11	23	25	23	27	20	92	99	92	96	99	101	103	138	103	121	135	143	129	120
2	4	0	0	0	31	26	24	25	21	84	80	83	79	91	82	82	94	86	77	92	92	105	100
2	5	0	0	2	4	0	5	1	4	50	94	89	99	87	95	102	123	104	109	109	127	142	117
4	0	1	0	1	0	0	0	0	1	22	50	43	79	113	113	118	128	123	106	143	147	147	171
4	0	0	2	3	29	26	26	30	31	67	76	78	83	78	90	99	102	107	95	106	111	106	104
1	1	1	0	0	0	0	0	0	0	0	1	0	0	0	1	0	0	1	0	1	0	2	0
4	5	1	6	22	51	31	31	38	42	131	136	136	123	104	134	133	171	129	138	167	162	74	141
2	1	2	2	0	0	0	0	0	1	0	1	1	42	16	30	107	109	112	114	129	134	108	111
1	2	1	1	1	3	1	0	1	0	0	3	4	5	6	5	1	63	38	61	64	66	53	35
5	8	7	23	13	64	26	31	26	19	149	109	153	194	135	132	146	149	136	125	139	168	148	136
1	2	2	3	2	5	36	51	35	39	164	145	141	146	134	148	173	171	198	148	179	85	189	148
3	2	0	0	1	3	16	9	63	55	152	123	134	134	121	130	125	159	149	142	150	147	128	167
1	1	1	0	0	0	1	0	0	1	1	4	1	1	4	3	1	5	4	4	24	117	115	112
3	1	2	0	0	0	0	1	1	0	5	29	91	149	115	125	82	97	119	117	138	142	180	163
2	1	0	1	1	2	3	7	7	2	41	32	19	48	61	39	17	18	35	28	24	32	15	26
10	4	5	1	2	1	2	1	1	3	42	87	126	137	161	138	144	164	137	133	154	138	121	132
5	4	2	4	1	8	9	3	10	19	68	54	80	85	89	92	101	101	104	95	98	100	111	102
4	2	2	3	6	4	29	5	27	10	48	49	61	96	105	110	117	118	113	105	104	125	107	103
4	3	1	2	4	1	4	7	6	12	35	31	31	55	54	76	86	75	99	75	83	79	79	92
4	0	2	2	0	0	2	2	0	0	0	2	3	3	3	12	49	89	109	87	104	102	44	109
0	1	0	0	1	1	3	5	2	1	13	10	23	57	50	92	110	92	132	61	19	60	80.5	101
66	43	49	35	36	42	41	42	45	50	141	163	170	153	140	131	134	150	143	133	140	152	160	137
3	2	2	0	2	1	0	2	3	1	8	9	9	14	30	11	21	60	89	92	83	51	49	92
1	0	1	1	2	2	1	2	1	1	7	7	27	30	97	76	121	131	52	127	120	103	109	117
5	2	2	2	1	7	6	10	4	9	86	87	80	102	114	129	119	128	116	123	113	110	123	135
2	2	3	3	1	4	1	1	0	4	15	20	21	17	65	65	50	35	47	44	58	41	78	55
15	3	7	16	21	23	26	27	27	24	99	115	122	125	108	103	110	93	98	92	108	104	109	110
7	6	15	16	17	27	29	28	30	38	119	65	125	122	113	109	122	107	111	103	115	109	108.5	108
0	0	4	0	2	4	2	1	0	0	2	17	41	51	32	29	31	108	92	99	102	105	103	98
5	2	3	0	2	3	2	1	1	4	13	25	37	29	73	56	105	98	123	106	98	113	120	103
3	3	2	4	0	4	3	3	8	8	126	108	114	128	138	141	144	145	162	146	155	147	170	148
2	3	1	0	0	2	2	3	2	2	14	7	9	9	8	6	6	3	9	7	10	7	13	15
4	2	4	1	0	1	2	2	1	3	28	6	7	6	9	8	4	11	42	17	35	47	17	30
2	1	1	0	0	0	0	0	0	0	0	0	1	2	0	2	0	0	0	0	0	0	1	0
1	1	0	0	0	0	1	0	0	0	1	1	0	0	0	0	0	0	0	0	0	0	5	0
3	1	2	3	4	3	3	2	4	4	57	4	66	63	75	62	64	47	71	65	94	122	140	142
5	2	6	8	11	15	14	5	10	6	80	86	108	125	100	126	119	124	125	131	121	125	107	152
1	2	0	0	0	0	2	4	1	0	51	44	51	30	40	91	110	118	119	109	115	128	131	125
1	0	0	0	0	0	0	1	0	0	1	0	0	0	0	0	0	0	1	1	1	0	0	0
2	6	16	31	22	41	44	60	54	53	118	112	125	125	127	119	118	129	129	131	122	131	137	134
0	1	0	1	3	6	6	7	56	5	102	90	108	120	115	121	125	139	132	137	131	138	142	154
31	36	41	37	2	6	15	41	60	48	122	119	113	117	133	114	129	128	127	123	125	140	141	153
2	1	0	2	4	2	1	2	0	0	6	1	2	1	2	1	2	0	0	7	8	12	1	15
3	4	11	6	2	23	19	36	29	34	120	134	130	125	122	120	128	144	142	134	128	146	132	152
1	0	0	2	1	5	4	5	62	32	111	102	118	120	126	120	124	119	119	124	127	131	127	120
1	2	0	0	0	1	1	0	0	0	1	0	0	0	1	1	1	1	0	1	2	37	75	123
2	6	13	2	1	23	24	36	42	38	114	114	111	107	96	112	126	125	128	118	118	124	127	134
2	1	0	0	1	1	2	2	3	2	53	106	103	104	110	104	115	114	126	124	114	130	129	141
0	0	0	0	0	0	0	0	0	0	3	0	0	3	1	94	59	70	83	75	67	82	86	86
4	1	0	0	0	0	0	1	0	0	7	1	88	119	128	89	90	97	94	104	27	18	106	98
5	2	0	2	4	25	5	5	24	23	31	38	65	59	77	104	97	79	120	117	111	134	120	126
2	0	5	3	42	47	34	41	38	38	111	121	130	122	117	184	151	157	154	159	136	156	173	186
0	0	4	2	3	10	29	7	20	4	70	105	81	163	185	178	111	61	147	93	111	133	130	130
26	22	9	13	10	2	16	3	1	1	12	48	29	21	10	3	53	17	41	26	68	20	40	13
3	3	2	10	3	9	10	16	9	8	8	20	4	5	84	43	46	78	111	114	116	122	129	107
4	3	0	0	0	0	0	0	0	1	4	2	1	3	2	1	2	1	0	7	0	1	0	0
0	1	1	1	0	1	1	8	25	5	51	13	105	218	165	62	137	125	158	154	117	131	133	140
53	9	2	0	1	2	3	2	7	28	93	103	96	87	83	85	87	94	87	99	85	88	87	94
2	4	2	1	1	1	4	1	3	3	4	6	118	119	124	205	133	144.5	156	133	119	143	111	134
4	13	32	24	9	13	12	15	20	26	120	149	70	143	119	179	125	60	31	114	116	113	126	141
4	1	2	0	0	3	0	2	1	1	5	2	1	1	4	0	6	1	5	3	1	0	2	2
1	3	3	8	5	11	7	6	12	19	19	27	16	30	16	22	26	21	7	17	10	13	10	6
2	3	3	4	1	2	1	4	1	1	7	8	9	10	93	27	99	60	61	123	126	144	142	157
1	1	1	1	1	4	4	5	8	14	105	77	120	103	95	103	103	99	0	0	0	1	0	0
2	2	1	2	0	1	2	1	3	2	3	0	2	4	7	4	1	2	2	101	86	96	45	53
28	12	7	17	9	3	4	2	0	3	47	65	50	76	98	106	107	103	94	107	111	116	120	126
4	13	18	13	14	13	14	15	16	14	67	92	119	129	144	128.5	113	131	35	147	138	144	147	172
0	1	0	2	0	0	1	0	0	2	2	97	107	108	98	87	89	87	96	99	93	100	107	100
3	2	2	0	0	1	0	1	0	1	3	0	1	0	0	1	0	1	0	0	0	0	0	0
0	2	5	3	2	3	3	7	9	8	34	62	77	45	70	117	99	125	121	133	135	142	145	148
1	2	4	3	0	5	2	1	2	2	11	16	17	16	31	37	24	45	36	87	108	121	131	140
6	1	3	0							4	2	3	1	1	1	1	0	1	2	0	0	1	0
0	0	0	0	0	1	2	1	2	4	19	41	75	51	63	130	127	106	125	152	126	136	131	167
3	2	3	3	2	6	1	1	0	0	1	1	3	3	6	8	6	5	11	123	23	93	101	100
1	2	1	0	1	3	1	1	0	2	1	6	11	40	41	52	26	92	105	116	116	64	84	64
6	5	5	4	26	39	36	45	38	50	123	77	91	137	116	119	157	150	156	185	114	122	161	133
1	0	0	0	0	0	0	0	0	1	7	6	7	16	23	22.75	22.5	22	17	14	12	9	17	5
0	3	6	3	10	32	23	26	12	19	102	112	149	131	141	115	125	118	131	144	121	153	151	163
5	4	4	3	7	6	4	5	2	2	46	45	34	36	22.5	9	26	26	29	28	20	14	5	16
1	5	14	21	22	18	20	18	11	15	75	74	77	110	117	104	110	117	117	104	107	107	117	105
5	6	0	25	29	37	31	32	31	33	100	110	104	108	121	108	121	121	116	122	115	109	116	115
24	35	40	39	33	28	35	13	34	35	102	96	96	100	104	88	96	108	97	113	98	89	95	95
3	1	0	0	0	0	1	1	1	0	43	26	11	15	56	42	22	50	32	36	39	42	54	31
4	5	0	0	1	1	3	2	0	1	6	3	6	6	10	10	10	13	9	11	10	8	7	6
2	2	6	8	56	27	32	34.5	37	36	106	88	97	99	105	94	97	105	101	106	84	80	85	100
3	5	9	12	4	14	20	26	19	17	83	95	100	98	102	89	80	76	75	64	35	41.5	48	19
1	9	13	23	15	26	21	22	17	24	21	37	25	46	63	64	80	89	87	89	96	107	107	113
3	4	2	1	0	2	0	0	0	0	3	9	25	42	22	47.5	73	55	61	67	63	74	79	61
5	3	4	11	13	7	5	9	18	22	104	87	103	102	110	108	101	111	111	130	145	151	135	143
1	0	0	1	0	2	1	2	2	1	54	73	64	89	129	106	109	123	122		19	118	118	118
4	0	1	0	1	0	1	2	5	1	56	52	102	95	147	144	148	145	151	156	182	173	17	95
1	1	2	0	0	1	2	1	1	0	3	1	3	2	6	8	5	51.5	98	128	100	109	108	108.5
2	2	2	2	4	20	10	17	14	10	51	41	38	37	40	30	18	37	30	15	20	74	14	44
	14	8.5	3	4	2	1	1	2	2	9	5	47	33	21	18	15	36	15	51	56.5	62	74	77
0	1	0	2	1	2	0	0	0	0	4	39	36	119	117	128	94	143	123	105	87	114	116	113
4	4	1	2	1	4	2	1	3	1	7	8	17	83	95	80	91	107	113	106	110	138	131	126
11	15	6	30	20	19	35	35	67	49	46	141	141	81	21	16	134	147	132	132	134	119	145	153
10	6	4	2	2	5	7	3	3	1	11	59	62	75	88	82	114	139	99	60	124	165	121	176
0	2	2	0	0	2	0	1	0	0	3	11	118	100	125	117	148	175	132	179	162	156	159	91
22	3	1	0	1	1	0	2	3	1	24	5	1	0	0	1	3	9	3	3	7	11	17	5
1	0	0	0	1	1	1	0	1	2	7	7	4	3	3	1	2	1	1	4	17	3	2	1
0	0	0	0	0	1	0	0	0	1	0	0	0	0	1	0	0	1	0	0	1	4	2	1
1	0	1	1	1	0	1	1	0	0	4	5	2	1	1	3	0	1	4	71	92	71	73	48
0	4	0	0	0	0	0	1	1	0	32	32	3	3	56	15	29	19	6	43	10	10	85	85
0	2	1	1	0	1	1	0	1	0	17	9	4	14	16	10	5	5	4	3	7	8	4	71
3	1	4	4	0	6	2	6	8	8	31	28	39	52	75	69	70	78	74	79	86	102	92	93
2	2	0	1	0	2	0	1	0	0	2	6	2	4	2	1	4	1	1	1	2	3	6	2
2	4	1	3	2	6	5	11	13	9	46	48	50	67	86	82.5	79	83	92	84	103	98	100	100
2	3	2	4	1	3	2	3	3	1	7	9	6	7	6	3	2	3	2	2	3	1	4	1
3	0	0	0	1	22	23	25	25	11	62	62	63	82	86	72	68	64	71	80	87	83	89	91
3	3	15	25	26	29	28	26	26	1	100	93	60	97	108	91	90	87	91	98	110	107	105	119
0	0	0	0	1	1	0	0	0	0	3	0	0	1	0	0	0	0	0	0	1	0	1	1
5	1	1	1	1	1	2	0	1	0	0	5	27	64	81	72	72	76	78	83	83	90	86	80
0	2	0	2	0	0	0	0	0	0	0	0	1	0	0	2	1	1	1	0	0	1	0	1
1	0	0	0	0	0	2	2	1	0	0	1	1	2	2	2	4	7	27	30	52	8	0	0
0	1	0	2	0	0	1	0	1	0	0	1	0	2	2	0	0	0	0	0	1	1	1	0
4	3	5	3	8	19	16	11	12	4	22	12	16	5	8	9	4	12	5	2	17	20	20	3
1	0	1	0	1	0	0	1	1	0	3	3	2	1	37	56	36	63	32	97	99	112	107	109
4	2	4	3	0	1	0	2	1	0	60	100	94	67	121	109	107	108	121	16	129	132	145	138
2	3	0	0	0	2	0	1	1	1	1	1	1	1	3	3	4	2	2	2	10	34	69	44
8	2	5	5	1	4	1	0	1	1	15	22	7	11	11	7	10	8	11	11	65	46	60	105
4	3	0	1	4	3	3	5	2	2	8	13	9	14	5	4	2	5	2	6	4	9	7	2
2	5	3	2	1	1	3	4	7	6	60	42	65	86	90	85	81	91	90	93	111	115	122	124
1	2	2	1	0	2	2	0	6	2	39	46	14	50	48	63	47	52	49	71	71	78	87	98
2	1	1	0	1	1	1	0	1	0	21	24	16	51	97	98	112	107	106	120	138	136	126	141
3	1	0	1	2	2	2	2	3	7	119	109	122	143	132	128	131	147	165	162	199	95	206	276
0	2	3	3	8	1	6	1	2	1	5	7	1	2	3	2	1	0	0	2	0	0	0	1
2	2	2	2	1	1	1	0	1	1	6	16	14	10	18	11	12	15	11	6	70	75	78	96
	1	2	0	2	20	40	29	46	50	140	112	121	122	151	129	139	145	155	155	142	158	148	136
	0	0	1	2	1	0	1	0	3	2	2	2	5	7	31	40	28	22	68	77	92	128	161
	7	5	5	3	2	10	11	16	14	100	83	92	105	106	110	113	100	103	111	120	120	121	116
	6	2	2	1	1	0	5	2	0	5	4	3	79	39	101	122	157	53	174	118	48	121	254
	1	0	0	1	0	1	0	0	1	6	8	6	14	11	5	42	118	149	184	218	146	163	89
	0	0	0	0	0	1	0	0	0	2	0	0	0	0	0	0	1	0	1	3	0	1	1
	14	28	34	24	29	35	38	36	35	77	77	89	88	88	83	92	92	80	101	76	83	85	83
	8	7	29	31	33	37	41	48	46	109	104	105	109	104	112	113	116	119	113	128	127	106	101
	8	4	3	0	54	26	34	32	30	112	115	120	109	139	127	133	145	139	137	129	127	128	190
	1	0	0	1	0	0	0	0	2	4	23	6	60	59	94	84	109	121	111	126	126	142	141
	2	1	0	0	1	1	0	0	0	2	2	12	14	30	46	80	58	55	42	65	71	108	58
	1	0	2	0	0	0	0	1	2	12	21	48	55	69	81	74	73	86	83	75	71	62	91
	2	0	1	1	1	2	1	1	2	6	4	62	102	106	120	108	125	122	130	132	124	120	65
	0	0	0	0	0	0	0	0	0	31	41	28	25	20	24	45	30	71	64	75	66	96	82
	0	0	16	89	50	8	34	45	46	127	113	96	120	125	122	124	110	120	120	116	119	116	117
	0	6	0	0	0	0	0	0	0	2	2	4	1	1	44	45	65	114	61	126	183	92	130
	1	1	3	20	13	19	35	23	35	59	94	48	61	55	39	50	35	66	37	67	77	61	34
	26	19	21	34	41	57	58	49	45	118	125	115	117	130	119	125	125	123	116	121	135	130	138
	2	1	2	15	5	3	4	4	2	14	4	82	32	89	72	55	34	13	70	134	86	48	123
	37	17	22	29	34	32	41	37	39	89	70	78	70	89	88	86	97	100	103	90	100	95	98
	7	7	12	39	25	29	33	29	23	110	111	85	81	112	97	99	94	101	113	102	79	42	98
	2	0	1	0	5	1	16	31	28	75	77	71	68	87	80	80	70	88	46	88	85	105	105
	1	2	0	0	0	0	1	1	2	11	33	9	9	72	53	40	14	41	82	79	73	84	101
	10	6	9	18	18	19	38	32	34	61	67	57	64	113	92	100	99	92	94	90	96	80	88
	1	1	0	0	1	2	0	0	0	6	8	9	37	73	50	85	66	97	105	95	100	104	109
	0	0	0	0	0	5	2	2	4	4	6	5	2	11	9	9	5	10	11	4	3	2	6
	1	3	1	3	5	3	0	5	3	9	12	14	26	12	11	14	47	50	65	70	76	81	70
	0	1	0	0	0	2	0	1	0	51	62	84	69	91	94	92	95	94	88	87	90	93	80
	1	0	0	0	0	1	1	1	0	2	2	7	3	18	25	67	95	91	91	96	105	107	107
	0	3	6	5	2	5	12	3	1	16	25	33	32	26	12	16	23	29	35	44	36	19	33
	26	27	26	29	32	40	43	45	43	140	114	111	116	124	108	103	126	117	109	108	112	115	108
	4	5	1	5	16	20	17	25	17	103	103	104	99	108	104	115	118	108	48	109	119	114	118
	0	2	17	24	7	11	9	5	2	26	10	24	12	18	49	9	90	20	85	78	69	85	105
	70	61	21	18	43	46	49	54	49	115	85	73	61	78	69	71	94	84	92	83	60	40	85
	0	1	5	8	11	9	2	5	8	43	54	52	74	88	91	66	72	82	101	106	78	47	93
	58	3	5	4	1	3	0	1	1	1	34	9	25	77	96	102	104	105	107	119	124	56	103
	12	4	13	24	35	37	39	37	34	100	106	109	104	119	106	116	122	123	119	116	124	114	113
	13	4	3	0	8	16	3	8	2	58	63	64	72	95	103	108	103	25	116	110	113	110	93
	0	1	1	1	5	5	2	2	1	41	56	77	60	87	79	95	103	115	127	99	116	104	103
	1	0	0	1	1	2	1	0	0	2	2	0	0	0	0	0	0	0	1	1	0	0	0
	4	6	6	15	9	14	16	13	10	25	22	20	17	15	23	16	43	23	45	77	85	68	52
	3	4	4	6	30	43	32	30	27	90	76	80	79	78	78	88	94	96	89	82	84	89	87
	8	6	4	6	2	20	29	37	32	115	123	125	110	127	116	111	129	128	136	128	125	110	105
	2	1	0	1	4	0	0	0	0	27	56	62	75	94	98	98	110	121	102	92	118	123	116
	2	1	1	3	0	2	0	0	0	3	3	4	8	7	32	23	26	21	17	18	22	17	24
	2	3	3	7	17	30	22	47	37	79	104	103	106	100	104	108	109	102	92	92	98	109	104
	0	2	0	2	4	8	5	6	6	87	81	114	109	93	83	57	71	96	94	82	103	102	105
	2	1	0	0	2	0	2	2	2	33	35	29	16	48	71	36	37	33	75	58	61	105	112
	1	1	0	0	2	1	2	1	1	4	4	2	3	6	22	26	77	7	112	100	103	64	95
	3	2	3	1	1	10	6	10	5	36	12	10	8	13	10	15	23	2	13	1	9	7	23
	21	37	34	14	26	28	30	32	40	86	97	116	101	110	114	114	109	112	117	120	120	116	120
	0	0	0	0	1	0	1	28	34	68	115	137	161	139	125	146	148	145	141	168	133	141	79
	1	0	2	1	4	5	0	3	2	5	22	29	67	71	81	109	171	101	116	8	2	4	7
	4	1	3	2	0	0	0	3	5	16	28	6	21	43	21	16	81	72	98	73	164	97	109
	4	19	9	1	25	34	30	54	50	127	123	233	142	110	133	128	124	118	127	148	142	176	141
	1	1	0	0	1	1	0	1	2	1	1	0	2	1	31	105	160	121	121	132	136	250	190
	3	5	3	2	5	19	7	20	12	32	41	34	29	40	71	74	101	87	82	91	46	88	76
	2	3	0	0	6	3	4	9	12	15	26	61	83	69	91	101	105	106	104	108	99	97	90
	0	1	0	0	0	1	0	0	1	1	3	0	0	0	0	0	1	1	1	2	33	40	48
	24	23	16	11	29	22	38	42	40	129	137	147	136	126	143	175	178	146	140	160	161	142	141
	8	5	6	1	51	53	81	92	80	155	217	154	200	91	160	157	158	11	9	2	9	10	11
	11	39	53	51	46	50	62	45	54	105	108	115	100	116	121	120	132	104	108	118	124	118	89
	2	4	7	5	12	32	16	37	38	90	102	94	138	123	129	143	166	148	151	172	163	218	165
	1	1	1	0	1	1	1	2	4	49	66	45	46	58	112	117	129	157	138	140	13	55	13
	5	0	0	0	3	0	1	24	25	58	68	67	74	80	88	91	71	80	80	79	79	69	77
	18	26	56	46	52	53	47	42	47	108	114	119	108	125	140	139	138	335	113	133	122	119	126
	3	2	2	1	2	7	3	2	6	53	13	0	62	43	73	87	109	92	82	87	99	114	115
	0	1	0	0	108	75	47	45	32	142	126	134	115	132	133	130	140	117	123	139	152	136	125
	8	13	11	9	59	54	63	56	22	60	69	104	194	102	105	117	137	130	116	113	120	120	276
	2	0	0	0	2	1	0	8	2	15	4	27	12	25	65	56	30	46	87	52	60	67	55
	1	2	10	2	5	3	2	0	3	9	90	97	77	79	78	87	98	104	116	110	127	123	113
	26	28	22	37	37	31	20	33	29	76	80	85	84	79	80	101	111	111	105	122	109	108	94
	27	35	37	29	34	29	31	39	33	105	116	93	96	107	107	108	108	103	114	120	121	123	115
	27	27	27	50	41	50	42	42	37	87	96	115	100	104	94	97	107	113	95	101	101	126	123
	11	4	4	4	17	34	21	31	25	78	80	88	82	109	143	104	119	111	134	139	131	151	119
	1	0	1	1	8	6	3	36	43	43	98	111	110	117	103	104	106	100	106	116	128	101	107
	41	19	17	35	35	42	44	40	49	111	86	106	101	98	112	106	106	108	32	120	118	117	113
	23	17	6	6	26	18	24	19	20	39	40	50	42	34	93	75	93	69	70	61	56	84	77
	3	3	4	7	12	12	3	5	3	6	18	35	38	79	89	99	119	105	86	106	131	16	12
	9	10	3	2	6	6	6	11	7	11	8	11	3	3	2	0	6	10	7	7	3	9	7
	3	5	4	4	21	14	8	10	5	7	7	19	48	31	37	40	64	70	223	322	14	11	5
	11	6	6	13	15	14	9	8	5	16	9	10	7	6	3	8	4	8	7	7	2	4	2
	0	0	1	0	0	1	2	2	0	1	2	2	1	0	1	2	13	142	29	62	99	99	106
	21	18	20	20	17	12	20	32	28	0	100	111	104	89	106	108	106	111	118	117	121	114	112
	0	0	0	0	8	1	0	4	0	3	3	2	1	2	2	0	0	1	1	0	2	3	3
	2	1	0	1	1	3	4	87	12	11	2	3	1	14	7	17	65	65	78	95	87	86	89
	21	30	29	25	29	23	22	25	28	77	77	101	72	96	44	88	102	85	98	21	75	104	87
	24	19	19	20	22	26	30	26	31	77	80	72	66	82	70	88	106	103	101	73	91	92	98
	1	1	2	8	4	4	3	1	0	7	2	26	2	41	42	7	66	60	53	58	53	76	55
	6	4	4	4	21	16	15	19	19	63	56	61	25	81	95	94	109	80	56	6	57	103	57
	12	13	16	13	19	19	21	10	4	46	27	37	13	31	28	9	59	15	26	20	10	84	82
	0	1	2	1	1	3	0	2	0	6	6	9	8	8	3	2	7	9	0	2	3	4	4
	3	4	2	3	6	3	5	5	6	13	27	45	28	13	8	9	13	10	7	7	7	13	6
	3	6	6	5	7	8	14	14	11	37	60	77	101	110	109	104	121	109	113	127	128	115	130
	10	13	5	8	13	16	12	14	10	47	54	59	86	99	105	44	115	108	104	86	101	34	4
	35	13	18	24	22	33	61	48	64	123	109	115	86	81	105	116	128	121	132	122	130	127	144
	10	8	6	9	16	13	14	20	14	68	97	81	64	76	66	83	109	105	101	92	109	108	125
	5	4	4	4	5	7	5	6	13	42	33	74	50	78	85	97	69	54	63	63	58	92	75
	1	0	0	0	0	0	0	2	1	10	1	9	25	23	18	3	10	30	24	29	33	28	32
	21	21	20	20	32	42	64	40	34	93	98	104	70	114	106	98	151	45	49	50	42	79	82
	5	4	4	5	18	10	7	17	10	38	48	52	66	71	68	54	235	71	60	50	58	73	68
	2	1	2	10	15	21	1	14	23	40	53	79	45	69	87	84	79	254	73	78	91	98	100
	10	11	7	8	11	5	1	13	31	82	83	93	72	79	85	95	94	83	85	83	93	110	101
	0	2	1	84	39	22	30	34	36	58	83	90	95	96	99	99	103	94	83	93	74	99	96
	11	3	11	6	11	7	2	3	7	29	26	36	32	33	58	39	22	27	21	27	32	53	103
0	3	1	2	3	4	1	4	6	12	338	377	80	69	70	71	82	93	110	91	93	87	63	68
1	2	0	3	0	27	38	35	34	24	124	142	159	177	152	167	157	157	172	166	155	172	189	164
3	0	0	0	0	0	1	0	0	0	3	4	5	13	19	11	66	55	61	92	102	117	144	145
2	0	0	0	0	2	4	9	4	20	25	12	12	41	12	2	62	60	70	81	111	136	144	149
0	0	0	0	0	1	0	0	0	0	4	7	74	48	73	65	94	105	102	170	60	65	103	88
82	37	38	41	50	51	43	19	29	19	202	132	92	188	277	119	124	112	134	148	21	5	35	103
3	3	3	5	2	8	6	17	22	30	104	106	87	111	62	57	52	72	83	97	119	113	137	138
7	12	1	2	2	3	24	24	14	24	135	119	213	222	150	172	157	178	170	197	163	133	157	157
2	1	4	3	6	15	32	23	34	36	72	108	95	117	90	113	7	100	90	99	84	38	42	41
2	2	7	2	9	35	83	49	27	30	62	86	87	100	113	268	104	132	111	126	133	127	140	134
1	1	0	15	14	14	7	7	8	6	27	38	93	36	71	54	67	85	104	103	123	119	136	149
2	4	5	4	42	30	37	52	41	40	108	101	95	113	103	108	123	127	137	134	117	112	114	117
6	1	1	2	0	3	5	7	11	10	59	32	39	5	0	15	2	2	64	70	40	28	30	76
5	5	2	2	3	3	13	24	25	34	87	85	105	114	99	68	76	78	89	106	103	103	106	107
0	0	0	0	0	0	0	0	0	9	13	0	4	1	0	0	1	0	0	3	1	2	0	2
11	6	11	6	4	6	5	5	2	6	13	14	9	9	12	4	10	6	9	6	5	7	6	5
2	1	0	2	0	4	8	7	13	9	44	44	38	34	9	27	34	46	16	62	37	30	38	9
3	0	5	4	8	36	34	28	28	28	87	88	95	99	94	84	99	110	113	110	115	100	105	55
2	4	2	11	19	19	25	22	19	22	64	65	29	32	47	83	89	81	84	83	79	80	86	88
0	3	0	4	3	3	6	19	26	42	103	95	45	125	128	129	144	143	180	168	159	91	157	141
11	18	24	27	7	33	34	46	41	43	103	109	102	90	109	103	107	117	129	119	122	94	124	106
9	4	2	0	7	11	8	19	51	40	125	125	134	137	125	124	126	126	128	133	141	148	149	154
7	2	2	1	3	3	6	8	6	26	129	20	15	101	143	114	128	135	151	165	164	172	177	158
0	1	0	1	2	9	1	4	2	2	6	3	2	4	21	33	54	55	1	73	87	37	75	92
7	1	0	3	4	8	12	11	8	12	93	88	103	100	92	124	133	130	150	90	166	91	89	188
8	17	8	9	7	10	7	9	11	11	13	8	7	9	9	6	4	2	6	7	0	4	6	4
53	14	12	2	3	6	2	0	1	1	3	2	9	4	5	1	2	2	2	1	0	2	2	2
5	5	5	5	2	3	4	0	2	6	15	21	23	16	30	24	33	31	31	47	43	43	71	87
0	3	12	11	16	18	18	0	18	24	115	76	113	117	101	111	116	97	89	109	100	111	100	129
7	0	3	4	2	24	23	0	34	36	103	90	93	96	98	46	95	97	99	116	110	111	105	109
10	11	12	11	11	13	17	0	15	21	102	59	60	84	142	127	113	105	103	139	124	129	124	120
5	3	15	27	3	31	40	0	36	38	104	101	98	96	81	99	96	90	91	101	97	109	111	104
0	0	0	1	0	0	0	0	0	0	1	1	3	1	2	35	48	80	86	89	74	78	74	87
8	8	7	5	2	9	9	8	5	4	10	12	16	12	12	14	34	24	35	99	102	114	143	125
14	9	5	2	3	2	28	9	12	8	76	68	111	123	124	124	124	131	127	114	124	129	132	117
6	6	3	3	3	8	4	0	3	3	14	4	6	4	10	2	9	4	1	0	6	3	1	2
0	0	0	2	1	5	11	5	9	14	45	36	33	24	33	20	32	39	25	65	108	99	92	96
11	38	10	13	25	26	28	28	32	36	174	72	134	40	101	31	22	19	12	24	16	25	13	10
3	3	20	12	23	15	5	8	13	20	66	70	74	81	90	94	94	96	101	102	100	99	99	104
5	0	4	1	0	8	17	22	17	21	55	54	61	63	69	75	80	87	91	109	72	27	26	20
0	2	6	6	6	11	12	10	7	9	96	112	89	27	12	56	69	71	73	71	80	93	94	16
0	35	4	5	5	10	11	8	7	13	57	44	47	61	92	88	91	88	91	90	95	93	97	101
5	4	1	5	3	5	3	4	1	2	8	10	13	25	47	62	77	97	102	108	107	88	120	129
0	7	24	20	15	19	24	31	34	43	117	95	92	87	79	84	93	95	61	89	87	90	84	86
0	0	0	0	0	1	0	1	0	0	3	0	1	1	1	0	0	0	1	0	0	0	0	0
1	5	2	2	2	10	4	7	6	5	49	65	72	86	89	98	104	100	105	95	105	102	109	113
7	5	4	7	4	6	7	5	6	5	8	10	17	24	19	35	32	40	58	67	82	90	86	83
9	8	10	9	8	16	15	17	12	7	43	19	29	27	21	24	39	47	57	91	83	97	96	100
2	7	9	0	20	21	26	29	21	19	64	69	59	57	56	69	65	85	91	97	89	94	97	98
12	17	11	13	20	22	24	0	21	28	73	77	87	119	110	106	105	73	102	113	101	109	110	130
2	2	1	0	1	80	56	0	26	27	75	29	26	18	97	23	88	13	85	86	78	76	97	94
97	93	58	52	55	52	52	58	56	58	127	111	137	131	131	129	116	126	134	130	127	132	137	128
2	30	34	41	44	34	26	27	28	28	72	84	81	71	71	68	66	65	72	87	77	67	66	78
3	1	1	34	29	34	30	39	41	36	98	96	101	99	99	112	121	129	112	104	109	97	99	85
71	27	8	35	45	43	33	31	44	38	266	129	101	99	99	95	106	107	103	81	87	92	79	93
0	2	0	1	3	4	5	23	28	23	61	92	93	90	90	103	102	99	83	85	98	91	98	104
2	8	4	8	1	3	4	1	3	2	9	86	74	82	82	104	106	49	83	95	92	94	97	104
0	7	4	4	7	16	31	10	12	11	51	61	70	78	78	115	98	102	99	102	99	115	130	124
3	19	11	24	10	36	23	31	37	34	106	109	111	125	125	129	114	119	111	104	110	366	108	125
26	27	26	27	24	32	6	28	28	31	120	89	96	95	95	105	98	98	105	114	98	110	118	118
0	3	8	26	36	22	31	29	32	29	74	70	81	42	42	55	75	58	42	47	27	45	32	30
4	0	0	0	1	0	12	7	4	8	21	39	26	62	62	198	85	164	91	110	115	132	125	71
1	2	9	23	42	35	41	42	36	43	130	101	110	112	112	130	127	111	120	149	127	142	151	143
11	29	23	25	20	19	22	22	22	23	55	56	61	60	60	60	63	64	60	57	56	64	61	64
2	8	2	52	42	18	32	43	43	38	112	123	114	108	108	129	127	132	115	104	102	104	87	91
0	1	0	0	0	0	0	0	0	2	2	8	23	20	20	66	30	30	97	96	82	75	102	89
1	3	1	0	1	1	1	0	0	0	0	1	2	1	1	28	23	14	7	9	76	1	7	0
1	4	0	0	3	3	1	0	0	2	16	24	21	5	5	4	8	9	7	12	8	1	6	3
4	6	3	12	13	27	23	26	18	38	159	118	53	88	88	34	120	100	116	102	54	43	100	77
0	2	0	3	2	4	6	2	1	1	108	93	104	97	97	136	117	150	120	119	117	142	145	142
7	8	6	9	13	12	5	12	7	12	77	59	72	76	76	90	95	96	98	105	100	93	115	96
2	0	9	8	16	28	33	20	20	34	88	79	91	35	35	88	64	93	49	76	59	68	65	84
0	2	10	22	30	2	21	24	0	1	93	81	80	79	79	82	75	71	71	63	63	65	72	69
37	25	60	24	37	51	63	112	125	105	153	128	190	147	147	180	163	230	172	160	149	165	148	96
3	2	0	2	9	11	16	16	12	6	12	10	29	8	8	1	0	0	2	3	3	76	3	22
1	1	2	4	19	12	10	7	5	4	31	23	9	11	11	8	2	12	4	13	11	2	5	5
10	5	2	8	2	10	5	5	3	4	17	17	10	4	4	0	4	0	2	2	3	9	7	4
4	3	2	2	2	3	3	0	4	4	16	36	52	44	44	62	78	90	83	88	69	77	67	78
10	16	20	25	42	0	36	34	33	47	93	91	82	88	88	110	126	127	119	126	108	104	98	92
5	7	9	18	7	9	18	29	29	28	83	83	75	75	75	66	70	78	101	79	78	79	82	84
30	3	1	5	4	6	11	4	5	1	28	53	66	59	59	86	92	97	98	92	94	94	89	93
1	1	2	2	4	0	1	2	1	1	5	4	5	4	4	3	3	1	2	14	47	19	57	40
6	6	9	5	3	5	7	8	5	6	40	80	97	71	71	79	79	94	55	73	80	93	75	49
2	23	39	23	20	21	25	33	33	38	103	108	116	106	106	95	93	100	100	105	99	101	108	99
0	3	17	19	20	17	10	19	19	17	66	66	74	77	77	66	81	97	57	78	79	79	79	84
16	10	3	6	12	6	12	7	2	3	29	7	6	5	5	2	7	7	7	37	87	83	85	95
2	2	2	11	8	4	8	5	3	3	18	38	41	27	27	31	35	45	36	41	48	41	46	42
0	0	4	15	4	2	5	4	4	3	4	7	34	75	75	107	117	132	131	123	95	100	106	105
2	4	1	4	3	0	3	3	3	0	3	1	2	5	5	4	1	3	2	1	0	3	4	5
3	5	2	3	2	5	8	18	23	21	68	68	76	76	76	85	85	88	90	91	99	97	105	98
11	19	12	7	9	26	11	18	14	4	22	39	52	43	43	52	62	75	71	70	108	101	112	121
2	5	5	11	8	29	18	25	23	30	96	75	74	88	88	88	93	108	112	117	109	99	99	103
6	6	4	6	3	10	6	9	17	9	42	27	35	30	30	87	78	102	59	99	82	94	69	92
7	37	12	8	5	14	20	29	28	33	100	98	87	95	95	95	95	112	109	115	112	111	110	117
0	0	0	0	0	0	0	1	0	0	0	0	0	0	0	0	0	0	0	1	1	2	1	1
3	4	5	7	15	21	18	24	24	34	67	43	82	104	104	79	123	166	113	116	124	108	119	119
2	1	0	3	0	4	17	21	21	20	55	68	77	89	89	68	75	83	84	79	92	93	91	104
4	6	2	3	2	2	2	3	6	12	24	25	30	38	38	71	86	87	96	92	88	88	94	86
1	6	13	10	9	17	16	24	24	18	89	108	121	85	85	95	112	135	113	102	109	118	113	120
19	9	4	4	2	2	4	2	5	1	4	3	3	3	3	2	4	5	1	0	1	2	2	0
3	2	11	3	2	2	5	4	4	6	25	42	57	65	65	85	93	92	101	106	94	112	112	103
1	2	6	2	6	50		28	38	35	74	68	65	69	86	85	89	90	92	111	98	100	97	97
0	0	0	0	0	0		0	0	0	3	41	3	6	75	79	84	54	78	299	113	89	105	97
0	0	18	4	15	1		17	18	20	71	69	66	73	88	91	89	94	100	93	99	103	101	112
0	1	2	0	2	0		0	0	0	9	21	34	58	72	99	70	23	40	17	46	23	49	93
6	19	40	26	24	23		22	34	30	76	102	100	86	97	110	118	115	117	121	108	120	125	121
0	0	0	0	0	0		0	1	0	10	4	4	13	11	12	26	53	49	74	35	53	75	139
0	0	0	0	0	0		2	3	0	6	2	0	5	5	1	1	0	5	10	3	1	1	1
0	0	1	7	1	0		0	1	0	2	40	75	63	110	102	94	83	88	104	91	96	104	60
0	2	3	29	36	27		34	30	28	117	90	89	98	96	81	82	95	96	104	101	130	121	124
13	0	0	0	0	0		0	0	0	0	0	1	0	50	80	78	73	74	60	34	28	36	62
1	0	0	0	0	0		5	3	34	159	77	85	94	84	92	78	94	100	107	99	103	108	111
0	0	0	0	0	0		1	2	0	6	4	3	5	81	112	145	140	132	136	139	136	138	139
3	1	9	14	11	14		18	14	15	41	41	45	46	55	58	56	54	52	57	50	53	51	58
0	0	0	0	1	1		0	1	0	7	7	2	3	45	8	4	5	8	19	25	30	7	27
0	0	1	0	0	0		0	0	0	3	59	72	65	100	82	101	106	98	89	96	91	101	99
0	0	0	0	0	0		0	0	0	19	0	0	0	58	30	21	15	105	99	27	71	52	70
1	2	8	8	1	0		29	1	20	55	62	72	85	119	54	71	132	143	117	99	112	126	121
1	1	0	10	34	37		54	44	51	104	79	89	113	103	85	111	121	116	125	98	120	112	103
8	23	13	12	17	20		19	21	29	65	77	83	102	109	113	113	119	115	118	121	132	131	145
2	8	31	29	29	29		25	29	24	66	77	73	88	94	89	94	103	103	114	104	116	129	147
2	2	13	38	25	27		36	36	35	90	80	79	111	117	120	109	115	124	117	125	135	128	136
4	1	2	3	4	14		25	23	30	31	14	50	38	31	18	72	36	48	43	27	17	3	2
0	0	1	46	36	18		15	36	31	70	69	65	78	97	18	6	25	107	90	6	24	2	5
0	1	2	2	19	26		29	21	23	79	71	70	83	80	76	77	84	88	89	88	100	91	42
3	3	8	8	10	11		15	15	13	30	51	70	83	95	91	93	88	92	99	93	96	92	87
1	0	1	0	0	0		0	0	0	2	11	21	25	95	48	51	20	17	41	25	27	25	16
3	2	6	15	9	4		9	10	11	32	31	59	65	74	70	119	113	149	28	28	28	15	5
0	0	1	0	1	1		1	1	0	7	8	2	7	5	6	7	5	4	5	3	3	0	1
1	1	0	0	0	1		3	2	0	7	9	5	30	55	60	69	64	57	67	60	60	44	46
0	0	2	0	0	0		5	5	8	13	15	28	31	39	24	7	3	5	4	2	2	0	0
0	0	0	0	0	1		0	2	2	36	32	48	30	98	101	84	76	70	128	4	4	45	51
1	23	19	5	3	7		22	29	24	69	64	72	87	100	103	102	99	114	111	106	106	112	103
2	1	1	0	1	1		3	5	5	16	36	52	29	34	44	39	42	34	37	19	19	40	76
0	3	3	3	6	6		15	15	17	40	73	80	92	78	57	91	44	89	72	3	3	48	1
1	0	3	1	2	5		12	10	7	14	20	21	20	8	15	9	15	23	18	9	9	23	22
1	0	0	4	6	7		8	9	60	12	46	3	11	10	7	4	2	5	4	4	4	0	2
1	0	2	2	0	0		1	2	2	6	22	4	4	3	2	0	0	1	2	2	2	0	1
1	0	0	2	0	1		1	3	0	2	2	5	27	37	32	29	31	29	28	27	27	23	28
1	1	0	3	2	80		66	15	15	41	82	96	220	72	92	90	86	89	94	36	36	91	89
0	0	3	0	0	0		6	3	0	11	3	4	59	50	55	76	75	77	82	83	83	101	103
0	0	2	2	3	6		8	27	13	29	58	70	76	93	106	93	99	88	80	82	82	88	88
5	2	6	6	10	13		20	13	14	33	54	63	74	83	93	85	19	87	77	40	40	1	4
10	3	6	5	13	11		84	116	74	176	140	133	121	180	193	194	182	8	192	7	7	262	2
1	9	1	7	7	11		15	13	6	34	52	69	75	84	90	93	93	84	77	83	83	85	85
0	0	1	0	0	0		1	1	0	9	0	0	0	73	73	72	71	58	72	64	64	77	64
1	2	4	1	0	2		3	4	3	16	7	7	7	24	34	42	37	15	70	10	10	71	75
1	1	3	1	0	2		2	0	1	2	1	3	0	1	5	3	3	5	2	0	0	1	2
2	5	20	32	29	36	45	49	43	46	142	97	112	101	33	103	102	115	110	107	121	126	127	115
0	0	0	30	18	3	21	14	32	44	144	125	128	126	124	114	116	122	130	136	146	130	135	138
0	3	0	1	0	2	27	28	37	39	118	94	97	91	134	154	147	112	130	149	131	126	131	131
2	1	7	60	16	11	10	30	54	76	211	211	143	69	94	101	184	98	124	337	217	93	38	36
0	0	0	1	0	5	1	1	0	0	33	110	105	96	97	145	104	69	36	118	131	144	147	171
68	40	53	57	53	56	54	58	61	62	124	119	120	105	109	140	131	131	129	117	132	132	123	133
7	54	42	48	41	40	47	41	45	44	120	114	115	125	122	94	104	98	112	119	96	112	100	108
2	2	13	67	38	49	61	59	54	55	149	109	102	109	111	113	97	106	110	105	105	112	118	104
0	3	4	12	20	12	24	25	32	28	66	44	82	62	55	64	76	77	75	76	135	170	149	143
3	0	0	1	1	2	4	1	6	13	69	94	110	95	119	132	121	114	104	151	159	150	117	163
3	103	29	51	37	46	47	58	57	60	150	135	123	126	18	114	92	97	94	101	113	111	39	123
0	2	8	9	44	46	20	0	39	43	134	59	109	114	119	133	82	127	85	112	147	152	165	131
0	0	1	0	1	0	0	0	1	0	0	0	0	0	0	0	1	0	1	0	0	5	118	50
1	1	8	1	12	16	12	5	2	6	53	85	70	21	28	94	97	87	94	21	92	106	60	71
0	31	32	21	24	24	29	29	34	33	85	66	68	57	57	61	54	50	54	59	59	59	126	55
3	3	2	8	3	1	1	19	4	7	69	83	128	116	119	125	119	127	130	183	54	131	142	158
1	105	1	1	105	6	6	2	2	11	66	89	95	111	111	114	91	93	92	83	91	86	93	86
3	10	35	25	10	6	8	9	34	25	200	35	23	103	60	104	93	91	83	75	67	65	75	69
1	0	1	0	0	0	4	24	7	21	33	4	11	24	0	36	23	23	16	34	203	44	100	62
1	1	1	1	0	0	2	3	1	6	33	46	30	56	82	101	105	115	103	107	108	99	121	112
1	0	0	0	0	0	2	2	1	3	84	99	72	109	109	88	84	82	88	93	83	89	96	98
1	6	5	7	6	11	7	8	0	6	84	64	95	88	104	111	99	105	121	122	106	99	142	120
78	108	60	24	10	3	28	17	0	18	92	89	84	50	57	62	31	0	0	2	0	0	1	3
1	1	3	33	25	18	28	28	24	24	70	64	77	75	79	81	92	107	76	69	114	117	122	121
1	1	4	5	15	7	14	20	12	38	99	101	114	133	143	109	117	103	108	118	121	117	121	124
0	0	0	1	0	2	0	1	1	2	5	23	51	34	64	80	69	77	88	84	82	56	101	87
9	8	1	1	4	18	27	26	25	22	90	71	82	77	91	99	93	94	96	100	97	100	88	101
1	2	5	5	25	32	24	24	20	37	104	100	90	87	84	85	80	82	89	85	92	88	88	84
5	8	9	4	26	22	28	26	28	32	118	109	106	110	123	149	134	132	143	143	160	130	147	137
0	0	2	0	15	0	10	6	2	3	44	36	30	32	36	48	40	39	42	42	54	53	59	72
0	0	0	4	4	23	22	9	1	4	105	114	93	114	105	98	98	87	85	95	107	85	80	87
2	5	9	9	9	10	16	15	6	14	59	65	82	84	92	98	93	96	108	111	122	94	100	104
12	5	14	14	15	14	16	14	11	19	40	41	60	43	37	39	53	65	64	92	99	88	99	102
0	1	2	0	2	0	0	6	3	7	37	27	9	7	9	23	31	28	28	53	54	67	89	95
1	3	7	1	10	29	25	27	28	24	73	56	80	101	105	94	94	102	105	117	111	122	121	123
2	1	0	1	4	1	2	1	0	1	32	21	48	73	35	89	83	105	99	100	103	75	107	109
18	21	18	7	13	9	32	21	23	48	123	135	127	130	124	140	150	133	130	157	139	140	141	132
9	3	1	1	3	6	17	3	5	8	73	44	55	47	44	46	40	48	49	55	88	93	102	98
1	12	29	33	38	44	43	36	38	43	112	98	100	101	128	113	104	105	102	90	82	84	90	95
1	0	0	0	4	0	1	0	4	22	2	34	82	85	82	51	46	41	103	91	88	104	119	131
2	1	1	4	18	21	3	23	3	44	98	70	94	117	110	110	81	67	128	105	131	141	99	124
3	4	5	4	15	13	13	5	16	18	6	19	81	81	96	79	89	82	50	82	88	83	84	86
0	2	8	9	21	18	18	13	10	70	94	56	152	255	178	42	129	91	127	106	98	102	105	110
1	3	2	2	1	2	1	2	0	0	3	0	0	1	0	0	0	0	0	1	2	0	0	0
0	0	0	0	0	0	0	0	0	1	4	1	2	1	6	6	43	63	75	82	94	65	58	89
6	2	14	46	33	47	41	43	34	35	115	127	130	111	112	109	117	111	128	120	116	126	132	139
0	0	0	15	30	15	11	12	13	10	19	64	93	102	98	79	81	77	90	84	242	132	15	203
20	6	1	15	33	52	51	47	42	42	140	137	139	139	119	131	140	110	130	101	99	106	114	116
0	1	0	3	2	0	1	0	2	7	52	90	107	112	117	121	122	129	135	137	124	129	135	138
1	1	0	2	1	1	0	2	0	7	18	23	25	42	87	93	88	87	144	121	72	95	59	94
1	14	7	19	33	23	25	26	27	26	85	80	87	85	75	81	70	68	75	66	71	72	75	75
4	0	3	16	27	35	32	37	37	151	103	114	132	121	112	112	105	113	125	127	115	109	111	139
1	0	1	0	1	0	0	0	4	0	12	13	23	45	65	84	42	85	55	97	47	44	35	69
5	44	30	32	37	34	37	41	25	25	68	78	92	107	104	111	98	100	99	109	115	113	116	121
1	1	2	7	4	7	5	7	2	7	19	16	17	22	17	9	6	9	90	87	58	62	52	104
1	0	1	0	4	7	5	1	4	5	2	0	2	14	51	48	106	104	103	116	118	103	118	111
1	11	7	1	18	20	17	12	11	12	96	63	70	107	86	102	92	87	78	64	62	68	74	96
3	8	11	9	21	16	19	16	35	33	85	81	102	113	99	96	122	103	101	103	110	121	141	133
2	3	1	5	6	5	8	6	4	8	15	8	17	24	16	12	6	12	28	23	69	13	30	9
24	22	26	31	38	38	46	44	14	33	89	89	103	116	104	101	100	93	108	105	108	110	114	119
0	0	1	4	5	0	0	0	3	46	20	24	86	72	34	75	9	16	29	38	13	10	3	13
1	0	0	2	11	27	18	19	14	23	61	86	100	119	101	114	121	116	68	115	104	110	113	104
0	0	2	0	10	11	28	5	7	31	25	51	72	91	86	79	75	68	97	69	69	65	68	82
2	3	4	12	9	6	4	2	3	5	22	11	10	11	13	5	4	4	7	4	4	3	5	15
0	0	1	17	29	25	26	31	41	36	73	93	103	98	107	107	107	107	109	114	117	118	117	113
3	2	1	2	2	4	4	17	12	18	59	80	104	110	137	130	155	132	158	145	145	140	151	146
0	0	0	0	2	4	0	2	11	1	20	25	37	80	79	76	92	87	90	94	99	94	99	103
0	0	0	0	2	0	0	0	0	0	10	3	2	27	22	28	1	2	14	59	1	15	0	50
1	1	2	12	6	7	8	4	7	3	29	24	10	17	10	12	9	9	14	13	15	9	11	16
0	0	0	3	1	1	0	0	0	3	6	1	5	7	9	5	3	4	9	84	5	10	91	248
1	1	2	7	5	26	19	21	16	24	82	55	48	56	71	76	103	105	107	109	113	121	112	120
2	0	0	0	0	10	30	28	29	36	104	103	107	97	97	103	106	119	123	119	130	142	135	115
3	3	6	19	21	26	21	20	23	26	83	95	95	110	117	131	141	113	121	90	98	116	67	120
10	2	5	3	33	7	31	36	24	40	140	124	139	106	117	118	125	124	118	140	137	130	130	115
0	0	0	0	0	1	69	41	33	50	122	75	111	116	120	111	118	118	149	133	142	125	136	139
0	2	2	7	30	19	25	26	29	37	106	98	87	76	81	68	79	74	77	75	86	85	85	93
0	0	0	1	0	0	0	1	12	3	25	13	19	32	34	27	30	48	62	77	91	87	81	84
9	18	12	13	14	20	18	17	21	21	61	36	30	48	50	40	48	56	48	35	69	77	73	40
1	1	3	27	26	20	12	12	15	22	83	112	90	80	86	93	110	116	119	103	106	109	117	116
0	0	1	4	17	9	10	11	18	13	41	28	49	69	78	94	113	97	104	102	97	99	102	107
4	3	1	1	12	6	9	11	10	14	41	27	45	49	20	58	82	40	110	107	96	88	90	117
0	2	2	2	4	10	19	13	11	19	72	43	68	86	94	13	18	101	51	48	3	13	0	94
1	0	0	2	11	18	11	20	17	23	79	57	52	61	57	59	60	52	31	96	103	77	84	91
0	0	0	1	1	0	4	8	4	31	72	68	75	93	93	99	105	96	302	101	92	82	92	88
1	2	1	2	2	1	24	20	28	28	72	48	40	74	80	93	55	61	92	62	84	36	37	59
1	0	0	1	3	3	1	2	0	0	4	3	4	5	10	18	15	14	19	36	37	33	41	66
1	3	3	2	6	1	2	0	2	1	25	6	2	4	3	3	2	5	10	19	62	81	85	97
0	1	0	0	0	23	12	14	14	18	48	39	37	29	22	27	31	22	33	26	30	24	25	22
6	8	4	6	15	13	16	18	22	28	71	91	88	85	85	95	91	107	125	116	112	110	101	107
0	0	0	1	3	1	3	0	1	5	5	14	88	89	78	83	70	71	103	114	105	126	124	114
2	0	1	1	4	6	3	7	9	30	124	110	109	99	97	99	112	113	113	98	95	87	111	100

## Sheet: Panel B
sha	mean	standard deviation	standard error	lever
1	56.9197	33.7758	1.49415	active
2	61.746	32.8935	1.45512	active
3	59.1912	33.0708	1.46296	active
4	64.4775	33.656	1.48885	active
5	68.2348	32.7399	1.44833	active
6	69.7222	30.1163	1.33226	active
7	72.8747	28.5834	1.26445	active
8	73.96	31.1929	1.37989	active
9	75.9753	29.8796	1.32179	active
10	77.5701	29.3583	1.29873	active
1	43.0803	33.7758	1.49415	inactive
2	38.254	32.8935	1.45512	inactive
3	40.8088	33.0708	1.46296	inactive
4	35.5225	33.656	1.48885	inactive
5	31.7652	32.7399	1.44833	inactive
6	30.2778	30.1163	1.33226	inactive
7	27.1253	28.5834	1.26445	inactive
8	26.04	31.1929	1.37989	inactive
9	24.0247	29.8796	1.32179	inactive
10	22.4299	29.3583	1.29873	inactive
