# Supplementary material for: Large-scale characterization of cocaine addiction-like behaviors reveals that escalation of intake, aversion-resistant responding, and breaking-points are highly correlated measures of the same construct
Source: eLife. 2024 Nov 1;12:RP90422. doi: 10.7554/eLife.90422 (PMC11530236; doi:10.7554/eLife.90422)
Supplement: Figure 3—figure supplement 1—source data 1. — Motivation (A) and compulsivity (B) by the vulnerable and resilient populations and by sex. [file elife-90422-fig3-figsupp1-data1.xlsx]

## Sheet: Panel A
split	sex	pr	breakpoint	period
Vulnerable	F	10	32	ShA
Vulnerable	F	6	12	ShA
Resilient	F	9	25	ShA
Vulnerable	F	10	32	ShA
Vulnerable	F	1	1	ShA
Vulnerable	F	0	0	ShA
Vulnerable	F	0	0	ShA
Resilient	F	0	0	ShA
Vulnerable	F	0	0	ShA
Vulnerable	F	5	9	ShA
Vulnerable	F	11	40	ShA
Vulnerable	F	0	0	ShA
Vulnerable	F	1	1	ShA
Vulnerable	F	2	2	ShA
Vulnerable	F	2	2	ShA
Vulnerable	F	11	40	ShA
Vulnerable	F	5	9	ShA
Vulnerable	F	1	1	ShA
Vulnerable	F	4	6	ShA
Vulnerable	F	10	32	ShA
Vulnerable	F	15	95	ShA
Resilient	F	2	2	ShA
Resilient	M	2	2	ShA
Vulnerable	M	6	12	ShA
Vulnerable	M	4	6	ShA
Resilient	M	2	2	ShA
Vulnerable	M	4	6	ShA
Resilient	M	0	0	ShA
Vulnerable	M	4	6	ShA
Vulnerable	M	1	1	ShA
Vulnerable	M	0	0	ShA
Resilient	M	0	0	ShA
Resilient	M	5	9	ShA
Vulnerable	M	4	6	ShA
Resilient	M	4	6	ShA
Resilient	M	5	9	ShA
Resilient	M	0	0	ShA
Vulnerable	M	2	2	ShA
Vulnerable	M	5	9	ShA
Vulnerable	M	0	0	ShA
Vulnerable	M	0	0	ShA
Vulnerable	M	1	1	ShA
Resilient	M	0	0	ShA
Vulnerable	M	3	4	ShA
Vulnerable	F	2	2	ShA
Vulnerable	F	0	0	ShA
Vulnerable	F	5	9	ShA
Vulnerable	F	1	1	ShA
Vulnerable	F	3	4	ShA
Vulnerable	F	1	1	ShA
Vulnerable	F	6	12	ShA
Vulnerable	F	12	50	ShA
Vulnerable	F	12	50	ShA
Vulnerable	F	14	77	ShA
Vulnerable	F	8	20	ShA
Vulnerable	F	1	1	ShA
Vulnerable	F	2	2	ShA
Vulnerable	F	4	6	ShA
Vulnerable	F	10	32	ShA
Vulnerable	F	10	32	ShA
Vulnerable	F	11	40	ShA
Vulnerable	F	1	1	ShA
Vulnerable	F	10	32	ShA
Vulnerable	F	0	0	ShA
Vulnerable	F	0	0	ShA
Resilient	F	0	0	ShA
Vulnerable	M	1	1	ShA
Vulnerable	M	1	1	ShA
Vulnerable	M	1	1	ShA
Vulnerable	M	2	2	ShA
Vulnerable	M	10	32	ShA
Vulnerable	M	0	0	ShA
Vulnerable	M	2	2	ShA
Vulnerable	M	2	2	ShA
Vulnerable	M	0	0	ShA
Vulnerable	M	5	9	ShA
Vulnerable	M	0	0	ShA
Vulnerable	M	9	25	ShA
Vulnerable	M	2	2	ShA
Vulnerable	M	9	25	ShA
Vulnerable	M	6	12	ShA
Vulnerable	M	8	20	ShA
Vulnerable	M	3	4	ShA
Vulnerable	M	6	12	ShA
Vulnerable	M	1	1	ShA
Vulnerable	M	3	4	ShA
Resilient	M	0	0	ShA
Vulnerable	F	5	9	ShA
Vulnerable	F	7	15	ShA
Vulnerable	F	0	0	ShA
Vulnerable	F	9	25	ShA
Vulnerable	F	6	12	ShA
Vulnerable	F	6	12	ShA
Resilient	F	15	95	ShA
Vulnerable	F	7	15	ShA
Vulnerable	F	10	32	ShA
Vulnerable	F	11	40	ShA
Vulnerable	F	1	1	ShA
Vulnerable	F	2	2	ShA
Vulnerable	F	10	32	ShA
Resilient	F	0	0	ShA
Vulnerable	F	7	15	ShA
Vulnerable	F	0	0	ShA
Vulnerable	F	2	2	ShA
Vulnerable	F	10	32	ShA
Vulnerable	F	8	20	ShA
Vulnerable	F	9	25	ShA
Vulnerable	F	0	0	ShA
Vulnerable	F	0	0	ShA
Resilient	F	3	4	ShA
Vulnerable	M	0	0	ShA
Vulnerable	M	6	12	ShA
Vulnerable	M	6	12	ShA
Vulnerable	M	4	6	ShA
Vulnerable	M	0	0	ShA
Vulnerable	M	2	2	ShA
Vulnerable	M	10	32	ShA
Vulnerable	M	1	1	ShA
Vulnerable	M	2	2	ShA
Vulnerable	M	4	6	ShA
Vulnerable	M	1	1	ShA
Vulnerable	M	9	25	ShA
Vulnerable	M	10	32	ShA
Vulnerable	M	1	1	ShA
Vulnerable	M	0	0	ShA
Vulnerable	M	5	9	ShA
Resilient	M	2	2	ShA
Resilient	M	1	1	ShA
Resilient	M	0	0	ShA
Resilient	M	0	0	ShA
Vulnerable	M	3	4	ShA
Vulnerable	F	4	9	ShA
Vulnerable	F	0	0	ShA
Resilient	F	0	0	ShA
Vulnerable	F	7	15	ShA
Vulnerable	F	3	4	ShA
Vulnerable	F	13	62	ShA
Resilient	F	1	1	ShA
Vulnerable	F	7	15	ShA
Vulnerable	F	6	12	ShA
Vulnerable	F	0	0	ShA
Vulnerable	F	10	32	ShA
Vulnerable	F	1	1	ShA
Vulnerable	F	0	0	ShA
Vulnerable	F	1	1	ShA
Vulnerable	F	6	12	ShA
Vulnerable	F	6	12	ShA
Vulnerable	F	6	12	ShA
Resilient	F	1	1	ShA
Vulnerable	M	3	4	ShA
Resilient	M	1	1	ShA
Vulnerable	M	3	4	ShA
Vulnerable	M	4	9	ShA
Vulnerable	M	0	0	ShA
Vulnerable	M	7	15	ShA
Resilient	M	0	0	ShA
Resilient	M	3	4	ShA
Vulnerable	M	3	4	ShA
Resilient	M	2	2	ShA
Vulnerable	M	0	0	ShA
Vulnerable	M	4	6	ShA
Vulnerable	M	9	25	ShA
Vulnerable	M	1	1	ShA
Resilient	M	0	0	ShA
Vulnerable	M	6	12	ShA
Vulnerable	M	2	2	ShA
Vulnerable	M	5	9	ShA
Vulnerable	M	1	1	ShA
Vulnerable	M	1	1	ShA
Vulnerable	F	8	20	ShA
Resilient	F	1	1	ShA
Vulnerable	F	11	40	ShA
Resilient	F	2	2	ShA
Vulnerable	F	9	25	ShA
Vulnerable	F	10	32	ShA
Vulnerable	F	14	95	ShA
Resilient	F	1	1	ShA
Resilient	F	1	1	ShA
Vulnerable	F	10	32	ShA
Resilient	F	9	25	ShA
Vulnerable	F	2	2	ShA
Vulnerable	F	0	0	ShA
Vulnerable	F	5	9	ShA
Vulnerable	F	2	2	ShA
Vulnerable	F	2	2	ShA
Vulnerable	F	0	0	ShA
Resilient	F	8	20	ShA
Vulnerable	F	1	1	ShA
Vulnerable	F	2	2	ShA
Vulnerable	F	0	0	ShA
Vulnerable	F	2	2	ShA
Vulnerable	F	1	1	ShA
Resilient	M	0	0	ShA
Resilient	M	1	1	ShA
Resilient	M	0	0	ShA
Vulnerable	M	0	0	ShA
Vulnerable	M	1	1	ShA
Resilient	M	1	1	ShA
Vulnerable	M	4	6	ShA
Resilient	M	1	1	ShA
Vulnerable	M	7	15	ShA
Resilient	M	1	1	ShA
Vulnerable	M	7	15	ShA
Vulnerable	M	12	50	ShA
Resilient	M	0	0	ShA
Vulnerable	M	0	0	ShA
Resilient	M	0	0	ShA
Resilient	M	1		ShA
Resilient	M	0	0	ShA
Resilient	M	3	4	ShA
Vulnerable	M	1	1	ShA
Vulnerable	M	2	2	ShA
Resilient	M	1	1	ShA
Vulnerable	M	2	2	ShA
Resilient	M	2	2	ShA
Vulnerable	M	4	6	ShA
Vulnerable	M	1	1	ShA
Vulnerable	M	0	0	ShA
Vulnerable	M	6	12	ShA
Resilient	M	2	2	ShA
Vulnerable	M	2	2	ShA
Vulnerable	F	11	40	ShA
Vulnerable	F	2	2	ShA
Vulnerable	F	5	9	ShA
Vulnerable	F	2	2	ShA
Vulnerable	F	2	2	ShA
Resilient	F	0	0	ShA
Vulnerable	F	15	95	ShA
Vulnerable	F	12	50	ShA
Vulnerable	F	11	40	ShA
Vulnerable	F	0	0	ShA
Vulnerable	F	1	1	ShA
Vulnerable	F	0	0	ShA
Vulnerable	F	2	2	ShA
Vulnerable	F	0	0	ShA
Vulnerable	F	12	50	ShA
Vulnerable	F	0	0	ShA
Vulnerable	F	10	32	ShA
Vulnerable	F	11	40	ShA
Vulnerable	F	3	4	ShA
Vulnerable	F	6	12	ShA
Vulnerable	F	9	25	ShA
Vulnerable	F	7	15	ShA
Vulnerable	F	1	1	ShA
Vulnerable	F	8	20	ShA
Vulnerable	M	0	0	ShA
Resilient	M	2	2	ShA
Vulnerable	M	2	2	ShA
Vulnerable	M	0	0	ShA
Vulnerable	M	0	0	ShA
Resilient	M	1	1	ShA
Vulnerable	M	14	77	ShA
Vulnerable	M	7	15	ShA
Vulnerable	M	2	2	ShA
Vulnerable	M	5	9	ShA
Vulnerable	M	3	4	ShA
Vulnerable	M	0	0	ShA
Vulnerable	M	14	77	ShA
Vulnerable	M	4	6	ShA
Vulnerable	M	1	1	ShA
Resilient	M	1	1	ShA
Vulnerable	M	3	4	ShA
Vulnerable	M	8	20	ShA
Vulnerable	M	8	20	ShA
Vulnerable	M	0	0	ShA
Resilient	M	0	0	ShA
Vulnerable	M	12	50	ShA
Vulnerable	M	5	9	ShA
Vulnerable	M	2	2	ShA
Vulnerable	M	1	1	ShA
Resilient	M	2	2	ShA
Vulnerable	F	10		ShA
Vulnerable	F	6		ShA
Resilient	F	1		ShA
Vulnerable	F	2		ShA
Vulnerable	F	9		ShA
Vulnerable	F	0		ShA
Vulnerable	F	2		ShA
Vulnerable	F	2		ShA
Resilient	F	0		ShA
Vulnerable	F	8		ShA
Resilient	F	3		ShA
Vulnerable	F	12		ShA
Vulnerable	F	4		ShA
Resilient	F	3		ShA
Vulnerable	F	0		ShA
Vulnerable	F	11		ShA
Vulnerable	F	0		ShA
Vulnerable	F	5		ShA
Vulnerable	F	6		ShA
Vulnerable	F	2		ShA
Vulnerable	F	2		ShA
Vulnerable	F	10		ShA
Vulnerable	F	12		ShA
Vulnerable	F	11		ShA
Vulnerable	F	5		ShA
Vulnerable	F	6		ShA
Vulnerable	F	15		ShA
Vulnerable	F	7		ShA
Vulnerable	M	2		ShA
Resilient	M	2		ShA
Resilient	M	2		ShA
Resilient	M	0		ShA
Vulnerable	M	0		ShA
Vulnerable	M	12		ShA
Resilient	M	0		ShA
Vulnerable	M	2		ShA
Vulnerable	M	6		ShA
Vulnerable	M	9		ShA
Vulnerable	M	1		ShA
Vulnerable	M	7		ShA
Vulnerable	M	3		ShA
Resilient	M	1		ShA
Resilient	M	2		ShA
Vulnerable	M	4		ShA
Resilient	M	5		ShA
Vulnerable	M	4		ShA
Vulnerable	M	4		ShA
Vulnerable	M	6		ShA
Resilient	M	0		ShA
Vulnerable	M	5		ShA
Vulnerable	M	1		ShA
Vulnerable	M	6		ShA
Vulnerable	M	4		ShA
Vulnerable	M	10		ShA
Vulnerable	M	2		ShA
Vulnerable	F	4	9	ShA
Vulnerable	F	8	25	ShA
Vulnerable	F	1	1	ShA
Vulnerable	F	3	4	ShA
Vulnerable	F	0	0	ShA
Resilient	F	8	25	ShA
Vulnerable	F	6	15	ShA
Vulnerable	F	7	20	ShA
Resilient	F	6	15	ShA
Vulnerable	F	3	6	ShA
Vulnerable	F	2	4	ShA
Vulnerable	F	8	25	ShA
Resilient	F	1	1	ShA
Vulnerable	F	11	50	ShA
Resilient	F	1	1	ShA
Resilient	F	4	9	ShA
Resilient	F	6	15	ShA
Vulnerable	F	11	50	ShA
Vulnerable	F	6	15	ShA
Vulnerable	F	9	32	ShA
Vulnerable	F	14	95	ShA
Vulnerable	F	12	62	ShA
Vulnerable	F	7	20	ShA
Vulnerable	F	2	2	ShA
Vulnerable	M	5	12	ShA
Resilient	M	3	6	ShA
Resilient	M	2	2	ShA
Vulnerable	M	1	1	ShA
Vulnerable	M	8	25	ShA
Vulnerable	M	14	95	ShA
Vulnerable	M	5	12	ShA
Vulnerable	M	11	50	ShA
Vulnerable	M	1	1	ShA
Vulnerable	M	3	6	ShA
Vulnerable	M	3	6	ShA
Resilient	M	1	2	ShA
Vulnerable	M	6	15	ShA
Resilient	M	15	118	ShA
Vulnerable	M	8	25	ShA
Resilient	M	9	32	ShA
Vulnerable	M	4	9	ShA
Vulnerable	M	3	6	ShA
Vulnerable	M	1	1	ShA
Vulnerable	M	15	118	ShA
Resilient	M	0	0	ShA
Vulnerable	M	6	12	ShA
Vulnerable	M	0	0	ShA
Vulnerable	M	3	6	ShA
Vulnerable	M	7	20	ShA
Vulnerable	M	7	20	ShA
Vulnerable	M	6	15	ShA
Vulnerable	F	15	118	ShA
Vulnerable	F	16	145	ShA
Vulnerable	F	14	95	ShA
Vulnerable	F	12	62	ShA
Vulnerable	F	6	15	ShA
Vulnerable	F	3	4	ShA
Vulnerable	F	4	9	ShA
Vulnerable	F	11	50	ShA
Vulnerable	F	9	32	ShA
Resilient	F	3	6	ShA
Vulnerable	F	2	4	ShA
Vulnerable	F	11	50	ShA
Vulnerable	F	15	118	ShA
Vulnerable	F	9	32	ShA
Vulnerable	F	0	0	ShA
Resilient	F	1	1	ShA
Resilient	F	2	2	ShA
Vulnerable	F	7	20	ShA
Vulnerable	F	1	2	ShA
Vulnerable	F	7	20	ShA
Vulnerable	F	4	9	ShA
Vulnerable	F	8	25	ShA
Vulnerable	F	10	40	ShA
Resilient	F	2	4	ShA
Resilient	M	2	4	ShA
Resilient	M	0	0	ShA
Vulnerable	M	3	4	ShA
Vulnerable	M	12	62	ShA
Vulnerable	M	16	145	ShA
Vulnerable	M	1	2	ShA
Resilient	M	0	0	ShA
Vulnerable	M	3	6	ShA
Vulnerable	M	13	77	ShA
Vulnerable	M	11	50	ShA
Vulnerable	M	0	0	ShA
Resilient	M	1	2	ShA
Vulnerable	M	2	4	ShA
Resilient	M	0	0	ShA
Vulnerable	M	7	20	ShA
Vulnerable	M	2	4	ShA
Vulnerable	M	11	50	ShA
Vulnerable	M	4	9	ShA
Vulnerable	M	10	40	ShA
Resilient	M	0	0	ShA
Vulnerable	M	9	32	ShA
Vulnerable	M	8	25	ShA
Vulnerable	M	4	9	ShA
Vulnerable	M	6	15	ShA
Resilient	M	0	0	ShA
Vulnerable	M	4	9	ShA
Vulnerable	F	9	32	ShA
Vulnerable	F	1	1	ShA
Vulnerable	F	0	0	ShA
Vulnerable	F	1	1	ShA
Vulnerable	F	5	9	ShA
Vulnerable	F	0	0	ShA
Resilient	F	0	0	ShA
Vulnerable	F	0	0	ShA
Vulnerable	F	4	9	ShA
Resilient	F	0	0	ShA
Vulnerable	F	6	15	ShA
Vulnerable	F	0	0	ShA
Resilient	F	2	4	ShA
Vulnerable	F	0	0	ShA
Vulnerable	F	0	0	ShA
Vulnerable	F	3	4	ShA
Vulnerable	F	12	62	ShA
Vulnerable	F	6	15	ShA
Vulnerable	F	3	6	ShA
Vulnerable	F	10	40	ShA
Resilient	F	5	12	ShA
Resilient	F	2	4	ShA
Vulnerable	F	4	9	ShA
Vulnerable	M	4	9	ShA
Resilient	M	1	1	ShA
Resilient	M	2	4	ShA
Resilient	M	0	0	ShA
Resilient	M	1	1	ShA
Resilient	M	3	4	ShA
Resilient	M	0	0	ShA
Vulnerable	M	5	12	ShA
Resilient	M	2	2	ShA
Resilient	M	5	12	ShA
Resilient	M	5	12	ShA
Resilient	M	1	1	ShA
Resilient	M	0	0	ShA
Resilient	M	1	1	ShA
Vulnerable	M	6	15	ShA
Vulnerable	M	0	0	ShA
Vulnerable	M	4	9	ShA
Resilient	M	4	9	ShA
Vulnerable	M	8	25	ShA
Vulnerable	M	3	6	ShA
Vulnerable	M	0	0	ShA
Vulnerable	M	1	1	ShA
Resilient	M	0	0	ShA
Vulnerable	F	11	50	ShA
Vulnerable	F	7	20	ShA
Vulnerable	F	11	50	ShA
Vulnerable	F	3	6	ShA
Vulnerable	F	1	1	ShA
Vulnerable	F	10	40	ShA
Vulnerable	F	11	50	ShA
Vulnerable	F	9	32	ShA
Vulnerable	F	4	9	ShA
Vulnerable	F	3	6	ShA
Vulnerable	F	10	40	ShA
Vulnerable	F	4	9	ShA
Vulnerable	F	0	0	ShA
Vulnerable	F	2	2	ShA
Vulnerable	F	14	95	ShA
Vulnerable	F	3	6	ShA
Vulnerable	F	2	2	ShA
Vulnerable	F	5	12	ShA
Vulnerable	F	2	4	ShA
Vulnerable	M	5	12	ShA
Vulnerable	M	0	0	ShA
Vulnerable	M	0	0	ShA
Resilient	M	4	9	ShA
Vulnerable	M	4	6	ShA
Vulnerable	M	7	20	ShA
Vulnerable	M	0	0	ShA
Vulnerable	M	3	6	ShA
Vulnerable	M	11	50	ShA
Vulnerable	M	7	20	ShA
Vulnerable	M	2	2	ShA
Vulnerable	M	2	2	ShA
Vulnerable	M	8	25	ShA
Vulnerable	M	6	15	ShA
Vulnerable	M	1	2	ShA
Vulnerable	M	4	9	ShA
Vulnerable	M	1	1	ShA
Vulnerable	M	8	25	ShA
Vulnerable	M	4	6	ShA
Vulnerable	M	13	77	ShA
Vulnerable	F	3		ShA
Vulnerable	F	1		ShA
Vulnerable	F	3		ShA
Vulnerable	F	6		ShA
Resilient	F	0		ShA
Vulnerable	F	1		ShA
Vulnerable	F	7		ShA
Vulnerable	F	3		ShA
Vulnerable	F	10		ShA
Vulnerable	F	2		ShA
Vulnerable	F	2		ShA
Vulnerable	F	13		ShA
Vulnerable	F	7		ShA
Resilient	F	1		ShA
Vulnerable	F	10		ShA
Vulnerable	F	2		ShA
Vulnerable	F	1		ShA
Vulnerable	F	5		ShA
Vulnerable	F	9		ShA
Resilient	F	2		ShA
Vulnerable	F	13		ShA
Resilient	F	3		ShA
Vulnerable	F	7		ShA
Vulnerable	M	2		ShA
Resilient	M	1		ShA
Vulnerable	M	10		ShA
Vulnerable	M	5		ShA
Vulnerable	M	0		ShA
Resilient	M	0		ShA
Resilient	M	2		ShA
Vulnerable	M	0		ShA
Vulnerable	M	5		ShA
Vulnerable	M	11		ShA
Vulnerable	M	9		ShA
Vulnerable	M	9		ShA
Vulnerable	M	9		ShA
Vulnerable	M	8		ShA
Vulnerable	M	3		ShA
Vulnerable	M	7		ShA
Vulnerable	M	9		ShA
Vulnerable	M	4		ShA
Vulnerable	M	3		ShA
Vulnerable	M	6		ShA
Vulnerable	M	2		ShA
Resilient	M	7		ShA
Resilient	M	0		ShA
Vulnerable	M	2		ShA
Resilient	M	10		ShA
Vulnerable	M	9		ShA
Vulnerable	M	3		ShA
Vulnerable	M	8		ShA
Vulnerable	F	13	62	LgA
Vulnerable	F	12	50	LgA
Resilient	F	9	25	LgA
Vulnerable	F	10	32	LgA
Vulnerable	F	9	25	LgA
Vulnerable	F	12	50	LgA
Vulnerable	F	8	20	LgA
Resilient	F	0	0	LgA
Vulnerable	F	4	6	LgA
Vulnerable	F	15	95	LgA
Vulnerable	F	17	145	LgA
Vulnerable	F	11	40	LgA
Vulnerable	F	11	40	LgA
Vulnerable	F	4	6	LgA
Vulnerable	F	12	50	LgA
Vulnerable	F	14	77	LgA
Vulnerable	F	10	32	LgA
Vulnerable	F	13	62	LgA
Vulnerable	F	15	95	LgA
Vulnerable	F	12	50	LgA
Resilient	F	4	6	LgA
Resilient	M	5	9	LgA
Vulnerable	M	13	62	LgA
Vulnerable	M	13	62	LgA
Resilient	M	0	0	LgA
Vulnerable	M	4	6	LgA
Resilient	M	0	0	LgA
Vulnerable	M	15	95	LgA
Vulnerable	M	12	50	LgA
Vulnerable	M	12	50	LgA
Resilient	M	0	0	LgA
Resilient	M	1	1	LgA
Vulnerable	M	12	50	LgA
Resilient	M	2	2	LgA
Resilient	M	8	20	LgA
Resilient	M	2	2	LgA
Vulnerable	M	11	40	LgA
Vulnerable	M	16	118	LgA
Vulnerable	M	12	50	LgA
Vulnerable	M	9	25	LgA
Vulnerable	M	11	40	LgA
Resilient	M	6	12	LgA
Vulnerable	M	12	50	LgA
Vulnerable	F	11	40	LgA
Vulnerable	F	8	20	LgA
Vulnerable	F	17	145	LgA
Vulnerable	F	6	12	LgA
Vulnerable	F	10	50	LgA
Vulnerable	F	14	77	LgA
Vulnerable	F	10	50	LgA
Vulnerable	F	10	50	LgA
Vulnerable	F	15	95	LgA
Vulnerable	F	16	118	LgA
Vulnerable	F	6	12	LgA
Vulnerable	F	13	62	LgA
Vulnerable	F	13	62	LgA
Vulnerable	F	14	77	LgA
Vulnerable	F	9	25	LgA
Vulnerable	F	13	62	LgA
Vulnerable	F	12	50	LgA
Vulnerable	F	16	118	LgA
Vulnerable	F	12	50	LgA
Vulnerable	F	14	77	LgA
Vulnerable	F	0	0	LgA
Resilient	F	2	2	LgA
Vulnerable	M	11	40	LgA
Vulnerable	M	11	40	LgA
Vulnerable	M	12	50	LgA
Vulnerable	M	1	1	LgA
Vulnerable	M	16	118	LgA
Vulnerable	M	15	95	LgA
Vulnerable	M	11	40	LgA
Vulnerable	M	0	0	LgA
Vulnerable	M	13	62	LgA
Vulnerable	M	7	15	LgA
Vulnerable	M	12	50	LgA
Vulnerable	M	9	25	LgA
Vulnerable	M	11	40	LgA
Vulnerable	M	3	4	LgA
Vulnerable	M	12	50	LgA
Vulnerable	M	9	25	LgA
Vulnerable	M	12	50	LgA
Vulnerable	M	12	50	LgA
Vulnerable	M	11	40	LgA
Resilient	M	1	1	LgA
Vulnerable	F	15	95	LgA
Vulnerable	F	11	40	LgA
Vulnerable	F	10	32	LgA
Vulnerable	F	12	50	LgA
Vulnerable	F	11	40	LgA
Vulnerable	F	17	145	LgA
Resilient	F	16	118	LgA
Vulnerable	F	5	9	LgA
Vulnerable	F	12	50	LgA
Vulnerable	F	13	62	LgA
Vulnerable	F	13	62	LgA
Vulnerable	F	10	32	LgA
Vulnerable	F	12	50	LgA
Resilient	F	1	1	LgA
Vulnerable	F	10	32	LgA
Vulnerable	F	8	20	LgA
Vulnerable	F	1	1	LgA
Vulnerable	F	13	62	LgA
Vulnerable	F	4	6	LgA
Vulnerable	F	12	50	LgA
Vulnerable	F	11	40	LgA
Vulnerable	F	14	77	LgA
Resilient	F	7	15	LgA
Vulnerable	M	10	32	LgA
Vulnerable	M	11	40	LgA
Vulnerable	M	13	62	LgA
Vulnerable	M	0	0	LgA
Vulnerable	M	9	25	LgA
Vulnerable	M	1	1	LgA
Vulnerable	M	11	40	LgA
Vulnerable	M	0	0	LgA
Vulnerable	M	0	0	LgA
Vulnerable	M	9	25	LgA
Vulnerable	M	3	4	LgA
Vulnerable	M	15	95	LgA
Vulnerable	M	8	20	LgA
Vulnerable	M	10	32	LgA
Vulnerable	M	13	62	LgA
Vulnerable	M	14	77	LgA
Resilient	M	2	2	LgA
Resilient	M	1	1	LgA
Resilient	M	0	0	LgA
Resilient	M	0	0	LgA
Vulnerable	M	9	25	LgA
Vulnerable	F	12	50	LgA
Vulnerable	F	14	77	LgA
Resilient	F	0	0	LgA
Vulnerable	F	12	50	LgA
Vulnerable	F	10	32	LgA
Vulnerable	F	12	50	LgA
Resilient	F	2	2	LgA
Vulnerable	F	16	118	LgA
Vulnerable	F	14	77	LgA
Vulnerable	F	9	25	LgA
Vulnerable	F	16	118	LgA
Vulnerable	F	14	77	LgA
Vulnerable	F	12	50	LgA
Vulnerable	F	10	32	LgA
Vulnerable	F	12	50	LgA
Vulnerable	F	11	40	LgA
Vulnerable	F	5	9	LgA
Resilient	F	13	62	LgA
Vulnerable	M	15	95	LgA
Resilient	M	0	0	LgA
Vulnerable	M	11	40	LgA
Vulnerable	M	9	25	LgA
Vulnerable	M	11	40	LgA
Vulnerable	M	4	6	LgA
Resilient	M	1	1	LgA
Resilient	M	6	12	LgA
Vulnerable	M	5	9	LgA
Resilient	M	0	0	LgA
Vulnerable	M	3	4	LgA
Vulnerable	M	13	62	LgA
Vulnerable	M	7	15	LgA
Vulnerable	M	12	50	LgA
Resilient	M	1	1	LgA
Vulnerable	M	13	62	LgA
Vulnerable	M	8	20	LgA
Resilient	M	2	2	LgA
Vulnerable	M	13	62	LgA
Vulnerable	M	11	40	LgA
Vulnerable	M	8	20	LgA
Vulnerable	F	13	62	LgA
Resilient	F	1	1	LgA
Vulnerable	F	16	118	LgA
Resilient	F	5	9	LgA
Vulnerable	F	11	40	LgA
Vulnerable	F	10	32	LgA
Vulnerable	F	10	32	LgA
Resilient	F	0	0	LgA
Resilient	F	0	0	LgA
Vulnerable	F	10	32	LgA
Resilient	F	0	0	LgA
Vulnerable	F	9	25	LgA
Vulnerable	F	8	20	LgA
Vulnerable	F	12	50	LgA
Vulnerable	F	13	62	LgA
Vulnerable	F	11	40	LgA
Resilient	F	4	6	LgA
Vulnerable	F	11	40	LgA
Vulnerable	F	6	12	LgA
Vulnerable	F	12	50	LgA
Vulnerable	F	12	50	LgA
Vulnerable	F	11	40	LgA
Vulnerable	F	11	40	LgA
Resilient	M	1	1	LgA
Resilient	M	0	0	LgA
Resilient	M	0	0	LgA
Vulnerable	M	7	15	LgA
Vulnerable	M	11	40	LgA
Resilient	M	16	118	LgA
Vulnerable	M	7	15	LgA
Resilient	M	4	6	LgA
Vulnerable	M	12	50	LgA
Resilient	M	1	1	LgA
Vulnerable	M	14	77	LgA
Vulnerable	M	12	50	LgA
Resilient	M	0	0	LgA
Vulnerable	M	8	20	LgA
Resilient	M	0	0	LgA
Resilient	M	2	2	LgA
Resilient	M	0	0	LgA
Resilient	M	2	2	LgA
Vulnerable	M	12	50	LgA
Vulnerable	M	10	32	LgA
Resilient	M	3	4	LgA
Vulnerable	M	11	40	LgA
Resilient	M	2	2	LgA
Vulnerable	M	9	25	LgA
Vulnerable	M	8	20	LgA
Vulnerable	M	10	32	LgA
Vulnerable	M	10	32	LgA
Resilient	M	0	0	LgA
Vulnerable	M	10	32	LgA
Vulnerable	F	19	219	LgA
Vulnerable	F	12	50	LgA
Vulnerable	F	6	12	LgA
Vulnerable	F	3	4	LgA
Vulnerable	F	8	20	LgA
Resilient	F	1	1	LgA
Vulnerable	F	18	178	LgA
Vulnerable	F	14	77	LgA
Vulnerable	F	10	32	LgA
Vulnerable	F	9	25	LgA
Vulnerable	F	5	9	LgA
Vulnerable	F	13	62	LgA
Vulnerable	F	12	50	LgA
Vulnerable	F	1	1	LgA
Vulnerable	F	15	95	LgA
Vulnerable	F	3	4	LgA
Vulnerable	F	11	40	LgA
Vulnerable	F	13	62	LgA
Vulnerable	F	1	1	LgA
Vulnerable	F	12	50	LgA
Vulnerable	F	1	1	LgA
Vulnerable	F	10	32	LgA
Vulnerable	F	15	95	LgA
Vulnerable	F	18	178	LgA
Vulnerable	M	19	219	LgA
Resilient	M	2	2	LgA
Vulnerable	M	10	32	LgA
Vulnerable	M	13	62	LgA
Vulnerable	M	15	95	LgA
Resilient	M	7	15	LgA
Vulnerable	M	12	50	LgA
Vulnerable	M	11	40	LgA
Vulnerable	M	8	20	LgA
Vulnerable	M	14	77	LgA
Vulnerable	M	14	77	LgA
Vulnerable	M	2	2	LgA
Vulnerable	M	16	118	LgA
Vulnerable	M	14	77	LgA
Vulnerable	M	16	118	LgA
Resilient	M	0	0	LgA
Vulnerable	M	9	25	LgA
Vulnerable	M	13	62	LgA
Vulnerable	M	13	62	LgA
Vulnerable	M	14	77	LgA
Resilient	M	0	0	LgA
Vulnerable	M	12	50	LgA
Vulnerable	M	12	50	LgA
Vulnerable	M	9	25	LgA
Vulnerable	M	11	40	LgA
Resilient	M	1	1	LgA
Vulnerable	F	13	62	LgA
Vulnerable	F	0	0	LgA
Resilient	F	9	25	LgA
Vulnerable	F	4	6	LgA
Vulnerable	F	4	6	LgA
Vulnerable	F	2	2	LgA
Vulnerable	F	1	1	LgA
Vulnerable	F	10	32	LgA
Resilient	F	14	77	LgA
Vulnerable	F	13	62	LgA
Resilient	F	9	25	LgA
Vulnerable	F	12	32	LgA
Vulnerable	F	2	2	LgA
Resilient	F	11	40	LgA
Vulnerable	F	15	95	LgA
Vulnerable	F	13	62	LgA
Vulnerable	F	10	32	LgA
Vulnerable	F	16	118	LgA
Vulnerable	F	5	9	LgA
Vulnerable	F	1	1	LgA
Vulnerable	F	12	50	LgA
Vulnerable	F	11	62	LgA
Vulnerable	F	12	77	LgA
Vulnerable	F	13	95	LgA
Vulnerable	F	14	118	LgA
Vulnerable	F	17	145	LgA
Vulnerable	F	14	77	LgA
Vulnerable	F	0	0	LgA
Vulnerable	M	1	1	LgA
Resilient	M	1	1	LgA
Resilient	M	0	0	LgA
Resilient	M	1	1	LgA
Vulnerable	M	0	0	LgA
Vulnerable	M	17	145	LgA
Resilient	M	0	0	LgA
Vulnerable	M	10	32	LgA
Vulnerable	M	0	0	LgA
Vulnerable	M	3	4	LgA
Vulnerable	M	0	0	LgA
Vulnerable	M	3	4	LgA
Vulnerable	M	9	25	LgA
Resilient	M	2	2	LgA
Resilient	M	2	2	LgA
Vulnerable	M	14	77	LgA
Resilient	M	6	12	LgA
Vulnerable	M	8	20	LgA
Vulnerable	M	8	20	LgA
Vulnerable	M	2	2	LgA
Resilient	M	1	1	LgA
Vulnerable	M	12	50	LgA
Vulnerable	M	3	4	LgA
Vulnerable	M	2	2	LgA
Vulnerable	M	15	95	LgA
Vulnerable	M	16	118	LgA
Vulnerable	M	7	15	LgA
Vulnerable	F	9	32	LgA
Vulnerable	F	12	62	LgA
Vulnerable	F	14	95	LgA
Vulnerable	F	12	62	LgA
Vulnerable	F	23	603	LgA
Resilient	F	3	6	LgA
Vulnerable	F	13	77	LgA
Vulnerable	F	15	118	LgA
Resilient	F	0	0	LgA
Vulnerable	F	9	32	LgA
Vulnerable	F	12	62	LgA
Vulnerable	F	10	40	LgA
Resilient	F	7	20	LgA
Vulnerable	F	13	77	LgA
Resilient	F	0	0	LgA
Resilient	F	2	2	LgA
Resilient	F	0	0	LgA
Vulnerable	F	8	25	LgA
Vulnerable	F	15	118	LgA
Vulnerable	F	9	32	LgA
Vulnerable	F	9	32	LgA
Vulnerable	F	12	62	LgA
Vulnerable	F	14	95	LgA
Vulnerable	F	7	20	LgA
Vulnerable	M	2	4	LgA
Resilient	M	1	2	LgA
Resilient	M	2	2	LgA
Vulnerable	M	10	40	LgA
Vulnerable	M	15	118	LgA
Vulnerable	M	12	62	LgA
Vulnerable	M	9	32	LgA
Vulnerable	M	5	12	LgA
Vulnerable	M	5	12	LgA
Vulnerable	M	12	62	LgA
Vulnerable	M	9	32	LgA
Resilient	M	1	1	LgA
Vulnerable	M	10	40	LgA
Resilient	M	7	20	LgA
Vulnerable	M	7	20	LgA
Resilient	M	3	6	LgA
Vulnerable	M	5	12	LgA
Vulnerable	M	11	50	LgA
Vulnerable	M	8	25	LgA
Vulnerable	M	14	95	LgA
Resilient	M	0	0	LgA
Vulnerable	M	13	77	LgA
Vulnerable	M	12	62	LgA
Vulnerable	M	13	77	LgA
Vulnerable	M	12	50	LgA
Vulnerable	M	14	95	LgA
Vulnerable	M	1	2	LgA
Vulnerable	F	13	77	LgA
Vulnerable	F	17	178	LgA
Vulnerable	F	17	178	LgA
Vulnerable	F	14	95	LgA
Vulnerable	F	8	25	LgA
Vulnerable	F	3	6	LgA
Vulnerable	F	15	118	LgA
Vulnerable	F	14	95	LgA
Vulnerable	F	11	50	LgA
Resilient	F	0	0	LgA
Vulnerable	F	13	77	LgA
Vulnerable	F	14	95	LgA
Vulnerable	F	22	492	LgA
Vulnerable	F	17	178	LgA
Vulnerable	F	2	4	LgA
Resilient	F	4	9	LgA
Resilient	F	2	4	LgA
Vulnerable	F	6	15	LgA
Vulnerable	F	10	40	LgA
Vulnerable	F	10	40	LgA
Vulnerable	F	1	1	LgA
Vulnerable	F	13	77	LgA
Vulnerable	F	10	40	LgA
Resilient	F	0	0	LgA
Resilient	M	3	4	LgA
Resilient	M	0	0	LgA
Vulnerable	M	13	77	LgA
Vulnerable	M	12	62	LgA
Vulnerable	M	17	178	LgA
Vulnerable	M	8	25	LgA
Resilient	M	12	62	LgA
Vulnerable	M	12	62	LgA
Vulnerable	M	13	77	LgA
Vulnerable	M	14	95	LgA
Vulnerable	M	0	0	LgA
Resilient	M	1	1	LgA
Vulnerable	M	10	40	LgA
Resilient	M	2	4	LgA
Vulnerable	M	12	62	LgA
Vulnerable	M	11	50	LgA
Vulnerable	M	11	50	LgA
Vulnerable	M	9	32	LgA
Vulnerable	M	11	50	LgA
Resilient	M	0	0	LgA
Vulnerable	M	10	40	LgA
Vulnerable	M	24	737	LgA
Vulnerable	M	16	145	LgA
Vulnerable	M	14	95	LgA
Resilient	M	1	2	LgA
Vulnerable	M	9	32	LgA
Vulnerable	F	10	40	LgA
Vulnerable	F	13	77	LgA
Vulnerable	F	12	62	LgA
Vulnerable	F	0	0	LgA
Vulnerable	F	13	77	LgA
Vulnerable	F	20	328	LgA
Resilient	F	6	15	LgA
Vulnerable	F	4	9	LgA
Vulnerable	F	14	95	LgA
Resilient	F	0	0	LgA
Vulnerable	F	11	50	LgA
Vulnerable	F	9	32	LgA
Vulnerable	F	18	219	LgA
Resilient	F	1	1	LgA
Vulnerable	F	14	95	LgA
Vulnerable	F	0	0	LgA
Vulnerable	F	9	32	LgA
Vulnerable	F	8	25	LgA
Vulnerable	F	14	95	LgA
Vulnerable	F	6	15	LgA
Vulnerable	F	10	40	LgA
Resilient	F	0	0	LgA
Resilient	F	0	0	LgA
Vulnerable	F	5	12	LgA
Vulnerable	M	13	77	LgA
Resilient	M	3	6	LgA
Resilient	M	1	1	LgA
Resilient	M	0	0	LgA
Resilient	M	0	0	LgA
Resilient	M	2	2	LgA
Resilient	M	1	1	LgA
Vulnerable	M	14	95	LgA
Resilient	M	11	50	LgA
Resilient	M	2	4	LgA
Resilient	M	2	4	LgA
Resilient	M	1	1	LgA
Resilient	M	0	0	LgA
Resilient	M	0	0	LgA
Vulnerable	M	1	2	LgA
Vulnerable	M	13	77	LgA
Vulnerable	M	5	12	LgA
Resilient	M	0	0	LgA
Vulnerable	M	1	1	LgA
Vulnerable	M	12	62	LgA
Vulnerable	M	8	25	LgA
Vulnerable	M	7	20	LgA
Resilient	M	0	0	LgA
Vulnerable	F	13	77	LgA
Vulnerable	F	8	25	LgA
Vulnerable	F	13	77	LgA
Vulnerable	F	0	0	LgA
Vulnerable	F	12	62	LgA
Vulnerable	F	12	62	LgA
Vulnerable	F	12	62	LgA
Vulnerable	F	9	32	LgA
Vulnerable	F	4	9	LgA
Vulnerable	F	5	12	LgA
Vulnerable	F	13	77	LgA
Vulnerable	F	12	62	LgA
Vulnerable	F	5	12	LgA
Vulnerable	F	3	6	LgA
Vulnerable	F	17	178	LgA
Vulnerable	F	8	25	LgA
Vulnerable	F	12	62	LgA
Vulnerable	F	6	15	LgA
Vulnerable	F	0	0	LgA
Vulnerable	M	19	268	LgA
Vulnerable	M	16	145	LgA
Vulnerable	M	15	118	LgA
Resilient	M	1	1	LgA
Vulnerable	M	16	145	LgA
Vulnerable	M	7	20	LgA
Vulnerable	M	0	0	LgA
Vulnerable	M	14	95	LgA
Vulnerable	M	16	145	LgA
Vulnerable	M	13	77	LgA
Vulnerable	M	7	20	LgA
Vulnerable	M	0	0	LgA
Vulnerable	M	9	32	LgA
Vulnerable	M	15	118	LgA
Vulnerable	M	7	20	LgA
Vulnerable	M	14	95	LgA
Vulnerable	M	10	40	LgA
Vulnerable	M	10	40	LgA
Vulnerable	M	14	95	LgA
Vulnerable	M	13	77	LgA
Vulnerable	F	13		LgA
Vulnerable	F	17		LgA
Vulnerable	F	10		LgA
Vulnerable	F	4		LgA
Resilient	F	0		LgA
Vulnerable	F	7		LgA
Vulnerable	F	6		LgA
Vulnerable	F	4		LgA
Vulnerable	F	13		LgA
Vulnerable	F	11		LgA
Vulnerable	F	0		LgA
Vulnerable	F	12		LgA
Vulnerable	F	9		LgA
Resilient	F	0		LgA
Vulnerable	F	10		LgA
Vulnerable	F	7		LgA
Vulnerable	F	13		LgA
Vulnerable	F	11		LgA
Vulnerable	F	6		LgA
Resilient	F	4		LgA
Vulnerable	F	16		LgA
Resilient	F	1		LgA
Vulnerable	F	16		LgA
Vulnerable	M	2		LgA
Resilient	M	2		LgA
Vulnerable	M	13		LgA
Vulnerable	M	11		LgA
Vulnerable	M	17		LgA
Resilient	M	0		LgA
Resilient	M	1		LgA
Vulnerable	M	12		LgA
Vulnerable	M	13		LgA
Vulnerable	M	10		LgA
Vulnerable	M	8		LgA
Vulnerable	M	13		LgA
Vulnerable	M	17		LgA
Vulnerable	M	1		LgA
Vulnerable	M	9		LgA
Vulnerable	M	5		LgA
Vulnerable	M	12		LgA
Vulnerable	M	7		LgA
Vulnerable	M	11		LgA
Resilient	M	1		LgA
Vulnerable	M	0		LgA
Vulnerable	M	9		LgA
Resilient	M	0		LgA
Resilient	M	3		LgA
Vulnerable	M	0		LgA
Resilient	M	2		LgA
Vulnerable	M	15		LgA
Vulnerable	M	9		LgA
Vulnerable	M	6		LgA

## Sheet: Panel B
split	sex	shock
Vulnerable	F	26
Vulnerable	F	26
Resilient	F	4
Vulnerable	F	15
Vulnerable	F	3
Vulnerable	F	14
Vulnerable	F	10
Resilient	F	0
Vulnerable	F	16
Vulnerable	F	11
Vulnerable	F	27
Vulnerable	F	18
Vulnerable	F	20
Vulnerable	F	5
Vulnerable	F	34
Vulnerable	F	11
Vulnerable	F	22
Vulnerable	F	7
Vulnerable	F	20
Vulnerable	F	19
Resilient	F	2
Resilient	M	4
Vulnerable	M	3
Vulnerable	M	3
Resilient	M	1
Vulnerable	M	1
Resilient	M	7
Vulnerable	M	13
Vulnerable	M	1
Vulnerable	M	1
Resilient	M	9
Resilient	M	2
Vulnerable	M	25
Resilient	M	2
Resilient	M	6
Resilient	M	5
Vulnerable	M	1
Vulnerable	M	16
Vulnerable	M	3
Vulnerable	M	26
Vulnerable	M	2
Resilient	M	2
Vulnerable	M	4
Vulnerable	F	12
Vulnerable	F	18
Vulnerable	F	13
Vulnerable	F	21
Vulnerable	F	21
Vulnerable	F	12
Vulnerable	F	17
Vulnerable	F	23
Vulnerable	F	27
Vulnerable	F	21
Vulnerable	F	7
Vulnerable	F	30
Vulnerable	F	14
Vulnerable	F	8
Vulnerable	F	8
Vulnerable	F	15
Vulnerable	F	23
Vulnerable	F	17
Vulnerable	F	32
Vulnerable	F	42
Vulnerable	F	8
Resilient	F	14
Vulnerable	M	6
Vulnerable	M	16
Vulnerable	M	5
Vulnerable	M	1
Vulnerable	M	11
Vulnerable	M	0
Vulnerable	M	3
Vulnerable	M	2
Vulnerable	M	12
Vulnerable	M	4
Vulnerable	M	11
Vulnerable	M	4
Vulnerable	M	10
Vulnerable	M	1
Vulnerable	M	17
Vulnerable	M	19
Vulnerable	M	8
Vulnerable	M	22
Vulnerable	M	2
Resilient	M	0
Vulnerable	F	14
Vulnerable	F	6
Vulnerable	F	0
Vulnerable	F	20
Vulnerable	F	21
Vulnerable	F	11
Resilient	F	8
Vulnerable	F	17
Vulnerable	F	23
Vulnerable	F	14
Vulnerable	F	16
Vulnerable	F	4
Vulnerable	F	19
Resilient	F	12
Vulnerable	F	11
Vulnerable	F	9
Vulnerable	F	7
Vulnerable	F	20
Vulnerable	F	17
Vulnerable	F	22
Vulnerable	F	31
Vulnerable	F	27
Resilient	F	9
Vulnerable	M	2
Vulnerable	M	2
Vulnerable	M	5
Vulnerable	M	0
Vulnerable	M	1
Vulnerable	M	1
Vulnerable	M	21
Vulnerable	M	0
Vulnerable	M	13
Vulnerable	M	16
Vulnerable	M	2
Vulnerable	M	4
Vulnerable	M	4
Vulnerable	M	15
Vulnerable	M	22
Vulnerable	M	22
Resilient	M	2
Resilient	M	5
Resilient	M	1
Resilient	M	4
Vulnerable	M	21
Vulnerable	F	21
Vulnerable	F	23
Resilient	F	0
Vulnerable	F	21
Vulnerable	F	26
Vulnerable	F	27
Resilient	F	14
Vulnerable	F	22
Vulnerable	F	10
Vulnerable	F	9
Vulnerable	F	26
Vulnerable	F	24
Vulnerable	F	20
Vulnerable	F	9
Vulnerable	F	4
Vulnerable	F	26
Vulnerable	F	25
Resilient	F	25
Vulnerable	M	14
Resilient	M	1
Vulnerable	M	8
Vulnerable	M	15
Vulnerable	M	21
Vulnerable	M	24
Resilient	M	4
Resilient	M	20
Vulnerable	M	20
Resilient	M	15
Vulnerable	M	5
Vulnerable	M	5
Vulnerable	M	27
Vulnerable	M	10
Resilient	M	13
Vulnerable	M	1
Vulnerable	M	10
Resilient	M	2
Vulnerable	M	25
Vulnerable	M	9
Vulnerable	M	7
Vulnerable	F	16
Resilient	F	0
Vulnerable	F	18
Resilient	F	1
Vulnerable	F	35
Vulnerable	F	8
Vulnerable	F	24
Resilient	F	11
Resilient	F	2
Vulnerable	F	6
Resilient	F	8
Vulnerable	F	30
Vulnerable	F	14
Vulnerable	F	9
Vulnerable	F	23
Resilient	F	14
Vulnerable	F	9
Vulnerable	F	10
Vulnerable	F	14
Vulnerable	F	22
Vulnerable	F	29
Vulnerable	F	6
Resilient	M	8
Resilient	M	2
Resilient	M	0
Vulnerable	M	5
Vulnerable	M	0
Resilient	M	5
Vulnerable	M	7
Resilient	M	4
Vulnerable	M	5
Resilient	M	4
Vulnerable	M	16
Vulnerable	M	3
Resilient	M	2
Vulnerable	M	15
Resilient	M	1
Resilient	M	2
Resilient	M	1
Resilient	M	8
Vulnerable	M	8
Vulnerable	M	5
Resilient	M	7
Vulnerable	M	13
Resilient	M	2
Vulnerable	M	1
Vulnerable	M	14
Vulnerable	M	7
Vulnerable	M	5
Resilient	M	3
Vulnerable	M	2
Vulnerable	F	19
Vulnerable	F	10
Vulnerable	F	4
Vulnerable	F	8
Vulnerable	F	7
Resilient	F	0
Vulnerable	F	6
Vulnerable	F	10
Vulnerable	F	14
Vulnerable	F	10
Vulnerable	F	0
Vulnerable	F	5
Vulnerable	F	3
Vulnerable	F	2
Vulnerable	F	12
Vulnerable	F	17
Vulnerable	F	10
Vulnerable	F	15
Vulnerable	F	4
Vulnerable	F	10
Vulnerable	F	8
Vulnerable	F	6
Vulnerable	F	8
Vulnerable	F	12
Vulnerable	M	9
Resilient	M	2
Vulnerable	M	14
Vulnerable	M	11
Vulnerable	M	4
Resilient	M	7
Vulnerable	M	21
Vulnerable	M	2
Vulnerable	M	7
Vulnerable	M	23
Vulnerable	M	19
Vulnerable	M	4
Vulnerable	M	27
Vulnerable	M	4
Vulnerable	M	5
Resilient	M	0
Vulnerable	M	9
Vulnerable	M	15
Vulnerable	M	23
Vulnerable	M	14
Resilient	M	3
Vulnerable	M	10
Vulnerable	M	2
Vulnerable	M	5
Vulnerable	M	4
Resilient	M	4
Vulnerable	F	26
Vulnerable	F	2
Resilient	F	4
Vulnerable	F	12
Vulnerable	F	44
Vulnerable	F	10
Vulnerable	F	1
Vulnerable	F	20
Resilient	F	59
Vulnerable	F	4
Resilient	F	1
Vulnerable	F	32
Vulnerable	F	3
Resilient	F	63
Vulnerable	F	1
Vulnerable	F	38
Vulnerable	F	24
Vulnerable	F	4
Vulnerable	F	21
Vulnerable	F	35
Vulnerable	F	24
Vulnerable	F	8
Vulnerable	F	3
Vulnerable	F	42
Vulnerable	F	22
Vulnerable	F	39
Vulnerable	F	27
Vulnerable	F	21
Vulnerable	M	4
Resilient	M	5
Resilient	M	0
Resilient	M	1
Vulnerable	M	29
Vulnerable	M	35
Resilient	M	1
Vulnerable	M	5
Vulnerable	M	11
Vulnerable	M	11
Vulnerable	M	15
Vulnerable	M	23
Vulnerable	M	3
Resilient	M	2
Resilient	M	10
Vulnerable	M	14
Resilient	M	3
Vulnerable	M	3
Vulnerable	M	18
Vulnerable	M	17
Resilient	M	1
Vulnerable	M	5
Vulnerable	M	16
Vulnerable	M	14
Vulnerable	M	3
Vulnerable	M	16
Vulnerable	M	24
Vulnerable	F	24
Vulnerable	F	18
Vulnerable	F	13
Vulnerable	F	7
Vulnerable	F	3
Resilient	F	1
Vulnerable	F	14
Vulnerable	F	14
Resilient	F	6
Vulnerable	F	12
Vulnerable	F	10
Vulnerable	F	7
Resilient	F	4
Vulnerable	F	18
Resilient	F	4
Resilient	F	7
Resilient	F	6
Vulnerable	F	20
Vulnerable	F	6
Vulnerable	F	28
Vulnerable	F	22
Vulnerable	F	20
Vulnerable	F	32
Vulnerable	F	9
Vulnerable	M	0
Resilient	M	1
Resilient	M	0
Vulnerable	M	1
Vulnerable	M	20
Vulnerable	M	10
Vulnerable	M	1
Vulnerable	M	20
Vulnerable	M	4
Vulnerable	M	9
Vulnerable	M	6
Resilient	M	3
Vulnerable	M	7
Resilient	M	4
Vulnerable	M	6
Resilient	M	13
Vulnerable	M	2
Vulnerable	M	11
Vulnerable	M	1
Vulnerable	M	10
Resilient	M	1
Vulnerable	M	3
Vulnerable	M	9
Vulnerable	M	3
Vulnerable	M	14
Vulnerable	M	5
Vulnerable	M	7
Vulnerable	F	24
Vulnerable	F	19
Vulnerable	F	17
Vulnerable	F	10
Vulnerable	F	3
Vulnerable	F	21
Vulnerable	F	8
Vulnerable	F	16
Vulnerable	F	1
Resilient	F	4
Vulnerable	F	19
Vulnerable	F	8
Vulnerable	F	24
Vulnerable	F	32
Vulnerable	F	1
Resilient	F	7
Resilient	F	12
Vulnerable	F	9
Vulnerable	F	7
Vulnerable	F	11
Vulnerable	F	9
Vulnerable	F	0
Vulnerable	F	12
Resilient	F	4
Resilient	M	3
Resilient	M	4
Vulnerable	M	9
Vulnerable	M	5
Vulnerable	M	8
Vulnerable	M	18
Resilient	M	2
Vulnerable	M	4
Vulnerable	M	18
Vulnerable	M	9
Vulnerable	M	4
Resilient	M	3
Vulnerable	M	0
Resilient	M	2
Vulnerable	M	8
Vulnerable	M	5
Vulnerable	M	6
Vulnerable	M	9
Vulnerable	M	12
Resilient	M	1
Vulnerable	M	12
Vulnerable	M	6
Vulnerable	M	19
Vulnerable	M	8
Resilient	M	2
Vulnerable	M	4
Vulnerable	F	8
Vulnerable	F	0
Vulnerable	F	6
Vulnerable	F	0
Vulnerable	F	22
Vulnerable	F	2
Resilient	F	8
Vulnerable	F	4
Vulnerable	F	7
Resilient	F	2
Vulnerable	F	11
Vulnerable	F	29
Vulnerable	F	10
Resilient	F	12
Vulnerable	F	54
Vulnerable	F	0
Vulnerable	F	20
Vulnerable	F	25
Vulnerable	F	33
Vulnerable	F	5
Vulnerable	F	11
Resilient	F	2
Resilient	F	21
Vulnerable	F	2
Vulnerable	M	3
Resilient	M	2
Resilient	M	6
Resilient	M	1
Resilient	M	1
Resilient	M	2
Resilient	M	13
Vulnerable	M	4
Resilient	M	1
Resilient	M	1
Resilient	M	4
Resilient	M	3
Resilient	M	0
Resilient	M	5
Vulnerable	M	2
Vulnerable	M	1
Vulnerable	M	21
Resilient	M	6
Vulnerable	M	37
Vulnerable	M	19
Vulnerable	M	20
Vulnerable	M	21
Resilient	M	0
Vulnerable	F	25
Vulnerable	F	29
Vulnerable	F	22
Vulnerable	F	34
Vulnerable	F	16
Vulnerable	F	26
Vulnerable	F	35
Vulnerable	F	37
Vulnerable	F	14
Vulnerable	F	9
Vulnerable	F	4
Vulnerable	F	24
Vulnerable	F	4
Vulnerable	F	23
Vulnerable	F	37
Vulnerable	F	24
Vulnerable	F	18
Vulnerable	F	0
Vulnerable	F	66
Vulnerable	M	17
Vulnerable	M	13
Vulnerable	M	26
Resilient	M	5
Vulnerable	M	8
Vulnerable	M	21
Vulnerable	M	7
Vulnerable	M	4
Vulnerable	M	15
Vulnerable	M	22
Vulnerable	M	11
Vulnerable	M	9
Vulnerable	M	13
Vulnerable	M	30
Vulnerable	M	3
Vulnerable	M	6
Vulnerable	M	6
Vulnerable	M	26
Vulnerable	M	13
Vulnerable	M	21
