# Supplementary material for: Large-scale characterization of cocaine addiction-like behaviors reveals that escalation of intake, aversion-resistant responding, and breaking-points are highly correlated measures of the same construct
Source: eLife. 2024 Nov 1;12:RP90422. doi: 10.7554/eLife.90422 (PMC11530236; doi:10.7554/eLife.90422)
Supplement: Figure 3—source data 1. — Groups are split by resilient and vulnerable animals. ‘Rat info Raw data’ tab contains the raw data table with all data analyzed, other tabs have the data split per panel in the figure as indicated. (A) Number of cocaine infusions per hour of cocaine self-administration during short (2 hr, short access: ShA) and long (6 hr, long access: LgA) access, split by resilient and vulnerable animals (N=122 resilient and 445 vulnerable). (B) Average number of daily infusions for the last 3 days of LgA, by vulnerability. (C) Number of cocaine infusions under progressive ratio (PR) tested after ShA or LgA (period). (D) Number of infusions despite footshock after LgA. (E) Difference in irritability scores after LgA and at baseline (irritability) per type (aggressive, defensive, or total) and group (cocaine or naïve). [file elife-90422-fig3-data1.xlsx]

## Sheet: Panel A
lga_last_three_days	split	sha_1	sha_2	sha_3	sha_4	sha_5	sha_6	sha_7	sha_8	sha_9	sha_10	lga_1	lga_2	lga_3	lga_4	lga_5	lga_6	lga_7	lga_8	lga_9	lga_10	lga_11	lga_12	lga_13	lga_14
143	Vulnerable	0.5	1	0.5	0	0	0	0	6.5	9.5	10.5	15.1667	13.8333	14.8333	13.5	21.6667	16.8333	13.6667	13.8333	17.5	18.8333	19.5	24.1667	27	20.3333
148.667	Vulnerable	0	1	1.5	0.5	0.5	1.5	15.5	7	2	8	14.5	5.83333	18.3333	14.3333	19.1667	17.3333	16	17.6667	22.3333	21.1667	22.3333	26.3333	23.3333	24.6667
37	Resilient	3	2.5	2	0	1.5	3.5	4.5	10.5	9.5	10	10.6667	13	13.3333	12.1667	14.8333	13.1667	9.66667	9.5	5.5	11.1667	2.66667	5.5	8.33333	4.66667
133.333	Vulnerable	0.5	1	3	3.5	3.5	12.5	17	16	15.5	15.5	13.8333	13	15	13.5	17.6667	17.5	17.8333	18.8333	21.5	22	25.1667	22.6667	22.3333	21.6667
81	Vulnerable	1	1	0.5	0	0	0	0	0.5	0.5	0	0.5	0.5	10.6667	2.66667	9	4.16667	12.5	1.66667	4	11.3333	15.5	17.3333	16.3333	6.83333
152.333	Vulnerable	1	0.5	4.5	0	0.5	0.5	0	1	0	1	8.5	12	15.5	19	26.5	18.5	19	20.1667	20.3333	37.8333	24.8333	27	25.8333	23.3333
79.5	Vulnerable	0	2	0	0.5	0	0	0.5	0	0	0	0.5	0	0	0	0.5	0.166667	0.5	0.333333	1.16667	17.6667	29.8333	20.75	11.6667	7.33333
0	Resilient	0	2.5	3	1.5	1	0	0	0	0	0	0	0	0	0	0	0	0	0	0	0.166667	0.166667	0	0	0
151.333	Vulnerable	0	0.5	2.5	1.5	0.5	1	0.5	1	0	0	0.833333	0.333333	1.66667	1.5	19.8333	21.6667	20.6667	21	24.1667	12.8333	28.8333	26.3333	24	25.3333
188	Vulnerable	0.5	0	1	0	2	1.5	2.5	4.5	9.5	22	24.8333	20.8333	19.3333	14.3333	3.83333	21.5	21.6667	14.3333	19.1667	22.8333	36.8333	34.1667	28.6667	31.1667
119	Vulnerable	0	0	1	1.5	4.5	13.5	20.5	21	18.5	19	17.3333	17	15.5	20.6667	17.5	16	16.6667	16.1667	16.6667	19.5	17.6667	20	19.8333	19.6667
111	Vulnerable	0	0.5	0	0	0	0	0	1	1.5	1	0.333333	0.166667	0.5	0.5	0.333333	0.5	0.333333	1	0.666667	0.833333	12.3333	19.3333	17.8333	18.3333
115	Vulnerable	0.5	0.5	1	0	0	0.5	1.5	0	0.5	0	0.333333	0.333333	0	0	0.166667	0.666667	2.16667	15.3333	18.8333	16	20.1667	18.3333	19.1667	20
159.333	Vulnerable	0.5	1	1.5	0	1	0	0.5	0.5	0.5	0	0	0	0.333333	0.166667	0	0.5	0	0.5	0	1	13.3333	25.6667	30	24
117.333	Vulnerable	2	1	0	0	0.5	2	0.5	0	0	1	5.16667	14.6667	17	19.5	18	15	9.83333	10.3333	12	14.3333	16.3333	19.1667	19.3333	20.1667
171.667	Vulnerable	3.5	4.5	2	18.5	26.5	22	14.5	18	17	20	19.5	17.6667	18.1667	10.8333	21.8333	21.3333	21.3333	20.5	22.5833	24.6667	27	31	26.6667	28.1667
102	Vulnerable	3	1.5	2	1	2.5	2.5	6	8.5	3.5	10.5	17.8333	13.6667	13.1667	15.5	14	13.6667	16	15.8333	8.5	18	17.1667	10.6667	21.1667	19.1667
152	Vulnerable	4	1	0	0.5	0.5	1	0.5	1.5	0.5	0.5	0.666667	0.666667	0	17.3333	22	21	18.6667	19.3333	16.3333	23.3333	21.5	24.8333	27.8333	23.3333
117.667	Vulnerable	2	1	7	11	13.5	20.5	14	21	22	23	16.3333	16.3333	19.5	20	14.8333	13.8333	12.5	15.8333	17.8333	20.1667	16.1667	18.6667	19.6667	20.5
163	Vulnerable	4	3	3	20.5	19	20.5	19	21.5	21.5	20.5	21.5	19.5	19.3333	19.3333	18	17	18.6667	20	20.8333	21.6667	26.6667	28	26.6667	26.8333
135	Vulnerable	18	4	4.5	2.5	9.5	16	17	19.5	18	18	19.1667	13.6667	16.8333	19.8333	15.3333	15	17.8333	25	14.8333	19.8333	18.3333	30.3333	13.8333	23.3333
6.33333	Resilient	1.5	0.5	1	0.5	0	1	0	0.5	0	1.5	0.333333	0.333333	0.5	0	0.333333	0	0.166667	0.333333	0.583333	0.833333	1.66667	0.833333	0.833333	1.5
38.6667	Resilient	0	0.5	0	0.5	1	0	0	0.5	1.5	1.5	3.66667	5.33333	0.833333	2	2.33333	0	0.333333	2.33333	17.6667	4.16667	4.5	6.16667	5.16667	8
116.667	Vulnerable	2.5	2	1.5	4	10	9	8	5.5	5	6	9.5	6.33333	12	15	18.6667	16.8333	16.8333	16.8333	20	19.1667	18	18.6667	19.3333	20.3333
110.333	Vulnerable	1.5	1	1.5	1	1	12	15	21	29	23.5	12.6667	17.5	17	18.5	18.5	17.8333	17.3333	17.3333	14.5	17.3333	14.5	16.1667	18.3333	20.6667
1.66667	Resilient	0	0	1	1.5	1	0.5	1.5	1	0.5	0	0.166667	0.5	0.5	0.333333	0.5	0.666667	0	0.166667	0.25	0.333333	0	0.5	0	0.333333
92.3333	Vulnerable	3	1	2	0.5	0	0.5	1.5	1	0	1	0.333333	1.5	1.5	16.6667	18.5	23.1667	17.3333	19.1667	21.6667	4	7.66667	10.3333	14.6667	21.1667
0	Resilient	1	1	2	0.5	0	1.5	2	7.5	0	0	0	0	0	0	0	0	0	0	0	0	0	0	0	0
110.667	Vulnerable	9.5	7.5	19.5	15.5	17.5	15.5	19	16	17	18	16.3333	15.3333	16.3333	16.1667	18	17.6667	17.6667	18.8333	17.1667	17.1667	17.6667	17.3333	17.6667	20.3333
149	Vulnerable	0	0	0	0	0	1	0	0	0.5	0	2.66667	2.33333	16.8333	19.6667	22.3333	24.1667	19	19.8333	19.5	23.3333	20.1667	21.3333	23.1667	30
124	Vulnerable	0.5	0	1	0.5	0.5	0	1	1	1	0	1.5	0.666667	0.833333	1.5	0.666667	4	22.3333	10	13.3333	15.6667	22	16.1667	21.1667	24.6667
45	Resilient	1	0.5	1	0.5	1	0.5	0	1	0	0	0.666667	1.33333	1.33333	0.833333	1.5	1.16667	5	4.33333	9.16667	0	12.6667	0	0.333333	22.1667
9.33333	Resilient	0.5	0.5	1	1	1	2	1.5	1	7.5	12.5	15.6667	19.6667	3.16667	5	1.33333	2.16667	1.33333	0.833333	1.83333	1.33333	2.16667	1.66667	1.5	1.5
114.333	Vulnerable	2	1.5	2.5	10	2.5	4.5	2.5	6	0	1.5	11	3.66667	5	11.5	12.1667	12	17	18	15.6667	15.3333	16.1667	17.5	19.8333	19.8333
4	Resilient	1.5	0.5	0	0	0	7.5	9	7.5	0	5	2.5	0.5	0.5	0.166667	1.66667	1.5	0.666667	1.5	0.666667	1.33333	0.833333	0.666667	0.5	0.833333
18.3333	Resilient	0.5	0.5	2	0.5	1	1	1.5	2.5	3.5	3	5.33333	1.5	0.5	2.66667	5	1.33333	4.5	0.333333	0.833333	5	3.33333	4	1.66667	3.5
4	Resilient	0.5	0	0	0.5	0	1	0	1.5	0.5	1.5	1	0.833333	1.16667	1.16667	1.33333	0.833333	1.33333	0.333333	0.666667	0.666667	0.333333	1.16667	0.333333	0.5
121	Vulnerable	2	1.5	1.5	0.5	2.5	2.5	2.5	4	2.5	0.5	0.833333	1.33333	1.5	0.5	7.66667	5.5	1.5	14.3333	5.66667	18.8333	19.5	19.5	19.5	21.5
143.667	Vulnerable	2.5	2.5	0.5	2	0.5	1.5	2.5	1.5	5.5	10.5	9.5	16.1667	20.1667	17.5	21.8333	17.8333	21	21.8333	21.6667	23.8333	25.5	21.8333	25	25
118	Vulnerable	3	0.5	2.5	2	2	1	1	1	0	1.5	1	0.166667	0.5	0.5	1	3.33333	4.66667	10.8333	11.5	14.8333	18.5	17.8333	19.8333	21.3333
143.5	Vulnerable	0.5	0	0	1	1	1	1	0.5	2.5	0	0.333333	1	1	1	1	8.83333	8.83333	19.6667	20	22.1667	25.5	25.3333	22.5	23.9167
166.667	Vulnerable	2.5	2.5	0	0	1	0	0.5	0.5	1.5	0.5	0.666667	1.16667	4	1	6.83333	0.666667	1.83333	9	15.6667	16.1667	21.3333	21.8333	28.3333	33.1667
20.6667	Resilient	2	0.5	2	0	2	0	0.5	1.5	0.5	1	0.5	1.66667	2	3.83333	4.33333	4.16667	5.33333	5.33333	6	10.1667	8.66667	4.33333	3.66667	2.33333
114	Vulnerable	0.5	3	1.5	1.5	1	3.5	2.5	3	2.5	2.5	1.33333	12.3333	7.33333	8.5	9.83333	10.5	9.33333	6.33333	14.8333	18.5	20.8333	20	22.1667	14.8333
77.6667	Vulnerable	0	0	0	0.5	2	0	1	0	1.5	2	3.16667	12.5	2.16667	10.5	12	9.83333	10.3333	4.83333	15.1667	13.8333	15	12.8333	8.66667	17.3333
125.667	Vulnerable	0	0	0	0	0	0	0	0.5	0	1	4.33333	10.6667	6.66667	18.1667	19.6667	20.1667	17.1667	17	21.1667	18.8333	19	19	21.1667	22.6667
104	Vulnerable	0	2	0.5	1.5	1	3	8	8	6.5	8	7.83333	16.3333	12.1667	15.3333	16.6667	15.3333	16.3333	14.3333	14.8333	16.5	16.8333	16.6667	17.3333	18
77.3333	Vulnerable	1	0	0.5	0	0	0.5	0	1	1	0	1.16667	0.666667	1	0.666667	0.833333	0.333333	6.16667	7.5	7.5	8.83333	10	11	12.1667	15.5
140.333	Vulnerable	1	0	0.5	0	0	0.5	0.5	1.5	0	2	1.33333	2.5	3	11	14.8333	12	18.1667	21.5	21.1667	19.6667	21.6667	21.5	24.5	24.1667
143.333	Vulnerable	3.5	0.5	0	0.5	4.5	2	1	1.5	4	1.5	2.83333	2.33333	2.33333	3.83333	3	14.3333	10.1667	10.3333	20.1667	20.8333	19.3333	25.5	22.3333	23.8333
112.333	Vulnerable	1	0	0.5	0	0.5	1.5	3.5	5	5	10	7.33333	3.33333	3.16667	12.6667	9	8.83333	14.5	19	23.6667	18.3333	19.6667	17	19	20.1667
110.333	Vulnerable	2	7.5	19	21	17.5	17.5	21.5	25.5	22.5	18.5	16.5	16.3333	18.5	17.6667	19	18	14.8333	16.1667	17.5	17.5	18.5	18.5	18	18.6667
141.667	Vulnerable	0	0	0.5	12.5	5	15.5	16	21.5	23	21.5	16.1667	19.3333	23.6667	24.8333	23.1667	20.6667	21.1667	23.3333	25.8333	19.5	21.3333	22.5	24.5	23.8333
164.333	Vulnerable	4	1	2.5	5	16	16.5	24.5	27.5	26	24	22.5	20.8333	24.3333	22.3333	24.3333	23.5	22.3333	22.1667	25.1667	20.6667	23.5	25.8333	23.3333	33
128.667	Vulnerable	0	3	0.5	0	2.5	2	7	20	21	19	19.5	16.1667	18.5	18.1667	10.3333	14.1667	14.6667	9.5	13	15	25	19.5	20.6667	24.1667
95.6667	Vulnerable	0.5	0.5	0.5	2	5.5	2.5	1.5	0.5	2.5	3	1.16667	0.333333	0.833333	12	9.33333	3.16667	5.33333	11.6667	15.8333	14.1667	15.5	11.1667	17.8333	18.8333
110.333	Vulnerable	0	0	0	0.5	0	0	0	0	0	2	0	0	0	0.166667	0.666667	1.5	7	5.5	6.83333	7.83333	13.6667	18	18.3333	18.8333
97	Vulnerable	1.5	1	0.5	0	0.5	4	2.5	2.5	4	11.5	15	17.8333	21.1667	20.8333	23.5	20	24.8333	21	17.3333	15	16.6667	16.1667	15.1667	17.1667
147	Vulnerable	1	1	1	1	3	3.5	2	9.5	6.5	20.5	25	28	25.5	29.6667	27.6667	25	27.3333	28.3333	29.3333	25	24.1667	23.8333	25.1667	24.5
124	Vulnerable	2	1.5	4.5	16	17	10.5	16.5	14	21.5	19.5	18.8333	19.6667	20.1667	22.3333	20.8333	17.3333	19.1667	21.6667	21.5	19.5	19.3333	19.1667	20.1667	22.6667
169	Vulnerable	0.5	2	1.5	1.5	3.5	22.5	24	30	30.5	29	28.8333	28.8333	24.5	32	32.8333	32	28.5	42	50.8333	34.5	31.6667	29.1667	29.5	25.8333
120.667	Vulnerable	1.5	0	0.5	0	0	1	0.5	0	0	1	1	5.66667	18.8333	20.8333	21	19.5	22	23	23.6667	19.6667	19.3333	21.5	21.3333	17.5
157.333	Vulnerable	1.5	1	0	3	14	0	8	31	12	29	33.3333	27.5	21.8333	33.5	1.16667	22.6667	21	21.1667	27.8333	23.3333	22.6667	29	26	23.6667
189	Vulnerable	2	1	1	0.5	0.5	1	2	13	20.5	29.5	24.6667	24.1667	29.6667	27.8333	33.6667	23.5	24	27.1667	34.1667	26.1667	29.8333	30.6667	35	28.8333
85.6667	Vulnerable	0.5	0	0	0	1	1.5	0.5	0.5	0	2	0.666667	0.666667	3.33333	3.66667	2.5	3.5	23.8333	18.5	9.5	8.83333	26.8333	8.33333	24.6667	9.83333
25.5	Resilient	1.5	1.5	0.5	0.5	2	0.5	1	0	1.5	0.5	1	0.166667	0.5	0.666667	2.5	3	6.16667	3.5	3.83333	7.66667	6.83333	3.83333	4.25	4.66667
129	Vulnerable	1	0	0.5	0.5	0.5	0.5	0	1	0.5	1	0.833333	0.666667	0.5	0.666667	0.5	2	2.83333	11.8333	17.5	17	17.6667	20.1667	19.5	24.8333
136.333	Vulnerable	1	0.5	0.5	0.5	2.5	0.5	0	0.5	0.5	1	2.66667	9.16667	12.8333	18.6667	19.1667	18.1667	16.1667	20.3333	22.5	19.1667	20.6667	22.5	21.5	24.1667
92	Vulnerable	0	0.5	0	0	0	0	1	0	0	2	4	7.33333	5.16667	15.8333	12.1667	9.83333	13.6667	14.6667	15.3333	13.1667	14.3333	15.6667	15.3333	15
82	Vulnerable	0.5	1	0	0	0	1	2	1	3	1.5	1.5	1.83333	3.5	1.83333	2.5	3.16667	2	2.33333	11	8	6.83333	12	9.83333	19.1667
104	Vulnerable	1.5	3.5	2.5	1	2.5	2	1	1.5	29.5	45	15	14.6667	14.5	17.6667	16.8333	13.6667	15	15.8333	18.5	14.6667	15.8333	16.5	16	19.5
106.333	Vulnerable	2	0.5	0	0	1	0.5	0	0	0	0.5	0	0	0	0.333333	0.5	0.333333	1.33333	13.1667	9.33333	13.8333	19.6667	16.1667	17.5	19.5
102.667	Vulnerable	1.5	0	1.5	3	3	1.5	1.5	1	1.5	2	4.66667	7.33333	9.66667	9.16667	10.6667	13.3333	15	16.1667	18.1667	16.8333	18.5	17.5	17	16.8333
98.3333	Vulnerable	2	2	1.5	2.5	2.5	2	1	3	1	9	20.1667	15.3333	18.6667	19.3333	22.3333	18	18	19.3333	19.1667	16	14.3333	17.5	17	14.6667
157.667	Vulnerable	2	0	0.5	0	0.5	0	0	0	0	0	0	0.166667	0.166667	0.166667	0.166667	0.333333	0	0.333333	0.333333	12.8333	7.16667	15.5	32.8333	30.5
79.6667	Vulnerable	3.5	1.5	2.5	7.5	8	10	7	5	9	14	2.66667	3.66667	0	0	0	0	0	3	16.6667	15.6667	14.3333	11.8333	7.83333	20.1667
82	Vulnerable	1	0.5	0.5	0	0	0.5	0.5	0.5	0.5	0.5	0.333333	0.333333	0.333333	0.5	0.666667	0.166667	0.666667	0.5	1.5	1	0.666667	11.5	14.5	15
138.667	Vulnerable	4	1.5	1.5	1.5	1	3.5	13	16.5	20.5	23	26.3333	26.1667	27	27	28.6667	26.5	26	27.1667	31.8333	24	26.8333	25.3333	20.3333	23.6667
157	Vulnerable	0.5	1	1	0	0.5	0	0	0	0	1.5	1.33333	2.5	3.83333	8.33333	8.5	9.33333	16.3333	12.8333	18	19	21.3333	24	27.1667	27.3333
154	Vulnerable	2	1	1.5	1	1.5	2	3	5	15	16.5	20.1667	24.6667	22.3333	23	24.1667	15.1667	22.5	24	24	22.8333	24.5	25.1667	25.8333	26
149.333	Vulnerable	1.5	1.5	2.5	4	4.5	3.5	15.5	10.5	23.5	9	7.66667	6.33333	19.3333	22.6667	24.3333	20.5	21.5	22.5	23	21.3333	22.8333	24	24.1667	26.5
172.5	Vulnerable	4.5	6.5	4	1	0.5	4	0.5	3.5	25	23.5	22.6667	27.6667	27.5	24.8333	27.1667	24.8333	27.1667	30.8333	29.8333	25.1667	29	29.5833	30.1667	26.5
137	Vulnerable	2	1.5	2	4.5	2.5	5	7.5	7.5	4.5	5.5	10.5	15.3333	12.6667	20.3333	17	16	17.8333	20.5	20.5	19.1667	22.3333	23.6667	21	23.8333
137	Vulnerable	4.5	4	3	5.5	7.5	7	10.5	8	10	10.5	12.8333	16.5	16.3333	17.8333	19	17	18.3333	18.8333	19.8333	17.8333	20.3333	22.1667	23.3333	23
127	Vulnerable	4	3	4	3	4	3.5	0.5	1.5	1	1.5	2.33333	1.33333	3.16667	16.8333	22.6667	17.8333	18.4167	19	21.1667	17.5	18	20	19.8333	23.6667
91.6667	Vulnerable	0	1	0.5	0	1.5	1	1.5	1	2	3.5	5.16667	5.33333	1.83333	8	5	7.66667	11.1667	10.3333	19	14.3333	16.5	17.1667	10.8333	17.8333
0	Resilient	1.5	1	0.5	0.5	1	0	0	0	0	0	0.666667	0	0	0	0	0.166667	0	0.166667	0	0	0	0	0	0
93.3333	Vulnerable	4	1	1.5	2.5	4	5	8.5	10.5	9	4	11.6667	8.33333	9.5	14.5	2.33333	11.5	13.6667	13.3333	16.3333	15.5	16.5	15.3333	14.6667	16.6667
116.5	Vulnerable	3	3.5	1	3	1	4	2.5	5	10.5	9	15	9.83333	13.1667	14.5	8.83333	15	16.6667	10	20.5	18.1667	17.1667	20.1667	19.4167	18.6667
111.667	Vulnerable	12	2.5	3	5	6	1.5	2.5	1.5	4	4.5	14.1667	11.5	9.33333	16.8333	11.8333	18.8333	7	21.3333	19.8333	17.5	19.5	17.8333	16.5	21.5
145.667	Vulnerable	26.5	16.5	13.5	12	13.5	10	12	13	12.5	15	17.1667	17.3333	18	18.6667	19.1667	21.5	22.5	29.5	22.8333	23.3333	26.3333	25.8333	25.3333	21.6667
147	Vulnerable	11.5	12.5	6	5.5	3	1	5	1	3.5	7	7.83333	11	10.6667	17.5	17.3333	20.3333	18.6667	21.5	21.6667	20.3333	21.3333	25.8333	23.8333	23.8333
100.333	Vulnerable	11.5	5.5	1.5	3	2	2	2.5	1	0.5	2	8.5	16.6667	6	13.3333	5.66667	15.6667	12	14.1667	9.33333	6	10.8333	16.3333	18.3333	15.5
42.3333	Resilient	6	3	2	2	2	2.5	4	7	7.5	7	9.33333	7.16667	6	7.33333	7.16667	7	6.83333	8.16667	7.16667	6.66667	7.5	7.83333	8	5.33333
76	Vulnerable	9.5	4	3.5	5.5	1	1	2	5	5.5	5	5.66667	10	8.5	11.1667	11.8333	11.6667	12.8333	11.6667	12.1667	7.83333	10.6667	15.6667	8.5	13.8333
130.667	Vulnerable	2	13.5	4.5	12.5	5.5	11.5	12.5	11.5	13.5	10	15.3333	16.5	15.3333	16	16.5	16.8333	17.1667	23	17.1667	20.1667	22.5	23.8333	21.5	20
99	Vulnerable	1	2	0	0	0	15.5	13	12	12.5	10.5	14	13.3333	13.8333	13.1667	15.1667	13.6667	13.6667	15.6667	14.3333	12.8333	15.3333	15.3333	17.5	16.6667
128.667	Vulnerable	1	2.5	0	0	1	2	0	2.5	0.5	2	8.33333	15.6667	14.8333	16.5	14.5	15.8333	17	20.5	17.3333	18.1667	18.1667	21.1667	23.6667	19.5
155	Vulnerable	2	0	0.5	0	0.5	0	0	0	0	0.5	3.66667	8.33333	7.16667	13.1667	18.8333	18.8333	19.6667	21.3333	20.5	17.6667	23.8333	24.5	24.5	28.5
107	Vulnerable	2	0	0	1	1.5	14.5	13	13	15	15.5	11.1667	12.6667	13	13.8333	13	15	16.5	17	17.8333	15.8333	17.6667	18.5	17.6667	17.3333
0.666667	Resilient	0.5	0.5	0.5	0	0	0	0	0	0	0	0	0.166667	0	0	0	0.166667	0	0	0.166667	0	0.166667	0	0.333333	0
125.667	Vulnerable	2	2.5	0.5	3	11	25.5	15.5	15.5	19	21	21.8333	22.6667	22.6667	20.5	17.3333	22.3333	22.1667	28.5	21.5	23	27.8333	27	12.3333	23.5
117.667	Vulnerable	1	0.5	1	1	0	0	0	0	0	0.5	0	0.166667	0.166667	7	2.66667	5	17.8333	18.1667	18.6667	19	21.5	22.3333	18	18.5
51.3333	Vulnerable	0.5	1	0.5	0.5	0.5	1.5	0.5	0	0.5	0	0	0.5	0.666667	0.833333	1	0.833333	0.166667	10.5	6.33333	10.1667	10.6667	11	8.83333	5.83333
150.667	Vulnerable	2.5	4	3.5	11.5	6.5	32	13	15.5	13	9.5	24.8333	18.1667	25.5	32.3333	22.5	22	24.3333	24.8333	22.6667	20.8333	23.1667	28	24.6667	22.6667
140.667	Vulnerable	0.5	1	1	1.5	1	2.5	18	25.5	17.5	19.5	27.3333	24.1667	23.5	24.3333	22.3333	24.6667	28.8333	28.5	33	24.6667	29.8333	14.1667	31.5	24.6667
147.333	Vulnerable	1.5	1	0	0	0.5	1.5	8	4.5	31.5	27.5	25.3333	20.5	22.3333	22.3333	20.1667	21.6667	20.8333	26.5	24.8333	23.6667	25	24.5	21.3333	27.8333
114.667	Vulnerable	0.5	0.5	0.5	0	0	0	0.5	0	0	0.5	0.166667	0.666667	0.166667	0.166667	0.666667	0.5	0.166667	0.833333	0.666667	0.666667	4	19.5	19.1667	18.6667
161.667	Vulnerable	1.5	0.5	1	0	0	0	0	0.5	0.5	0	0.833333	4.83333	15.1667	24.8333	19.1667	20.8333	13.6667	16.1667	19.8333	19.5	23	23.6667	30	27.1667
24.3333	Resilient	1	0.5	0	0.5	0.5	1	1.5	3.5	3.5	1	6.83333	5.33333	3.16667	8	10.1667	6.5	2.83333	3	5.83333	4.66667	4	5.33333	2.5	4.33333
130.333	Vulnerable	5	2	2.5	0.5	1	0.5	1	0.5	0.5	1.5	7	14.5	21	22.8333	26.8333	23	24	27.3333	22.8333	22.1667	25.6667	23	20.1667	22
104.333	Vulnerable	2.5	2	1	2	0.5	4	4.5	1.5	5	9.5	11.3333	9	13.3333	14.1667	14.8333	15.3333	16.8333	16.8333	17.3333	15.8333	16.3333	16.6667	18.5	17
111.667	Vulnerable	2	1	1	1.5	3	2	14.5	2.5	13.5	5	8	8.16667	10.1667	16	17.5	18.3333	19.5	19.6667	18.8333	17.5	17.3333	20.8333	17.8333	17.1667
83.3333	Vulnerable	2	1.5	0.5	1	2	0.5	2	3.5	3	6	5.83333	5.16667	5.16667	9.16667	9	12.6667	14.3333	12.5	16.5	12.5	13.8333	13.1667	13.1667	15.3333
85	Vulnerable	2	0	1	1	0	0	1	1	0	0	0	0.333333	0.5	0.5	0.5	2	8.16667	14.8333	18.1667	14.5	17.3333	17	7.33333	18.1667
80.5	Vulnerable	0	0.5	0	0	0.5	0.5	1.5	2.5	1	0.5	2.16667	1.66667	3.83333	9.5	8.33333	15.3333	18.3333	15.3333	22	10.1667	3.16667	10	13.4167	16.8333
149.667	Vulnerable	33	21.5	24.5	17.5	18	21	20.5	21	22.5	25	23.5	27.1667	28.3333	25.5	23.3333	21.8333	22.3333	25	23.8333	22.1667	23.3333	25.3333	26.6667	22.8333
64	Vulnerable	1.5	1	1	0	1	0.5	0	1	1.5	0.5	1.33333	1.5	1.5	2.33333	5	1.83333	3.5	10	14.8333	15.3333	13.8333	8.5	8.16667	15.3333
109.667	Vulnerable	0.5	0	0.5	0.5	1	1	0.5	1	0.5	0.5	1.16667	1.16667	4.5	5	16.1667	12.6667	20.1667	21.8333	8.66667	21.1667	20	17.1667	18.1667	19.5
122.667	Vulnerable	2.5	1	1	1	0.5	3.5	3	5	2	4.5	14.3333	14.5	13.3333	17	19	21.5	19.8333	21.3333	19.3333	20.5	18.8333	18.3333	20.5	22.5
58	Vulnerable	1	1	1.5	1.5	0.5	2	0.5	0.5	0	2	2.5	3.33333	3.5	2.83333	10.8333	10.8333	8.33333	5.83333	7.83333	7.33333	9.66667	6.83333	13	9.16667
107.667	Vulnerable	7.5	1.5	3.5	8	10.5	11.5	13	13.5	13.5	12	16.5	19.1667	20.3333	20.8333	18	17.1667	18.3333	15.5	16.3333	15.3333	18	17.3333	18.1667	18.3333
108.5	Vulnerable	3.5	3	7.5	8	8.5	13.5	14.5	14	15	19	19.8333	10.8333	20.8333	20.3333	18.8333	18.1667	20.3333	17.8333	18.5	17.1667	19.1667	18.1667	18.0833	18
102	Vulnerable	0	0	2	0	1	2	1	0.5	0	0	0.333333	2.83333	6.83333	8.5	5.33333	4.83333	5.16667	18	15.3333	16.5	17	17.5	17.1667	16.3333
112	Vulnerable	2.5	1	1.5	0	1	1.5	1	0.5	0.5	2	2.16667	4.16667	6.16667	4.83333	12.1667	9.33333	17.5	16.3333	20.5	17.6667	16.3333	18.8333	20	17.1667
155	Vulnerable	1.5	1.5	1	2	0	2	1.5	1.5	4	4	21	18	19	21.3333	23	23.5	24	24.1667	27	24.3333	25.8333	24.5	28.3333	24.6667
11.6667	Resilient	1	1.5	0.5	0	0	1	1	1.5	1	1	2.33333	1.16667	1.5	1.5	1.33333	1	1	0.5	1.5	1.16667	1.66667	1.16667	2.16667	2.5
31.3333	Resilient	2	1	2	0.5	0	0.5	1	1	0.5	1.5	4.66667	1	1.16667	1	1.5	1.33333	0.666667	1.83333	7	2.83333	5.83333	7.83333	2.83333	5
0.333333	Resilient	1	0.5	0.5	0	0	0	0	0	0	0	0	0	0.166667	0.333333	0	0.333333	0	0	0	0	0	0	0.166667	0
1.66667	Resilient	0.5	0.5	0	0	0	0	0.5	0	0	0	0.166667	0.166667	0	0	0	0	0	0	0	0	0	0	0.833333	0
134.667	Vulnerable	1.5	0.5	1	1.5	2	1.5	1.5	1	2	2	9.5	0.666667	11	10.5	12.5	10.3333	10.6667	7.83333	11.8333	10.8333	15.6667	20.3333	23.3333	23.6667
128	Vulnerable	2.5	1	3	4	5.5	7.5	7	2.5	5	3	13.3333	14.3333	18	20.8333	16.6667	21	19.8333	20.6667	20.8333	21.8333	20.1667	20.8333	17.8333	25.3333
128	Vulnerable	0.5	1	0	0	0	0	1	2	0.5	0	8.5	7.33333	8.5	5	6.66667	15.1667	18.3333	19.6667	19.8333	18.1667	19.1667	21.3333	21.8333	20.8333
0	Resilient	0.5	0	0	0	0	0	0	0.5	0	0	0.166667	0	0	0	0	0	0	0	0.166667	0.166667	0.166667	0	0	0
134	Vulnerable	1	3	8	15.5	11	20.5	22	30	27	26.5	19.6667	18.6667	20.8333	20.8333	21.1667	19.8333	19.6667	21.5	21.5	21.8333	20.3333	21.8333	22.8333	22.3333
144.667	Vulnerable	0	0.5	0	0.5	1.5	3	3	3.5	28	2.5	17	15	18	20	19.1667	20.1667	20.8333	23.1667	22	22.8333	21.8333	23	23.6667	25.6667
144.667	Vulnerable	15.5	18	20.5	18.5	1	3	7.5	20.5	30	24	20.3333	19.8333	18.8333	19.5	22.1667	19	21.5	21.3333	21.1667	20.5	20.8333	23.3333	23.5	25.5
9.33333	Resilient	1	0.5	0	1	2	1	0.5	1	0	0	1	0.166667	0.333333	0.166667	0.333333	0.166667	0.333333	0	0	1.16667	1.33333	2	0.166667	2.5
143.333	Vulnerable	1.5	2	5.5	3	1	11.5	9.5	18	14.5	17	20	22.3333	21.6667	20.8333	20.3333	20	21.3333	24	23.6667	22.3333	21.3333	24.3333	22	25.3333
126	Vulnerable	0.5	0	0	1	0.5	2.5	2	2.5	31	16	18.5	17	19.6667	20	21	20	20.6667	19.8333	19.8333	20.6667	21.1667	21.8333	21.1667	20
78.3333	Vulnerable	0.5	1	0	0	0	0.5	0.5	0	0	0	0.166667	0	0	0	0.166667	0.166667	0.166667	0.166667	0	0.166667	0.333333	6.16667	12.5	20.5
128.333	Vulnerable	1	3	6.5	1	0.5	11.5	12	18	21	19	19	19	18.5	17.8333	16	18.6667	21	20.8333	21.3333	19.6667	19.6667	20.6667	21.1667	22.3333
133.333	Vulnerable	1	0.5	0	0	0.5	0.5	1	1	1.5	1	8.83333	17.6667	17.1667	17.3333	18.3333	17.3333	19.1667	19	21	20.6667	19	21.6667	21.5	23.5
84.6667	Vulnerable	0	0	0	0	0	0	0	0	0	0	0.5	0	0	0.5	0.166667	15.6667	9.83333	11.6667	13.8333	12.5	11.1667	13.6667	14.3333	14.3333
74	Vulnerable	2	0.5	0	0	0	0	0	0.5	0	0	1.16667	0.166667	14.6667	19.8333	21.3333	14.8333	15	16.1667	15.6667	17.3333	4.5	3	17.6667	16.3333
126.667	Vulnerable	2.5	1	0	1	2	12.5	2.5	2.5	12	11.5	5.16667	6.33333	10.8333	9.83333	12.8333	17.3333	16.1667	13.1667	20	19.5	18.5	22.3333	20	21
171.667	Vulnerable	1	0	2.5	1.5	21	23.5	17	20.5	19	19	18.5	20.1667	21.6667	20.3333	19.5	30.6667	25.1667	26.1667	25.6667	26.5	22.6667	26	28.8333	31
131	Vulnerable	0	0	2	1	1.5	5	14.5	3.5	10	2	11.6667	17.5	13.5	27.1667	30.8333	29.6667	18.5	10.1667	24.5	15.5	18.5	22.1667	21.6667	21.6667
24.3333	Resilient	13	11	4.5	6.5	5	1	8	1.5	0.5	0.5	2	8	4.83333	3.5	1.66667	0.5	8.83333	2.83333	6.83333	4.33333	11.3333	3.33333	6.66667	2.16667
119.333	Vulnerable	1.5	1.5	1	5	1.5	4.5	5	8	4.5	4	1.33333	3.33333	0.666667	0.833333	14	7.16667	7.66667	13	18.5	19	19.3333	20.3333	21.5	17.8333
0.333333	Resilient	2	1.5	0	0	0	0	0	0	0	0.5	0.666667	0.333333	0.166667	0.5	0.333333	0.166667	0.333333	0.166667	0	1.16667	0	0.166667	0	0
134.667	Vulnerable	0	0.5	0.5	0.5	0	0.5	0.5	4	12.5	2.5	8.5	2.16667	17.5	36.3333	27.5	10.3333	22.8333	20.8333	26.3333	25.6667	19.5	21.8333	22.1667	23.3333
89.6667	Vulnerable	26.5	4.5	1	0	0.5	1	1.5	1	3.5	14	15.5	17.1667	16	14.5	13.8333	14.1667	14.5	15.6667	14.5	16.5	14.1667	14.6667	14.5	15.6667
129.333	Vulnerable	1	2	1	0.5	0.5	0.5	2	0.5	1.5	1.5	0.666667	1	19.6667	19.8333	20.6667	34.1667	22.1667	24.0833	26	22.1667	19.8333	23.8333	18.5	22.3333
126.667	Vulnerable	2	6.5	16	12	4.5	6.5	6	7.5	10	13	20	24.8333	11.6667	23.8333	19.8333	29.8333	20.8333	10	5.16667	19	19.3333	18.8333	21	23.5
1.33333	Resilient	2	0.5	1	0	0	1.5	0	1	0.5	0.5	0.833333	0.333333	0.166667	0.166667	0.666667	0	1	0.166667	0.833333	0.5	0.166667	0	0.333333	0.333333
9.66667	Resilient	0.5	1.5	1.5	4	2.5	5.5	3.5	3	6	9.5	3.16667	4.5	2.66667	5	2.66667	3.66667	4.33333	3.5	1.16667	2.83333	1.66667	2.16667	1.66667	1
147.667	Vulnerable	1	1.5	1.5	2	0.5	1	0.5	2	0.5	0.5	1.16667	1.33333	1.5	1.66667	15.5	4.5	16.5	10	10.1667	20.5	21	24	23.6667	26.1667
0.333333	Resilient	0.5	0.5	0.5	0.5	0.5	2	2	2.5	4	7	17.5	12.8333	20	17.1667	15.8333	17.1667	17.1667	16.5	0	0	0	0.166667	0	0
64.6667	Vulnerable	1	1	0.5	1	0	0.5	1	0.5	1.5	1	0.5	0	0.333333	0.666667	1.16667	0.666667	0.166667	0.333333	0.333333	16.8333	14.3333	16	7.5	8.83333
120.667	Vulnerable	14	6	3.5	8.5	4.5	1.5	2	1	0	1.5	7.83333	10.8333	8.33333	12.6667	16.3333	17.6667	17.8333	17.1667	15.6667	17.8333	18.5	19.3333	20	21
154.333	Vulnerable	2	6.5	9	6.5	7	6.5	7	7.5	8	7	11.1667	15.3333	19.8333	21.5	24	21.4167	18.8333	21.8333	5.83333	24.5	23	24	24.5	28.6667
102.333	Vulnerable	0	0.5	0	1	0	0	0.5	0	0	1	0.333333	16.1667	17.8333	18	16.3333	14.5	14.8333	14.5	16	16.5	15.5	16.6667	17.8333	16.6667
0	Resilient	1.5	1	1	0	0	0.5	0	0.5	0	0.5	0.5	0	0.166667	0	0	0.166667	0	0.166667	0	0	0	0	0	0
145	Vulnerable	0	1	2.5	1.5	1	1.5	1.5	3.5	4.5	4	5.66667	10.3333	12.8333	7.5	11.6667	19.5	16.5	20.8333	20.1667	22.1667	22.5	23.6667	24.1667	24.6667
130.667	Vulnerable	0.5	1	2	1.5	0	2.5	1	0.5	1	1	1.83333	2.66667	2.83333	2.66667	5.16667	6.16667	4	7.5	6	14.5	18	20.1667	21.8333	23.3333
0.333333	Resilient	3	0.5	1.5	0							0.666667	0.333333	0.5	0.166667	0.166667	0.166667	0.166667	0	0.166667	0.333333	0	0	0.166667	0
144.667	Vulnerable	0	0	0	0	0	0.5	1	0.5	1	2	3.16667	6.83333	12.5	8.5	10.5	21.6667	21.1667	17.6667	20.8333	25.3333	21	22.6667	21.8333	27.8333
98	Vulnerable	1.5	1	1.5	1.5	1	3	0.5	0.5	0	0	0.166667	0.166667	0.5	0.5	1	1.33333	1	0.833333	1.83333	20.5	3.83333	15.5	16.8333	16.6667
70.6667	Vulnerable	0.5	1	0.5	0	0.5	1.5	0.5	0.5	0	1	0.166667	1	1.83333	6.66667	6.83333	8.66667	4.33333	15.3333	17.5	19.3333	19.3333	10.6667	14	10.6667
138.667	Vulnerable	3	2.5	2.5	2	13	19.5	18	22.5	19	25	20.5	12.8333	15.1667	22.8333	19.3333	19.8333	26.1667	25	26	30.8333	19	20.3333	26.8333	22.1667
10.3333	Resilient	0.5	0	0	0	0	0	0	0	0	0.5	1.16667	1	1.16667	2.66667	3.83333	3.79167	3.75	3.66667	2.83333	2.33333	2	1.5	2.83333	0.833333
155.667	Vulnerable	0	1.5	3	1.5	5	16	11.5	13	6	9.5	17	18.6667	24.8333	21.8333	23.5	19.1667	20.8333	19.6667	21.8333	24	20.1667	25.5	25.1667	27.1667
11.6667	Resilient	2.5	2	2	1.5	3.5	3	2	2.5	1	1	7.66667	7.5	5.66667	6	3.75	1.5	4.33333	4.33333	4.83333	4.66667	3.33333	2.33333	0.833333	2.66667
109.667	Vulnerable	0.5	2.5	7	10.5	11	9	10	9	5.5	7.5	12.5	12.3333	12.8333	18.3333	19.5	17.3333	18.3333	19.5	19.5	17.3333	17.8333	17.8333	19.5	17.5
113.333	Vulnerable	2.5	3	0	12.5	14.5	18.5	15.5	16	15.5	16.5	16.6667	18.3333	17.3333	18	20.1667	18	20.1667	20.1667	19.3333	20.3333	19.1667	18.1667	19.3333	19.1667
93	Vulnerable	12	17.5	20	19.5	16.5	14	17.5	6.5	17	17.5	17	16	16	16.6667	17.3333	14.6667	16	18	16.1667	18.8333	16.3333	14.8333	15.8333	15.8333
42.3333	Resilient	1.5	0.5	0	0	0	0	0.5	0.5	0.5	0	7.16667	4.33333	1.83333	2.5	9.33333	7	3.66667	8.33333	5.33333	6	6.5	7	9	5.16667
7	Resilient	2	2.5	0	0	0.5	0.5	1.5	1	0	0.5	1	0.5	1	1	1.66667	1.66667	1.66667	2.16667	1.5	1.83333	1.66667	1.33333	1.16667	1
88.3333	Vulnerable	1	1	3	4	28	13.5	16	17.25	18.5	18	17.6667	14.6667	16.1667	16.5	17.5	15.6667	16.1667	17.5	16.8333	17.6667	14	13.3333	14.1667	16.6667
36.1667	Resilient	1.5	2.5	4.5	6	2	7	10	13	9.5	8.5	13.8333	15.8333	16.6667	16.3333	17	14.8333	13.3333	12.6667	12.5	10.6667	5.83333	6.91667	8	3.16667
109	Vulnerable	0.5	4.5	6.5	11.5	7.5	13	10.5	11	8.5	12	3.5	6.16667	4.16667	7.66667	10.5	10.6667	13.3333	14.8333	14.5	14.8333	16	17.8333	17.8333	18.8333
71.3333	Vulnerable	1.5	2	1	0.5	0	1	0	0	0	0	0.5	1.5	4.16667	7	3.66667	7.91667	12.1667	9.16667	10.1667	11.1667	10.5	12.3333	13.1667	10.1667
143	Vulnerable	2.5	1.5	2	5.5	6.5	3.5	2.5	4.5	9	11	17.3333	14.5	17.1667	17	18.3333	18	16.8333	18.5	18.5	21.6667	24.1667	25.1667	22.5	23.8333
118	Vulnerable	0.5	0	0	0.5	0	1	0.5	1	1	0.5	9	12.1667	10.6667	14.8333	21.5	17.6667	18.1667	20.5	20.3333		3.16667	19.6667	19.6667	19.6667
95	Vulnerable	2	0	0.5	0	0.5	0	0.5	1	2.5	0.5	9.33333	8.66667	17	15.8333	24.5	24	24.6667	24.1667	25.1667	26	30.3333	28.8333	2.83333	15.8333
108.5	Vulnerable	0.5	0.5	1	0	0	0.5	1	0.5	0.5	0	0.5	0.166667	0.5	0.333333	1	1.33333	0.833333	8.58333	16.3333	21.3333	16.6667	18.1667	18	18.0833
44	Resilient	1	1	1	1	2	10	5	8.5	7	5	8.5	6.83333	6.33333	6.16667	6.66667	5	3	6.16667	5	2.5	3.33333	12.3333	2.33333	7.33333
71	Vulnerable		7	4.25	1.5	2	1	0.5	0.5	1	1	1.5	0.833333	7.83333	5.5	3.5	3	2.5	6	2.5	8.5	9.41667	10.3333	12.3333	12.8333
114.333	Vulnerable	0	0.5	0	1	0.5	1	0	0	0	0	0.666667	6.5	6	19.8333	19.5	21.3333	15.6667	23.8333	20.5	17.5	14.5	19	19.3333	18.8333
131.667	Vulnerable	2	2	0.5	1	0.5	2	1	0.5	1.5	0.5	1.16667	1.33333	2.83333	13.8333	15.8333	13.3333	15.1667	17.8333	18.8333	17.6667	18.3333	23	21.8333	21
139	Vulnerable	5.5	7.5	3	15	10	9.5	17.5	17.5	33.5	24.5	7.66667	23.5	23.5	13.5	3.5	2.66667	22.3333	24.5	22	22	22.3333	19.8333	24.1667	25.5
154	Vulnerable	5	3	2	1	1	2.5	3.5	1.5	1.5	0.5	1.83333	9.83333	10.3333	12.5	14.6667	13.6667	19	23.1667	16.5	10	20.6667	27.5	20.1667	29.3333
135.333	Vulnerable	0	1	1	0	0	1	0	0.5	0	0	0.5	1.83333	19.6667	16.6667	20.8333	19.5	24.6667	29.1667	22	29.8333	27	26	26.5	15.1667
11	Resilient	11	1.5	0.5	0	0.5	0.5	0	1	1.5	0.5	4	0.833333	0.166667	0	0	0.166667	0.5	1.5	0.5	0.5	1.16667	1.83333	2.83333	0.833333
2	Resilient	0.5	0	0	0	0.5	0.5	0.5	0	0.5	1	1.16667	1.16667	0.666667	0.5	0.5	0.166667	0.333333	0.166667	0.166667	0.666667	2.83333	0.5	0.333333	0.166667
2.33333	Resilient	0	0	0	0	0	0.5	0	0	0	0.5	0	0	0	0	0.166667	0	0	0.166667	0	0	0.166667	0.666667	0.333333	0.166667
64	Vulnerable	0.5	0	0.5	0.5	0.5	0	0.5	0.5	0	0	0.666667	0.833333	0.333333	0.166667	0.166667	0.5	0	0.166667	0.666667	11.8333	15.3333	11.8333	12.1667	8
60	Vulnerable	0	2	0	0	0	0	0	0.5	0.5	0	5.33333	5.33333	0.5	0.5	9.33333	2.5	4.83333	3.16667	1	7.16667	1.66667	1.66667	14.1667	14.1667
27.6667	Resilient	0	1	0.5	0.5	0	0.5	0.5	0	0.5	0	2.83333	1.5	0.666667	2.33333	2.66667	1.66667	0.833333	0.833333	0.666667	0.5	1.16667	1.33333	0.666667	11.8333
95.6667	Vulnerable	1.5	0.5	2	2	0	3	1	3	4	4	5.16667	4.66667	6.5	8.66667	12.5	11.5	11.6667	13	12.3333	13.1667	14.3333	17	15.3333	15.5
3.66667	Resilient	1	1	0	0.5	0	1	0	0.5	0	0	0.333333	1	0.333333	0.666667	0.333333	0.166667	0.666667	0.166667	0.166667	0.166667	0.333333	0.5	1	0.333333
99.3333	Vulnerable	1	2	0.5	1.5	1	3	2.5	5.5	6.5	4.5	7.66667	8	8.33333	11.1667	14.3333	13.75	13.1667	13.8333	15.3333	14	17.1667	16.3333	16.6667	16.6667
2	Resilient	1	1.5	1	2	0.5	1.5	1	1.5	1.5	0.5	1.16667	1.5	1	1.16667	1	0.5	0.333333	0.5	0.333333	0.333333	0.5	0.166667	0.666667	0.166667
87.6667	Vulnerable	1.5	0	0	0	0.5	11	11.5	12.5	12.5	5.5	10.3333	10.3333	10.5	13.6667	14.3333	12	11.3333	10.6667	11.8333	13.3333	14.5	13.8333	14.8333	15.1667
110.333	Vulnerable	1.5	1.5	7.5	12.5	13	14.5	14	13	13	0.5	16.6667	15.5	10	16.1667	18	15.1667	15	14.5	15.1667	16.3333	18.3333	17.8333	17.5	19.8333
0.666667	Resilient	0	0	0	0	0.5	0.5	0	0	0	0	0.5	0	0	0.166667	0	0	0	0	0	0	0.166667	0	0.166667	0.166667
85.3333	Vulnerable	2.5	0.5	0.5	0.5	0.5	0.5	1	0	0.5	0	0	0.833333	4.5	10.6667	13.5	12	12	12.6667	13	13.8333	13.8333	15	14.3333	13.3333
0.666667	Resilient	0	1	0	1	0	0	0	0	0	0	0	0	0.166667	0	0	0.333333	0.166667	0.166667	0.166667	0	0	0.166667	0	0.166667
2.66667	Resilient	0.5	0	0	0	0	0	1	1	0.5	0	0	0.166667	0.166667	0.333333	0.333333	0.333333	0.666667	1.16667	4.5	5	8.66667	1.33333	0	0
0.666667	Resilient	0	0.5	0	1	0	0	0.5	0	0.5	0	0	0.166667	0	0.333333	0.333333	0	0	0	0	0	0.166667	0.166667	0.166667	0
14.3333	Resilient	2	1.5	2.5	1.5	4	9.5	8	5.5	6	2	3.66667	2	2.66667	0.833333	1.33333	1.5	0.666667	2	0.833333	0.333333	2.83333	3.33333	3.33333	0.5
109.333	Vulnerable	0.5	0	0.5	0	0.5	0	0	0.5	0.5	0	0.5	0.5	0.333333	0.166667	6.16667	9.33333	6	10.5	5.33333	16.1667	16.5	18.6667	17.8333	18.1667
138.333	Vulnerable	2	1	2	1.5	0	0.5	0	1	0.5	0	10	16.6667	15.6667	11.1667	20.1667	18.1667	17.8333	18	20.1667	2.66667	21.5	22	24.1667	23
49	Resilient	1	1.5	0	0	0	1	0	0.5	0.5	0.5	0.166667	0.166667	0.166667	0.166667	0.5	0.5	0.666667	0.333333	0.333333	0.333333	1.66667	5.66667	11.5	7.33333
70.3333	Vulnerable	4	1	2.5	2.5	0.5	2	0.5	0	0.5	0.5	2.5	3.66667	1.16667	1.83333	1.83333	1.16667	1.66667	1.33333	1.83333	1.83333	10.8333	7.66667	10	17.5
6	Resilient	2	1.5	0	0.5	2	1.5	1.5	2.5	1	1	1.33333	2.16667	1.5	2.33333	0.833333	0.666667	0.333333	0.833333	0.333333	1	0.666667	1.5	1.16667	0.333333
120.333	Vulnerable	1	2.5	1.5	1	0.5	0.5	1.5	2	3.5	3	10	7	10.8333	14.3333	15	14.1667	13.5	15.1667	15	15.5	18.5	19.1667	20.3333	20.6667
87.6667	Vulnerable	0.5	1	1	0.5	0	1	1	0	3	1	6.5	7.66667	2.33333	8.33333	8	10.5	7.83333	8.66667	8.16667	11.8333	11.8333	13	14.5	16.3333
134.333	Vulnerable	1	0.5	0.5	0	0.5	0.5	0.5	0	0.5	0	3.5	4	2.66667	8.5	16.1667	16.3333	18.6667	17.8333	17.6667	20	23	22.6667	21	23.5
192.333	Vulnerable	1.5	0.5	0	0.5	1	1	1	1	1.5	3.5	19.8333	18.1667	20.3333	23.8333	22	21.3333	21.8333	24.5	27.5	27	33.1667	15.8333	34.3333	46
0.333333	Resilient	0	1	1.5	1.5	4	0.5	3	0.5	1	0.5	0.833333	1.16667	0.166667	0.333333	0.5	0.333333	0.166667	0	0	0.333333	0	0	0	0.166667
83	Vulnerable	1	1	1	1	0.5	0.5	0.5	0	0.5	0.5	1	2.66667	2.33333	1.66667	3	1.83333	2	2.5	1.83333	1	11.6667	12.5	13	16
147.333	Vulnerable		0.5	1	0	1	10	20	14.5	23	25	23.3333	18.6667	20.1667	20.3333	25.1667	21.5	23.1667	24.1667	25.8333	25.8333	23.6667	26.3333	24.6667	22.6667
127	Vulnerable		0	0	0.5	1	0.5	0	0.5	0	1.5	0.333333	0.333333	0.333333	0.833333	1.16667	5.16667	6.66667	4.66667	3.66667	11.3333	12.8333	15.3333	21.3333	26.8333
119	Vulnerable		3.5	2.5	2.5	1.5	1	5	5.5	8	7	16.6667	13.8333	15.3333	17.5	17.6667	18.3333	18.8333	16.6667	17.1667	18.5	20	20	20.1667	19.3333
141	Vulnerable		3	1	1	0.5	0.5	0	2.5	1	0	0.833333	0.666667	0.5	13.1667	6.5	16.8333	20.3333	26.1667	8.83333	29	19.6667	8	20.1667	42.3333
132.667	Vulnerable		0.5	0	0	0.5	0	0.5	0	0	0.5	1	1.33333	1	2.33333	1.83333	0.833333	7	19.6667	24.8333	30.6667	36.3333	24.3333	27.1667	14.8333
0.666667	Resilient		0	0	0	0	0	0.5	0	0	0	0.333333	0	0	0	0	0	0	0.166667	0	0.166667	0.5	0	0.166667	0.166667
83.6667	Vulnerable		7	14	17	12	14.5	17.5	19	18	17.5	12.8333	12.8333	14.8333	14.6667	14.6667	13.8333	15.3333	15.3333	13.3333	16.8333	12.6667	13.8333	14.1667	13.8333
111.333	Vulnerable		4	3.5	14.5	15.5	16.5	18.5	20.5	24	23	18.1667	17.3333	17.5	18.1667	17.3333	18.6667	18.8333	19.3333	19.8333	18.8333	21.3333	21.1667	17.6667	16.8333
148.333	Vulnerable		4	2	1.5	0	27	13	17	16	15	18.6667	19.1667	20	18.1667	23.1667	21.1667	22.1667	24.1667	23.1667	22.8333	21.5	21.1667	21.3333	31.6667
136.333	Vulnerable		0.5	0	0	0.5	0	0	0	0	1	0.666667	3.83333	1	10	9.83333	15.6667	14	18.1667	20.1667	18.5	21	21	23.6667	23.5
79	Vulnerable		1	0.5	0	0	0.5	0.5	0	0	0	0.333333	0.333333	2	2.33333	5	7.66667	13.3333	9.66667	9.16667	7	10.8333	11.8333	18	9.66667
74.6667	Vulnerable		0.5	0	1	0	0	0	0	0.5	1	2	3.5	8	9.16667	11.5	13.5	12.3333	12.1667	14.3333	13.8333	12.5	11.8333	10.3333	15.1667
103	Vulnerable		1	0	0.5	0.5	0.5	1	0.5	0.5	1	1	0.666667	10.3333	17	17.6667	20	18	20.8333	20.3333	21.6667	22	20.6667	20	10.8333
81.3333	Vulnerable		0	0	0	0	0	0	0	0	0	5.16667	6.83333	4.66667	4.16667	3.33333	4	7.5	5	11.8333	10.6667	12.5	11	16	13.6667
117.333	Vulnerable		0	0	8	44.5	25	4	17	22.5	23	21.1667	18.8333	16	20	20.8333	20.3333	20.6667	18.3333	20	20	19.3333	19.8333	19.3333	19.5
135	Vulnerable		0	3	0	0	0	0	0	0	0	0.333333	0.333333	0.666667	0.166667	0.166667	7.33333	7.5	10.8333	19	10.1667	21	30.5	15.3333	21.6667
57.3333	Vulnerable		0.5	0.5	1.5	10	6.5	9.5	17.5	11.5	17.5	9.83333	15.6667	8	10.1667	9.16667	6.5	8.33333	5.83333	11	6.16667	11.1667	12.8333	10.1667	5.66667
134.333	Vulnerable		13	9.5	10.5	17	20.5	28.5	29	24.5	22.5	19.6667	20.8333	19.1667	19.5	21.6667	19.8333	20.8333	20.8333	20.5	19.3333	20.1667	22.5	21.6667	23
85.6667	Vulnerable		1	0.5	1	7.5	2.5	1.5	2	2	1	2.33333	0.666667	13.6667	5.33333	14.8333	12	9.16667	5.66667	2.16667	11.6667	22.3333	14.3333	8	20.5
97.6667	Vulnerable		18.5	8.5	11	14.5	17	16	20.5	18.5	19.5	14.8333	11.6667	13	11.6667	14.8333	14.6667	14.3333	16.1667	16.6667	17.1667	15	16.6667	15.8333	16.3333
73	Vulnerable		3.5	3.5	6	19.5	12.5	14.5	16.5	14.5	11.5	18.3333	18.5	14.1667	13.5	18.6667	16.1667	16.5	15.6667	16.8333	18.8333	17	13.1667	7	16.3333
98.3333	Vulnerable		1	0	0.5	0	2.5	0.5	8	15.5	14	12.5	12.8333	11.8333	11.3333	14.5	13.3333	13.3333	11.6667	14.6667	7.66667	14.6667	14.1667	17.5	17.5
86	Vulnerable		0.5	1	0	0	0	0	0.5	0.5	1	1.83333	5.5	1.5	1.5	12	8.83333	6.66667	2.33333	6.83333	13.6667	13.1667	12.1667	14	16.8333
88	Vulnerable		5	3	4.5	9	9	9.5	19	16	17	10.1667	11.1667	9.5	10.6667	18.8333	15.3333	16.6667	16.5	15.3333	15.6667	15	16	13.3333	14.6667
104.333	Vulnerable		0.5	0.5	0	0	0.5	1	0	0	0	1	1.33333	1.5	6.16667	12.1667	8.33333	14.1667	11	16.1667	17.5	15.8333	16.6667	17.3333	18.1667
3.66667	Resilient		0	0	0	0	0	2.5	1	1	2	0.666667	1	0.833333	0.333333	1.83333	1.5	1.5	0.833333	1.66667	1.83333	0.666667	0.5	0.333333	1
75.6667	Vulnerable		0.5	1.5	0.5	1.5	2.5	1.5	0	2.5	1.5	1.5	2	2.33333	4.33333	2	1.83333	2.33333	7.83333	8.33333	10.8333	11.6667	12.6667	13.5	11.6667
87.6667	Vulnerable		0	0.5	0	0	0	1	0	0.5	0	8.5	10.3333	14	11.5	15.1667	15.6667	15.3333	15.8333	15.6667	14.6667	14.5	15	15.5	13.3333
106.333	Vulnerable		0.5	0	0	0	0	0.5	0.5	0.5	0	0.333333	0.333333	1.16667	0.5	3	4.16667	11.1667	15.8333	15.1667	15.1667	16	17.5	17.8333	17.8333
29.3333	Resilient		0	1.5	3	2.5	1	2.5	6	1.5	0.5	2.66667	4.16667	5.5	5.33333	4.33333	2	2.66667	3.83333	4.83333	5.83333	7.33333	6	3.16667	5.5
111.667	Vulnerable		13	13.5	13	14.5	16	20	21.5	22.5	21.5	23.3333	19	18.5	19.3333	20.6667	18	17.1667	21	19.5	18.1667	18	18.6667	19.1667	18
117	Vulnerable		2	2.5	0.5	2.5	8	10	8.5	12.5	8.5	17.1667	17.1667	17.3333	16.5	18	17.3333	19.1667	19.6667	18	8	18.1667	19.8333	19	19.6667
86.3333	Vulnerable		0	1	8.5	12	3.5	5.5	4.5	2.5	1	4.33333	1.66667	4	2	3	8.16667	1.5	15	3.33333	14.1667	13	11.5	14.1667	17.5
61.6667	Vulnerable		35	30.5	10.5	9	21.5	23	24.5	27	24.5	19.1667	14.1667	12.1667	10.1667	13	11.5	11.8333	15.6667	14	15.3333	13.8333	10	6.66667	14.1667
72.6667	Vulnerable		0	0.5	2.5	4	5.5	4.5	1	2.5	4	7.16667	9	8.66667	12.3333	14.6667	15.1667	11	12	13.6667	16.8333	17.6667	13	7.83333	15.5
94.3333	Vulnerable		29	1.5	2.5	2	0.5	1.5	0	0.5	0.5	0.166667	5.66667	1.5	4.16667	12.8333	16	17	17.3333	17.5	17.8333	19.8333	20.6667	9.33333	17.1667
117	Vulnerable		6	2	6.5	12	17.5	18.5	19.5	18.5	17	16.6667	17.6667	18.1667	17.3333	19.8333	17.6667	19.3333	20.3333	20.5	19.8333	19.3333	20.6667	19	18.8333
105.333	Vulnerable		6.5	2	1.5	0	4	8	1.5	4	1	9.66667	10.5	10.6667	12	15.8333	17.1667	18	17.1667	4.16667	19.3333	18.3333	18.8333	18.3333	15.5
107.667	Vulnerable		0	0.5	0.5	0.5	2.5	2.5	1	1	0.5	6.83333	9.33333	12.8333	10	14.5	13.1667	15.8333	17.1667	19.1667	21.1667	16.5	19.3333	17.3333	17.1667
0	Resilient		0.5	0	0	0.5	0.5	1	0.5	0	0	0.333333	0.333333	0	0	0	0	0	0	0	0.166667	0.166667	0	0	0
68.3333	Vulnerable		2	3	3	7.5	4.5	7	8	6.5	5	4.16667	3.66667	3.33333	2.83333	2.5	3.83333	2.66667	7.16667	3.83333	7.5	12.8333	14.1667	11.3333	8.66667
86.6667	Vulnerable		1.5	2	2	3	15	21.5	16	15	13.5	15	12.6667	13.3333	13.1667	13	13	14.6667	15.6667	16	14.8333	13.6667	14	14.8333	14.5
113.333	Vulnerable		4	3	2	3	1	10	14.5	18.5	16	19.1667	20.5	20.8333	18.3333	21.1667	19.3333	18.5	21.5	21.3333	22.6667	21.3333	20.8333	18.3333	17.5
119	Vulnerable		1	0.5	0	0.5	2	0	0	0	0	4.5	9.33333	10.3333	12.5	15.6667	16.3333	16.3333	18.3333	20.1667	17	15.3333	19.6667	20.5	19.3333
21	Resilient		1	0.5	0.5	1.5	0	1	0	0	0	0.5	0.5	0.666667	1.33333	1.16667	5.33333	3.83333	4.33333	3.5	2.83333	3	3.66667	2.83333	4
103.667	Vulnerable		1	1.5	1.5	3.5	8.5	15	11	23.5	18.5	13.1667	17.3333	17.1667	17.6667	16.6667	17.3333	18	18.1667	17	15.3333	15.3333	16.3333	18.1667	17.3333
103.333	Vulnerable		0	1	0	1	2	4	2.5	3	3	14.5	13.5	19	18.1667	15.5	13.8333	9.5	11.8333	16	15.6667	13.6667	17.1667	17	17.5
92.6667	Vulnerable		1	0.5	0	0	1	0	1	1	1	5.5	5.83333	4.83333	2.66667	8	11.8333	6	6.16667	5.5	12.5	9.66667	10.1667	17.5	18.6667
87.3333	Vulnerable		0.5	0.5	0	0	1	0.5	1	0.5	0.5	0.666667	0.666667	0.333333	0.5	1	3.66667	4.33333	12.8333	1.16667	18.6667	16.6667	17.1667	10.6667	15.8333
13	Resilient		1.5	1	1.5	0.5	0.5	5	3	5	2.5	6	2	1.66667	1.33333	2.16667	1.66667	2.5	3.83333	0.333333	2.16667	0.166667	1.5	1.16667	3.83333
118.667	Vulnerable		10.5	18.5	17	7	13	14	15	16	20	14.3333	16.1667	19.3333	16.8333	18.3333	19	19	18.1667	18.6667	19.5	20	20	19.3333	20
117.667	Vulnerable		0	0	0	0	0.5	0	0.5	14	17	11.3333	19.1667	22.8333	26.8333	23.1667	20.8333	24.3333	24.6667	24.1667	23.5	28	22.1667	23.5	13.1667
4.33333	Resilient		0.5	0	1	0.5	2	2.5	0	1.5	1	0.833333	3.66667	4.83333	11.1667	11.8333	13.5	18.1667	28.5	16.8333	19.3333	1.33333	0.333333	0.666667	1.16667
123.333	Vulnerable		2	0.5	1.5	1	0	0	0	1.5	2.5	2.66667	4.66667	1	3.5	7.16667	3.5	2.66667	13.5	12	16.3333	12.1667	27.3333	16.1667	18.1667
153	Vulnerable		2	9.5	4.5	0.5	12.5	17	15	27	25	21.1667	20.5	38.8333	23.6667	18.3333	22.1667	21.3333	20.6667	19.6667	21.1667	24.6667	23.6667	29.3333	23.5
192	Vulnerable		0.5	0.5	0	0	0.5	0.5	0	0.5	1	0.166667	0.166667	0	0.333333	0.166667	5.16667	17.5	26.6667	20.1667	20.1667	22	22.6667	41.6667	31.6667
70	Vulnerable		1.5	2.5	1.5	1	2.5	9.5	3.5	10	6	5.33333	6.83333	5.66667	4.83333	6.66667	11.8333	12.3333	16.8333	14.5	13.6667	15.1667	7.66667	14.6667	12.6667
95.3333	Vulnerable		1	1.5	0	0	3	1.5	2	4.5	6	2.5	4.33333	10.1667	13.8333	11.5	15.1667	16.8333	17.5	17.6667	17.3333	18	16.5	16.1667	15
40.3333	Resilient		0	0.5	0	0	0	0.5	0	0	0.5	0.166667	0.5	0	0	0	0	0	0.166667	0.166667	0.166667	0.333333	5.5	6.66667	8
148	Vulnerable		12	11.5	8	5.5	14.5	11	19	21	20	21.5	22.8333	24.5	22.6667	21	23.8333	29.1667	29.6667	24.3333	23.3333	26.6667	26.8333	23.6667	23.5
10	Resilient		4	2.5	3	0.5	25.5	26.5	40.5	46	40	25.8333	36.1667	25.6667	33.3333	15.1667	26.6667	26.1667	26.3333	1.83333	1.5	0.333333	1.5	1.66667	1.83333
110.333	Vulnerable		5.5	19.5	26.5	25.5	23	25	31	22.5	27	17.5	18	19.1667	16.6667	19.3333	20.1667	20	22	17.3333	18	19.6667	20.6667	19.6667	14.8333
182	Vulnerable		1	2	3.5	2.5	6	16	8	18.5	19	15	17	15.6667	23	20.5	21.5	23.8333	27.6667	24.6667	25.1667	28.6667	27.1667	36.3333	27.5
27	Resilient		0.5	0.5	0.5	0	0.5	0.5	0.5	1	2	8.16667	11	7.5	7.66667	9.66667	18.6667	19.5	21.5	26.1667	23	23.3333	2.16667	9.16667	2.16667
75	Vulnerable		2.5	0	0	0	1.5	0	0.5	12	12.5	9.66667	11.3333	11.1667	12.3333	13.3333	14.6667	15.1667	11.8333	13.3333	13.3333	13.1667	13.1667	11.5	12.8333
122.333	Vulnerable		9	13	28	23	26	26.5	23.5	21	23.5	18	19	19.8333	18	20.8333	23.3333	23.1667	23	55.8333	18.8333	22.1667	20.3333	19.8333	21
109.333	Vulnerable		1.5	1	1	0.5	1	3.5	1.5	1	3	8.83333	2.16667	0	10.3333	7.16667	12.1667	14.5	18.1667	15.3333	13.6667	14.5	16.5	19	19.1667
137.667	Vulnerable		0	0.5	0	0	54	37.5	23.5	22.5	16	23.6667	21	22.3333	19.1667	22	22.1667	21.6667	23.3333	19.5	20.5	23.1667	25.3333	22.6667	20.8333
172	Vulnerable		4	6.5	5.5	4.5	29.5	27	31.5	28	11	10	11.5	17.3333	32.3333	17	17.5	19.5	22.8333	21.6667	19.3333	18.8333	20	20	46
60.6667	Vulnerable		1	0	0	0	1	0.5	0	4	1	2.5	0.666667	4.5	2	4.16667	10.8333	9.33333	5	7.66667	14.5	8.66667	10	11.1667	9.16667
121	Vulnerable		0.5	1	5	1	2.5	1.5	1	0	1.5	1.5	15	16.1667	12.8333	13.1667	13	14.5	16.3333	17.3333	19.3333	18.3333	21.1667	20.5	18.8333
103.667	Vulnerable		13	14	11	18.5	18.5	15.5	10	16.5	14.5	12.6667	13.3333	14.1667	14	13.1667	13.3333	16.8333	18.5	18.5	17.5	20.3333	18.1667	18	15.6667
119.667	Vulnerable		13.5	17.5	18.5	14.5	17	14.5	15.5	19.5	16.5	17.5	19.3333	15.5	16	17.8333	17.8333	18	18	17.1667	19	20	20.1667	20.5	19.1667
116.667	Vulnerable		13.5	13.5	13.5	25	20.5	25	21	21	18.5	14.5	16	19.1667	16.6667	17.3333	15.6667	16.1667	17.8333	18.8333	15.8333	16.8333	16.8333	21	20.5
133.667	Vulnerable		5.5	2	2	2	8.5	17	10.5	15.5	12.5	13	13.3333	14.6667	13.6667	18.1667	23.8333	17.3333	19.8333	18.5	22.3333	23.1667	21.8333	25.1667	19.8333
112	Vulnerable		0.5	0	0.5	0.5	4	3	1.5	18	21.5	7.16667	16.3333	18.5	18.3333	19.5	17.1667	17.3333	17.6667	16.6667	17.6667	19.3333	21.3333	16.8333	17.8333
116	Vulnerable		20.5	9.5	8.5	17.5	17.5	21	22	20	24.5	18.5	14.3333	17.6667	16.8333	16.3333	18.6667	17.6667	17.6667	18	5.33333	20	19.6667	19.5	18.8333
72.3333	Vulnerable		11.5	8.5	3	3	13	9	12	9.5	10	6.5	6.66667	8.33333	7	5.66667	15.5	12.5	15.5	11.5	11.6667	10.1667	9.33333	14	12.8333
53	Vulnerable		1.5	1.5	2	3.5	6	6	1.5	2.5	1.5	1	3	5.83333	6.33333	13.1667	14.8333	16.5	19.8333	17.5	14.3333	17.6667	21.8333	2.66667	2
6.33333	Resilient		4.5	5	1.5	1	3	3	3	5.5	3.5	1.83333	1.33333	1.83333	0.5	0.5	0.333333	0	1	1.66667	1.16667	1.16667	0.5	1.5	1.16667
10	Resilient		1.5	2.5	2	2	10.5	7	4	5	2.5	1.16667	1.16667	3.16667	8	5.16667	6.16667	6.66667	10.6667	11.6667	37.1667	53.6667	2.33333	1.83333	0.833333
2.66667	Resilient		5.5	3	3	6.5	7.5	7	4.5	4	2.5	2.66667	1.5	1.66667	1.16667	1	0.5	1.33333	0.666667	1.33333	1.16667	1.16667	0.333333	0.666667	0.333333
101.333	Vulnerable		0	0	0.5	0	0	0.5	1	1	0	0.166667	0.333333	0.333333	0.166667	0	0.166667	0.333333	2.16667	23.6667	4.83333	10.3333	16.5	16.5	17.6667
115.667	Vulnerable		10.5	9	10	10	8.5	6	10	16	14	0	16.6667	18.5	17.3333	14.8333	17.6667	18	17.6667	18.5	19.6667	19.5	20.1667	19	18.6667
2.66667	Resilient		0	0	0	0	4	0.5	0	2	0	0.5	0.5	0.333333	0.166667	0.333333	0.333333	0	0	0.166667	0.166667	0	0.333333	0.5	0.5
87.3333	Vulnerable		1	0.5	0	0.5	0.5	1.5	2	43.5	6	1.83333	0.333333	0.5	0.166667	2.33333	1.16667	2.83333	10.8333	10.8333	13	15.8333	14.5	14.3333	14.8333
88.6667	Vulnerable		10.5	15	14.5	12.5	14.5	11.5	11	12.5	14	12.8333	12.8333	16.8333	12	16	7.33333	14.6667	17	14.1667	16.3333	3.5	12.5	17.3333	14.5
93.6667	Vulnerable		12	9.5	9.5	10	11	13	15	13	15.5	12.8333	13.3333	12	11	13.6667	11.6667	14.6667	17.6667	17.1667	16.8333	12.1667	15.1667	15.3333	16.3333
61.3333	Vulnerable		0.5	0.5	1	4	2	2	1.5	0.5	0	1.16667	0.333333	4.33333	0.333333	6.83333	7	1.16667	11	10	8.83333	9.66667	8.83333	12.6667	9.16667
72.3333	Vulnerable		3	2	2	2	10.5	8	7.5	9.5	9.5	10.5	9.33333	10.1667	4.16667	13.5	15.8333	15.6667	18.1667	13.3333	9.33333	1	9.5	17.1667	9.5
58.6667	Vulnerable		6	6.5	8	6.5	9.5	9.5	10.5	5	2	7.66667	4.5	6.16667	2.16667	5.16667	4.66667	1.5	9.83333	2.5	4.33333	3.33333	1.66667	14	13.6667
3.66667	Resilient		0	0.5	1	0.5	0.5	1.5	0	1	0	1	1	1.5	1.33333	1.33333	0.5	0.333333	1.16667	1.5	0	0.333333	0.5	0.666667	0.666667
8.66667	Resilient		1.5	2	1	1.5	3	1.5	2.5	2.5	3	2.16667	4.5	7.5	4.66667	2.16667	1.33333	1.5	2.16667	1.66667	1.16667	1.16667	1.16667	2.16667	1
124.333	Vulnerable		1.5	3	3	2.5	3.5	4	7	7	5.5	6.16667	10	12.8333	16.8333	18.3333	18.1667	17.3333	20.1667	18.1667	18.8333	21.1667	21.3333	19.1667	21.6667
46.3333	Resilient		5	6.5	2.5	4	6.5	8	6	7	5	7.83333	9	9.83333	14.3333	16.5	17.5	7.33333	19.1667	18	17.3333	14.3333	16.8333	5.66667	0.666667
133.667	Vulnerable		17.5	6.5	9	12	11	16.5	30.5	24	32	20.5	18.1667	19.1667	14.3333	13.5	17.5	19.3333	21.3333	20.1667	22	20.3333	21.6667	21.1667	24
114	Vulnerable		5	4	3	4.5	8	6.5	7	10	7	11.3333	16.1667	13.5	10.6667	12.6667	11	13.8333	18.1667	17.5	16.8333	15.3333	18.1667	18	20.8333
75	Vulnerable		2.5	2	2	2	2.5	3.5	2.5	3	6.5	7	5.5	12.3333	8.33333	13	14.1667	16.1667	11.5	9	10.5	10.5	9.66667	15.3333	12.5
31	Resilient		0.5	0	0	0	0	0	0	1	0.5	1.66667	0.166667	1.5	4.16667	3.83333	3	0.5	1.66667	5	4	4.83333	5.5	4.66667	5.33333
67.6667	Vulnerable		10.5	10.5	10	10	16	21	32	20	17	15.5	16.3333	17.3333	11.6667	19	17.6667	16.3333	25.1667	7.5	8.16667	8.33333	7	13.1667	13.6667
66.3333	Vulnerable		2.5	2	2	2.5	9	5	3.5	8.5	5	6.33333	8	8.66667	11	11.8333	11.3333	9	39.1667	11.8333	10	8.33333	9.66667	12.1667	11.3333
96.3333	Vulnerable		1	0.5	1	5	7.5	10.5	0.5	7	11.5	6.66667	8.83333	13.1667	7.5	11.5	14.5	14	13.1667	42.3333	12.1667	13	15.1667	16.3333	16.6667
101.333	Vulnerable		5	5.5	3.5	4	5.5	2.5	0.5	6.5	15.5	13.6667	13.8333	15.5	12	13.1667	14.1667	15.8333	15.6667	13.8333	14.1667	13.8333	15.5	18.3333	16.8333
89.6667	Vulnerable		0	1	0.5	42	19.5	11	15	17	18	9.66667	13.8333	15	15.8333	16	16.5	16.5	17.1667	15.6667	13.8333	15.5	12.3333	16.5	16
62.6667	Vulnerable		5.5	1.5	5.5	3	5.5	3.5	1	1.5	3.5	4.83333	4.33333	6	5.33333	5.5	9.66667	6.5	3.66667	4.5	3.5	4.5	5.33333	8.83333	17.1667
72.6667	Vulnerable	0	1.5	0.5	1	1.5	2	0.5	2	3	6	56.3333	62.8333	13.3333	11.5	11.6667	11.8333	13.6667	15.5	18.3333	15.1667	15.5	14.5	10.5	11.3333
175	Vulnerable	0.5	1	0	1.5	0	13.5	19	17.5	17	12	20.6667	23.6667	26.5	29.5	25.3333	27.8333	26.1667	26.1667	28.6667	27.6667	25.8333	28.6667	31.5	27.3333
135.333	Vulnerable	1.5	0	0	0	0	0	0.5	0	0	0	0.5	0.666667	0.833333	2.16667	3.16667	1.83333	11	9.16667	10.1667	15.3333	17	19.5	24	24.1667
143	Vulnerable	1	0	0	0	0	1	2	4.5	2	10	4.16667	2	2	6.83333	2	0.333333	10.3333	10	11.6667	13.5	18.5	22.6667	24	24.8333
85.3333	Vulnerable	0	0	0	0	0	0.5	0	0	0	0	0.666667	1.16667	12.3333	8	12.1667	10.8333	15.6667	17.5	17	28.3333	10	10.8333	17.1667	14.6667
47.6667	Resilient	41	18.5	19	20.5	25	25.5	21.5	9.5	14.5	9.5	33.6667	22	15.3333	31.3333	46.1667	19.8333	20.6667	18.6667	22.3333	24.6667	3.5	0.833333	5.83333	17.1667
129.333	Vulnerable	1.5	1.5	1.5	2.5	1	4	3	8.5	11	15	17.3333	17.6667	14.5	18.5	10.3333	9.5	8.66667	12	13.8333	16.1667	19.8333	18.8333	22.8333	23
149	Vulnerable	3.5	6	0.5	1	1	1.5	12	12	7	12	22.5	19.8333	35.5	37	25	28.6667	26.1667	29.6667	28.3333	32.8333	27.1667	22.1667	26.1667	26.1667
40.3333	Resilient	1	0.5	2	1.5	3	7.5	16	11.5	17	18	12	18	15.8333	19.5	15	18.8333	1.16667	16.6667	15	16.5	14	6.33333	7	6.83333
133.667	Vulnerable	1	1	3.5	1	4.5	17.5	41.5	24.5	13.5	15	10.3333	14.3333	14.5	16.6667	18.8333	44.6667	17.3333	22	18.5	21	22.1667	21.1667	23.3333	22.3333
134.667	Vulnerable	0.5	0.5	0	7.5	7	7	3.5	3.5	4	3	4.5	6.33333	15.5	6	11.8333	9	11.1667	14.1667	17.3333	17.1667	20.5	19.8333	22.6667	24.8333
114.333	Vulnerable	1	2	2.5	2	21	15	18.5	26	20.5	20	18	16.8333	15.8333	18.8333	17.1667	18	20.5	21.1667	22.8333	22.3333	19.5	18.6667	19	19.5
44.6667	Resilient	3	0.5	0.5	1	0	1.5	2.5	3.5	5.5	5	9.83333	5.33333	6.5	0.833333	0	2.5	0.333333	0.333333	10.6667	11.6667	6.66667	4.66667	5	12.6667
105.333	Vulnerable	2.5	2.5	1	1	1.5	1.5	6.5	12	12.5	17	14.5	14.1667	17.5	19	16.5	11.3333	12.6667	13	14.8333	17.6667	17.1667	17.1667	17.6667	17.8333
1.33333	Resilient	0	0	0	0	0	0	0	0	0	4.5	2.16667	0	0.666667	0.166667	0	0	0.166667	0	0	0.5	0.166667	0.333333	0	0.333333
6	Resilient	5.5	3	5.5	3	2	3	2.5	2.5	1	3	2.16667	2.33333	1.5	1.5	2	0.666667	1.66667	1	1.5	1	0.833333	1.16667	1	0.833333
25.6667	Resilient	1	0.5	0	1	0	2	4	3.5	6.5	4.5	7.33333	7.33333	6.33333	5.66667	1.5	4.5	5.66667	7.66667	2.66667	10.3333	6.16667	5	6.33333	1.5
86.6667	Vulnerable	1.5	0	2.5	2	4	18	17	14	14	14	14.5	14.6667	15.8333	16.5	15.6667	14	16.5	18.3333	18.8333	18.3333	19.1667	16.6667	17.5	9.16667
84.6667	Vulnerable	1	2	1	5.5	9.5	9.5	12.5	11	9.5	11	10.6667	10.8333	4.83333	5.33333	7.83333	13.8333	14.8333	13.5	14	13.8333	13.1667	13.3333	14.3333	14.6667
129.667	Vulnerable	0	1.5	0	2	1.5	1.5	3	9.5	13	21	17.1667	15.8333	7.5	20.8333	21.3333	21.5	24	23.8333	30	28	26.5	15.1667	26.1667	23.5
108	Vulnerable	5.5	9	12	13.5	3.5	16.5	17	23	20.5	21.5	17.1667	18.1667	17	15	18.1667	17.1667	17.8333	19.5	21.5	19.8333	20.3333	15.6667	20.6667	17.6667
150.333	Vulnerable	4.5	2	1	0	3.5	5.5	4	9.5	25.5	20	20.8333	20.8333	22.3333	22.8333	20.8333	20.6667	21	21	21.3333	22.1667	23.5	24.6667	24.8333	25.6667
169	Vulnerable	3.5	1	1	0.5	1.5	1.5	3	4	3	13	21.5	3.33333	2.5	16.8333	23.8333	19	21.3333	22.5	25.1667	27.5	27.3333	28.6667	29.5	26.3333
68	Vulnerable	0	0.5	0	0.5	1	4.5	0.5	2	1	1	1	0.5	0.333333	0.666667	3.5	5.5	9	9.16667	0.166667	12.1667	14.5	6.16667	12.5	15.3333
122.667	Vulnerable	3.5	0.5	0	1.5	2	4	6	5.5	4	6	15.5	14.6667	17.1667	16.6667	15.3333	20.6667	22.1667	21.6667	25	15	27.6667	15.1667	14.8333	31.3333
4.66667	Resilient	4	8.5	4	4.5	3.5	5	3.5	4.5	5.5	5.5	2.16667	1.33333	1.16667	1.5	1.5	1	0.666667	0.333333	1	1.16667	0	0.666667	1	0.666667
2	Resilient	26.5	7	6	1	1.5	3	1	0	0.5	0.5	0.5	0.333333	1.5	0.666667	0.833333	0.166667	0.333333	0.333333	0.333333	0.166667	0	0.333333	0.333333	0.333333
67	Vulnerable	2.5	2.5	2.5	2.5	1	1.5	2	0	1	3	2.5	3.5	3.83333	2.66667	5	4	5.5	5.16667	5.16667	7.83333	7.16667	7.16667	11.8333	14.5
113.333	Vulnerable	0	1.5	6	5.5	8	9	9	0	9	12	19.1667	12.6667	18.8333	19.5	16.8333	18.5	19.3333	16.1667	14.8333	18.1667	16.6667	18.5	16.6667	21.5
108.333	Vulnerable	3.5	0	1.5	2	1	12	11.5	0	17	18	17.1667	15	15.5	16	16.3333	7.66667	15.8333	16.1667	16.5	19.3333	18.3333	18.5	17.5	18.1667
124.333	Vulnerable	5	5.5	6	5.5	5.5	6.5	8.5	0	7.5	10.5	17	9.83333	10	14	23.6667	21.1667	18.8333	17.5	17.1667	23.1667	20.6667	21.5	20.6667	20
108	Vulnerable	2.5	1.5	7.5	13.5	1.5	15.5	20	0	18	19	17.3333	16.8333	16.3333	16	13.5	16.5	16	15	15.1667	16.8333	16.1667	18.1667	18.5	17.3333
79.6667	Vulnerable	0	0	0	0.5	0	0	0	0	0	0	0.166667	0.166667	0.5	0.166667	0.333333	5.83333	8	13.3333	14.3333	14.8333	12.3333	13	12.3333	14.5
127.333	Vulnerable	4	4	3.5	2.5	1	4.5	4.5	4	2.5	2	1.66667	2	2.66667	2	2	2.33333	5.66667	4	5.83333	16.5	17	19	23.8333	20.8333
126	Vulnerable	7	4.5	2.5	1	1.5	1	14	4.5	6	4	12.6667	11.3333	18.5	20.5	20.6667	20.6667	20.6667	21.8333	21.1667	19	20.6667	21.5	22	19.5
2	Resilient	3	3	1.5	1.5	1.5	4	2	0	1.5	1.5	2.33333	0.666667	1	0.666667	1.66667	0.333333	1.5	0.666667	0.166667	0	1	0.5	0.166667	0.333333
95.6667	Vulnerable	0	0	0	1	0.5	2.5	5.5	2.5	4.5	7	7.5	6	5.5	4	5.5	3.33333	5.33333	6.5	4.16667	10.8333	18	16.5	15.3333	16
16	Resilient	5.5	19	5	6.5	12.5	13	14	14	16	18	29	12	22.3333	6.66667	16.8333	5.16667	3.66667	3.16667	2	4	2.66667	4.16667	2.16667	1.66667
100.667	Vulnerable	1.5	1.5	10	6	11.5	7.5	2.5	4	6.5	10	11	11.6667	12.3333	13.5	15	15.6667	15.6667	16	16.8333	17	16.6667	16.5	16.5	17.3333
24.3333	Resilient	2.5	0	2	0.5	0	4	8.5	11	8.5	10.5	9.16667	9	10.1667	10.5	11.5	12.5	13.3333	14.5	15.1667	18.1667	12	4.5	4.33333	3.33333
67.6667	Vulnerable	0	1	3	3	3	5.5	6	5	3.5	4.5	16	18.6667	14.8333	4.5	2	9.33333	11.5	11.8333	12.1667	11.8333	13.3333	15.5	15.6667	2.66667
97	Vulnerable	0	17.5	2	2.5	2.5	5	5.5	4	3.5	6.5	9.5	7.33333	7.83333	10.1667	15.3333	14.6667	15.1667	14.6667	15.1667	15	15.8333	15.5	16.1667	16.8333
112.333	Vulnerable	2.5	2	0.5	2.5	1.5	2.5	1.5	2	0.5	1	1.33333	1.66667	2.16667	4.16667	7.83333	10.3333	12.8333	16.1667	17	18	17.8333	14.6667	20	21.5
86.6667	Vulnerable	0	3.5	12	10	7.5	9.5	12	15.5	17	21.5	19.5	15.8333	15.3333	14.5	13.1667	14	15.5	15.8333	10.1667	14.8333	14.5	15	14	14.3333
0	Resilient	0	0	0	0	0	0.5	0	0.5	0	0	0.5	0	0.166667	0.166667	0.166667	0	0	0	0.166667	0	0	0	0	0
108	Vulnerable	0.5	2.5	1	1	1	5	2	3.5	3	2.5	8.16667	10.8333	12	14.3333	14.8333	16.3333	17.3333	16.6667	17.5	15.8333	17.5	17	18.1667	18.8333
86.3333	Vulnerable	3.5	2.5	2	3.5	2	3	3.5	2.5	3	2.5	1.33333	1.66667	2.83333	4	3.16667	5.83333	5.33333	6.66667	9.66667	11.1667	13.6667	15	14.3333	13.8333
97.6667	Vulnerable	4.5	4	5	4.5	4	8	7.5	8.5	6	3.5	7.16667	3.16667	4.83333	4.5	3.5	4	6.5	7.83333	9.5	15.1667	13.8333	16.1667	16	16.6667
96.3333	Vulnerable	1	3.5	4.5	0	10	10.5	13	14.5	10.5	9.5	10.6667	11.5	9.83333	9.5	9.33333	11.5	10.8333	14.1667	15.1667	16.1667	14.8333	15.6667	16.1667	16.3333
116.333	Vulnerable	6	8.5	5.5	6.5	10	11	12	0	10.5	14	12.1667	12.8333	14.5	19.8333	18.3333	17.6667	17.5	12.1667	17	18.8333	16.8333	18.1667	18.3333	21.6667
89	Vulnerable	1	1	0.5	0	0.5	40	28	0	13	13.5	12.5	4.83333	4.33333	3	16.1667	3.83333	14.6667	2.16667	14.1667	14.3333	13	12.6667	16.1667	15.6667
132.333	Vulnerable	48.5	46.5	29	26	27.5	26	26	29	28	29	21.1667	18.5	22.8333	21.8333	21.8333	21.5	19.3333	21	22.3333	21.6667	21.1667	22	22.8333	21.3333
70.3333	Vulnerable	1	15	17	20.5	22	17	13	13.5	14	14	12	14	13.5	11.8333	11.8333	11.3333	11	10.8333	12	14.5	12.8333	11.1667	11	13
93.6667	Vulnerable	1.5	0.5	0.5	17	14.5	17	15	19.5	20.5	18	16.3333	16	16.8333	16.5	16.5	18.6667	20.1667	21.5	18.6667	17.3333	18.1667	16.1667	16.5	14.1667
88	Vulnerable	35.5	13.5	4	17.5	22.5	21.5	16.5	15.5	22	19	44.3333	21.5	16.8333	16.5	16.5	15.8333	17.6667	17.8333	17.1667	13.5	14.5	15.3333	13.1667	15.5
97.6667	Vulnerable	0	1	0	0.5	1.5	2	2.5	11.5	14	11.5	10.1667	15.3333	15.5	15	15	17.1667	17	16.5	13.8333	14.1667	16.3333	15.1667	16.3333	17.3333
98.3333	Vulnerable	1	4	2	4	0.5	1.5	2	0.5	1.5	1	1.5	14.3333	12.3333	13.6667	13.6667	17.3333	17.6667	8.16667	13.8333	15.8333	15.3333	15.6667	16.1667	17.3333
123	Vulnerable	0	3.5	2	2	3.5	8	15.5	5	6	5.5	8.5	10.1667	11.6667	13	13	19.1667	16.3333	17	16.5	17	16.5	19.1667	21.6667	20.6667
199.667	Vulnerable	1.5	9.5	5.5	12	5	18	11.5	15.5	18.5	17	17.6667	18.1667	18.5	20.8333	20.8333	21.5	19	19.8333	18.5	17.3333	18.3333	61	18	20.8333
115.333	Vulnerable	13	13.5	13	13.5	12	16	3	14	14	15.5	20	14.8333	16	15.8333	15.8333	17.5	16.3333	16.3333	17.5	19	16.3333	18.3333	19.6667	19.6667
35.6667	Resilient	0	1.5	4	13	18	11	15.5	14.5	16	14.5	12.3333	11.6667	13.5	7	7	9.16667	12.5	9.66667	7	7.83333	4.5	7.5	5.33333	5
109.333	Vulnerable	2	0	0	0	0.5	0	6	3.5	2	4	3.5	6.5	4.33333	10.3333	10.3333	33	14.1667	27.3333	15.1667	18.3333	19.1667	22	20.8333	11.8333
145.333	Vulnerable	0.5	1	4.5	11.5	21	17.5	20.5	21	18	21.5	21.6667	16.8333	18.3333	18.6667	18.6667	21.6667	21.1667	18.5	20	24.8333	21.1667	23.6667	25.1667	23.8333
63	Vulnerable	5.5	14.5	11.5	12.5	10	9.5	11	11	11	11.5	9.16667	9.33333	10.1667	10	10	10	10.5	10.6667	10	9.5	9.33333	10.6667	10.1667	10.6667
94	Vulnerable	1	4	1	26	21	9	16	21.5	21.5	19	18.6667	20.5	19	18	18	21.5	21.1667	22	19.1667	17.3333	17	17.3333	14.5	15.1667
88.6667	Vulnerable	0	0.5	0	0	0	0	0	0	0	1	0.333333	1.33333	3.83333	3.33333	3.33333	11	5	5	16.1667	16	13.6667	12.5	17	14.8333
2.66667	Resilient	0.5	1.5	0.5	0	0.5	0.5	0.5	0	0	0	0	0.166667	0.333333	0.166667	0.166667	4.66667	3.83333	2.33333	1.16667	1.5	12.6667	0.166667	1.16667	0
3.33333	Resilient	0.5	2	0	0	1.5	1.5	0.5	0	0	1	2.66667	4	3.5	0.833333	0.833333	0.666667	1.33333	1.5	1.16667	2	1.33333	0.166667	1	0.5
73.3333	Vulnerable	2	3	1.5	6	6.5	13.5	11.5	13	9	19	26.5	19.6667	8.83333	14.6667	14.6667	5.66667	20	16.6667	19.3333	17	9	7.16667	16.6667	12.8333
143	Vulnerable	0	1	0	1.5	1	2	3	1	0.5	0.5	18	15.5	17.3333	16.1667	16.1667	22.6667	19.5	25	20	19.8333	19.5	23.6667	24.1667	23.6667
101.333	Vulnerable	3.5	4	3	4.5	6.5	6	2.5	6	3.5	6	12.8333	9.83333	12	12.6667	12.6667	15	15.8333	16	16.3333	17.5	16.6667	15.5	19.1667	16
72.3333	Vulnerable	1	0	4.5	4	8	14	16.5	10	10	17	14.6667	13.1667	15.1667	5.83333	5.83333	14.6667	10.6667	15.5	8.16667	12.6667	9.83333	11.3333	10.8333	14
68.6667	Vulnerable	0	1	5	11	15	1	10.5	12	0	0.5	15.5	13.5	13.3333	13.1667	13.1667	13.6667	12.5	11.8333	11.8333	10.5	10.5	10.8333	12	11.5
136.333	Vulnerable	18.5	12.5	30	12	18.5	25.5	31.5	56	62.5	52.5	25.5	21.3333	31.6667	24.5	24.5	30	27.1667	38.3333	28.6667	26.6667	24.8333	27.5	24.6667	16
33.6667	Resilient	1.5	1	0	1	4.5	5.5	8	8	6	3	2	1.66667	4.83333	1.33333	1.33333	0.166667	0	0	0.333333	0.5	0.5	12.6667	0.5	3.66667
4	Resilient	0.5	0.5	1	2	9.5	6	5	3.5	2.5	2	5.16667	3.83333	1.5	1.83333	1.83333	1.33333	0.333333	2	0.666667	2.16667	1.83333	0.333333	0.833333	0.833333
6.66667	Resilient	5	2.5	1	4	1	5	2.5	2.5	1.5	2	2.83333	2.83333	1.66667	0.666667	0.666667	0	0.666667	0	0.333333	0.333333	0.5	1.5	1.16667	0.666667
74	Vulnerable	2	1.5	1	1	1	1.5	1.5	0	2	2	2.66667	6	8.66667	7.33333	7.33333	10.3333	13	15	13.8333	14.6667	11.5	12.8333	11.1667	13
98	Vulnerable	5	8	10	12.5	21	0	18	17	16.5	23.5	15.5	15.1667	13.6667	14.6667	14.6667	18.3333	21	21.1667	19.8333	21	18	17.3333	16.3333	15.3333
81.6667	Vulnerable	2.5	3.5	4.5	9	3.5	4.5	9	14.5	14.5	14	13.8333	13.8333	12.5	12.5	12.5	11	11.6667	13	16.8333	13.1667	13	13.1667	13.6667	14
92	Vulnerable	15	1.5	0.5	2.5	2	3	5.5	2	2.5	0.5	4.66667	8.83333	11	9.83333	9.83333	14.3333	15.3333	16.1667	16.3333	15.3333	15.6667	15.6667	14.8333	15.5
38.6667	Resilient	0.5	0.5	1	1	2	0	0.5	1	0.5	0.5	0.833333	0.666667	0.833333	0.666667	0.666667	0.5	0.5	0.166667	0.333333	2.33333	7.83333	3.16667	9.5	6.66667
72.3333	Vulnerable	3	3	4.5	2.5	1.5	2.5	3.5	4	2.5	3	6.66667	13.3333	16.1667	11.8333	11.8333	13.1667	13.1667	15.6667	9.16667	12.1667	13.3333	15.5	12.5	8.16667
102.667	Vulnerable	1	11.5	19.5	11.5	10	10.5	12.5	16.5	16.5	19	17.1667	18	19.3333	17.6667	17.6667	15.8333	15.5	16.6667	16.6667	17.5	16.5	16.8333	18	16.5
80.6667	Vulnerable	0	1.5	8.5	9.5	10	8.5	5	9.5	9.5	8.5	11	11	12.3333	12.8333	12.8333	11	13.5	16.1667	9.5	13	13.1667	13.1667	13.1667	14
87.6667	Vulnerable	8	5	1.5	3	6	3	6	3.5	1	1.5	4.83333	1.16667	1	0.833333	0.833333	0.333333	1.16667	1.16667	1.16667	6.16667	14.5	13.8333	14.1667	15.8333
43	Resilient	1	1	1	5.5	4	2	4	2.5	1.5	1.5	3	6.33333	6.83333	4.5	4.5	5.16667	5.83333	7.5	6	6.83333	8	6.83333	7.66667	7
103.667	Vulnerable	0	0	2	7.5	2	1	2.5	2	2	1.5	0.666667	1.16667	5.66667	12.5	12.5	17.8333	19.5	22	21.8333	20.5	15.8333	16.6667	17.6667	17.5
4	Resilient	1	2	0.5	2	1.5	0	1.5	1.5	1.5	0	0.5	0.166667	0.333333	0.833333	0.833333	0.666667	0.166667	0.5	0.333333	0.166667	0	0.5	0.666667	0.833333
100	Vulnerable	1.5	2.5	1	1.5	1	2.5	4	9	11.5	10.5	11.3333	11.3333	12.6667	12.6667	12.6667	14.1667	14.1667	14.6667	15	15.1667	16.5	16.1667	17.5	16.3333
111.333	Vulnerable	5.5	9.5	6	3.5	4.5	13	5.5	9	7	2	3.66667	6.5	8.66667	7.16667	7.16667	8.66667	10.3333	12.5	11.8333	11.6667	18	16.8333	18.6667	20.1667
100.333	Vulnerable	1	2.5	2.5	5.5	4	14.5	9	12.5	11.5	15	16	12.5	12.3333	14.6667	14.6667	14.6667	15.5	18	18.6667	19.5	18.1667	16.5	16.5	17.1667
85	Vulnerable	3	3	2	3	1.5	5	3	4.5	8.5	4.5	7	4.5	5.83333	5	5	14.5	13	17	9.83333	16.5	13.6667	15.6667	11.5	15.3333
112.667	Vulnerable	3.5	18.5	6	4	2.5	7	10	14.5	14	16.5	16.6667	16.3333	14.5	15.8333	15.8333	15.8333	15.8333	18.6667	18.1667	19.1667	18.6667	18.5	18.3333	19.5
1.33333	Resilient	0	0	0	0	0	0	0	0.5	0	0	0	0	0	0	0	0	0	0	0	0.166667	0.166667	0.333333	0.166667	0.166667
115.333	Vulnerable	1.5	2	2.5	3.5	7.5	10.5	9	12	12	17	11.1667	7.16667	13.6667	17.3333	17.3333	13.1667	20.5	27.6667	18.8333	19.3333	20.6667	18	19.8333	19.8333
96	Vulnerable	1	0.5	0	1.5	0	2	8.5	10.5	10.5	10	9.16667	11.3333	12.8333	14.8333	14.8333	11.3333	12.5	13.8333	14	13.1667	15.3333	15.5	15.1667	17.3333
89.3333	Vulnerable	2	3	1	1.5	1	1	1	1.5	3	6	4	4.16667	5	6.33333	6.33333	11.8333	14.3333	14.5	16	15.3333	14.6667	14.6667	15.6667	14.3333
117	Vulnerable	0.5	3	6.5	5	4.5	8.5	8	12	12	9	14.8333	18	20.1667	14.1667	14.1667	15.8333	18.6667	22.5	18.8333	17	18.1667	19.6667	18.8333	20
1.33333	Resilient	9.5	4.5	2	2	1	1	2	1	2.5	0.5	0.666667	0.5	0.5	0.5	0.5	0.333333	0.666667	0.833333	0.166667	0	0.166667	0.333333	0.333333	0
109	Vulnerable	1.5	1	5.5	1.5	1	1	2.5	2	2	3	4.16667	7	9.5	10.8333	10.8333	14.1667	15.5	15.3333	16.8333	17.6667	15.6667	18.6667	18.6667	17.1667
98	Vulnerable	0.5	1	3	1	3	25		14	19	17.5	12.3333	11.3333	10.8333	11.5	14.3333	14.1667	14.8333	15	15.3333	18.5	16.3333	16.6667	16.1667	16.1667
97	Vulnerable	0	0	0	0	0	0		0	0	0	0.5	6.83333	0.5	1	12.5	13.1667	14	9	13	49.8333	18.8333	14.8333	17.5	16.1667
105.333	Vulnerable	0	0	9	2	7.5	0.5		8.5	9	10	11.8333	11.5	11	12.1667	14.6667	15.1667	14.8333	15.6667	16.6667	15.5	16.5	17.1667	16.8333	18.6667
55	Vulnerable	0	0.5	1	0	1	0		0	0	0	1.5	3.5	5.66667	9.66667	12	16.5	11.6667	3.83333	6.66667	2.83333	7.66667	3.83333	8.16667	15.5
122	Vulnerable	3	9.5	20	13	12	11.5		11	17	15	12.6667	17	16.6667	14.3333	16.1667	18.3333	19.6667	19.1667	19.5	20.1667	18	20	20.8333	20.1667
89	Vulnerable	0	0	0	0	0	0		0	0.5	0	1.66667	0.666667	0.666667	2.16667	1.83333	2	4.33333	8.83333	8.16667	12.3333	5.83333	8.83333	12.5	23.1667
1	Resilient	0	0	0	0	0	0		1	1.5	0	1	0.333333	0	0.833333	0.833333	0.166667	0.166667	0	0.833333	1.66667	0.5	0.166667	0.166667	0.166667
86.6667	Vulnerable	0	0	0.5	3.5	0.5	0		0	0.5	0	0.333333	6.66667	12.5	10.5	18.3333	17	15.6667	13.8333	14.6667	17.3333	15.1667	16	17.3333	10
125	Vulnerable	0	1	1.5	14.5	18	13.5		17	15	14	19.5	15	14.8333	16.3333	16	13.5	13.6667	15.8333	16	17.3333	16.8333	21.6667	20.1667	20.6667
42	Resilient	6.5	0	0	0	0	0		0	0	0	0	0	0.166667	0	8.33333	13.3333	13	12.1667	12.3333	10	5.66667	4.66667	6	10.3333
107.333	Vulnerable	0.5	0	0	0	0	0		2.5	1.5	17	26.5	12.8333	14.1667	15.6667	14	15.3333	13	15.6667	16.6667	17.8333	16.5	17.1667	18	18.5
137.667	Vulnerable	0	0	0	0	0	0		0.5	1	0	1	0.666667	0.5	0.833333	13.5	18.6667	24.1667	23.3333	22	22.6667	23.1667	22.6667	23	23.1667
54	Vulnerable	1.5	0.5	4.5	7	5.5	7		9	7	7.5	6.83333	6.83333	7.5	7.66667	9.16667	9.66667	9.33333	9	8.66667	9.5	8.33333	8.83333	8.5	9.66667
21.3333	Resilient	0	0	0	0	0.5	0.5		0	0.5	0	1.16667	1.16667	0.333333	0.5	7.5	1.33333	0.666667	0.833333	1.33333	3.16667	4.16667	5	1.16667	4.5
97	Vulnerable	0	0	0.5	0	0	0		0	0	0	0.5	9.83333	12	10.8333	16.6667	13.6667	16.8333	17.6667	16.3333	14.8333	16	15.1667	16.8333	16.5
64.3333	Vulnerable	0	0	0	0	0	0		0	0	0	3.16667	0	0	0	9.66667	5	3.5	2.5	17.5	16.5	4.5	11.8333	8.66667	11.6667
119.667	Vulnerable	0.5	1	4	4	0.5	0		14.5	0.5	10	9.16667	10.3333	12	14.1667	19.8333	9	11.8333	22	23.8333	19.5	16.5	18.6667	21	20.1667
111.667	Vulnerable	0.5	0.5	0	5	17	18.5		27	22	25.5	17.3333	13.1667	14.8333	18.8333	17.1667	14.1667	18.5	20.1667	19.3333	20.8333	16.3333	20	18.6667	17.1667
136	Vulnerable	4	11.5	6.5	6	8.5	10		9.5	10.5	14.5	10.8333	12.8333	13.8333	17	18.1667	18.8333	18.8333	19.8333	19.1667	19.6667	20.1667	22	21.8333	24.1667
130.667	Vulnerable	1	4	15.5	14.5	14.5	14.5		12.5	14.5	12	11	12.8333	12.1667	14.6667	15.6667	14.8333	15.6667	17.1667	17.1667	19	17.3333	19.3333	21.5	24.5
133	Vulnerable	1	1	6.5	19	12.5	13.5		18	18	17.5	15	13.3333	13.1667	18.5	19.5	20	18.1667	19.1667	20.6667	19.5	20.8333	22.5	21.3333	22.6667
7.33333	Resilient	2	0.5	1	1.5	2	7		12.5	11.5	15	5.16667	2.33333	8.33333	6.33333	5.16667	3	12	6	8	7.16667	4.5	2.83333	0.5	0.333333
10.3333	Resilient	0	0	0.5	23	18	9		7.5	18	15.5	11.6667	11.5	10.8333	13	16.1667	3	1	4.16667	17.8333	15	1	4	0.333333	0.833333
77.6667	Vulnerable	0	0.5	1	1	9.5	13		14.5	10.5	11.5	13.1667	11.8333	11.6667	13.8333	13.3333	12.6667	12.8333	14	14.6667	14.8333	14.6667	16.6667	15.1667	7
91.6667	Vulnerable	1.5	1.5	4	4	5	5.5		7.5	7.5	6.5	5	8.5	11.6667	13.8333	15.8333	15.1667	15.5	14.6667	15.3333	16.5	15.5	16	15.3333	14.5
22.6667	Resilient	0.5	0	0.5	0	0	0		0	0	0	0.333333	1.83333	3.5	4.16667	15.8333	8	8.5	3.33333	2.83333	6.83333	4.16667	4.5	4.16667	2.66667
16	Resilient	1.5	1	3	7.5	4.5	2		4.5	5	5.5	5.33333	5.16667	9.83333	10.8333	12.3333	11.6667	19.8333	18.8333	24.8333	4.66667	4.66667	4.66667	2.5	0.833333
1.33333	Resilient	0	0	0.5	0	0.5	0.5		0.5	0.5	0	1.16667	1.33333	0.333333	1.16667	0.833333	1	1.16667	0.833333	0.666667	0.833333	0.5	0.5	0	0.166667
50	Resilient	0.5	0.5	0	0	0	0.5		1.5	1	0	1.16667	1.5	0.833333	5	9.16667	10	11.5	10.6667	9.5	11.1667	10	10	7.33333	7.66667
0.666667	Resilient	0	0	1	0	0	0		2.5	2.5	4	2.16667	2.5	4.66667	5.16667	6.5	4	1.16667	0.5	0.833333	0.666667	0.333333	0.333333	0	0
33.3333	Resilient	0	0	0	0	0	0.5		0	1	1	6	5.33333	8	5	16.3333	16.8333	14	12.6667	11.6667	21.3333	0.666667	0.666667	7.5	8.5
107	Vulnerable	0.5	11.5	9.5	2.5	1.5	3.5		11	14.5	12	11.5	10.6667	12	14.5	16.6667	17.1667	17	16.5	19	18.5	17.6667	17.6667	18.6667	17.1667
45	Resilient	1	0.5	0.5	0	0.5	0.5		1.5	2.5	2.5	2.66667	6	8.66667	4.83333	5.66667	7.33333	6.5	7	5.66667	6.16667	3.16667	3.16667	6.66667	12.6667
17.3333	Resilient	0	1.5	1.5	1.5	3	3		7.5	7.5	8.5	6.66667	12.1667	13.3333	15.3333	13	9.5	15.1667	7.33333	14.8333	12	0.5	0.5	8	0.166667
18	Resilient	0.5	0	1.5	0.5	1	2.5		6	5	3.5	2.33333	3.33333	3.5	3.33333	1.33333	2.5	1.5	2.5	3.83333	3	1.5	1.5	3.83333	3.66667
2	Resilient	0.5	0	0	2	3	3.5		4	4.5	30	2	7.66667	0.5	1.83333	1.66667	1.16667	0.666667	0.333333	0.833333	0.666667	0.666667	0.666667	0	0.333333
1	Resilient	0.5	0	1	1	0	0		0.5	1	1	1	3.66667	0.666667	0.666667	0.5	0.333333	0	0	0.166667	0.333333	0.333333	0.333333	0	0.166667
26	Resilient	0.5	0	0	1	0	0.5		0.5	1.5	0	0.333333	0.333333	0.833333	4.5	6.16667	5.33333	4.83333	5.16667	4.83333	4.66667	4.5	4.5	3.83333	4.66667
72	Vulnerable	0.5	0.5	0	1.5	1	40		33	7.5	7.5	6.83333	13.6667	16	36.6667	12	15.3333	15	14.3333	14.8333	15.6667	6	6	15.1667	14.8333
95.6667	Vulnerable	0	0	1.5	0	0	0		3	1.5	0	1.83333	0.5	0.666667	9.83333	8.33333	9.16667	12.6667	12.5	12.8333	13.6667	13.8333	13.8333	16.8333	17.1667
86	Vulnerable	0	0	1	1	1.5	3		4	13.5	6.5	4.83333	9.66667	11.6667	12.6667	15.5	17.6667	15.5	16.5	14.6667	13.3333	13.6667	13.6667	14.6667	14.6667
15	Resilient	2.5	1	3	3	5	6.5		10	6.5	7	5.5	9	10.5	12.3333	13.8333	15.5	14.1667	3.16667	14.5	12.8333	6.66667	6.66667	0.166667	0.666667
90.3333	Vulnerable	5	1.5	3	2.5	6.5	5.5		42	58	37	29.3333	23.3333	22.1667	20.1667	30	32.1667	32.3333	30.3333	1.33333	32	1.16667	1.16667	43.6667	0.333333
84.3333	Vulnerable	0.5	4.5	0.5	3.5	3.5	5.5		7.5	6.5	3	5.66667	8.66667	11.5	12.5	14	15	15.5	15.5	14	12.8333	13.8333	13.8333	14.1667	14.1667
68.3333	Vulnerable	0	0	0.5	0	0	0		0.5	0.5	0	1.5	0	0	0	12.1667	12.1667	12	11.8333	9.66667	12	10.6667	10.6667	12.8333	10.6667
52	Vulnerable	0.5	1	2	0.5	0	1		1.5	2	1.5	2.66667	1.16667	1.16667	1.16667	4	5.66667	7	6.16667	2.5	11.6667	1.66667	1.66667	11.8333	12.5
1	Resilient	0.5	0.5	1.5	0.5	0	1		1	0	0.5	0.333333	0.166667	0.5	0	0.166667	0.833333	0.5	0.5	0.833333	0.333333	0	0	0.166667	0.333333
122.667	Vulnerable	1	2.5	10	16	14.5	18	22.5	24.5	21.5	23	23.6667	16.1667	18.6667	16.8333	5.5	17.1667	17	19.1667	18.3333	17.8333	20.1667	21	21.1667	19.1667
134.333	Vulnerable	0	0	0	15	9	1.5	10.5	7	16	22	24	20.8333	21.3333	21	20.6667	19	19.3333	20.3333	21.6667	22.6667	24.3333	21.6667	22.5	23
129.333	Vulnerable	0	1.5	0	0.5	0	1	13.5	14	18.5	19.5	19.6667	15.6667	16.1667	15.1667	22.3333	25.6667	24.5	18.6667	21.6667	24.8333	21.8333	21	21.8333	21.8333
55.6667	Vulnerable	1	0.5	3.5	30	8	5.5	5	15	27	38	35.1667	35.1667	23.8333	11.5	15.6667	16.8333	30.6667	16.3333	20.6667	56.1667	36.1667	15.5	6.33333	6
154	Vulnerable	0	0	0	0.5	0	2.5	0.5	0.5	0	0	5.5	18.3333	17.5	16	16.1667	24.1667	17.3333	11.5	6	19.6667	21.8333	24	24.5	28.5
129.333	Vulnerable	34	20	26.5	28.5	26.5	28	27	29	30.5	31	20.6667	19.8333	20	17.5	18.1667	23.3333	21.8333	21.8333	21.5	19.5	22	22	20.5	22.1667
106.667	Vulnerable	3.5	27	21	24	20.5	20	23.5	20.5	22.5	22	20	19	19.1667	20.8333	20.3333	15.6667	17.3333	16.3333	18.6667	19.8333	16	18.6667	16.6667	18
111.333	Vulnerable	1	1	6.5	33.5	19	24.5	30.5	29.5	27	27.5	24.8333	18.1667	17	18.1667	18.5	18.8333	16.1667	17.6667	18.3333	17.5	17.5	18.6667	19.6667	17.3333
154	Vulnerable	0	1.5	2	6	10	6	12	12.5	16	14	11	7.33333	13.6667	10.3333	9.16667	10.6667	12.6667	12.8333	12.5	12.6667	22.5	28.3333	24.8333	23.8333
143.333	Vulnerable	1.5	0	0	0.5	0.5	1	2	0.5	3	6.5	11.5	15.6667	18.3333	15.8333	19.8333	22	20.1667	19	17.3333	25.1667	26.5	25	19.5	27.1667
91	Vulnerable	1.5	51.5	14.5	25.5	18.5	23	23.5	29	28.5	30	25	22.5	20.5	21	3	19	15.3333	16.1667	15.6667	16.8333	18.8333	18.5	6.5	20.5
149.333	Vulnerable	0	1	4	4.5	22	23	10	0	19.5	21.5	22.3333	9.83333	18.1667	19	19.8333	22.1667	13.6667	21.1667	14.1667	18.6667	24.5	25.3333	27.5	21.8333
57.6667	Vulnerable	0	0	0.5	0	0.5	0	0	0	0.5	0	0	0	0	0	0	0	0.166667	0	0.166667	0	0	0.833333	19.6667	8.33333
79	Vulnerable	0.5	0.5	4	0.5	6	8	6	2.5	1	3	8.83333	14.1667	11.6667	3.5	4.66667	15.6667	16.1667	14.5	15.6667	3.5	15.3333	17.6667	10	11.8333
80	Vulnerable	0	15.5	16	10.5	12	12	14.5	14.5	17	16.5	14.1667	11	11.3333	9.5	9.5	10.1667	9	8.33333	9	9.83333	9.83333	9.83333	21	9.16667
143.667	Vulnerable	1.5	1.5	1	4	1.5	0.5	0.5	9.5	2	3.5	11.5	13.8333	21.3333	19.3333	19.8333	20.8333	19.8333	21.1667	21.6667	30.5	9	21.8333	23.6667	26.3333
88.3333	Vulnerable	0.5	52.5	0.5	0.5	52.5	3	3	1	1	5.5	11	14.8333	15.8333	18.5	18.5	19	15.1667	15.5	15.3333	13.8333	15.1667	14.3333	15.5	14.3333
69.6667	Vulnerable	1.5	5	17.5	12.5	5	3	4	4.5	17	12.5	33.3333	5.83333	3.83333	17.1667	10	17.3333	15.5	15.1667	13.8333	12.5	11.1667	10.8333	12.5	11.5
68.6667	Vulnerable	0.5	0	0.5	0	0	0	2	12	3.5	10.5	5.5	0.666667	1.83333	4	0	6	3.83333	3.83333	2.66667	5.66667	33.8333	7.33333	16.6667	10.3333
110.667	Vulnerable	0.5	0.5	0.5	0.5	0	0	1	1.5	0.5	3	5.5	7.66667	5	9.33333	13.6667	16.8333	17.5	19.1667	17.1667	17.8333	18	16.5	20.1667	18.6667
94.3333	Vulnerable	0.5	0	0	0	0	0	1	1	0.5	1.5	14	16.5	12	18.1667	18.1667	14.6667	14	13.6667	14.6667	15.5	13.8333	14.8333	16	16.3333
120.333	Vulnerable	0.5	3	2.5	3.5	3	5.5	3.5	4	0	3	14	10.6667	15.8333	14.6667	17.3333	18.5	16.5	17.5	20.1667	20.3333	17.6667	16.5	23.6667	20
1.33333	Resilient	39	54	30	12	5	1.5	14	8.5	0	9	15.3333	14.8333	14	8.33333	9.5	10.3333	5.16667	0	0	0.333333	0	0	0.166667	0.5
120	Vulnerable	0.5	0.5	1.5	16.5	12.5	9	14	14	12	12	11.6667	10.6667	12.8333	12.5	13.1667	13.5	15.3333	17.8333	12.6667	11.5	19	19.5	20.3333	20.1667
120.667	Vulnerable	0.5	0.5	2	2.5	7.5	3.5	7	10	6	19	16.5	16.8333	19	22.1667	23.8333	18.1667	19.5	17.1667	18	19.6667	20.1667	19.5	20.1667	20.6667
81.3333	Vulnerable	0	0	0	0.5	0	1	0	0.5	0.5	1	0.833333	3.83333	8.5	5.66667	10.6667	13.3333	11.5	12.8333	14.6667	14	13.6667	9.33333	16.8333	14.5
96.3333	Vulnerable	4.5	4	0.5	0.5	2	9	13.5	13	12.5	11	15	11.8333	13.6667	12.8333	15.1667	16.5	15.5	15.6667	16	16.6667	16.1667	16.6667	14.6667	16.8333
86.6667	Vulnerable	0.5	1	2.5	2.5	12.5	16	12	12	10	18.5	17.3333	16.6667	15	14.5	14	14.1667	13.3333	13.6667	14.8333	14.1667	15.3333	14.6667	14.6667	14
138	Vulnerable	2.5	4	4.5	2	13	11	14	13	14	16	19.6667	18.1667	17.6667	18.3333	20.5	24.8333	22.3333	22	23.8333	23.8333	26.6667	21.6667	24.5	22.8333
61.3333	Vulnerable	0	0	1	0	7.5	0	5	3	1	1.5	7.33333	6	5	5.33333	6	8	6.66667	6.5	7	7	9	8.83333	9.83333	12
84	Vulnerable	0	0	0	2	2	11.5	11	4.5	0.5	2	17.5	19	15.5	19	17.5	16.3333	16.3333	14.5	14.1667	15.8333	17.8333	14.1667	13.3333	14.5
99.3333	Vulnerable	1	2.5	4.5	4.5	4.5	5	8	7.5	3	7	9.83333	10.8333	13.6667	14	15.3333	16.3333	15.5	16	18	18.5	20.3333	15.6667	16.6667	17.3333
96.3333	Vulnerable	6	2.5	7	7	7.5	7	8	7	5.5	9.5	6.66667	6.83333	10	7.16667	6.16667	6.5	8.83333	10.8333	10.6667	15.3333	16.5	14.6667	16.5	17
83.6667	Vulnerable	0	0.5	1	0	1	0	0	3	1.5	3.5	6.16667	4.5	1.5	1.16667	1.5	3.83333	5.16667	4.66667	4.66667	8.83333	9	11.1667	14.8333	15.8333
122	Vulnerable	0.5	1.5	3.5	0.5	5	14.5	12.5	13.5	14	12	12.1667	9.33333	13.3333	16.8333	17.5	15.6667	15.6667	17	17.5	19.5	18.5	20.3333	20.1667	20.5
97	Vulnerable	1	0.5	0	0.5	2	0.5	1	0.5	0	0.5	5.33333	3.5	8	12.1667	5.83333	14.8333	13.8333	17.5	16.5	16.6667	17.1667	12.5	17.8333	18.1667
137.667	Vulnerable	9	10.5	9	3.5	6.5	4.5	16	10.5	11.5	24	20.5	22.5	21.1667	21.6667	20.6667	23.3333	25	22.1667	21.6667	26.1667	23.1667	23.3333	23.5	22
97.6667	Vulnerable	4.5	1.5	0.5	0.5	1.5	3	8.5	1.5	2.5	4	12.1667	7.33333	9.16667	7.83333	7.33333	7.66667	6.66667	8	8.16667	9.16667	14.6667	15.5	17	16.3333
89.6667	Vulnerable	0.5	6	14.5	16.5	19	22	21.5	18	19	21.5	18.6667	16.3333	16.6667	16.8333	21.3333	18.8333	17.3333	17.5	17	15	13.6667	14	15	15.8333
118	Vulnerable	0.5	0	0	0	2	0	0.5	0	2	11	0.333333	5.66667	13.6667	14.1667	13.6667	8.5	7.66667	6.83333	17.1667	15.1667	14.6667	17.3333	19.8333	21.8333
121.333	Vulnerable	1	0.5	0.5	2	9	10.5	1.5	11.5	1.5	22	16.3333	11.6667	15.6667	19.5	18.3333	18.3333	13.5	11.1667	21.3333	17.5	21.8333	23.5	16.5	20.6667
84.3333	Vulnerable	1.5	2	2.5	2	7.5	6.5	6.5	2.5	8	9	1	3.16667	13.5	13.5	16	13.1667	14.8333	13.6667	8.33333	13.6667	14.6667	13.8333	14	14.3333
105.667	Vulnerable	0	1	4	4.5	10.5	9	9	6.5	5	35	15.6667	9.33333	25.3333	42.5	29.6667	7	21.5	15.1667	21.1667	17.6667	16.3333	17	17.5	18.3333
0	Resilient	0.5	1.5	1	1	0.5	1	0.5	1	0	0	0.5	0	0	0.166667	0	0	0	0	0	0.166667	0.333333	0	0	0
70.6667	Vulnerable	0	0	0	0	0	0	0	0	0	0.5	0.666667	0.166667	0.333333	0.166667	1	1	7.16667	10.5	12.5	13.6667	15.6667	10.8333	9.66667	14.8333
132.333	Vulnerable	3	1	7	23	16.5	23.5	20.5	21.5	17	17.5	19.1667	21.1667	21.6667	18.5	18.6667	18.1667	19.5	18.5	21.3333	20	19.3333	21	22	23.1667
116.667	Vulnerable	0	0	0	7.5	15	7.5	5.5	6	6.5	5	3.16667	10.6667	15.5	17	16.3333	13.1667	13.5	12.8333	15	14	40.3333	22	2.5	33.8333
112	Vulnerable	10	3	0.5	7.5	16.5	26	25.5	23.5	21	21	23.3333	22.8333	23.1667	23.1667	19.8333	21.8333	23.3333	18.3333	21.6667	16.8333	16.5	17.6667	19	19.3333
134	Vulnerable	0	0.5	0	1.5	1	0	0.5	0	1	3.5	8.66667	15	17.8333	18.6667	19.5	20.1667	20.3333	21.5	22.5	22.8333	20.6667	21.5	22.5	23
82.6667	Vulnerable	0.5	0.5	0	1	0.5	0.5	0	1	0	3.5	3	3.83333	4.16667	7	14.5	15.5	14.6667	14.5	24	20.1667	12	15.8333	9.83333	15.6667
74	Vulnerable	0.5	7	3.5	9.5	16.5	11.5	12.5	13	13.5	13	14.1667	13.3333	14.5	14.1667	12.5	13.5	11.6667	11.3333	12.5	11	11.8333	12	12.5	12.5
119.667	Vulnerable	2	0	1.5	8	13.5	17.5	16	18.5	18.5	75.5	17.1667	19	22	20.1667	18.6667	18.6667	17.5	18.8333	20.8333	21.1667	19.1667	18.1667	18.5	23.1667
49.3333	Resilient	0.5	0	0.5	0	0.5	0	0	0	2	0	2	2.16667	3.83333	7.5	10.8333	14	7	14.1667	9.16667	16.1667	7.83333	7.33333	5.83333	11.5
116.667	Vulnerable	2.5	22	15	16	18.5	17	18.5	20.5	12.5	12.5	11.3333	13	15.3333	17.8333	17.3333	18.5	16.3333	16.6667	16.5	18.1667	19.1667	18.8333	19.3333	20.1667
72.6667	Vulnerable	0.5	0.5	1	3.5	2	3.5	2.5	3.5	1	3.5	3.16667	2.66667	2.83333	3.66667	2.83333	1.5	1	1.5	15	14.5	9.66667	10.3333	8.66667	17.3333
110.667	Vulnerable	0.5	0	0.5	0	2	3.5	2.5	0.5	2	2.5	0.333333	0	0.333333	2.33333	8.5	8	17.6667	17.3333	17.1667	19.3333	19.6667	17.1667	19.6667	18.5
79.3333	Vulnerable	0.5	5.5	3.5	0.5	9	10	8.5	6	5.5	6	16	10.5	11.6667	17.8333	14.3333	17	15.3333	14.5	13	10.6667	10.3333	11.3333	12.3333	16
131.667	Vulnerable	1.5	4	5.5	4.5	10.5	8	9.5	8	17.5	16.5	14.1667	13.5	17	18.8333	16.5	16	20.3333	17.1667	16.8333	17.1667	18.3333	20.1667	23.5	22.1667
17.3333	Resilient	1	1.5	0.5	2.5	3	2.5	4	3	2	4	2.5	1.33333	2.83333	4	2.66667	2	1	2	4.66667	3.83333	11.5	2.16667	5	1.5
114.333	Vulnerable	12	11	13	15.5	19	19	23	22	7	16.5	14.8333	14.8333	17.1667	19.3333	17.3333	16.8333	16.6667	15.5	18	17.5	18	18.3333	19	19.8333
8.66667	Resilient	0	0	0.5	2	2.5	0	0	0	1.5	23	3.33333	4	14.3333	12	5.66667	12.5	1.5	2.66667	4.83333	6.33333	2.16667	1.66667	0.5	2.16667
109	Vulnerable	0.5	0	0	1	5.5	13.5	9	9.5	7	11.5	10.1667	14.3333	16.6667	19.8333	16.8333	19	20.1667	19.3333	11.3333	19.1667	17.3333	18.3333	18.8333	17.3333
71.6667	Vulnerable	0	0	1	0	5	5.5	14	2.5	3.5	15.5	4.16667	8.5	12	15.1667	14.3333	13.1667	12.5	11.3333	16.1667	11.5	11.5	10.8333	11.3333	13.6667
7.66667	Resilient	1	1.5	2	6	4.5	3	2	1	1.5	2.5	3.66667	1.83333	1.66667	1.83333	2.16667	0.833333	0.666667	0.666667	1.16667	0.666667	0.666667	0.5	0.833333	2.5
116	Vulnerable	0	0	0.5	8.5	14.5	12.5	13	15.5	20.5	18	12.1667	15.5	17.1667	16.3333	17.8333	17.8333	17.8333	17.8333	18.1667	19	19.5	19.6667	19.5	18.8333
145.667	Vulnerable	1.5	1	0.5	1	1	2	2	8.5	6	9	9.83333	13.3333	17.3333	18.3333	22.8333	21.6667	25.8333	22	26.3333	24.1667	24.1667	23.3333	25.1667	24.3333
98.6667	Vulnerable	0	0	0	0	1	2	0	1	5.5	0.5	3.33333	4.16667	6.16667	13.3333	13.1667	12.6667	15.3333	14.5	15	15.6667	16.5	15.6667	16.5	17.1667
21.6667	Resilient	0	0	0	0	1	0	0	0	0	0	1.66667	0.5	0.333333	4.5	3.66667	4.66667	0.166667	0.333333	2.33333	9.83333	0.166667	2.5	0	8.33333
12	Resilient	0.5	0.5	1	6	3	3.5	4	2	3.5	1.5	4.83333	4	1.66667	2.83333	1.66667	2	1.5	1.5	2.33333	2.16667	2.5	1.5	1.83333	2.66667
116.333	Vulnerable	0	0	0	1.5	0.5	0.5	0	0	0	1.5	1	0.166667	0.833333	1.16667	1.5	0.833333	0.5	0.666667	1.5	14	0.833333	1.66667	15.1667	41.3333
117.667	Vulnerable	0.5	0.5	1	3.5	2.5	13	9.5	10.5	8	12	13.6667	9.16667	8	9.33333	11.8333	12.6667	17.1667	17.5	17.8333	18.1667	18.8333	20.1667	18.6667	20
130.667	Vulnerable	1	0	0	0	0	5	15	14	14.5	18	17.3333	17.1667	17.8333	16.1667	16.1667	17.1667	17.6667	19.8333	20.5	19.8333	21.6667	23.6667	22.5	19.1667
101	Vulnerable	1.5	1.5	3	9.5	10.5	13	10.5	10	11.5	13	13.8333	15.8333	15.8333	18.3333	19.5	21.8333	23.5	18.8333	20.1667	15	16.3333	19.3333	11.1667	20
125	Vulnerable	5	1	2.5	1.5	16.5	3.5	15.5	18	12	20	23.3333	20.6667	23.1667	17.6667	19.5	19.6667	20.8333	20.6667	19.6667	23.3333	22.8333	21.6667	21.6667	19.1667
133.333	Vulnerable	0	0	0	0	0	0.5	34.5	20.5	16.5	25	20.3333	12.5	18.5	19.3333	20	18.5	19.6667	19.6667	24.8333	22.1667	23.6667	20.8333	22.6667	23.1667
87.6667	Vulnerable	0	1	1	3.5	15	9.5	12.5	13	14.5	18.5	17.6667	16.3333	14.5	12.6667	13.5	11.3333	13.1667	12.3333	12.8333	12.5	14.3333	14.1667	14.1667	15.5
84	Vulnerable	0	0	0	0.5	0	0	0	0.5	6	1.5	4.16667	2.16667	3.16667	5.33333	5.66667	4.5	5	8	10.3333	12.8333	15.1667	14.5	13.5	14
63.3333	Vulnerable	4.5	9	6	6.5	7	10	9	8.5	10.5	10.5	10.1667	6	5	8	8.33333	6.66667	8	9.33333	8	5.83333	11.5	12.8333	12.1667	6.66667
114	Vulnerable	0.5	0.5	1.5	13.5	13	10	6	6	7.5	11	13.8333	18.6667	15	13.3333	14.3333	15.5	18.3333	19.3333	19.8333	17.1667	17.6667	18.1667	19.5	19.3333
102.667	Vulnerable	0	0	0.5	2	8.5	4.5	5	5.5	9	6.5	6.83333	4.66667	8.16667	11.5	13	15.6667	18.8333	16.1667	17.3333	17	16.1667	16.5	17	17.8333
98.3333	Vulnerable	2	1.5	0.5	0.5	6	3	4.5	5.5	5	7	6.83333	4.5	7.5	8.16667	3.33333	9.66667	13.6667	6.66667	18.3333	17.8333	16	14.6667	15	19.5
35.6667	Resilient	0	1	1	1	2	5	9.5	6.5	5.5	9.5	12	7.16667	11.3333	14.3333	15.6667	2.16667	3	16.8333	8.5	8	0.5	2.16667	0	15.6667
84	Vulnerable	0.5	0	0	1	5.5	9	5.5	10	8.5	11.5	13.1667	9.5	8.66667	10.1667	9.5	9.83333	10	8.66667	5.16667	16	17.1667	12.8333	14	15.1667
87.3333	Vulnerable	0	0	0	0.5	0.5	0	2	4	2	15.5	12	11.3333	12.5	15.5	15.5	16.5	17.5	16	50.3333	16.8333	15.3333	13.6667	15.3333	14.6667
44	Resilient	0.5	1	0.5	1	1	0.5	12	10	14	14	12	8	6.66667	12.3333	13.3333	15.5	9.16667	10.1667	15.3333	10.3333	14	6	6.16667	9.83333
46.6667	Resilient	0.5	0	0	0.5	1.5	1.5	0.5	1	0	0	0.666667	0.5	0.666667	0.833333	1.66667	3	2.5	2.33333	3.16667	6	6.16667	5.5	6.83333	11
87.6667	Vulnerable	0.5	1.5	1.5	1	3	0.5	1	0	1	0.5	4.16667	1	0.333333	0.666667	0.5	0.5	0.333333	0.833333	1.66667	3.16667	10.3333	13.5	14.1667	16.1667
23.6667	Resilient	0	0.5	0	0	0	11.5	6	7	7	9	8	6.5	6.16667	4.83333	3.66667	4.5	5.16667	3.66667	5.5	4.33333	5	4	4.16667	3.66667
106	Vulnerable	3	4	2	3	7.5	6.5	8	9	11	14	11.8333	15.1667	14.6667	14.1667	14.1667	15.8333	15.1667	17.8333	20.8333	19.3333	18.6667	18.3333	16.8333	17.8333
121.333	Vulnerable	0	0	0	0.5	1.5	0.5	1.5	0	0.5	2.5	0.833333	2.33333	14.6667	14.8333	13	13.8333	11.6667	11.8333	17.1667	19	17.5	21	20.6667	19
99.3333	Vulnerable	1	0	0.5	0.5	2	3	1.5	3.5	4.5	15	20.6667	18.3333	18.1667	16.5	16.1667	16.5	18.6667	18.8333	18.8333	16.3333	15.8333	14.5	18.5	16.6667

## Sheet: Panel B
split	lga_last_three_days
Vulnerable	143
Vulnerable	148.667
Resilient	37
Vulnerable	133.333
Vulnerable	81
Vulnerable	152.333
Vulnerable	79.5
Resilient	0
Vulnerable	151.333
Vulnerable	188
Vulnerable	119
Vulnerable	111
Vulnerable	115
Vulnerable	159.333
Vulnerable	117.333
Vulnerable	171.667
Vulnerable	102
Vulnerable	152
Vulnerable	117.667
Vulnerable	163
Vulnerable	135
Resilient	6.33333
Resilient	38.6667
Vulnerable	116.667
Vulnerable	110.333
Resilient	1.66667
Vulnerable	92.3333
Resilient	0
Vulnerable	110.667
Vulnerable	149
Vulnerable	124
Resilient	45
Resilient	9.33333
Vulnerable	114.333
Resilient	4
Resilient	18.3333
Resilient	4
Vulnerable	121
Vulnerable	143.667
Vulnerable	118
Vulnerable	143.5
Vulnerable	166.667
Resilient	20.6667
Vulnerable	114
Vulnerable	77.6667
Vulnerable	125.667
Vulnerable	104
Vulnerable	77.3333
Vulnerable	140.333
Vulnerable	143.333
Vulnerable	112.333
Vulnerable	110.333
Vulnerable	141.667
Vulnerable	164.333
Vulnerable	128.667
Vulnerable	95.6667
Vulnerable	110.333
Vulnerable	97
Vulnerable	147
Vulnerable	124
Vulnerable	169
Vulnerable	120.667
Vulnerable	157.333
Vulnerable	189
Vulnerable	85.6667
Resilient	25.5
Vulnerable	129
Vulnerable	136.333
Vulnerable	92
Vulnerable	82
Vulnerable	104
Vulnerable	106.333
Vulnerable	102.667
Vulnerable	98.3333
Vulnerable	157.667
Vulnerable	79.6667
Vulnerable	82
Vulnerable	138.667
Vulnerable	157
Vulnerable	154
Vulnerable	149.333
Vulnerable	172.5
Vulnerable	137
Vulnerable	137
Vulnerable	127
Vulnerable	91.6667
Resilient	0
Vulnerable	93.3333
Vulnerable	116.5
Vulnerable	111.667
Vulnerable	145.667
Vulnerable	147
Vulnerable	100.333
Resilient	42.3333
Vulnerable	76
Vulnerable	130.667
Vulnerable	99
Vulnerable	128.667
Vulnerable	155
Vulnerable	107
Resilient	0.666667
Vulnerable	125.667
Vulnerable	117.667
Vulnerable	51.3333
Vulnerable	150.667
Vulnerable	140.667
Vulnerable	147.333
Vulnerable	114.667
Vulnerable	161.667
Resilient	24.3333
Vulnerable	130.333
Vulnerable	104.333
Vulnerable	111.667
Vulnerable	83.3333
Vulnerable	85
Vulnerable	80.5
Vulnerable	149.667
Vulnerable	64
Vulnerable	109.667
Vulnerable	122.667
Vulnerable	58
Vulnerable	107.667
Vulnerable	108.5
Vulnerable	102
Vulnerable	112
Vulnerable	155
Resilient	11.6667
Resilient	31.3333
Resilient	0.333333
Resilient	1.66667
Vulnerable	134.667
Vulnerable	128
Vulnerable	128
Resilient	0
Vulnerable	134
Vulnerable	144.667
Vulnerable	144.667
Resilient	9.33333
Vulnerable	143.333
Vulnerable	126
Vulnerable	78.3333
Vulnerable	128.333
Vulnerable	133.333
Vulnerable	84.6667
Vulnerable	74
Vulnerable	126.667
Vulnerable	171.667
Vulnerable	131
Resilient	24.3333
Vulnerable	119.333
Resilient	0.333333
Vulnerable	134.667
Vulnerable	89.6667
Vulnerable	129.333
Vulnerable	126.667
Resilient	1.33333
Resilient	9.66667
Vulnerable	147.667
Resilient	0.333333
Vulnerable	64.6667
Vulnerable	120.667
Vulnerable	154.333
Vulnerable	102.333
Resilient	0
Vulnerable	145
Vulnerable	130.667
Resilient	0.333333
Vulnerable	144.667
Vulnerable	98
Vulnerable	70.6667
Vulnerable	138.667
Resilient	10.3333
Vulnerable	155.667
Resilient	11.6667
Vulnerable	109.667
Vulnerable	113.333
Vulnerable	93
Resilient	42.3333
Resilient	7
Vulnerable	88.3333
Resilient	36.1667
Vulnerable	109
Vulnerable	71.3333
Vulnerable	143
Vulnerable	118
Vulnerable	95
Vulnerable	108.5
Resilient	44
Vulnerable	71
Vulnerable	114.333
Vulnerable	131.667
Vulnerable	139
Vulnerable	154
Vulnerable	135.333
Resilient	11
Resilient	2
Resilient	2.33333
Vulnerable	64
Vulnerable	60
Resilient	27.6667
Vulnerable	95.6667
Resilient	3.66667
Vulnerable	99.3333
Resilient	2
Vulnerable	87.6667
Vulnerable	110.333
Resilient	0.666667
Vulnerable	85.3333
Resilient	0.666667
Resilient	2.66667
Resilient	0.666667
Resilient	14.3333
Vulnerable	109.333
Vulnerable	138.333
Resilient	49
Vulnerable	70.3333
Resilient	6
Vulnerable	120.333
Vulnerable	87.6667
Vulnerable	134.333
Vulnerable	192.333
Resilient	0.333333
Vulnerable	83
Vulnerable	147.333
Vulnerable	127
Vulnerable	119
Vulnerable	141
Vulnerable	132.667
Resilient	0.666667
Vulnerable	83.6667
Vulnerable	111.333
Vulnerable	148.333
Vulnerable	136.333
Vulnerable	79
Vulnerable	74.6667
Vulnerable	103
Vulnerable	81.3333
Vulnerable	117.333
Vulnerable	135
Vulnerable	57.3333
Vulnerable	134.333
Vulnerable	85.6667
Vulnerable	97.6667
Vulnerable	73
Vulnerable	98.3333
Vulnerable	86
Vulnerable	88
Vulnerable	104.333
Resilient	3.66667
Vulnerable	75.6667
Vulnerable	87.6667
Vulnerable	106.333
Resilient	29.3333
Vulnerable	111.667
Vulnerable	117
Vulnerable	86.3333
Vulnerable	61.6667
Vulnerable	72.6667
Vulnerable	94.3333
Vulnerable	117
Vulnerable	105.333
Vulnerable	107.667
Resilient	0
Vulnerable	68.3333
Vulnerable	86.6667
Vulnerable	113.333
Vulnerable	119
Resilient	21
Vulnerable	103.667
Vulnerable	103.333
Vulnerable	92.6667
Vulnerable	87.3333
Resilient	13
Vulnerable	118.667
Vulnerable	117.667
Resilient	4.33333
Vulnerable	123.333
Vulnerable	153
Vulnerable	192
Vulnerable	70
Vulnerable	95.3333
Resilient	40.3333
Vulnerable	148
Resilient	10
Vulnerable	110.333
Vulnerable	182
Resilient	27
Vulnerable	75
Vulnerable	122.333
Vulnerable	109.333
Vulnerable	137.667
Vulnerable	172
Vulnerable	60.6667
Vulnerable	121
Vulnerable	103.667
Vulnerable	119.667
Vulnerable	116.667
Vulnerable	133.667
Vulnerable	112
Vulnerable	116
Vulnerable	72.3333
Vulnerable	53
Resilient	6.33333
Resilient	10
Resilient	2.66667
Vulnerable	101.333
Vulnerable	115.667
Resilient	2.66667
Vulnerable	87.3333
Vulnerable	88.6667
Vulnerable	93.6667
Vulnerable	61.3333
Vulnerable	72.3333
Vulnerable	58.6667
Resilient	3.66667
Resilient	8.66667
Vulnerable	124.333
Resilient	46.3333
Vulnerable	133.667
Vulnerable	114
Vulnerable	75
Resilient	31
Vulnerable	67.6667
Vulnerable	66.3333
Vulnerable	96.3333
Vulnerable	101.333
Vulnerable	89.6667
Vulnerable	62.6667
Vulnerable	72.6667
Vulnerable	175
Vulnerable	135.333
Vulnerable	143
Vulnerable	85.3333
Resilient	47.6667
Vulnerable	129.333
Vulnerable	149
Resilient	40.3333
Vulnerable	133.667
Vulnerable	134.667
Vulnerable	114.333
Resilient	44.6667
Vulnerable	105.333
Resilient	1.33333
Resilient	6
Resilient	25.6667
Vulnerable	86.6667
Vulnerable	84.6667
Vulnerable	129.667
Vulnerable	108
Vulnerable	150.333
Vulnerable	169
Vulnerable	68
Vulnerable	122.667
Resilient	4.66667
Resilient	2
Vulnerable	67
Vulnerable	113.333
Vulnerable	108.333
Vulnerable	124.333
Vulnerable	108
Vulnerable	79.6667
Vulnerable	127.333
Vulnerable	126
Resilient	2
Vulnerable	95.6667
Resilient	16
Vulnerable	100.667
Resilient	24.3333
Vulnerable	67.6667
Vulnerable	97
Vulnerable	112.333
Vulnerable	86.6667
Resilient	0
Vulnerable	108
Vulnerable	86.3333
Vulnerable	97.6667
Vulnerable	96.3333
Vulnerable	116.333
Vulnerable	89
Vulnerable	132.333
Vulnerable	70.3333
Vulnerable	93.6667
Vulnerable	88
Vulnerable	97.6667
Vulnerable	98.3333
Vulnerable	123
Vulnerable	199.667
Vulnerable	115.333
Resilient	35.6667
Vulnerable	109.333
Vulnerable	145.333
Vulnerable	63
Vulnerable	94
Vulnerable	88.6667
Resilient	2.66667
Resilient	3.33333
Vulnerable	73.3333
Vulnerable	143
Vulnerable	101.333
Vulnerable	72.3333
Vulnerable	68.6667
Vulnerable	136.333
Resilient	33.6667
Resilient	4
Resilient	6.66667
Vulnerable	74
Vulnerable	98
Vulnerable	81.6667
Vulnerable	92
Resilient	38.6667
Vulnerable	72.3333
Vulnerable	102.667
Vulnerable	80.6667
Vulnerable	87.6667
Resilient	43
Vulnerable	103.667
Resilient	4
Vulnerable	100
Vulnerable	111.333
Vulnerable	100.333
Vulnerable	85
Vulnerable	112.667
Resilient	1.33333
Vulnerable	115.333
Vulnerable	96
Vulnerable	89.3333
Vulnerable	117
Resilient	1.33333
Vulnerable	109
Vulnerable	98
Vulnerable	97
Vulnerable	105.333
Vulnerable	55
Vulnerable	122
Vulnerable	89
Resilient	1
Vulnerable	86.6667
Vulnerable	125
Resilient	42
Vulnerable	107.333
Vulnerable	137.667
Vulnerable	54
Resilient	21.3333
Vulnerable	97
Vulnerable	64.3333
Vulnerable	119.667
Vulnerable	111.667
Vulnerable	136
Vulnerable	130.667
Vulnerable	133
Resilient	7.33333
Resilient	10.3333
Vulnerable	77.6667
Vulnerable	91.6667
Resilient	22.6667
Resilient	16
Resilient	1.33333
Resilient	50
Resilient	0.666667
Resilient	33.3333
Vulnerable	107
Resilient	45
Resilient	17.3333
Resilient	18
Resilient	2
Resilient	1
Resilient	26
Vulnerable	72
Vulnerable	95.6667
Vulnerable	86
Resilient	15
Vulnerable	90.3333
Vulnerable	84.3333
Vulnerable	68.3333
Vulnerable	52
Resilient	1
Vulnerable	122.667
Vulnerable	134.333
Vulnerable	129.333
Vulnerable	55.6667
Vulnerable	154
Vulnerable	129.333
Vulnerable	106.667
Vulnerable	111.333
Vulnerable	154
Vulnerable	143.333
Vulnerable	91
Vulnerable	149.333
Vulnerable	57.6667
Vulnerable	79
Vulnerable	80
Vulnerable	143.667
Vulnerable	88.3333
Vulnerable	69.6667
Vulnerable	68.6667
Vulnerable	110.667
Vulnerable	94.3333
Vulnerable	120.333
Resilient	1.33333
Vulnerable	120
Vulnerable	120.667
Vulnerable	81.3333
Vulnerable	96.3333
Vulnerable	86.6667
Vulnerable	138
Vulnerable	61.3333
Vulnerable	84
Vulnerable	99.3333
Vulnerable	96.3333
Vulnerable	83.6667
Vulnerable	122
Vulnerable	97
Vulnerable	137.667
Vulnerable	97.6667
Vulnerable	89.6667
Vulnerable	118
Vulnerable	121.333
Vulnerable	84.3333
Vulnerable	105.667
Resilient	0
Vulnerable	70.6667
Vulnerable	132.333
Vulnerable	116.667
Vulnerable	112
Vulnerable	134
Vulnerable	82.6667
Vulnerable	74
Vulnerable	119.667
Resilient	49.3333
Vulnerable	116.667
Vulnerable	72.6667
Vulnerable	110.667
Vulnerable	79.3333
Vulnerable	131.667
Resilient	17.3333
Vulnerable	114.333
Resilient	8.66667
Vulnerable	109
Vulnerable	71.6667
Resilient	7.66667
Vulnerable	116
Vulnerable	145.667
Vulnerable	98.6667
Resilient	21.6667
Resilient	12
Vulnerable	116.333
Vulnerable	117.667
Vulnerable	130.667
Vulnerable	101
Vulnerable	125
Vulnerable	133.333
Vulnerable	87.6667
Vulnerable	84
Vulnerable	63.3333
Vulnerable	114
Vulnerable	102.667
Vulnerable	98.3333
Resilient	35.6667
Vulnerable	84
Vulnerable	87.3333
Resilient	44
Resilient	46.6667
Vulnerable	87.6667
Resilient	23.6667
Vulnerable	106
Vulnerable	121.333
Vulnerable	99.3333

## Sheet: Panel C
split	pr	breakpoint	period
Vulnerable	10	32	ShA
Vulnerable	6	12	ShA
Resilient	9	25	ShA
Vulnerable	10	32	ShA
Vulnerable	1	1	ShA
Vulnerable	0	0	ShA
Vulnerable	0	0	ShA
Resilient	0	0	ShA
Vulnerable	0	0	ShA
Vulnerable	5	9	ShA
Vulnerable	11	40	ShA
Vulnerable	0	0	ShA
Vulnerable	1	1	ShA
Vulnerable	2	2	ShA
Vulnerable	2	2	ShA
Vulnerable	11	40	ShA
Vulnerable	5	9	ShA
Vulnerable	1	1	ShA
Vulnerable	4	6	ShA
Vulnerable	10	32	ShA
Vulnerable	15	95	ShA
Resilient	2	2	ShA
Resilient	2	2	ShA
Vulnerable	6	12	ShA
Vulnerable	4	6	ShA
Resilient	2	2	ShA
Vulnerable	4	6	ShA
Resilient	0	0	ShA
Vulnerable	4	6	ShA
Vulnerable	1	1	ShA
Vulnerable	0	0	ShA
Resilient	0	0	ShA
Resilient	5	9	ShA
Vulnerable	4	6	ShA
Resilient	4	6	ShA
Resilient	5	9	ShA
Resilient	0	0	ShA
Vulnerable	2	2	ShA
Vulnerable	5	9	ShA
Vulnerable	0	0	ShA
Vulnerable	0	0	ShA
Vulnerable	1	1	ShA
Resilient	0	0	ShA
Vulnerable	3	4	ShA
Vulnerable	2	2	ShA
Vulnerable	0	0	ShA
Vulnerable	5	9	ShA
Vulnerable	1	1	ShA
Vulnerable	3	4	ShA
Vulnerable	1	1	ShA
Vulnerable	6	12	ShA
Vulnerable	12	50	ShA
Vulnerable	12	50	ShA
Vulnerable	14	77	ShA
Vulnerable	8	20	ShA
Vulnerable	1	1	ShA
Vulnerable	2	2	ShA
Vulnerable	4	6	ShA
Vulnerable	10	32	ShA
Vulnerable	10	32	ShA
Vulnerable	11	40	ShA
Vulnerable	1	1	ShA
Vulnerable	10	32	ShA
Vulnerable	0	0	ShA
Vulnerable	0	0	ShA
Resilient	0	0	ShA
Vulnerable	1	1	ShA
Vulnerable	1	1	ShA
Vulnerable	1	1	ShA
Vulnerable	2	2	ShA
Vulnerable	10	32	ShA
Vulnerable	0	0	ShA
Vulnerable	2	2	ShA
Vulnerable	2	2	ShA
Vulnerable	0	0	ShA
Vulnerable	5	9	ShA
Vulnerable	0	0	ShA
Vulnerable	9	25	ShA
Vulnerable	2	2	ShA
Vulnerable	9	25	ShA
Vulnerable	6	12	ShA
Vulnerable	8	20	ShA
Vulnerable	3	4	ShA
Vulnerable	6	12	ShA
Vulnerable	1	1	ShA
Vulnerable	3	4	ShA
Resilient	0	0	ShA
Vulnerable	5	9	ShA
Vulnerable	7	15	ShA
Vulnerable	0	0	ShA
Vulnerable	9	25	ShA
Vulnerable	6	12	ShA
Vulnerable	6	12	ShA
Resilient	15	95	ShA
Vulnerable	7	15	ShA
Vulnerable	10	32	ShA
Vulnerable	11	40	ShA
Vulnerable	1	1	ShA
Vulnerable	2	2	ShA
Vulnerable	10	32	ShA
Resilient	0	0	ShA
Vulnerable	7	15	ShA
Vulnerable	0	0	ShA
Vulnerable	2	2	ShA
Vulnerable	10	32	ShA
Vulnerable	8	20	ShA
Vulnerable	9	25	ShA
Vulnerable	0	0	ShA
Vulnerable	0	0	ShA
Resilient	3	4	ShA
Vulnerable	0	0	ShA
Vulnerable	6	12	ShA
Vulnerable	6	12	ShA
Vulnerable	4	6	ShA
Vulnerable	0	0	ShA
Vulnerable	2	2	ShA
Vulnerable	10	32	ShA
Vulnerable	1	1	ShA
Vulnerable	2	2	ShA
Vulnerable	4	6	ShA
Vulnerable	1	1	ShA
Vulnerable	9	25	ShA
Vulnerable	10	32	ShA
Vulnerable	1	1	ShA
Vulnerable	0	0	ShA
Vulnerable	5	9	ShA
Resilient	2	2	ShA
Resilient	1	1	ShA
Resilient	0	0	ShA
Resilient	0	0	ShA
Vulnerable	3	4	ShA
Vulnerable	4	9	ShA
Vulnerable	0	0	ShA
Resilient	0	0	ShA
Vulnerable	7	15	ShA
Vulnerable	3	4	ShA
Vulnerable	13	62	ShA
Resilient	1	1	ShA
Vulnerable	7	15	ShA
Vulnerable	6	12	ShA
Vulnerable	0	0	ShA
Vulnerable	10	32	ShA
Vulnerable	1	1	ShA
Vulnerable	0	0	ShA
Vulnerable	1	1	ShA
Vulnerable	6	12	ShA
Vulnerable	6	12	ShA
Vulnerable	6	12	ShA
Resilient	1	1	ShA
Vulnerable	3	4	ShA
Resilient	1	1	ShA
Vulnerable	3	4	ShA
Vulnerable	4	9	ShA
Vulnerable	0	0	ShA
Vulnerable	7	15	ShA
Resilient	0	0	ShA
Resilient	3	4	ShA
Vulnerable	3	4	ShA
Resilient	2	2	ShA
Vulnerable	0	0	ShA
Vulnerable	4	6	ShA
Vulnerable	9	25	ShA
Vulnerable	1	1	ShA
Resilient	0	0	ShA
Vulnerable	6	12	ShA
Vulnerable	2	2	ShA
Vulnerable	5	9	ShA
Vulnerable	1	1	ShA
Vulnerable	1	1	ShA
Vulnerable	8	20	ShA
Resilient	1	1	ShA
Vulnerable	11	40	ShA
Resilient	2	2	ShA
Vulnerable	9	25	ShA
Vulnerable	10	32	ShA
Vulnerable	14	95	ShA
Resilient	1	1	ShA
Resilient	1	1	ShA
Vulnerable	10	32	ShA
Resilient	9	25	ShA
Vulnerable	2	2	ShA
Vulnerable	0	0	ShA
Vulnerable	5	9	ShA
Vulnerable	2	2	ShA
Vulnerable	2	2	ShA
Vulnerable	0	0	ShA
Resilient	8	20	ShA
Vulnerable	1	1	ShA
Vulnerable	2	2	ShA
Vulnerable	0	0	ShA
Vulnerable	2	2	ShA
Vulnerable	1	1	ShA
Resilient	0	0	ShA
Resilient	1	1	ShA
Resilient	0	0	ShA
Vulnerable	0	0	ShA
Vulnerable	1	1	ShA
Resilient	1	1	ShA
Vulnerable	4	6	ShA
Resilient	1	1	ShA
Vulnerable	7	15	ShA
Resilient	1	1	ShA
Vulnerable	7	15	ShA
Vulnerable	12	50	ShA
Resilient	0	0	ShA
Vulnerable	0	0	ShA
Resilient	0	0	ShA
Resilient	1		ShA
Resilient	0	0	ShA
Resilient	3	4	ShA
Vulnerable	1	1	ShA
Vulnerable	2	2	ShA
Resilient	1	1	ShA
Vulnerable	2	2	ShA
Resilient	2	2	ShA
Vulnerable	4	6	ShA
Vulnerable	1	1	ShA
Vulnerable	0	0	ShA
Vulnerable	6	12	ShA
Resilient	2	2	ShA
Vulnerable	2	2	ShA
Vulnerable	11	40	ShA
Vulnerable	2	2	ShA
Vulnerable	5	9	ShA
Vulnerable	2	2	ShA
Vulnerable	2	2	ShA
Resilient	0	0	ShA
Vulnerable	15	95	ShA
Vulnerable	12	50	ShA
Vulnerable	11	40	ShA
Vulnerable	0	0	ShA
Vulnerable	1	1	ShA
Vulnerable	0	0	ShA
Vulnerable	2	2	ShA
Vulnerable	0	0	ShA
Vulnerable	12	50	ShA
Vulnerable	0	0	ShA
Vulnerable	10	32	ShA
Vulnerable	11	40	ShA
Vulnerable	3	4	ShA
Vulnerable	6	12	ShA
Vulnerable	9	25	ShA
Vulnerable	7	15	ShA
Vulnerable	1	1	ShA
Vulnerable	8	20	ShA
Vulnerable	0	0	ShA
Resilient	2	2	ShA
Vulnerable	2	2	ShA
Vulnerable	0	0	ShA
Vulnerable	0	0	ShA
Resilient	1	1	ShA
Vulnerable	14	77	ShA
Vulnerable	7	15	ShA
Vulnerable	2	2	ShA
Vulnerable	5	9	ShA
Vulnerable	3	4	ShA
Vulnerable	0	0	ShA
Vulnerable	14	77	ShA
Vulnerable	4	6	ShA
Vulnerable	1	1	ShA
Resilient	1	1	ShA
Vulnerable	3	4	ShA
Vulnerable	8	20	ShA
Vulnerable	8	20	ShA
Vulnerable	0	0	ShA
Resilient	0	0	ShA
Vulnerable	12	50	ShA
Vulnerable	5	9	ShA
Vulnerable	2	2	ShA
Vulnerable	1	1	ShA
Resilient	2	2	ShA
Vulnerable	10		ShA
Vulnerable	6		ShA
Resilient	1		ShA
Vulnerable	2		ShA
Vulnerable	9		ShA
Vulnerable	0		ShA
Vulnerable	2		ShA
Vulnerable	2		ShA
Resilient	0		ShA
Vulnerable	8		ShA
Resilient	3		ShA
Vulnerable	12		ShA
Vulnerable	4		ShA
Resilient	3		ShA
Vulnerable	0		ShA
Vulnerable	11		ShA
Vulnerable	0		ShA
Vulnerable	5		ShA
Vulnerable	6		ShA
Vulnerable	2		ShA
Vulnerable	2		ShA
Vulnerable	10		ShA
Vulnerable	12		ShA
Vulnerable	11		ShA
Vulnerable	5		ShA
Vulnerable	6		ShA
Vulnerable	15		ShA
Vulnerable	7		ShA
Vulnerable	2		ShA
Resilient	2		ShA
Resilient	2		ShA
Resilient	0		ShA
Vulnerable	0		ShA
Vulnerable	12		ShA
Resilient	0		ShA
Vulnerable	2		ShA
Vulnerable	6		ShA
Vulnerable	9		ShA
Vulnerable	1		ShA
Vulnerable	7		ShA
Vulnerable	3		ShA
Resilient	1		ShA
Resilient	2		ShA
Vulnerable	4		ShA
Resilient	5		ShA
Vulnerable	4		ShA
Vulnerable	4		ShA
Vulnerable	6		ShA
Resilient	0		ShA
Vulnerable	5		ShA
Vulnerable	1		ShA
Vulnerable	6		ShA
Vulnerable	4		ShA
Vulnerable	10		ShA
Vulnerable	2		ShA
Vulnerable	4	9	ShA
Vulnerable	8	25	ShA
Vulnerable	1	1	ShA
Vulnerable	3	4	ShA
Vulnerable	0	0	ShA
Resilient	8	25	ShA
Vulnerable	6	15	ShA
Vulnerable	7	20	ShA
Resilient	6	15	ShA
Vulnerable	3	6	ShA
Vulnerable	2	4	ShA
Vulnerable	8	25	ShA
Resilient	1	1	ShA
Vulnerable	11	50	ShA
Resilient	1	1	ShA
Resilient	4	9	ShA
Resilient	6	15	ShA
Vulnerable	11	50	ShA
Vulnerable	6	15	ShA
Vulnerable	9	32	ShA
Vulnerable	14	95	ShA
Vulnerable	12	62	ShA
Vulnerable	7	20	ShA
Vulnerable	2	2	ShA
Vulnerable	5	12	ShA
Resilient	3	6	ShA
Resilient	2	2	ShA
Vulnerable	1	1	ShA
Vulnerable	8	25	ShA
Vulnerable	14	95	ShA
Vulnerable	5	12	ShA
Vulnerable	11	50	ShA
Vulnerable	1	1	ShA
Vulnerable	3	6	ShA
Vulnerable	3	6	ShA
Resilient	1	2	ShA
Vulnerable	6	15	ShA
Resilient	15	118	ShA
Vulnerable	8	25	ShA
Resilient	9	32	ShA
Vulnerable	4	9	ShA
Vulnerable	3	6	ShA
Vulnerable	1	1	ShA
Vulnerable	15	118	ShA
Resilient	0	0	ShA
Vulnerable	6	12	ShA
Vulnerable	0	0	ShA
Vulnerable	3	6	ShA
Vulnerable	7	20	ShA
Vulnerable	7	20	ShA
Vulnerable	6	15	ShA
Vulnerable	15	118	ShA
Vulnerable	16	145	ShA
Vulnerable	14	95	ShA
Vulnerable	12	62	ShA
Vulnerable	6	15	ShA
Vulnerable	3	4	ShA
Vulnerable	4	9	ShA
Vulnerable	11	50	ShA
Vulnerable	9	32	ShA
Resilient	3	6	ShA
Vulnerable	2	4	ShA
Vulnerable	11	50	ShA
Vulnerable	15	118	ShA
Vulnerable	9	32	ShA
Vulnerable	0	0	ShA
Resilient	1	1	ShA
Resilient	2	2	ShA
Vulnerable	7	20	ShA
Vulnerable	1	2	ShA
Vulnerable	7	20	ShA
Vulnerable	4	9	ShA
Vulnerable	8	25	ShA
Vulnerable	10	40	ShA
Resilient	2	4	ShA
Resilient	2	4	ShA
Resilient	0	0	ShA
Vulnerable	3	4	ShA
Vulnerable	12	62	ShA
Vulnerable	16	145	ShA
Vulnerable	1	2	ShA
Resilient	0	0	ShA
Vulnerable	3	6	ShA
Vulnerable	13	77	ShA
Vulnerable	11	50	ShA
Vulnerable	0	0	ShA
Resilient	1	2	ShA
Vulnerable	2	4	ShA
Resilient	0	0	ShA
Vulnerable	7	20	ShA
Vulnerable	2	4	ShA
Vulnerable	11	50	ShA
Vulnerable	4	9	ShA
Vulnerable	10	40	ShA
Resilient	0	0	ShA
Vulnerable	9	32	ShA
Vulnerable	8	25	ShA
Vulnerable	4	9	ShA
Vulnerable	6	15	ShA
Resilient	0	0	ShA
Vulnerable	4	9	ShA
Vulnerable	9	32	ShA
Vulnerable	1	1	ShA
Vulnerable	0	0	ShA
Vulnerable	1	1	ShA
Vulnerable	5	9	ShA
Vulnerable	0	0	ShA
Resilient	0	0	ShA
Vulnerable	0	0	ShA
Vulnerable	4	9	ShA
Resilient	0	0	ShA
Vulnerable	6	15	ShA
Vulnerable	0	0	ShA
Resilient	2	4	ShA
Vulnerable	0	0	ShA
Vulnerable	0	0	ShA
Vulnerable	3	4	ShA
Vulnerable	12	62	ShA
Vulnerable	6	15	ShA
Vulnerable	3	6	ShA
Vulnerable	10	40	ShA
Resilient	5	12	ShA
Resilient	2	4	ShA
Vulnerable	4	9	ShA
Vulnerable	4	9	ShA
Resilient	1	1	ShA
Resilient	2	4	ShA
Resilient	0	0	ShA
Resilient	1	1	ShA
Resilient	3	4	ShA
Resilient	0	0	ShA
Vulnerable	5	12	ShA
Resilient	2	2	ShA
Resilient	5	12	ShA
Resilient	5	12	ShA
Resilient	1	1	ShA
Resilient	0	0	ShA
Resilient	1	1	ShA
Vulnerable	6	15	ShA
Vulnerable	0	0	ShA
Vulnerable	4	9	ShA
Resilient	4	9	ShA
Vulnerable	8	25	ShA
Vulnerable	3	6	ShA
Vulnerable	0	0	ShA
Vulnerable	1	1	ShA
Resilient	0	0	ShA
Vulnerable	11	50	ShA
Vulnerable	7	20	ShA
Vulnerable	11	50	ShA
Vulnerable	3	6	ShA
Vulnerable	1	1	ShA
Vulnerable	10	40	ShA
Vulnerable	11	50	ShA
Vulnerable	9	32	ShA
Vulnerable	4	9	ShA
Vulnerable	3	6	ShA
Vulnerable	10	40	ShA
Vulnerable	4	9	ShA
Vulnerable	0	0	ShA
Vulnerable	2	2	ShA
Vulnerable	14	95	ShA
Vulnerable	3	6	ShA
Vulnerable	2	2	ShA
Vulnerable	5	12	ShA
Vulnerable	2	4	ShA
Vulnerable	5	12	ShA
Vulnerable	0	0	ShA
Vulnerable	0	0	ShA
Resilient	4	9	ShA
Vulnerable	4	6	ShA
Vulnerable	7	20	ShA
Vulnerable	0	0	ShA
Vulnerable	3	6	ShA
Vulnerable	11	50	ShA
Vulnerable	7	20	ShA
Vulnerable	2	2	ShA
Vulnerable	2	2	ShA
Vulnerable	8	25	ShA
Vulnerable	6	15	ShA
Vulnerable	1	2	ShA
Vulnerable	4	9	ShA
Vulnerable	1	1	ShA
Vulnerable	8	25	ShA
Vulnerable	4	6	ShA
Vulnerable	13	77	ShA
Vulnerable	3		ShA
Vulnerable	1		ShA
Vulnerable	3		ShA
Vulnerable	6		ShA
Resilient	0		ShA
Vulnerable	1		ShA
Vulnerable	7		ShA
Vulnerable	3		ShA
Vulnerable	10		ShA
Vulnerable	2		ShA
Vulnerable	2		ShA
Vulnerable	13		ShA
Vulnerable	7		ShA
Resilient	1		ShA
Vulnerable	10		ShA
Vulnerable	2		ShA
Vulnerable	1		ShA
Vulnerable	5		ShA
Vulnerable	9		ShA
Resilient	2		ShA
Vulnerable	13		ShA
Resilient	3		ShA
Vulnerable	7		ShA
Vulnerable	2		ShA
Resilient	1		ShA
Vulnerable	10		ShA
Vulnerable	5		ShA
Vulnerable	0		ShA
Resilient	0		ShA
Resilient	2		ShA
Vulnerable	0		ShA
Vulnerable	5		ShA
Vulnerable	11		ShA
Vulnerable	9		ShA
Vulnerable	9		ShA
Vulnerable	9		ShA
Vulnerable	8		ShA
Vulnerable	3		ShA
Vulnerable	7		ShA
Vulnerable	9		ShA
Vulnerable	4		ShA
Vulnerable	3		ShA
Vulnerable	6		ShA
Vulnerable	2		ShA
Resilient	7		ShA
Resilient	0		ShA
Vulnerable	2		ShA
Resilient	10		ShA
Vulnerable	9		ShA
Vulnerable	3		ShA
Vulnerable	8		ShA
Vulnerable	13	62	LgA
Vulnerable	12	50	LgA
Resilient	9	25	LgA
Vulnerable	10	32	LgA
Vulnerable	9	25	LgA
Vulnerable	12	50	LgA
Vulnerable	8	20	LgA
Resilient	0	0	LgA
Vulnerable	4	6	LgA
Vulnerable	15	95	LgA
Vulnerable	17	145	LgA
Vulnerable	11	40	LgA
Vulnerable	11	40	LgA
Vulnerable	4	6	LgA
Vulnerable	12	50	LgA
Vulnerable	14	77	LgA
Vulnerable	10	32	LgA
Vulnerable	13	62	LgA
Vulnerable	15	95	LgA
Vulnerable	12	50	LgA
Resilient	4	6	LgA
Resilient	5	9	LgA
Vulnerable	13	62	LgA
Vulnerable	13	62	LgA
Resilient	0	0	LgA
Vulnerable	4	6	LgA
Resilient	0	0	LgA
Vulnerable	15	95	LgA
Vulnerable	12	50	LgA
Vulnerable	12	50	LgA
Resilient	0	0	LgA
Resilient	1	1	LgA
Vulnerable	12	50	LgA
Resilient	2	2	LgA
Resilient	8	20	LgA
Resilient	2	2	LgA
Vulnerable	11	40	LgA
Vulnerable	16	118	LgA
Vulnerable	12	50	LgA
Vulnerable	9	25	LgA
Vulnerable	11	40	LgA
Resilient	6	12	LgA
Vulnerable	12	50	LgA
Vulnerable	11	40	LgA
Vulnerable	8	20	LgA
Vulnerable	17	145	LgA
Vulnerable	6	12	LgA
Vulnerable	10	50	LgA
Vulnerable	14	77	LgA
Vulnerable	10	50	LgA
Vulnerable	10	50	LgA
Vulnerable	15	95	LgA
Vulnerable	16	118	LgA
Vulnerable	6	12	LgA
Vulnerable	13	62	LgA
Vulnerable	13	62	LgA
Vulnerable	14	77	LgA
Vulnerable	9	25	LgA
Vulnerable	13	62	LgA
Vulnerable	12	50	LgA
Vulnerable	16	118	LgA
Vulnerable	12	50	LgA
Vulnerable	14	77	LgA
Vulnerable	0	0	LgA
Resilient	2	2	LgA
Vulnerable	11	40	LgA
Vulnerable	11	40	LgA
Vulnerable	12	50	LgA
Vulnerable	1	1	LgA
Vulnerable	16	118	LgA
Vulnerable	15	95	LgA
Vulnerable	11	40	LgA
Vulnerable	0	0	LgA
Vulnerable	13	62	LgA
Vulnerable	7	15	LgA
Vulnerable	12	50	LgA
Vulnerable	9	25	LgA
Vulnerable	11	40	LgA
Vulnerable	3	4	LgA
Vulnerable	12	50	LgA
Vulnerable	9	25	LgA
Vulnerable	12	50	LgA
Vulnerable	12	50	LgA
Vulnerable	11	40	LgA
Resilient	1	1	LgA
Vulnerable	15	95	LgA
Vulnerable	11	40	LgA
Vulnerable	10	32	LgA
Vulnerable	12	50	LgA
Vulnerable	11	40	LgA
Vulnerable	17	145	LgA
Resilient	16	118	LgA
Vulnerable	5	9	LgA
Vulnerable	12	50	LgA
Vulnerable	13	62	LgA
Vulnerable	13	62	LgA
Vulnerable	10	32	LgA
Vulnerable	12	50	LgA
Resilient	1	1	LgA
Vulnerable	10	32	LgA
Vulnerable	8	20	LgA
Vulnerable	1	1	LgA
Vulnerable	13	62	LgA
Vulnerable	4	6	LgA
Vulnerable	12	50	LgA
Vulnerable	11	40	LgA
Vulnerable	14	77	LgA
Resilient	7	15	LgA
Vulnerable	10	32	LgA
Vulnerable	11	40	LgA
Vulnerable	13	62	LgA
Vulnerable	0	0	LgA
Vulnerable	9	25	LgA
Vulnerable	1	1	LgA
Vulnerable	11	40	LgA
Vulnerable	0	0	LgA
Vulnerable	0	0	LgA
Vulnerable	9	25	LgA
Vulnerable	3	4	LgA
Vulnerable	15	95	LgA
Vulnerable	8	20	LgA
Vulnerable	10	32	LgA
Vulnerable	13	62	LgA
Vulnerable	14	77	LgA
Resilient	2	2	LgA
Resilient	1	1	LgA
Resilient	0	0	LgA
Resilient	0	0	LgA
Vulnerable	9	25	LgA
Vulnerable	12	50	LgA
Vulnerable	14	77	LgA
Resilient	0	0	LgA
Vulnerable	12	50	LgA
Vulnerable	10	32	LgA
Vulnerable	12	50	LgA
Resilient	2	2	LgA
Vulnerable	16	118	LgA
Vulnerable	14	77	LgA
Vulnerable	9	25	LgA
Vulnerable	16	118	LgA
Vulnerable	14	77	LgA
Vulnerable	12	50	LgA
Vulnerable	10	32	LgA
Vulnerable	12	50	LgA
Vulnerable	11	40	LgA
Vulnerable	5	9	LgA
Resilient	13	62	LgA
Vulnerable	15	95	LgA
Resilient	0	0	LgA
Vulnerable	11	40	LgA
Vulnerable	9	25	LgA
Vulnerable	11	40	LgA
Vulnerable	4	6	LgA
Resilient	1	1	LgA
Resilient	6	12	LgA
Vulnerable	5	9	LgA
Resilient	0	0	LgA
Vulnerable	3	4	LgA
Vulnerable	13	62	LgA
Vulnerable	7	15	LgA
Vulnerable	12	50	LgA
Resilient	1	1	LgA
Vulnerable	13	62	LgA
Vulnerable	8	20	LgA
Resilient	2	2	LgA
Vulnerable	13	62	LgA
Vulnerable	11	40	LgA
Vulnerable	8	20	LgA
Vulnerable	13	62	LgA
Resilient	1	1	LgA
Vulnerable	16	118	LgA
Resilient	5	9	LgA
Vulnerable	11	40	LgA
Vulnerable	10	32	LgA
Vulnerable	10	32	LgA
Resilient	0	0	LgA
Resilient	0	0	LgA
Vulnerable	10	32	LgA
Resilient	0	0	LgA
Vulnerable	9	25	LgA
Vulnerable	8	20	LgA
Vulnerable	12	50	LgA
Vulnerable	13	62	LgA
Vulnerable	11	40	LgA
Resilient	4	6	LgA
Vulnerable	11	40	LgA
Vulnerable	6	12	LgA
Vulnerable	12	50	LgA
Vulnerable	12	50	LgA
Vulnerable	11	40	LgA
Vulnerable	11	40	LgA
Resilient	1	1	LgA
Resilient	0	0	LgA
Resilient	0	0	LgA
Vulnerable	7	15	LgA
Vulnerable	11	40	LgA
Resilient	16	118	LgA
Vulnerable	7	15	LgA
Resilient	4	6	LgA
Vulnerable	12	50	LgA
Resilient	1	1	LgA
Vulnerable	14	77	LgA
Vulnerable	12	50	LgA
Resilient	0	0	LgA
Vulnerable	8	20	LgA
Resilient	0	0	LgA
Resilient	2	2	LgA
Resilient	0	0	LgA
Resilient	2	2	LgA
Vulnerable	12	50	LgA
Vulnerable	10	32	LgA
Resilient	3	4	LgA
Vulnerable	11	40	LgA
Resilient	2	2	LgA
Vulnerable	9	25	LgA
Vulnerable	8	20	LgA
Vulnerable	10	32	LgA
Vulnerable	10	32	LgA
Resilient	0	0	LgA
Vulnerable	10	32	LgA
Vulnerable	19	219	LgA
Vulnerable	12	50	LgA
Vulnerable	6	12	LgA
Vulnerable	3	4	LgA
Vulnerable	8	20	LgA
Resilient	1	1	LgA
Vulnerable	18	178	LgA
Vulnerable	14	77	LgA
Vulnerable	10	32	LgA
Vulnerable	9	25	LgA
Vulnerable	5	9	LgA
Vulnerable	13	62	LgA
Vulnerable	12	50	LgA
Vulnerable	1	1	LgA
Vulnerable	15	95	LgA
Vulnerable	3	4	LgA
Vulnerable	11	40	LgA
Vulnerable	13	62	LgA
Vulnerable	1	1	LgA
Vulnerable	12	50	LgA
Vulnerable	1	1	LgA
Vulnerable	10	32	LgA
Vulnerable	15	95	LgA
Vulnerable	18	178	LgA
Vulnerable	19	219	LgA
Resilient	2	2	LgA
Vulnerable	10	32	LgA
Vulnerable	13	62	LgA
Vulnerable	15	95	LgA
Resilient	7	15	LgA
Vulnerable	12	50	LgA
Vulnerable	11	40	LgA
Vulnerable	8	20	LgA
Vulnerable	14	77	LgA
Vulnerable	14	77	LgA
Vulnerable	2	2	LgA
Vulnerable	16	118	LgA
Vulnerable	14	77	LgA
Vulnerable	16	118	LgA
Resilient	0	0	LgA
Vulnerable	9	25	LgA
Vulnerable	13	62	LgA
Vulnerable	13	62	LgA
Vulnerable	14	77	LgA
Resilient	0	0	LgA
Vulnerable	12	50	LgA
Vulnerable	12	50	LgA
Vulnerable	9	25	LgA
Vulnerable	11	40	LgA
Resilient	1	1	LgA
Vulnerable	13	62	LgA
Vulnerable	0	0	LgA
Resilient	9	25	LgA
Vulnerable	4	6	LgA
Vulnerable	4	6	LgA
Vulnerable	2	2	LgA
Vulnerable	1	1	LgA
Vulnerable	10	32	LgA
Resilient	14	77	LgA
Vulnerable	13	62	LgA
Resilient	9	25	LgA
Vulnerable	12	32	LgA
Vulnerable	2	2	LgA
Resilient	11	40	LgA
Vulnerable	15	95	LgA
Vulnerable	13	62	LgA
Vulnerable	10	32	LgA
Vulnerable	16	118	LgA
Vulnerable	5	9	LgA
Vulnerable	1	1	LgA
Vulnerable	12	50	LgA
Vulnerable	11	62	LgA
Vulnerable	12	77	LgA
Vulnerable	13	95	LgA
Vulnerable	14	118	LgA
Vulnerable	17	145	LgA
Vulnerable	14	77	LgA
Vulnerable	0	0	LgA
Vulnerable	1	1	LgA
Resilient	1	1	LgA
Resilient	0	0	LgA
Resilient	1	1	LgA
Vulnerable	0	0	LgA
Vulnerable	17	145	LgA
Resilient	0	0	LgA
Vulnerable	10	32	LgA
Vulnerable	0	0	LgA
Vulnerable	3	4	LgA
Vulnerable	0	0	LgA
Vulnerable	3	4	LgA
Vulnerable	9	25	LgA
Resilient	2	2	LgA
Resilient	2	2	LgA
Vulnerable	14	77	LgA
Resilient	6	12	LgA
Vulnerable	8	20	LgA
Vulnerable	8	20	LgA
Vulnerable	2	2	LgA
Resilient	1	1	LgA
Vulnerable	12	50	LgA
Vulnerable	3	4	LgA
Vulnerable	2	2	LgA
Vulnerable	15	95	LgA
Vulnerable	16	118	LgA
Vulnerable	7	15	LgA
Vulnerable	9	32	LgA
Vulnerable	12	62	LgA
Vulnerable	14	95	LgA
Vulnerable	12	62	LgA
Vulnerable	23	603	LgA
Resilient	3	6	LgA
Vulnerable	13	77	LgA
Vulnerable	15	118	LgA
Resilient	0	0	LgA
Vulnerable	9	32	LgA
Vulnerable	12	62	LgA
Vulnerable	10	40	LgA
Resilient	7	20	LgA
Vulnerable	13	77	LgA
Resilient	0	0	LgA
Resilient	2	2	LgA
Resilient	0	0	LgA
Vulnerable	8	25	LgA
Vulnerable	15	118	LgA
Vulnerable	9	32	LgA
Vulnerable	9	32	LgA
Vulnerable	12	62	LgA
Vulnerable	14	95	LgA
Vulnerable	7	20	LgA
Vulnerable	2	4	LgA
Resilient	1	2	LgA
Resilient	2	2	LgA
Vulnerable	10	40	LgA
Vulnerable	15	118	LgA
Vulnerable	12	62	LgA
Vulnerable	9	32	LgA
Vulnerable	5	12	LgA
Vulnerable	5	12	LgA
Vulnerable	12	62	LgA
Vulnerable	9	32	LgA
Resilient	1	1	LgA
Vulnerable	10	40	LgA
Resilient	7	20	LgA
Vulnerable	7	20	LgA
Resilient	3	6	LgA
Vulnerable	5	12	LgA
Vulnerable	11	50	LgA
Vulnerable	8	25	LgA
Vulnerable	14	95	LgA
Resilient	0	0	LgA
Vulnerable	13	77	LgA
Vulnerable	12	62	LgA
Vulnerable	13	77	LgA
Vulnerable	12	50	LgA
Vulnerable	14	95	LgA
Vulnerable	1	2	LgA
Vulnerable	13	77	LgA
Vulnerable	17	178	LgA
Vulnerable	17	178	LgA
Vulnerable	14	95	LgA
Vulnerable	8	25	LgA
Vulnerable	3	6	LgA
Vulnerable	15	118	LgA
Vulnerable	14	95	LgA
Vulnerable	11	50	LgA
Resilient	0	0	LgA
Vulnerable	13	77	LgA
Vulnerable	14	95	LgA
Vulnerable	22	492	LgA
Vulnerable	17	178	LgA
Vulnerable	2	4	LgA
Resilient	4	9	LgA
Resilient	2	4	LgA
Vulnerable	6	15	LgA
Vulnerable	10	40	LgA
Vulnerable	10	40	LgA
Vulnerable	1	1	LgA
Vulnerable	13	77	LgA
Vulnerable	10	40	LgA
Resilient	0	0	LgA
Resilient	3	4	LgA
Resilient	0	0	LgA
Vulnerable	13	77	LgA
Vulnerable	12	62	LgA
Vulnerable	17	178	LgA
Vulnerable	8	25	LgA
Resilient	12	62	LgA
Vulnerable	12	62	LgA
Vulnerable	13	77	LgA
Vulnerable	14	95	LgA
Vulnerable	0	0	LgA
Resilient	1	1	LgA
Vulnerable	10	40	LgA
Resilient	2	4	LgA
Vulnerable	12	62	LgA
Vulnerable	11	50	LgA
Vulnerable	11	50	LgA
Vulnerable	9	32	LgA
Vulnerable	11	50	LgA
Resilient	0	0	LgA
Vulnerable	10	40	LgA
Vulnerable	24	737	LgA
Vulnerable	16	145	LgA
Vulnerable	14	95	LgA
Resilient	1	2	LgA
Vulnerable	9	32	LgA
Vulnerable	10	40	LgA
Vulnerable	13	77	LgA
Vulnerable	12	62	LgA
Vulnerable	0	0	LgA
Vulnerable	13	77	LgA
Vulnerable	20	328	LgA
Resilient	6	15	LgA
Vulnerable	4	9	LgA
Vulnerable	14	95	LgA
Resilient	0	0	LgA
Vulnerable	11	50	LgA
Vulnerable	9	32	LgA
Vulnerable	18	219	LgA
Resilient	1	1	LgA
Vulnerable	14	95	LgA
Vulnerable	0	0	LgA
Vulnerable	9	32	LgA
Vulnerable	8	25	LgA
Vulnerable	14	95	LgA
Vulnerable	6	15	LgA
Vulnerable	10	40	LgA
Resilient	0	0	LgA
Resilient	0	0	LgA
Vulnerable	5	12	LgA
Vulnerable	13	77	LgA
Resilient	3	6	LgA
Resilient	1	1	LgA
Resilient	0	0	LgA
Resilient	0	0	LgA
Resilient	2	2	LgA
Resilient	1	1	LgA
Vulnerable	14	95	LgA
Resilient	11	50	LgA
Resilient	2	4	LgA
Resilient	2	4	LgA
Resilient	1	1	LgA
Resilient	0	0	LgA
Resilient	0	0	LgA
Vulnerable	1	2	LgA
Vulnerable	13	77	LgA
Vulnerable	5	12	LgA
Resilient	0	0	LgA
Vulnerable	1	1	LgA
Vulnerable	12	62	LgA
Vulnerable	8	25	LgA
Vulnerable	7	20	LgA
Resilient	0	0	LgA
Vulnerable	13	77	LgA
Vulnerable	8	25	LgA
Vulnerable	13	77	LgA
Vulnerable	0	0	LgA
Vulnerable	12	62	LgA
Vulnerable	12	62	LgA
Vulnerable	12	62	LgA
Vulnerable	9	32	LgA
Vulnerable	4	9	LgA
Vulnerable	5	12	LgA
Vulnerable	13	77	LgA
Vulnerable	12	62	LgA
Vulnerable	5	12	LgA
Vulnerable	3	6	LgA
Vulnerable	17	178	LgA
Vulnerable	8	25	LgA
Vulnerable	12	62	LgA
Vulnerable	6	15	LgA
Vulnerable	0	0	LgA
Vulnerable	19	268	LgA
Vulnerable	16	145	LgA
Vulnerable	15	118	LgA
Resilient	1	1	LgA
Vulnerable	16	145	LgA
Vulnerable	7	20	LgA
Vulnerable	0	0	LgA
Vulnerable	14	95	LgA
Vulnerable	16	145	LgA
Vulnerable	13	77	LgA
Vulnerable	7	20	LgA
Vulnerable	0	0	LgA
Vulnerable	9	32	LgA
Vulnerable	15	118	LgA
Vulnerable	7	20	LgA
Vulnerable	14	95	LgA
Vulnerable	10	40	LgA
Vulnerable	10	40	LgA
Vulnerable	14	95	LgA
Vulnerable	13	77	LgA
Vulnerable	13		LgA
Vulnerable	17		LgA
Vulnerable	10		LgA
Vulnerable	4		LgA
Resilient	0		LgA
Vulnerable	7		LgA
Vulnerable	6		LgA
Vulnerable	4		LgA
Vulnerable	13		LgA
Vulnerable	11		LgA
Vulnerable	0		LgA
Vulnerable	12		LgA
Vulnerable	9		LgA
Resilient	0		LgA
Vulnerable	10		LgA
Vulnerable	7		LgA
Vulnerable	13		LgA
Vulnerable	11		LgA
Vulnerable	6		LgA
Resilient	4		LgA
Vulnerable	16		LgA
Resilient	1		LgA
Vulnerable	16		LgA
Vulnerable	2		LgA
Resilient	2		LgA
Vulnerable	13		LgA
Vulnerable	11		LgA
Vulnerable	17		LgA
Resilient	0		LgA
Resilient	1		LgA
Vulnerable	12		LgA
Vulnerable	13		LgA
Vulnerable	10		LgA
Vulnerable	8		LgA
Vulnerable	13		LgA
Vulnerable	17		LgA
Vulnerable	1		LgA
Vulnerable	9		LgA
Vulnerable	5		LgA
Vulnerable	12		LgA
Vulnerable	7		LgA
Vulnerable	11		LgA
Resilient	1		LgA
Vulnerable	0		LgA
Vulnerable	9		LgA
Resilient	0		LgA
Resilient	3		LgA
Vulnerable	0		LgA
Resilient	2		LgA
Vulnerable	15		LgA
Vulnerable	9		LgA
Vulnerable	6		LgA

## Sheet: Panels D
split	shock
Vulnerable	26
Vulnerable	26
Resilient	4
Vulnerable	15
Vulnerable	3
Vulnerable	14
Vulnerable	10
Resilient	0
Vulnerable	16
Vulnerable	11
Vulnerable	27
Vulnerable	18
Vulnerable	20
Vulnerable	5
Vulnerable	34
Vulnerable	11
Vulnerable	22
Vulnerable	7
Vulnerable	20
Vulnerable	19
Resilient	2
Resilient	4
Vulnerable	3
Vulnerable	3
Resilient	1
Vulnerable	1
Resilient	7
Vulnerable	13
Vulnerable	1
Vulnerable	1
Resilient	9
Resilient	2
Vulnerable	25
Resilient	2
Resilient	6
Resilient	5
Vulnerable	1
Vulnerable	16
Vulnerable	3
Vulnerable	26
Vulnerable	2
Resilient	2
Vulnerable	4
Vulnerable	12
Vulnerable	18
Vulnerable	13
Vulnerable	21
Vulnerable	21
Vulnerable	12
Vulnerable	17
Vulnerable	23
Vulnerable	27
Vulnerable	21
Vulnerable	7
Vulnerable	30
Vulnerable	14
Vulnerable	8
Vulnerable	8
Vulnerable	15
Vulnerable	23
Vulnerable	17
Vulnerable	32
Vulnerable	42
Vulnerable	8
Resilient	14
Vulnerable	6
Vulnerable	16
Vulnerable	5
Vulnerable	1
Vulnerable	11
Vulnerable	0
Vulnerable	3
Vulnerable	2
Vulnerable	12
Vulnerable	4
Vulnerable	11
Vulnerable	4
Vulnerable	10
Vulnerable	1
Vulnerable	17
Vulnerable	19
Vulnerable	8
Vulnerable	22
Vulnerable	2
Resilient	0
Vulnerable	14
Vulnerable	6
Vulnerable	0
Vulnerable	20
Vulnerable	21
Vulnerable	11
Resilient	8
Vulnerable	17
Vulnerable	23
Vulnerable	14
Vulnerable	16
Vulnerable	4
Vulnerable	19
Resilient	12
Vulnerable	11
Vulnerable	9
Vulnerable	7
Vulnerable	20
Vulnerable	17
Vulnerable	22
Vulnerable	31
Vulnerable	27
Resilient	9
Vulnerable	2
Vulnerable	2
Vulnerable	5
Vulnerable	0
Vulnerable	1
Vulnerable	1
Vulnerable	21
Vulnerable	0
Vulnerable	13
Vulnerable	16
Vulnerable	2
Vulnerable	4
Vulnerable	4
Vulnerable	15
Vulnerable	22
Vulnerable	22
Resilient	2
Resilient	5
Resilient	1
Resilient	4
Vulnerable	21
Vulnerable	21
Vulnerable	23
Resilient	0
Vulnerable	21
Vulnerable	26
Vulnerable	27
Resilient	14
Vulnerable	22
Vulnerable	10
Vulnerable	9
Vulnerable	26
Vulnerable	24
Vulnerable	20
Vulnerable	9
Vulnerable	4
Vulnerable	26
Vulnerable	25
Resilient	25
Vulnerable	14
Resilient	1
Vulnerable	8
Vulnerable	15
Vulnerable	21
Vulnerable	24
Resilient	4
Resilient	20
Vulnerable	20
Resilient	15
Vulnerable	5
Vulnerable	5
Vulnerable	27
Vulnerable	10
Resilient	13
Vulnerable	1
Vulnerable	10
Resilient	2
Vulnerable	25
Vulnerable	9
Vulnerable	7
Vulnerable	16
Resilient	0
Vulnerable	18
Resilient	1
Vulnerable	35
Vulnerable	8
Vulnerable	24
Resilient	11
Resilient	2
Vulnerable	6
Resilient	8
Vulnerable	30
Vulnerable	14
Vulnerable	9
Vulnerable	23
Resilient	14
Vulnerable	9
Vulnerable	10
Vulnerable	14
Vulnerable	22
Vulnerable	29
Vulnerable	6
Resilient	8
Resilient	2
Resilient	0
Vulnerable	5
Vulnerable	0
Resilient	5
Vulnerable	7
Resilient	4
Vulnerable	5
Resilient	4
Vulnerable	16
Vulnerable	3
Resilient	2
Vulnerable	15
Resilient	1
Resilient	2
Resilient	1
Resilient	8
Vulnerable	8
Vulnerable	5
Resilient	7
Vulnerable	13
Resilient	2
Vulnerable	1
Vulnerable	14
Vulnerable	7
Vulnerable	5
Resilient	3
Vulnerable	2
Vulnerable	19
Vulnerable	10
Vulnerable	4
Vulnerable	8
Vulnerable	7
Resilient	0
Vulnerable	6
Vulnerable	10
Vulnerable	14
Vulnerable	10
Vulnerable	0
Vulnerable	5
Vulnerable	3
Vulnerable	2
Vulnerable	12
Vulnerable	17
Vulnerable	10
Vulnerable	15
Vulnerable	4
Vulnerable	10
Vulnerable	8
Vulnerable	6
Vulnerable	8
Vulnerable	12
Vulnerable	9
Resilient	2
Vulnerable	14
Vulnerable	11
Vulnerable	4
Resilient	7
Vulnerable	21
Vulnerable	2
Vulnerable	7
Vulnerable	23
Vulnerable	19
Vulnerable	4
Vulnerable	27
Vulnerable	4
Vulnerable	5
Resilient	0
Vulnerable	9
Vulnerable	15
Vulnerable	23
Vulnerable	14
Resilient	3
Vulnerable	10
Vulnerable	2
Vulnerable	5
Vulnerable	4
Resilient	4
Vulnerable	26
Vulnerable	2
Resilient	4
Vulnerable	12
Vulnerable	44
Vulnerable	10
Vulnerable	1
Vulnerable	20
Resilient	59
Vulnerable	4
Resilient	1
Vulnerable	32
Vulnerable	3
Resilient	63
Vulnerable	1
Vulnerable	38
Vulnerable	24
Vulnerable	4
Vulnerable	21
Vulnerable	35
Vulnerable	24
Vulnerable	8
Vulnerable	3
Vulnerable	42
Vulnerable	22
Vulnerable	39
Vulnerable	27
Vulnerable	21
Vulnerable	4
Resilient	5
Resilient	0
Resilient	1
Vulnerable	29
Vulnerable	35
Resilient	1
Vulnerable	5
Vulnerable	11
Vulnerable	11
Vulnerable	15
Vulnerable	23
Vulnerable	3
Resilient	2
Resilient	10
Vulnerable	14
Resilient	3
Vulnerable	3
Vulnerable	18
Vulnerable	17
Resilient	1
Vulnerable	5
Vulnerable	16
Vulnerable	14
Vulnerable	3
Vulnerable	16
Vulnerable	24
Vulnerable	24
Vulnerable	18
Vulnerable	13
Vulnerable	7
Vulnerable	3
Resilient	1
Vulnerable	14
Vulnerable	14
Resilient	6
Vulnerable	12
Vulnerable	10
Vulnerable	7
Resilient	4
Vulnerable	18
Resilient	4
Resilient	7
Resilient	6
Vulnerable	20
Vulnerable	6
Vulnerable	28
Vulnerable	22
Vulnerable	20
Vulnerable	32
Vulnerable	9
Vulnerable	0
Resilient	1
Resilient	0
Vulnerable	1
Vulnerable	20
Vulnerable	10
Vulnerable	1
Vulnerable	20
Vulnerable	4
Vulnerable	9
Vulnerable	6
Resilient	3
Vulnerable	7
Resilient	4
Vulnerable	6
Resilient	13
Vulnerable	2
Vulnerable	11
Vulnerable	1
Vulnerable	10
Resilient	1
Vulnerable	3
Vulnerable	9
Vulnerable	3
Vulnerable	14
Vulnerable	5
Vulnerable	7
Vulnerable	24
Vulnerable	19
Vulnerable	17
Vulnerable	10
Vulnerable	3
Vulnerable	21
Vulnerable	8
Vulnerable	16
Vulnerable	1
Resilient	4
Vulnerable	19
Vulnerable	8
Vulnerable	24
Vulnerable	32
Vulnerable	1
Resilient	7
Resilient	12
Vulnerable	9
Vulnerable	7
Vulnerable	11
Vulnerable	9
Vulnerable	0
Vulnerable	12
Resilient	4
Resilient	3
Resilient	4
Vulnerable	9
Vulnerable	5
Vulnerable	8
Vulnerable	18
Resilient	2
Vulnerable	4
Vulnerable	18
Vulnerable	9
Vulnerable	4
Resilient	3
Vulnerable	0
Resilient	2
Vulnerable	8
Vulnerable	5
Vulnerable	6
Vulnerable	9
Vulnerable	12
Resilient	1
Vulnerable	12
Vulnerable	6
Vulnerable	19
Vulnerable	8
Resilient	2
Vulnerable	4
Vulnerable	8
Vulnerable	0
Vulnerable	6
Vulnerable	0
Vulnerable	22
Vulnerable	2
Resilient	8
Vulnerable	4
Vulnerable	7
Resilient	2
Vulnerable	11
Vulnerable	29
Vulnerable	10
Resilient	12
Vulnerable	54
Vulnerable	0
Vulnerable	20
Vulnerable	25
Vulnerable	33
Vulnerable	5
Vulnerable	11
Resilient	2
Resilient	21
Vulnerable	2
Vulnerable	3
Resilient	2
Resilient	6
Resilient	1
Resilient	1
Resilient	2
Resilient	13
Vulnerable	4
Resilient	1
Resilient	1
Resilient	4
Resilient	3
Resilient	0
Resilient	5
Vulnerable	2
Vulnerable	1
Vulnerable	21
Resilient	6
Vulnerable	37
Vulnerable	19
Vulnerable	20
Vulnerable	21
Resilient	0
Vulnerable	25
Vulnerable	29
Vulnerable	22
Vulnerable	34
Vulnerable	16
Vulnerable	26
Vulnerable	35
Vulnerable	37
Vulnerable	14
Vulnerable	9
Vulnerable	4
Vulnerable	24
Vulnerable	4
Vulnerable	23
Vulnerable	37
Vulnerable	24
Vulnerable	18
Vulnerable	0
Vulnerable	66
Vulnerable	17
Vulnerable	13
Vulnerable	26
Resilient	5
Vulnerable	8
Vulnerable	21
Vulnerable	7
Vulnerable	4
Vulnerable	15
Vulnerable	22
Vulnerable	11
Vulnerable	9
Vulnerable	13
Vulnerable	30
Vulnerable	3
Vulnerable	6
Vulnerable	6
Vulnerable	26
Vulnerable	13
Vulnerable	21

## Sheet: Panel E
split	irritibility	type
Vulnerable	0.666667	aggres.
Vulnerable	0	aggres.
Vulnerable	0.333333	aggres.
Vulnerable	-1.33333	aggres.
Vulnerable	-1.66667	aggres.
Vulnerable	-5.66667	aggres.
Vulnerable	-3.33333	aggres.
Vulnerable	-3.66667	aggres.
Vulnerable	1	aggres.
Vulnerable	13	aggres.
Vulnerable	19.3333	aggres.
Vulnerable	0	aggres.
Vulnerable	2.33333	aggres.
Vulnerable	1.33333	aggres.
Vulnerable	0.333333	aggres.
Vulnerable	0.666667	aggres.
Vulnerable	-2	aggres.
Vulnerable	7.33333	aggres.
Vulnerable	0.333333	aggres.
Vulnerable	0.333333	aggres.
Vulnerable	-2.33333	aggres.
Resilient	0.666667	aggres.
Vulnerable	0.333333	aggres.
Vulnerable	0	aggres.
Vulnerable	-3	aggres.
Vulnerable	-2	aggres.
Vulnerable	-1	aggres.
Vulnerable	-5	aggres.
Vulnerable	-1.33333	aggres.
Vulnerable	4	aggres.
Vulnerable	2.33333	aggres.
Vulnerable	-1	aggres.
Vulnerable	7	aggres.
Vulnerable	1	aggres.
Vulnerable	16.3333	aggres.
Vulnerable	1.66667	aggres.
Vulnerable	0	aggres.
Vulnerable	10.6667	aggres.
Vulnerable	4	aggres.
Vulnerable	6	aggres.
Resilient	-4.66667	aggres.
Vulnerable	-2	aggres.
Vulnerable	-1	aggres.
Vulnerable	-1.66667	aggres.
Vulnerable	-1	aggres.
Vulnerable	2	aggres.
Vulnerable	0.666667	aggres.
Resilient	-2.33333	aggres.
Vulnerable	-2.33333	aggres.
Vulnerable	12	aggres.
Vulnerable	1.33333	aggres.
Vulnerable	13	aggres.
Vulnerable	0	aggres.
Vulnerable	3	aggres.
Resilient	0	aggres.
Vulnerable	0.333333	aggres.
Vulnerable	4	aggres.
Vulnerable	0.333333	aggres.
Vulnerable	-2.66667	aggres.
Vulnerable	-2.33333	aggres.
Vulnerable	0	aggres.
Vulnerable	1.66667	aggres.
Vulnerable	0	aggres.
Resilient	0	aggres.
Vulnerable	-1	aggres.
Vulnerable	-4.66667	aggres.
Vulnerable	-6	aggres.
Vulnerable	0.333333	aggres.
Vulnerable	6.33333	aggres.
Vulnerable	5.33333	aggres.
Vulnerable	5.33333	aggres.
Vulnerable	1.33333	aggres.
Vulnerable	9.66667	aggres.
Vulnerable	3.66667	aggres.
Vulnerable	4.66667	aggres.
Vulnerable	0.666667	aggres.
Vulnerable	5.33333	aggres.
Vulnerable	3.33333	aggres.
Vulnerable	-0.333333	aggres.
Vulnerable	3	aggres.
Resilient	8.33333	aggres.
Resilient	3.33333	aggres.
Resilient	3.66667	aggres.
Resilient	1.66667	aggres.
Vulnerable	-3	aggres.
Vulnerable	0.333333	aggres.
Vulnerable	-2.33333	aggres.
Resilient	-0.333333	aggres.
Vulnerable	7	aggres.
Vulnerable	1.33333	aggres.
Vulnerable	1	aggres.
Resilient	4.33333	aggres.
Vulnerable	0	aggres.
Vulnerable	4.33333	aggres.
Vulnerable	0	aggres.
Vulnerable	8.66667	aggres.
Vulnerable	0.666667	aggres.
Vulnerable	0.333333	aggres.
Vulnerable	3.66667	aggres.
Vulnerable	1	aggres.
Vulnerable	1.66667	aggres.
Vulnerable	-0.333333	aggres.
Resilient	0.666667	aggres.
Vulnerable	7.33333	aggres.
Resilient	2.66667	aggres.
Vulnerable	5.33333	aggres.
Vulnerable	5.33333	aggres.
Vulnerable	4	aggres.
Vulnerable	6	aggres.
Resilient	3.33333	aggres.
Resilient	1.33333	aggres.
Vulnerable	1.66667	aggres.
Resilient	0.666667	aggres.
Vulnerable	13.6667	aggres.
Vulnerable	4.33333	aggres.
Vulnerable	6.33333	aggres.
Vulnerable	-0.333333	aggres.
Resilient	11.3333	aggres.
Vulnerable	1.33333	aggres.
Vulnerable	6.33333	aggres.
Resilient	0.333333	aggres.
Vulnerable	4	aggres.
Vulnerable	-0.666667	aggres.
Vulnerable	1	aggres.
Resilient	1	aggres.
Vulnerable	8	aggres.
Resilient	1	aggres.
Vulnerable	6	aggres.
Vulnerable	4	aggres.
Vulnerable	-1	aggres.
Resilient	2.5	aggres.
Resilient	-0.5	aggres.
Vulnerable	5	aggres.
Resilient	1.5	aggres.
Vulnerable	9	aggres.
Vulnerable	3	aggres.
Vulnerable	8	aggres.
Vulnerable	12.5	aggres.
Vulnerable	13.5	aggres.
Vulnerable	12	aggres.
Resilient	-7.5	aggres.
Vulnerable	-2.5	aggres.
Vulnerable	0	aggres.
Vulnerable	0.5	aggres.
Vulnerable	0	aggres.
Vulnerable	1	aggres.
Vulnerable	-0.5	aggres.
Resilient	11.5	aggres.
Resilient	5	aggres.
Resilient	5	aggres.
Vulnerable	-1	aggres.
Vulnerable	22	aggres.
Resilient	5	aggres.
Vulnerable	18	aggres.
Resilient	9	aggres.
Vulnerable	20.5	aggres.
Resilient	16	aggres.
Vulnerable	12	aggres.
Vulnerable	14.5	aggres.
Resilient	-1.5	aggres.
Vulnerable	1.5	aggres.
Resilient	10	aggres.
Resilient	9.5	aggres.
Resilient	0	aggres.
Resilient	1	aggres.
Vulnerable	2.5	aggres.
Vulnerable	-10.5	aggres.
Resilient	6	aggres.
Vulnerable	15	aggres.
Resilient	7	aggres.
Vulnerable	7	aggres.
Vulnerable	7	aggres.
Vulnerable	1	aggres.
Vulnerable	9	aggres.
Resilient	2	aggres.
Vulnerable	-2	aggres.
Vulnerable	-0.5	aggres.
Vulnerable	6	aggres.
Vulnerable	12	aggres.
Vulnerable	1.5	aggres.
Vulnerable	6.5	aggres.
Resilient	6.5	aggres.
Vulnerable	16	aggres.
Vulnerable	-1	aggres.
Vulnerable	-3	aggres.
Vulnerable	14.5	aggres.
Vulnerable	7	aggres.
Vulnerable	0	aggres.
Vulnerable	9.5	aggres.
Vulnerable	1.5	aggres.
Vulnerable	12.5	aggres.
Vulnerable	2.5	aggres.
Vulnerable	-6	aggres.
Vulnerable	7	aggres.
Vulnerable	6.5	aggres.
Vulnerable	5.5	aggres.
Vulnerable	-2.5	aggres.
Vulnerable	5	aggres.
Vulnerable	11	aggres.
Vulnerable	-0.5	aggres.
Vulnerable	3.5	aggres.
Resilient	-3	aggres.
Vulnerable	22.5	aggres.
Vulnerable	-3.5	aggres.
Vulnerable	5	aggres.
Resilient	12	aggres.
Vulnerable	2.5	aggres.
Vulnerable	1.5	aggres.
Vulnerable	8	aggres.
Vulnerable	18.5	aggres.
Vulnerable	-1.5	aggres.
Vulnerable	7.5	aggres.
Vulnerable	8	aggres.
Vulnerable	6	aggres.
Vulnerable	-1.5	aggres.
Resilient	-2	aggres.
Vulnerable	6	aggres.
Vulnerable	4	aggres.
Vulnerable	-1.5	aggres.
Vulnerable	12.5	aggres.
Resilient	2.5	aggres.
Vulnerable	-1.5	aggres.
Vulnerable	3.5	aggres.
Vulnerable	0.5	aggres.
Vulnerable	5.5	aggres.
Resilient	-2.5	aggres.
Vulnerable	1	aggres.
Vulnerable	0	aggres.
Resilient	7.66667	aggres.
Vulnerable	0.666667	aggres.
Vulnerable	-5	aggres.
Vulnerable	5.66667	aggres.
Vulnerable	-1.33333	aggres.
Resilient	15.3333	aggres.
Vulnerable	3	aggres.
Resilient	-0.666667	aggres.
Vulnerable	2	aggres.
Vulnerable	1.66667	aggres.
Resilient	7	aggres.
Vulnerable	7.66667	aggres.
Vulnerable	-2.66667	aggres.
Vulnerable	-0.333333	aggres.
Vulnerable	-0.666667	aggres.
Vulnerable	8	aggres.
Vulnerable	0.333333	aggres.
Vulnerable	19.6667	aggres.
Vulnerable	-1	aggres.
Vulnerable	-2	aggres.
Vulnerable	2.33333	aggres.
Vulnerable	13	aggres.
Vulnerable	-3	aggres.
Vulnerable	-1	aggres.
Vulnerable	-3.66667	aggres.
Vulnerable	0	aggres.
Resilient	21	aggres.
Resilient	1	aggres.
Resilient	9.66667	aggres.
Vulnerable	1	aggres.
Vulnerable	23.3333	aggres.
Resilient	1.33333	aggres.
Vulnerable	-6.33333	aggres.
Vulnerable	14.6667	aggres.
Vulnerable	5.66667	aggres.
Vulnerable	8.33333	aggres.
Vulnerable	17.3333	aggres.
Vulnerable	5	aggres.
Resilient	-4	aggres.
Resilient	4	aggres.
Vulnerable	-6.66667	aggres.
Resilient	17.6667	aggres.
Vulnerable	-1.66667	aggres.
Vulnerable	-4	aggres.
Resilient	3.66667	aggres.
Vulnerable	21.6667	aggres.
Vulnerable	-1.33333	aggres.
Vulnerable	-2.33333	aggres.
Vulnerable	-3.66667	aggres.
Vulnerable	-1.66667	aggres.
Vulnerable	8.33333	aggres.
Vulnerable	2.33333	aggres.
Vulnerable	4	aggres.
Vulnerable	3.33333	aggres.
Vulnerable	6	aggres.
Vulnerable	-0.666667	aggres.
Resilient	5.66667	aggres.
Vulnerable	0.333333	aggres.
Vulnerable	0.333333	aggres.
Resilient	-4.33333	aggres.
Vulnerable	7	aggres.
Vulnerable	5	aggres.
Vulnerable	1.66667	aggres.
Resilient	4	aggres.
Vulnerable	0.666667	aggres.
Resilient	7	aggres.
Resilient	2.33333	aggres.
Resilient	1	aggres.
Vulnerable	-0.333333	aggres.
Vulnerable	2.33333	aggres.
Vulnerable	-2.33333	aggres.
Vulnerable	1.33333	aggres.
Vulnerable	1.66667	aggres.
Vulnerable	0.666667	aggres.
Vulnerable	0.333333	aggres.
Vulnerable	-6.66667	aggres.
Resilient	0	aggres.
Resilient	7.66667	aggres.
Vulnerable	0.333333	aggres.
Vulnerable	8	aggres.
Vulnerable	-5.66667	aggres.
Vulnerable	-0.666667	aggres.
Vulnerable	1	aggres.
Vulnerable	5.33333	aggres.
Vulnerable	-2	aggres.
Vulnerable	-6.66667	aggres.
Resilient	1.33333	aggres.
Vulnerable	2.33333	aggres.
Resilient	2.66667	aggres.
Vulnerable	8.66667	aggres.
Resilient	7	aggres.
Vulnerable	0	aggres.
Vulnerable	-0.666667	aggres.
Vulnerable	0.666667	aggres.
Vulnerable	-3.33333	aggres.
Resilient	-3	aggres.
Vulnerable	-4	aggres.
Vulnerable	-4	aggres.
Vulnerable	2.33333	aggres.
Vulnerable	3.33333	aggres.
Vulnerable	-4.66667	aggres.
Vulnerable	0.666667	aggres.
Vulnerable	-5	aggres.
Vulnerable	-2.33333	aggres.
Vulnerable	2	aggres.
Vulnerable	0	aggres.
Vulnerable	12.6667	aggres.
Vulnerable	6	aggres.
Vulnerable	2.33333	aggres.
Vulnerable	-1.33333	aggres.
Vulnerable	8.66667	aggres.
Resilient	0	aggres.
Vulnerable	3	aggres.
Vulnerable	5	aggres.
Vulnerable	-3.66667	aggres.
Vulnerable	3.66667	aggres.
Vulnerable	-4.33333	aggres.
Resilient	-2	aggres.
Resilient	0.333333	aggres.
Vulnerable	-1.33333	aggres.
Vulnerable	2.33333	aggres.
Vulnerable	0	aggres.
Vulnerable	0	aggres.
Vulnerable	-0.666667	aggres.
Vulnerable	-1.66667	aggres.
Resilient	-0.666667	aggres.
Resilient	5.66667	aggres.
Resilient	-0.666667	aggres.
Vulnerable	-1.66667	aggres.
Vulnerable	3.66667	aggres.
Vulnerable	4.33333	aggres.
Vulnerable	4	aggres.
Resilient	-0.666667	aggres.
Vulnerable	-3.33333	aggres.
Vulnerable	3.66667	aggres.
Vulnerable	-1.33333	aggres.
Vulnerable	-1	aggres.
Resilient	-2.66667	aggres.
Vulnerable	1	aggres.
Resilient	-0.333333	aggres.
Vulnerable	2	aggres.
Vulnerable	1	aggres.
Vulnerable	2.33333	aggres.
Vulnerable	3	aggres.
Vulnerable	10	aggres.
Resilient	15.6667	aggres.
Vulnerable	6	aggres.
Vulnerable	9	aggres.
Vulnerable	5	aggres.
Vulnerable	7.33333	aggres.
Resilient	-4.66667	aggres.
Vulnerable	-5.33333	aggres.
Vulnerable	3.66667	defens.
Vulnerable	8	defens.
Vulnerable	9.66667	defens.
Vulnerable	-0.666667	defens.
Vulnerable	8.33333	defens.
Vulnerable	1.66667	defens.
Vulnerable	9	defens.
Vulnerable	3.66667	defens.
Vulnerable	0.666667	defens.
Vulnerable	-9	defens.
Vulnerable	-3	defens.
Vulnerable	-1.33333	defens.
Vulnerable	12.6667	defens.
Vulnerable	-3.66667	defens.
Vulnerable	0	defens.
Vulnerable	-0.333333	defens.
Vulnerable	0	defens.
Vulnerable	-4	defens.
Vulnerable	-0.333333	defens.
Vulnerable	4	defens.
Vulnerable	-2	defens.
Resilient	8	defens.
Vulnerable	8	defens.
Vulnerable	6.33333	defens.
Vulnerable	7.33333	defens.
Vulnerable	-2.33333	defens.
Vulnerable	3.33333	defens.
Vulnerable	0.333333	defens.
Vulnerable	0.666667	defens.
Vulnerable	0.333333	defens.
Vulnerable	0.333333	defens.
Vulnerable	-0.666667	defens.
Vulnerable	2.33333	defens.
Vulnerable	0	defens.
Vulnerable	-4.66667	defens.
Vulnerable	4.66667	defens.
Vulnerable	-4.33333	defens.
Vulnerable	2.33333	defens.
Vulnerable	0.333333	defens.
Vulnerable	-1	defens.
Resilient	1	defens.
Vulnerable	-2.33333	defens.
Vulnerable	6	defens.
Vulnerable	7.66667	defens.
Vulnerable	-10.3333	defens.
Vulnerable	7.66667	defens.
Vulnerable	1.33333	defens.
Resilient	10.6667	defens.
Vulnerable	9.66667	defens.
Vulnerable	9.66667	defens.
Vulnerable	0	defens.
Vulnerable	-13.3333	defens.
Vulnerable	-3.33333	defens.
Vulnerable	-3.33333	defens.
Resilient	10.3333	defens.
Vulnerable	8	defens.
Vulnerable	-0.333333	defens.
Vulnerable	3	defens.
Vulnerable	1.33333	defens.
Vulnerable	-14.3333	defens.
Vulnerable	-4.66667	defens.
Vulnerable	1.33333	defens.
Vulnerable	4	defens.
Resilient	4.66667	defens.
Vulnerable	6.33333	defens.
Vulnerable	1	defens.
Vulnerable	-1.66667	defens.
Vulnerable	8.66667	defens.
Vulnerable	6	defens.
Vulnerable	2.66667	defens.
Vulnerable	0.333333	defens.
Vulnerable	7.33333	defens.
Vulnerable	2.33333	defens.
Vulnerable	3	defens.
Vulnerable	10	defens.
Vulnerable	3	defens.
Vulnerable	3	defens.
Vulnerable	3.33333	defens.
Vulnerable	2.66667	defens.
Vulnerable	-1.33333	defens.
Resilient	2.33333	defens.
Resilient	5	defens.
Resilient	4.66667	defens.
Resilient	3	defens.
Vulnerable	8.66667	defens.
Vulnerable	7	defens.
Vulnerable	5.33333	defens.
Resilient	11	defens.
Vulnerable	3.66667	defens.
Vulnerable	-0.666667	defens.
Vulnerable	-1.33333	defens.
Resilient	6.33333	defens.
Vulnerable	-4.33333	defens.
Vulnerable	1.66667	defens.
Vulnerable	3.66667	defens.
Vulnerable	-7.33333	defens.
Vulnerable	4.33333	defens.
Vulnerable	8.66667	defens.
Vulnerable	-1.33333	defens.
Vulnerable	12	defens.
Vulnerable	4.33333	defens.
Vulnerable	3	defens.
Resilient	-1	defens.
Vulnerable	2	defens.
Resilient	3.66667	defens.
Vulnerable	2	defens.
Vulnerable	1	defens.
Vulnerable	3.33333	defens.
Vulnerable	1.33333	defens.
Resilient	6	defens.
Resilient	6	defens.
Vulnerable	2.33333	defens.
Resilient	0	defens.
Vulnerable	5.66667	defens.
Vulnerable	7	defens.
Vulnerable	0.666667	defens.
Vulnerable	-2.33333	defens.
Resilient	5	defens.
Vulnerable	9.66667	defens.
Vulnerable	1.33333	defens.
Resilient	3.66667	defens.
Vulnerable	1	defens.
Vulnerable	6.66667	defens.
Vulnerable	1	defens.
Resilient	1	defens.
Vulnerable	-1	defens.
Resilient	7	defens.
Vulnerable	0	defens.
Vulnerable	2	defens.
Vulnerable	7	defens.
Resilient	1	defens.
Resilient	-9.5	defens.
Vulnerable	-1.5	defens.
Resilient	1	defens.
Vulnerable	-2	defens.
Vulnerable	-5	defens.
Vulnerable	8	defens.
Vulnerable	-4	defens.
Vulnerable	7.5	defens.
Vulnerable	-2	defens.
Resilient	11.5	defens.
Vulnerable	10	defens.
Vulnerable	5.5	defens.
Vulnerable	-1	defens.
Vulnerable	-5	defens.
Vulnerable	-1	defens.
Vulnerable	-8	defens.
Resilient	10	defens.
Resilient	4.5	defens.
Resilient	-5	defens.
Vulnerable	3.5	defens.
Vulnerable	-2.5	defens.
Resilient	-3.5	defens.
Vulnerable	3.5	defens.
Resilient	0.5	defens.
Vulnerable	-1.5	defens.
Resilient	4	defens.
Vulnerable	4	defens.
Vulnerable	5	defens.
Resilient	-0.5	defens.
Vulnerable	3	defens.
Resilient	3.5	defens.
Resilient	-6	defens.
Resilient	8	defens.
Resilient	3.5	defens.
Vulnerable	1	defens.
Vulnerable	11.5	defens.
Resilient	1.5	defens.
Vulnerable	5	defens.
Resilient	6	defens.
Vulnerable	10	defens.
Vulnerable	2	defens.
Vulnerable	-1	defens.
Vulnerable	6	defens.
Resilient	1	defens.
Vulnerable	0	defens.
Vulnerable	7.5	defens.
Vulnerable	5.5	defens.
Vulnerable	-12	defens.
Vulnerable	3	defens.
Vulnerable	-8.5	defens.
Resilient	0	defens.
Vulnerable	-2	defens.
Vulnerable	-4	defens.
Vulnerable	0	defens.
Vulnerable	-3.5	defens.
Vulnerable	2	defens.
Vulnerable	2	defens.
Vulnerable	-9	defens.
Vulnerable	2.5	defens.
Vulnerable	-2.5	defens.
Vulnerable	2	defens.
Vulnerable	-3.5	defens.
Vulnerable	-1.5	defens.
Vulnerable	-6.5	defens.
Vulnerable	-3	defens.
Vulnerable	-9.5	defens.
Vulnerable	-11.5	defens.
Vulnerable	-11.5	defens.
Vulnerable	-6.5	defens.
Vulnerable	-2	defens.
Resilient	-5.5	defens.
Vulnerable	-4.5	defens.
Vulnerable	5	defens.
Vulnerable	-3	defens.
Resilient	-4.5	defens.
Vulnerable	-3	defens.
Vulnerable	-5	defens.
Vulnerable	-6	defens.
Vulnerable	-10	defens.
Vulnerable	-7.5	defens.
Vulnerable	-13	defens.
Vulnerable	-6.5	defens.
Vulnerable	-4.5	defens.
Vulnerable	-4.5	defens.
Resilient	-0.5	defens.
Vulnerable	-8	defens.
Vulnerable	-5	defens.
Vulnerable	-2	defens.
Vulnerable	-1.5	defens.
Resilient	3.5	defens.
Vulnerable	-4	defens.
Vulnerable	3.5	defens.
Vulnerable	-5	defens.
Vulnerable	-8	defens.
Resilient	-8.5	defens.
Vulnerable	1	defens.
Vulnerable	-2	defens.
Resilient	-0.666667	defens.
Vulnerable	-1.33333	defens.
Vulnerable	-0.333333	defens.
Vulnerable	6.33333	defens.
Vulnerable	2.33333	defens.
Resilient	-1.33333	defens.
Vulnerable	0	defens.
Resilient	0	defens.
Vulnerable	-1.66667	defens.
Vulnerable	2.66667	defens.
Resilient	3.33333	defens.
Vulnerable	2	defens.
Vulnerable	3.66667	defens.
Vulnerable	2.33333	defens.
Vulnerable	-0.666667	defens.
Vulnerable	0.333333	defens.
Vulnerable	1	defens.
Vulnerable	-1.66667	defens.
Vulnerable	-13.6667	defens.
Vulnerable	2.33333	defens.
Vulnerable	0	defens.
Vulnerable	-13.3333	defens.
Vulnerable	-1	defens.
Vulnerable	2.66667	defens.
Vulnerable	-2.33333	defens.
Vulnerable	3	defens.
Resilient	-1.33333	defens.
Resilient	3	defens.
Resilient	-1.66667	defens.
Vulnerable	4	defens.
Vulnerable	-6.33333	defens.
Resilient	2.66667	defens.
Vulnerable	-1	defens.
Vulnerable	-1	defens.
Vulnerable	-0.333333	defens.
Vulnerable	9.33333	defens.
Vulnerable	-1.33333	defens.
Vulnerable	1.33333	defens.
Resilient	-0.666667	defens.
Resilient	0	defens.
Vulnerable	-3.66667	defens.
Resilient	-18.6667	defens.
Vulnerable	-1.33333	defens.
Vulnerable	-2.33333	defens.
Resilient	-6.33333	defens.
Vulnerable	4	defens.
Vulnerable	3	defens.
Vulnerable	2	defens.
Vulnerable	-2.66667	defens.
Vulnerable	1.66667	defens.
Vulnerable	-2	defens.
Vulnerable	5.66667	defens.
Vulnerable	-3.66667	defens.
Vulnerable	-2.66667	defens.
Vulnerable	0	defens.
Vulnerable	2.66667	defens.
Resilient	3.33333	defens.
Vulnerable	-1.33333	defens.
Vulnerable	1.66667	defens.
Resilient	3.66667	defens.
Vulnerable	1.66667	defens.
Vulnerable	2.66667	defens.
Vulnerable	-3	defens.
Resilient	1.66667	defens.
Vulnerable	4.66667	defens.
Resilient	0.333333	defens.
Resilient	-1.66667	defens.
Resilient	10	defens.
Vulnerable	6	defens.
Vulnerable	0	defens.
Vulnerable	-1	defens.
Vulnerable	1.33333	defens.
Vulnerable	0.333333	defens.
Vulnerable	-0.666667	defens.
Vulnerable	2.66667	defens.
Vulnerable	6.66667	defens.
Resilient	-0.333333	defens.
Resilient	0.333333	defens.
Vulnerable	-11	defens.
Vulnerable	2.66667	defens.
Vulnerable	4.66667	defens.
Vulnerable	-3.66667	defens.
Vulnerable	-2	defens.
Vulnerable	0	defens.
Vulnerable	0.333333	defens.
Vulnerable	1	defens.
Resilient	4	defens.
Vulnerable	1.33333	defens.
Resilient	-5	defens.
Vulnerable	0.666667	defens.
Resilient	0.666667	defens.
Vulnerable	-1.66667	defens.
Vulnerable	4	defens.
Vulnerable	-2.66667	defens.
Vulnerable	0.666667	defens.
Resilient	-3.66667	defens.
Vulnerable	-1	defens.
Vulnerable	3.66667	defens.
Vulnerable	-2.33333	defens.
Vulnerable	0.333333	defens.
Vulnerable	2	defens.
Vulnerable	-3	defens.
Vulnerable	-3.33333	defens.
Vulnerable	-6.16667	defens.
Vulnerable	-4	defens.
Vulnerable	-5.33333	defens.
Vulnerable	-5.33333	defens.
Vulnerable	-4.66667	defens.
Vulnerable	6	defens.
Vulnerable	2.83333	defens.
Vulnerable	0.666667	defens.
Resilient	3.83333	defens.
Vulnerable	-0.333333	defens.
Vulnerable	-3	defens.
Vulnerable	3.66667	defens.
Vulnerable	-1.66667	defens.
Vulnerable	0.833333	defens.
Resilient	-0.333333	defens.
Resilient	-0.333333	defens.
Vulnerable	6.33333	defens.
Vulnerable	-2	defens.
Vulnerable	4.16667	defens.
Vulnerable	2	defens.
Vulnerable	1	defens.
Vulnerable	-1.5	defens.
Resilient	-0.166667	defens.
Resilient	-3.33333	defens.
Resilient	-0.166667	defens.
Vulnerable	-2.16667	defens.
Vulnerable	-3.16667	defens.
Vulnerable	0.333333	defens.
Vulnerable	-1.16667	defens.
Resilient	-4.5	defens.
Vulnerable	-3.83333	defens.
Vulnerable	-1	defens.
Vulnerable	1.33333	defens.
Vulnerable	-1.33333	defens.
Resilient	0.333333	defens.
Vulnerable	-0.833333	defens.
Resilient	-0.833333	defens.
Vulnerable	0	defens.
Vulnerable	-0.5	defens.
Vulnerable	0.333333	defens.
Vulnerable	1.16667	defens.
Vulnerable	-1	defens.
Resilient	-0.666667	defens.
Vulnerable	-4.5	defens.
Vulnerable	2.16667	defens.
Vulnerable	0.166667	defens.
Vulnerable	0.833333	defens.
Resilient	0.166667	defens.
Vulnerable	5	defens.
Vulnerable	4.33333	total
Vulnerable	8	total
Vulnerable	10	total
Vulnerable	-2	total
Vulnerable	6.66667	total
Vulnerable	-4	total
Vulnerable	5.66667	total
Vulnerable	0	total
Vulnerable	1.66667	total
Vulnerable	4	total
Vulnerable	16.3333	total
Vulnerable	-1.33333	total
Vulnerable	15	total
Vulnerable	-2.33333	total
Vulnerable	0.333333	total
Vulnerable	0.333333	total
Vulnerable	-2	total
Vulnerable	3.33333	total
Vulnerable	0	total
Vulnerable	4.33333	total
Vulnerable	-4.33333	total
Resilient	8.66667	total
Vulnerable	8.33333	total
Vulnerable	6.33333	total
Vulnerable	4.33333	total
Vulnerable	-4.33333	total
Vulnerable	2.33333	total
Vulnerable	-4.66667	total
Vulnerable	-0.666667	total
Vulnerable	4.33333	total
Vulnerable	2.66667	total
Vulnerable	-1.66667	total
Vulnerable	9.33333	total
Vulnerable	1	total
Vulnerable	11.6667	total
Vulnerable	6.33333	total
Vulnerable	-4.33333	total
Vulnerable	13	total
Vulnerable	4.33333	total
Vulnerable	5	total
Resilient	-3.66667	total
Vulnerable	-4.33333	total
Vulnerable	5	total
Vulnerable	6	total
Vulnerable	-11.3333	total
Vulnerable	9.66667	total
Vulnerable	2	total
Resilient	8.33333	total
Vulnerable	7.33333	total
Vulnerable	21.6667	total
Vulnerable	1.33333	total
Vulnerable	-0.333333	total
Vulnerable	-3.33333	total
Vulnerable	-0.333333	total
Resilient	10.3333	total
Vulnerable	8.33333	total
Vulnerable	3.66667	total
Vulnerable	3.33333	total
Vulnerable	-1.33333	total
Vulnerable	-16.6667	total
Vulnerable	-4.66667	total
Vulnerable	3	total
Vulnerable	4	total
Resilient	4.66667	total
Vulnerable	5.33333	total
Vulnerable	-3.66667	total
Vulnerable	-7.66667	total
Vulnerable	9	total
Vulnerable	12.3333	total
Vulnerable	8	total
Vulnerable	5.66667	total
Vulnerable	8.66667	total
Vulnerable	12	total
Vulnerable	6.66667	total
Vulnerable	14.6667	total
Vulnerable	3.66667	total
Vulnerable	8.33333	total
Vulnerable	6.66667	total
Vulnerable	2.33333	total
Vulnerable	1.66667	total
Resilient	10.6667	total
Resilient	8.33333	total
Resilient	8.33333	total
Resilient	4.66667	total
Vulnerable	5.66667	total
Vulnerable	7.33333	total
Vulnerable	3	total
Resilient	10.6667	total
Vulnerable	11	total
Vulnerable	0.333333	total
Vulnerable	-2.33333	total
Resilient	3.33333	total
Vulnerable	-4.16667	total
Vulnerable	5.33333	total
Vulnerable	1.33333	total
Vulnerable	-5.16667	total
Vulnerable	4	total
Vulnerable	10	total
Vulnerable	5.66667	total
Vulnerable	14	total
Vulnerable	2.33333	total
Vulnerable	3.33333	total
Resilient	-1.33333	total
Vulnerable	6.33333	total
Resilient	6.33333	total
Vulnerable	6.33333	total
Vulnerable	6.33333	total
Vulnerable	5.66667	total
Vulnerable	9	total
Resilient	7.66667	total
Resilient	5.66667	total
Vulnerable	4.33333	total
Resilient	2	total
Vulnerable	18.6667	total
Vulnerable	10.3333	total
Vulnerable	7	total
Vulnerable	-2.66667	total
Resilient	10	total
Vulnerable	11	total
Vulnerable	7.66667	total
Resilient	4	total
Vulnerable	5	total
Vulnerable	6	total
Vulnerable	2	total
Resilient	2	total
Vulnerable	7	total
Resilient	8	total
Vulnerable	6	total
Vulnerable	6	total
Vulnerable	6	total
Resilient	3.5	total
Resilient	-10	total
Vulnerable	3.5	total
Resilient	2.5	total
Vulnerable	7	total
Vulnerable	-2	total
Vulnerable	16	total
Vulnerable	8.5	total
Vulnerable	21	total
Vulnerable	10	total
Resilient	4	total
Vulnerable	7.5	total
Vulnerable	5.5	total
Vulnerable	-0.5	total
Vulnerable	-5	total
Vulnerable	0	total
Vulnerable	-8.5	total
Resilient	21.5	total
Resilient	9.5	total
Resilient	0	total
Vulnerable	2.5	total
Vulnerable	19.5	total
Resilient	1.5	total
Vulnerable	21.5	total
Resilient	9.5	total
Vulnerable	19	total
Resilient	20	total
Vulnerable	16	total
Vulnerable	19.5	total
Resilient	-2	total
Vulnerable	4.5	total
Resilient	13.5	total
Resilient	3.5	total
Resilient	8	total
Resilient	4.5	total
Vulnerable	3.5	total
Vulnerable	1	total
Resilient	7.5	total
Vulnerable	20	total
Resilient	13	total
Vulnerable	17	total
Vulnerable	9	total
Vulnerable	0	total
Vulnerable	15	total
Resilient	3	total
Vulnerable	-2	total
Vulnerable	7	total
Vulnerable	11.5	total
Vulnerable	0	total
Vulnerable	4.5	total
Vulnerable	-2	total
Resilient	6.5	total
Vulnerable	14	total
Vulnerable	-5	total
Vulnerable	-3	total
Vulnerable	11	total
Vulnerable	9	total
Vulnerable	2	total
Vulnerable	0.5	total
Vulnerable	4	total
Vulnerable	10	total
Vulnerable	4.5	total
Vulnerable	-9.5	total
Vulnerable	5.5	total
Vulnerable	0	total
Vulnerable	2.5	total
Vulnerable	-12	total
Vulnerable	-6.5	total
Vulnerable	-0.5	total
Vulnerable	-7	total
Vulnerable	1.5	total
Resilient	-8.5	total
Vulnerable	18	total
Vulnerable	1.5	total
Vulnerable	2	total
Resilient	7.5	total
Vulnerable	-0.5	total
Vulnerable	-3.5	total
Vulnerable	2	total
Vulnerable	8.5	total
Vulnerable	-9	total
Vulnerable	-5.5	total
Vulnerable	1.5	total
Vulnerable	1.5	total
Vulnerable	-6	total
Resilient	-2.5	total
Vulnerable	-2	total
Vulnerable	-1	total
Vulnerable	-3.5	total
Vulnerable	11	total
Resilient	6	total
Vulnerable	-5.5	total
Vulnerable	7	total
Vulnerable	-4.5	total
Vulnerable	-2.5	total
Resilient	-11	total
Vulnerable	2.16667	total
Vulnerable	-2.16667	total
Resilient	6	total
Vulnerable	-0.166667	total
Vulnerable	-4.66667	total
Vulnerable	6.33333	total
Vulnerable	0	total
Resilient	8	total
Vulnerable	1	total
Resilient	-2.16667	total
Vulnerable	-1.66667	total
Vulnerable	1.66667	total
Resilient	6.66667	total
Vulnerable	5.16667	total
Vulnerable	-0.166667	total
Vulnerable	0.666667	total
Vulnerable	-3.33333	total
Vulnerable	3.33333	total
Vulnerable	-1.33333	total
Vulnerable	9	total
Vulnerable	-13.1667	total
Vulnerable	-1.5	total
Vulnerable	-0.166667	total
Vulnerable	-4.5	total
Vulnerable	-4.5	total
Vulnerable	0	total
Vulnerable	-6.5	total
Vulnerable	1	total
Resilient	12.6667	total
Resilient	2.5	total
Resilient	4.83333	total
Vulnerable	3	total
Vulnerable	9.33333	total
Resilient	1.83333	total
Vulnerable	-8.16667	total
Vulnerable	7.5	total
Vulnerable	2	total
Vulnerable	10.3333	total
Vulnerable	10.6667	total
Vulnerable	2.66667	total
Resilient	-5	total
Resilient	1.83333	total
Vulnerable	-8.33333	total
Resilient	-4	total
Vulnerable	-3.33333	total
Vulnerable	-6.66667	total
Resilient	-4.66667	total
Vulnerable	17	total
Vulnerable	-0.833333	total
Vulnerable	-1.33333	total
Vulnerable	-6.33333	total
Vulnerable	-1.16667	total
Vulnerable	3.16667	total
Vulnerable	-0.666667	total
Vulnerable	-3	total
Vulnerable	-2.33333	total
Vulnerable	0.333333	total
Vulnerable	0.333333	total
Resilient	3.16667	total
Vulnerable	-3.66667	total
Vulnerable	-4	total
Resilient	-2.83333	total
Vulnerable	2.66667	total
Vulnerable	1	total
Vulnerable	-1.66667	total
Resilient	1.83333	total
Vulnerable	-0.833333	total
Resilient	1.83333	total
Resilient	-1.16667	total
Resilient	4.66667	total
Vulnerable	-0.833333	total
Vulnerable	-0.333333	total
Vulnerable	-1.66667	total
Vulnerable	-0.833333	total
Vulnerable	-1.33333	total
Vulnerable	-2.66667	total
Vulnerable	1.66667	total
Vulnerable	-2	total
Resilient	-1.83333	total
Resilient	1.83333	total
Vulnerable	-6	total
Vulnerable	1	total
Vulnerable	-2	total
Vulnerable	-2.16667	total
Vulnerable	-2.83333	total
Vulnerable	2	total
Vulnerable	-4.5	total
Vulnerable	-3.5	total
Resilient	-0.333333	total
Vulnerable	0.666667	total
Resilient	-2.33333	total
Vulnerable	0.166667	total
Resilient	0.166667	total
Vulnerable	-5.33333	total
Vulnerable	-1	total
Vulnerable	-1.33333	total
Vulnerable	-2.5	total
Resilient	-3.66667	total
Vulnerable	-3.66667	total
Vulnerable	-2.66667	total
Vulnerable	0.166667	total
Vulnerable	0	total
Vulnerable	-5	total
Vulnerable	-2.16667	total
Vulnerable	-7.33333	total
Vulnerable	-7.16667	total
Vulnerable	-1	total
Vulnerable	-4	total
Vulnerable	5.33333	total
Vulnerable	1.33333	total
Vulnerable	6.33333	total
Vulnerable	1.5	total
Vulnerable	7.5	total
Resilient	3.5	total
Vulnerable	2.5	total
Vulnerable	2.33333	total
Vulnerable	0	total
Vulnerable	1.83333	total
Vulnerable	-3.66667	total
Resilient	-2.16667	total
Resilient	-0.166667	total
Vulnerable	4.33333	total
Vulnerable	0.5	total
Vulnerable	3.66667	total
Vulnerable	1.5	total
Vulnerable	0.333333	total
Vulnerable	-2.83333	total
Resilient	-0.5	total
Resilient	1.5	total
Resilient	-0.666667	total
Vulnerable	-2.66667	total
Vulnerable	0.833333	total
Vulnerable	3.83333	total
Vulnerable	2.5	total
Resilient	-4.5	total
Vulnerable	-5.66667	total
Vulnerable	2.16667	total
Vulnerable	0	total
Vulnerable	-2	total
Resilient	-2.33333	total
Vulnerable	-0.166667	total
Resilient	-0.5	total
Vulnerable	2.16667	total
Vulnerable	0.666667	total
Vulnerable	2	total
Vulnerable	2.66667	total
Vulnerable	8	total
Resilient	12.5	total
Vulnerable	1	total
Vulnerable	9.33333	total
Vulnerable	4.16667	total
Vulnerable	6.83333	total
Resilient	-3.66667	total
Vulnerable	-0.666667	total

## Sheet: Rat info Raw data
rat	rfid	cohort	sex	group	sha_1	sha_2	sha_3	sha_4	sha_5	sha_6	sha_7	sha_8	sha_9	sha_10	sha_pr	sha_pr_breakpoint	lga_1	lga_2	lga_3	lga_4	lga_5	lga_6	lga_7	lga_8	lga_9	lga_10	lga_11	lga_12	lga_13	lga_14	lga_pr2	lga_pr2_breakpoint	lga_pr3	lga_pr3_breakpoint	shock_0.1	lga_15	shock_0.3	pre_shock	def_bsl_ave	agg_bsl_ave	total_bsl_ave	def_drug_ave	agg_drug_ave	total_drug_ave
F101	933000000000000	1	F	cocaine	1	2	1	0	0	0	0	13	19	21	10	32	91	83	89	81	130	101	82	83	105	113	117	145	162	122	13	62	11	50	29	124	26	NA	NA	NA	NA	13.3333	7.33333	20.6667
F102	933000000000000	1	F	cocaine	0	2	3	1	1	3	31	14	4	16	6	12	87	35	110	86	115	104	96	106	134	127	134	158	140	148	12	50	11	50	41	167	26	NA	NA	NA	NA	14.6667	3	17.6667
F103	933000000000000	1	F	cocaine	6	5	4	0	3	7	9	21	19	20	9	25	64	78	80	73	89	79	58	57	33	67	16	33	50	28	9	25	5	9	1	53	4	NA	NA	NA	NA	8.66667	12.6667	21.3333
F104	933000000000000	1	F	cocaine	1	2	6	7	7	25	34	32	31	31	10	32	83	78	90	81	106	105	107	113	129	132	151	136	134	130	10	32	8	25	29	150	15	NA	NA	NA	NA	2	2.33333	4.33333
F105	933000000000000	1	F	cocaine	2	2	1	0	0	0	0	1	1	0	1	1	3	3	64	16	54	25	75	10	24	68	93	104	98	41	9	25	3	6	2	105	3	NA	NA	NA	NA	9.33333	0	9.33333
F106	933000000000000	1	F	cocaine	2	1	9	0	1	1	0	2	0	2	0	0	51	72	93	114	159	111	114	121	122	227	149	162	155	140	12	50	9	32	27	206	14	NA	NA	NA	NA	13.6667	5.66667	19.3333
F107	933000000000000	1	F	cocaine	0	4	0	1	0	0	1	0	0	0	0	0	3	0	0	0	3	1	3	2	7	106	179	124.5	70	44	8	20	4	9	19	164	10	NA	NA	NA	NA	9	5.33333	14.3333
F108	933000000000000	1	F	cocaine	0	5	6	3	2	0	0	0	0	0	0	0	0	0	0	0	0	0	0	0	0	1	1	0	0	0	0	0	1	1	0	3	0	NA	NA	NA	NA	5.33333	4.66667	10
F109	933000000000000	1	F	cocaine	0	1	5	3	1	2	1	2	0	0	0	0	5	2	10	9	119	130	124	126	145	77	173	158	144	152	4	6	12	62	22	156	16	NA	NA	NA	NA	12.6667	0.333333	13
F110	933000000000000	1	F	cocaine	1	0	2	0	4	3	5	9	19	44	5	9	149	125	116	86	23	129	130	86	115	137	221	205	172	187	15	95	14	95	52	202	11	NA	NA	NA	NA	7.33333	5.33333	12.6667
F111	933000000000000	1	F	cocaine	0	0	2	3	9	27	41	42	37	38	11	40	104	102	93	124	105	96	100	97	100	117	106	120	119	118	17	145	19	268	22	134	27	NA	NA	NA	NA	10	4.66667	14.6667
F112	933000000000000	1	F	cocaine	0	1	0	0	0	0	0	2	3	2	0	0	2	1	3	3	2	3	2	6	4	5	74	116	107	110	11	40	11	50	30	114	18	NA	NA	NA	NA	10.6667	3.33333	14
F113	933000000000000	1	F	cocaine	1	1	2	0	0	1	3	0	1	0	1	1	2	2	0	0	1	4	13	92	113	96	121	110	115	120	11	40	10	40	21	125	20	NA	NA	NA	NA	10.6667	1	11.6667
F114	933000000000000	1	F	cocaine	1	2	3	0	2	0	1	1	1	0	2	2	0	0	2	1	0	3	0	3	0	6	80	154	180	144	4	6	8	25	40	158	5	NA	NA	NA	NA	12.6667	2	14.6667
F116	933000000000000	1	F	cocaine	4	2	0	0	1	4	1	0	0	2	2	2	31	88	102	117	108	90	59	62	72	86	98	115	116	121	12	50	13	77	34	136	34	NA	NA	NA	NA	18	3.33333	21.3333
F118	933000000000000	1	F	cocaine	7	9	4	37	53	44	29	36	34	40	11	40	117	106	109	65	131	128	128	123	135.5	148	162	186	160	169	14	77	12	62	29	151	11	NA	NA	NA	NA	15.6667	5.66667	21.3333
F119	933000000000000	1	F	cocaine	8	2	0	1	1	2	1	3	1	1	1	1	4	4	0	104	132	126	112	116	98	140	129	149	167	140	13	62	14	95	23	154	7	NA	NA	NA	NA	11.6667	2.33333	14
F120	933000000000000	1	F	cocaine	4	2	14	22	27	41	28	42	44	46	4	6	98	98	117	120	89	83	75	95	107	121	97	112	118	123	15	95	5	12	32	133	20	NA	NA	NA	NA	15	0.333333	15.3333
F121	933000000000000	1	F	cocaine	8	6	6	41	38	41	38	43	43	41	10	32	129	117	116	116	108	102	112	120	125	130	160	168	160	161	12	50	5	12	34	156	19	NA	NA	NA	NA	8.33333	12.6667	21
F122	933000000000000	1	F	cocaine	36	8	9	5	19	32	34	39	36	36	15	95	115	82	101	119	92	90	107	150	89	119	110	182	83	140	NA	NA	3	6	18	133	12	NA	NA	NA	NA	7.66667	5.66667	13.3333
F123	933000000000000	1	F	cocaine	3	1	2	1	0	2	0	1	0	3	2	2	2	2	3	0	2	0	1	2	3.5	5	10	5	5	9	4	6	1	2	9	40	2	NA	NA	NA	NA	6.33333	0.333333	6.66667
F126	933000000000000	1	F	cocaine	6	3	4	2	5	5	12	17	7	21	5	9	107	82	79	93	84	82	96	95	51	108	103	64	127	115	10	32	9	32	24	120	22	NA	NA	NA	NA	7.66667	0.333333	8
M101	933000000000000	1	M	cocaine	0	1	0	1	2	0	0	1	3	3	2	2	22	32	5	12	14	0	2	14	106	25	27	37	31	48	5	9	3	6	12	100	4	NA	NA	NA	NA	12.6667	2	14.6667
M102	933000000000000	1	M	cocaine	5	4	3	8	20	18	16	11	10	12	6	12	57	38	72	90	112	101	101	101	120	115	108	112	116	122	13	62	11	50	25	121	3	NA	NA	NA	NA	5	2	7
M107	933000000000000	1	M	cocaine	3	2	3	2	2	24	30	42	58	47	4	6	76	105	102	111	111	107	104	104	87	104	87	97	110	124	13	62	14	95	26	126	3	NA	NA	NA	NA	5.66667	4.66667	10.3333
M108	933000000000000	1	M	cocaine	0	0	2	3	2	1	3	2	1	0	2	2	1	3	3	2	3	4	0	1	1.5	2	0	3	0	2	0	0	0	1	0	5	1	NA	NA	NA	NA	5	6.66667	11.6667
M113	933000000000000	1	M	cocaine	6	2	4	1	0	1	3	2	0	2	4	6	2	9	9	100	111	139	104	115	130	24	46	62	88	127	4	6	10	40	22	99	1	NA	NA	NA	NA	5.66667	0.333333	6
M114	933000000000000	1	M	cocaine	2	2	4	1	0	3	4	15	0	0	0	0	0	0	0	0	0	0	0	0	0	0	0	0	0	0	0	0	0	1	12	0	7	NA	NA	NA	NA	11.3333	2.66667	14
M121	933000000000000	1	M	cocaine	19	15	39	31	35	31	38	32	34	36	4	6	98	92	98	97	108	106	106	113	103	103	106	104	106	122	15	95	17	178	24	108	13	NA	NA	NA	NA	8.33333	2.33333	10.6667
M122	933000000000000	1	M	cocaine	0	0	0	0	0	2	0	0	1	0	1	1	16	14	101	118	134	145	114	119	117	140	121	128	139	180	12	50	NA	NA	29	128	1	NA	NA	NA	NA	9	7.66667	16.6667
M127	933000000000000	1	M	cocaine	1	0	2	1	1	0	2	2	2	0	0	0	9	4	5	9	4	24	134	60	80	94	132	97	127	148	12	50	0	1	2	127	1	NA	NA	NA	NA	2	3.66667	5.66667
M128	933000000000000	1	M	cocaine	2	1	2	1	2	1	0	2	0	0	0	0	4	8	8	5	9	7	30	26	55	0	76	0	2	133	0	0	0	1	17	147	9	NA	NA	NA	NA	7.33333	5.66667	13
M131	933000000000000	1	M	cocaine	1	1	2	2	2	4	3	2	15	25	5	9	94	118	19	30	8	13	8	5	11	8	13	10	9	9	1	1	0	1	20	21	2	NA	NA	NA	NA	9	1.66667	10.6667
M134	933000000000000	1	M	cocaine	4	3	5	20	5	9	5	12	0	3	4	6	66	22	30	69	73	72	102	108	94	92	97	105	119	119	12	50	17	178	18	115	25	NA	NA	NA	NA	3.66667	3	6.66667
M150	933000000000000	1	M	cocaine	3	1	0	0	0	15	18	15	0	10	4	6	15	3	3	1	10	9	4	9	4	8	5	4	3	5	2	2	1	2	6	2	2	NA	NA	NA	NA	9.33333	3.33333	12.6667
M151	933000000000000	1	M	cocaine	1	1	4	1	2	2	3	5	7	6	5	9	32	9	3	16	30	8	27	2	5	30	20	24	10	21	8	20	7	20	3	44	6	NA	NA	NA	NA	11	2	13
M154	933000000000000	1	M	cocaine	1	0	0	1	0	2	0	3	1	3	0	0	6	5	7	7	8	5	8	2	4	4	2	7	2	3	2	2	3	6	7	8	5	NA	NA	NA	NA	4	1	5
M155	933000000000000	1	M	cocaine	4	3	3	1	5	5	5	8	5	1	2	2	5	8	9	3	46	33	9	86	34	113	117	117	117	129	11	40	13	77	18	143	1	NA	NA	NA	NA	6.66667	4.66667	11.3333
M158	933000000000000	1	M	cocaine	5	5	1	4	1	3	5	3	11	21	5	9	57	97	121	105	131	107	126	131	130	143	153	131	150	150	16	118	13	77	29	152	16	NA	NA	NA	NA	4.66667	3.66667	8.33333
M159	933000000000000	1	M	cocaine	6	1	5	4	4	2	2	2	0	3	0	0	6	1	3	3	6	20	28	65	69	89	111	107	119	128	12	50	14	95	22	131	3	NA	NA	NA	NA	8.66667	6.33333	15
M161	933000000000000	1	M	cocaine	1	0	0	2	2	2	2	1	5	0	0	0	2	6	6	6	6	53	53	118	120	133	153	152	135	143.5	9	25	13	77	24	134	26	NA	NA	NA	NA	6.66667	3.33333	10
M165	933000000000000	1	M	cocaine	5	5	0	0	2	0	1	1	3	1	1	1	4	7	24	6	41	4	11	54	94	97	128	131	170	199	11	40	6	15	29	145	2	NA	NA	NA	NA	12.6667	0.666667	13.3333
M166	933000000000000	1	M	cocaine	4	1	4	0	4	0	1	3	1	2	0	0	3	10	12	23	26	25	32	32	36	61	52	26	22	14	6	12	2	4	5	77	2	NA	NA	NA	NA	14.6667	1.33333	16
M169	933000000000000	1	M	cocaine	1	6	3	3	2	7	5	6	5	5	3	4	8	74	44	51	59	63	56	38	89	111	125	120	133	89	12	50	2	4	3	145	4	NA	NA	NA	NA	5	1.33333	6.33333
F278	933000000000000	2	F	cocaine	0	0	0	1	4	0	2	0	3	4	2	2	19	75	13	63	72	59	62	29	91	83	90	77	52	104	11	40	1	2	25	78	12	3	10	0	10	13.6667	0.666667	14.3333
F279	933000000000000	2	F	cocaine	0	0	0	0	0	0	0	1	0	2	0	0	26	64	40	109	118	121	103	102	127	113	114	114	127	136	8	20	17	178	27	112	18	28	4.33333	0	4.33333	12.3333	0	12.3333
F283	933000000000000	2	F	cocaine	0	4	1	3	2	6	16	16	13	16	5	9	47	98	73	92	100	92	98	86	89	99	101	100	104	108	17	145	16	145	24	102	13	28	3	0	3	12.6667	0.333333	13
F284	933000000000000	2	F	cocaine	2	0	1	0	0	1	0	2	2	0	1	1	7	4	6	4	5	2	37	45	45	53	60	66	73	93	6	12	1	1	2	73	21	15	9	1.33333	10.3333	8.33333	0	8.33333
F285	933000000000000	2	F	cocaine	2	0	1	0	0	1	1	3	0	4	3	4	8	15	18	66	89	72	109	129	127	118	130	129	147	145	10	50	12	62	23	119	21	28	9	7	16	17.3333	5.33333	22.6667
F286	933000000000000	2	F	cocaine	7	1	0	1	9	4	2	3	8	3	1	1	17	14	14	23	18	86	61	62	121	125	116	153	134	143	14	77	16	145	11	158	12	10	16.3333	6.66667	23	18	1	19
F287	933000000000000	2	F	cocaine	2	0	1	0	1	3	7	10	10	20	6	12	44	20	19	76	54	53	87	114	142	110	118	102	114	121	10	50	10	40	26	112	17	29	9.33333	5.66667	15	18.3333	2.33333	20.6667
F288	933000000000000	2	F	cocaine	4	15	38	42	35	35	43	51	45	37	12	50	99	98	111	106	114	108	89	97	105	105	111	111	108	112	10	50	10	40	18	82	23	23	10	8	18	13.6667	4.33333	18
F289	933000000000000	2	F	cocaine	0	0	1	25	10	31	32	43	46	43	12	50	97	116	142	149	139	124	127	140	155	117	128	135	147	143	15	95	15	118	30	127	27	45	5.66667	0	5.66667	6.33333	1	7.33333
F290	933000000000000	2	F	cocaine	8	2	5	10	32	33	49	55	52	48	14	77	135	125	146	134	146	141	134	133	151	124	141	155	140	198	16	118	19	268	27	140	21	27	17	4	21	8	17	25
F292	933000000000000	2	F	cocaine	1	1	1	4	11	5	3	1	5	6	1	1	7	2	5	72	56	19	32	70	95	85	93	67	107	113	13	62	12	62	24	105	30	21	1.33333	0	1.33333	0	0	0
F293	933000000000000	2	F	cocaine	0	0	0	1	0	0	0	0	0	4	2	2	0	0	0	1	4	9	42	33	41	47	82	108	110	113	13	62	2	4	19	98	14	26	4.66667	0.333333	5	17.3333	2.66667	20
F296	933000000000000	2	F	cocaine	3	2	1	0	1	8	5	5	8	23	4	6	90	107	127	125	141	120	149	126	104	90	100	97	91	103	14	77	12	62	25	101	8	18	5.66667	0	5.66667	2	1.33333	3.33333
F297	933000000000000	2	F	cocaine	2	2	2	2	6	7	4	19	13	41	10	32	150	168	153	178	166	150	164	170	176	150	145	143	151	147	9	25	12	62	38	138	8	35	0.333333	0	0.333333	0.333333	0.333333	0.666667
F298	933000000000000	2	F	cocaine	4	3	9	32	34	21	33	28	43	39	10	32	113	118	121	134	125	104	115	130	129	117	116	115	121	136	13	62	10	40	8	117	15	27	3	0.666667	3.66667	2.66667	1.33333	4
F299	933000000000000	2	F	cocaine	1	4	3	3	7	45	48	60	61	58	11	40	173	173	147	192	197	192	171	252	305	207	190	175	177	155	12	50	15	118	27	123	23	29	6	3.33333	9.33333	6	1.33333	7.33333
HSF100	933000000000000	2	F	cocaine	3	0	1	0	0	2	1	0	0	2	1	1	6	34	113	125	126	117	132	138	142	118	116	129	128	105	16	118	14	95	23	111	17	21	7.66667	2	9.66667	3.66667	9.33333	13
HSF101	933000000000000	2	F	cocaine	3	2	0	6	28	0	16	62	24	58	10	32	200	165	131	201	7	136	126	127	167	140	136	174	156	142	12	50	11	50	40	135	32	42	6	2	8	5.66667	2.33333	8
HSF102	933000000000000	2	F	cocaine	4	2	2	1	1	2	4	26	41	59	0	0	148	145	178	167	202	141	144	163	205	157	179	184	210	173	14	77	18	219	34	159	42	41	5	0.666667	5.66667	9	1	10
HSF103	933000000000000	2	F	cocaine	1	0	0	0	2	3	1	1	0	4	0	0	4	4	20	22	15	21	143	111	57	53	161	50	148	59	0	0	11	50	23	70	8	20	11.3333	5	16.3333	9.33333	2.66667	12
HSF104	933000000000000	2	F	cocaine	3	3	1	1	4	1	2	0	3	1	0	0	6	1	3	4	15	18	37	21	23	46	41	23	25.5	28	2	2	5	12	5	39	14	5	4	0	4	12	0.666667	12.6667
HSF105	933000000000000	2	F	cocaine	0	6	1	0	5	4	14	40	42	38	8	20	117	97	111	109	62	85	88	57	78	90	150	117	124	145	6	12	6	15	37	111	7	36	8.33333	3.66667	12	5.33333	23	28.3333
HSF106	933000000000000	2	F	naive	NA	NA	NA	NA	NA	NA	NA	NA	NA	NA	NA	NA	NA	NA	NA	NA	NA	NA	NA	NA	NA	NA	NA	NA	NA	NA	NA	NA	NA	NA	NA	NA	NA	NA	NA	NA	NA	4.33333	7.33333	8.33333
HSF107	933000000000000	2	F	naive	NA	NA	NA	NA	NA	NA	NA	NA	NA	NA	NA	NA	NA	NA	NA	NA	NA	NA	NA	NA	NA	NA	NA	NA	NA	NA	NA	NA	NA	NA	NA	NA	NA	NA	NA	NA	NA	7	0.333333	4.66667
HSF108	933000000000000	2	F	naive	NA	NA	NA	NA	NA	NA	NA	NA	NA	NA	NA	NA	NA	NA	NA	NA	NA	NA	NA	NA	NA	NA	NA	NA	NA	NA	NA	NA	NA	NA	NA	NA	NA	NA	NA	NA	NA	3.66667	0.333333	2.66667
HSF109	933000000000000	2	F	naive	NA	NA	NA	NA	NA	NA	NA	NA	NA	NA	NA	NA	NA	NA	NA	NA	NA	NA	NA	NA	NA	NA	NA	NA	NA	NA	NA	NA	NA	NA	NA	NA	NA	NA	NA	NA	NA	7.33333	0	4.5
HSF79-1	933000000000000	2	F	naive	NA	NA	NA	NA	NA	NA	NA	NA	NA	NA	NA	NA	NA	NA	NA	NA	NA	NA	NA	NA	NA	NA	NA	NA	NA	NA	NA	NA	NA	NA	NA	NA	NA	NA	NA	NA	NA	8	0	5.5
HSF80	933000000000000	2	F	naive	NA	NA	NA	NA	NA	NA	NA	NA	NA	NA	NA	NA	NA	NA	NA	NA	NA	NA	NA	NA	NA	NA	NA	NA	NA	NA	NA	NA	NA	NA	NA	NA	NA	NA	NA	NA	NA	6.33333	2.33333	5.83333
HSM153	933000000000000	2	M	cocaine	2	0	1	1	1	1	0	2	1	2	1	1	5	4	3	4	3	12	17	71	105	102	106	121	117	149	11	40	8	25	21	120	6	26	2.66667	1	3.66667	10.6667	1.33333	12
HSM154	933000000000000	2	M	cocaine	2	1	1	1	5	1	0	1	1	2	1	1	16	55	77	112	115	109	97	122	135	115	124	135	129	145	11	40	11	50	23	106	16	9	3.66667	0	3.66667	10	0	10
HSM155	933000000000000	2	M	cocaine	0	1	0	0	0	0	2	0	0	4	1	1	24	44	31	95	73	59	82	88	92	79	86	94	92	90	12	50	12	62	18	92	5	20	0.666667	4	4.66667	8	1	9
HSM156	933000000000000	2	M	cocaine	1	2	0	0	0	2	4	2	6	3	2	2	9	11	21	11	15	19	12	14	66	48	41	72	59	115	1	1	11	50	16	107	1	8	3.33333	2	5.33333	1	0	1
HSM160	933000000000000	2	M	cocaine	3	7	5	2	5	4	2	3	59	90	10	32	90	88	87	106	101	82	90	95	111	88	95	99	96	117	16	118	18	219	18	89	11	17	2	1.33333	3.33333	5.33333	0.333333	5.66667
HSM161	933000000000000	2	M	cocaine	4	1	0	0	2	1	0	0	0	1	0	0	0	0	0	2	3	2	8	79	56	83	118	97	105	117	15	95	16	145	18	133	0	23	10.3333	6	16.3333	10.6667	1	11.6667
HSM162	933000000000000	2	M	cocaine	3	0	3	6	6	3	3	2	3	4	2	2	28	44	58	55	64	80	90	97	109	101	111	105	102	101	11	40	12	62	18	101	3	20	6	7.33333	13.3333	6.66667	6	12.6667
HSM163	933000000000000	2	M	cocaine	4	4	3	5	5	4	2	6	2	18	2	2	121	92	112	116	134	108	108	116	115	96	86	105	102	88	0	0	10	40	16	87	2	17	5.66667	3	8.66667	6	7	13
HSM164	933000000000000	2	M	cocaine	4	0	1	0	1	0	0	0	0	0	0	0	0	1	1	1	1	2	0	2	2	77	43	93	197	183	13	62	12	62	24	170	12	2	8.33333	3.33333	11.6667	8.66667	5.66667	14.3333
HSM165	933000000000000	2	M	cocaine	7	3	5	15	16	20	14	10	18	28	5	9	16	22	0	0	0	0	0	18	100	94	86	71	47	121	7	15	0	1	19	92	4	24	11	5.66667	16.6667	10.3333	4.66667	15
HSM166	933000000000000	2	M	cocaine	2	1	1	0	0	1	1	1	1	1	0	0	2	2	2	3	4	1	4	3	9	6	4	69	87	90	12	50	0	1	26	111	11	58	5.66667	11	16.6667	8	18	26
HSM167	933000000000000	2	M	cocaine	8	3	3	3	2	7	26	33	41	46	9	25	158	157	162	162	172	159	156	163	191	144	161	152	122	142	9	25	3	6	26	136	4	24	4	3.66667	7.66667	NA	NA	NA
HSM168	933000000000000	2	M	cocaine	1	2	2	0	1	0	0	0	0	3	2	2	8	15	23	50	51	56	98	77	108	114	128	144	163	164	11	40	13	77	27	120	10	26	2.33333	0.666667	3	2.33333	1.66667	4
HSM169	933000000000000	2	M	cocaine	4	2	3	2	3	4	6	10	30	33	9	25	121	148	134	138	145	91	135	144	144	137	147	151	155	156	3	4	15	118	31	133	1	31	9	5	14	4.33333	21.3333	25.6667
HSM170	933000000000000	2	M	cocaine	3	3	5	8	9	7	31	21	47	18	6	12	46	38	116	136	146	123	129	135	138	128	137	144	145	159	12	50	12	62	24	153	17	29	4.66667	0	4.66667	9.33333	1.66667	11
HSM171	933000000000000	2	M	cocaine	9	13	8	2	1	8	1	7	50	47	8	20	136	166	165	149	163	149	163	185	179	151	174	177.5	181	159	9	25	14	95	30	106	19	28	5.33333	4	9.33333	1	4	5
HSM172	933000000000000	2	M	cocaine	4	3	4	9	5	10	15	15	9	11	3	4	63	92	76	122	102	96	107	123	123	115	134	142	126	143	NA	NA	9	32	23	114	7	27	1.33333	0	1.33333	3.66667	10.6667	14.3333
HSM173	933000000000000	2	M	cocaine	9	8	6	11	15	14	21	16	20	21	6	12	77	99	98	107	114	102	110	113	119	107	122	133	140	138	12	50	15	118	16	97	8	22	11.3333	3	14.3333	11.6667	7	18.6667
HSM174	933000000000000	2	M	cocaine	8	6	8	6	8	7	1	3	2	3	1	1	14	8	19	101	136	107	110.5	114	127	105	108	120	119	142	12	50	13	77	26	106	22	26	7.66667	3	10.6667	NA	NA	NA
HSM175	933000000000000	2	M	cocaine	0	2	1	0	3	2	3	2	4	7	3	4	31	32	11	48	30	46	67	62	114	86	99	103	65	107	11	40	1	2	26	0	2	21	5.33333	14.3333	19.6667	4.33333	20.3333	24.6667
HSM177	933000000000000	2	M	cocaine	3	2	1	1	2	0	0	0	0	0	0	0	4	0	0	0	0	1	0	1	0	0	0	0	0	0	1	1	14	95	2	88	0	1	9	11	20	10	6.33333	16.3333
M156-1	NA	2	M	naive	NA	NA	NA	NA	NA	NA	NA	NA	NA	NA	NA	NA	NA	NA	NA	NA	NA	NA	NA	NA	NA	NA	NA	NA	NA	NA	NA	NA	NA	NA	NA	NA	NA	NA	NA	NA	NA	7.33333	0	5.33333
M157	NA	2	M	naive	NA	NA	NA	NA	NA	NA	NA	NA	NA	NA	NA	NA	NA	NA	NA	NA	NA	NA	NA	NA	NA	NA	NA	NA	NA	NA	NA	NA	NA	NA	NA	NA	NA	NA	NA	NA	NA	17	0	10.6667
M179	NA	2	M	naive	NA	NA	NA	NA	NA	NA	NA	NA	NA	NA	NA	NA	NA	NA	NA	NA	NA	NA	NA	NA	NA	NA	NA	NA	NA	NA	NA	NA	NA	NA	NA	NA	NA	NA	NA	NA	NA	4	0.333333	3.33333
M180	NA	2	M	naive	NA	NA	NA	NA	NA	NA	NA	NA	NA	NA	NA	NA	NA	NA	NA	NA	NA	NA	NA	NA	NA	NA	NA	NA	NA	NA	NA	NA	NA	NA	NA	NA	NA	NA	NA	NA	NA	4.66667	0	3.5
M181	NA	2	M	naive	NA	NA	NA	NA	NA	NA	NA	NA	NA	NA	NA	NA	NA	NA	NA	NA	NA	NA	NA	NA	NA	NA	NA	NA	NA	NA	NA	NA	NA	NA	NA	NA	NA	NA	NA	NA	NA	6.33333	5.33333	7.66667
M182	NA	2	M	naive	NA	NA	NA	NA	NA	NA	NA	NA	NA	NA	NA	NA	NA	NA	NA	NA	NA	NA	NA	NA	NA	NA	NA	NA	NA	NA	NA	NA	NA	NA	NA	NA	NA	NA	NA	NA	NA	2	0.666667	1.83333
M183	NA	2	M	naive	NA	NA	NA	NA	NA	NA	NA	NA	NA	NA	NA	NA	NA	NA	NA	NA	NA	NA	NA	NA	NA	NA	NA	NA	NA	NA	NA	NA	NA	NA	NA	NA	NA	NA	NA	NA	NA	2	1	2
F301	933000000000000	3	F	cocaine	8	2	3	5	8	10	17	21	18	8	5	9	70	50	57	87	14	69	82	80	98	93	99	92	88	100	15	95	11	50	21	106	14	17	14	4	18	11.6667	2	13.6667
F302	933000000000000	3	F	cocaine	6	7	2	6	2	8	5	10	21	18	7	15	90	59	79	87	53	90	100	60	123	109	103	121	116.5	112	11	40	10	40	12	137	6	21	8.66667	2	10.6667	14.6667	1	15.6667
F303	933000000000000	3	F	cocaine	24	5	6	10	12	3	5	3	8	9	0	0	85	69	56	101	71	113	42	128	119	105	117	107	99	129	10	32	12	62	22	131	0	22	7.33333	6	13.3333	15	4.33333	19.3333
F304	933000000000000	3	F	cocaine	53	33	27	24	27	20	24	26	25	30	9	25	103	104	108	112	115	129	135	177	137	140	158	155	152	130	12	50	10	40	25	129	20	24	16.3333	3.33333	19.6667	6	2.33333	8.33333
F305	933000000000000	3	F	cocaine	23	25	12	11	6	2	10	2	7	14	6	12	47	66	64	105	104	122	112	129	130	122	128	155	143	143	11	40	9	32	30	123	21	29	5.33333	1	6.33333	13	3	16
F306	933000000000000	3	F	cocaine	23	11	3	6	4	4	5	2	1	4	6	12	51	100	36	80	34	94	72	85	56	36	65	98	110	93	17	145	18	219	31	143	11	24	9	1.66667	10.6667	10.3333	2.33333	12.6667
F307	933000000000000	3	F	cocaine	12	6	4	4	4	5	8	14	15	14	15	95	56	43	36	44	43	42	41	49	43	40	45	47	48	32	16	118	13	77	11	51	8	9	14.6667	3.66667	18.3333	25.3333	1.33333	26.6667
F308	933000000000000	3	F	cocaine	19	8	7	11	2	2	4	10	11	10	7	15	34	60	51	67	71	70	77	70	73	47	64	94	51	83	5	9	10	40	12	72	17	16	12.3333	3.66667	16	22	1.33333	23.3333
F309	933000000000000	3	F	cocaine	4	27	9	25	11	23	25	23	27	20	10	32	92	99	92	96	99	101	103	138	103	121	135	143	129	120	12	50	13	77	23	151	23	23	4.33333	2	6.33333	14	14	28
F310	933000000000000	3	F	cocaine	2	4	0	0	0	31	26	24	25	21	11	40	84	80	83	79	91	82	82	94	86	77	92	92	105	100	13	62	14	95	25	93	14	21	11.6667	0	11.6667	11.6667	1.33333	13
F311	933000000000000	3	F	cocaine	2	5	0	0	2	4	0	5	1	4	1	1	50	94	89	99	87	95	102	123	104	109	109	127	142	117	13	62	13	77	27	110	16	18	23	0	23	9.66667	13	22.6667
F312	933000000000000	3	F	cocaine	4	0	1	0	1	0	0	0	0	1	2	2	22	50	43	79	113	113	118	128	123	106	143	147	147	171	10	32	11	50	26	171	4	30	10.3333	3	13.3333	7	3	10
F313	933000000000000	3	F	cocaine	4	0	0	2	3	29	26	26	30	31	10	32	67	76	78	83	78	90	99	102	107	95	106	111	106	104	12	50	13	77	22	103	19	22	6.66667	0	6.66667	3.33333	3	6.33333
F314	933000000000000	3	F	cocaine	1	1	1	0	0	0	0	0	0	0	0	0	0	1	0	0	0	1	0	0	1	0	1	0	2	0	1	1	0	1	2	3	12	3	5.33333	0	5.33333	15.6667	0	15.6667
F315	933000000000000	3	F	cocaine	4	5	1	6	22	51	31	31	38	42	7	15	131	136	136	123	104	134	133	171	129	138	167	162	74	141	10	32	8	25	13	167	11	11	1	0.333333	1.33333	9	0.666667	9.66667
F316	933000000000000	3	F	cocaine	2	1	2	2	0	0	0	0	0	1	0	0	0	1	1	42	16	30	107	109	112	114	129	134	108	111	8	20	10	40	25	125	9	26	8.33333	0.333333	8.66667	8	4.33333	12.3333
F317	933000000000000	3	F	cocaine	1	2	1	1	1	3	1	0	1	0	2	2	0	3	4	5	6	5	1	63	38	61	64	66	53	35	1	1	11	50	3	131	7	1	7	1.66667	8.66667	10	2	12
F318	933000000000000	3	F	cocaine	5	8	7	23	13	64	26	31	26	19	10	32	149	109	153	194	135	132	146	149	136	125	139	168	148	136	13	62	11	50	34	138	20	27	9.66667	6	15.6667	11	3.33333	14.3333
F319	933000000000000	3	F	cocaine	1	2	2	3	2	5	36	51	35	39	8	20	164	145	141	146	134	148	173	171	198	148	179	85	189	148	4	6	14	95	36	174	17	21	20.3333	2.33333	22.6667	6	0	6
F320	933000000000000	3	F	cocaine	3	2	0	0	1	3	16	9	63	55	9	25	152	123	134	134	121	130	125	159	149	142	150	147	128	167	12	50	11	50	24	126	22	27	7.33333	0.666667	8	2.66667	0.666667	3.33333
F321	933000000000000	3	F	cocaine	1	1	1	0	0	0	1	0	0	1	0	0	1	4	1	1	4	3	1	5	4	4	24	117	115	112	11	40	15	118	26	137	31	25	1.33333	0	1.33333	2.66667	1.66667	4.33333
F322	933000000000000	3	F	cocaine	3	1	2	0	0	0	0	1	1	0	0	0	5	29	91	149	115	125	82	97	119	117	138	142	180	163	14	77	12	62	29	124	27	23	9	1.66667	10.6667	13	1.66667	14.6667
F323	933000000000000	3	F	cocaine	2	1	0	1	1	2	3	7	7	2	3	4	41	32	19	48	61	39	17	18	35	28	24	32	15	26	7	15	9	32	26	37	9	8	14.3333	0	14.3333	19	0	19
F324	NA	3	F	naive	NA	NA	NA	NA	NA	NA	NA	NA	NA	NA	NA	NA	NA	NA	NA	NA	NA	NA	NA	NA	NA	NA	NA	NA	NA	NA	NA	NA	NA	NA	NA	NA	NA	NA	3.5	3	5.33333	4	0	2.5
F325	NA	3	F	naive	NA	NA	NA	NA	NA	NA	NA	NA	NA	NA	NA	NA	NA	NA	NA	NA	NA	NA	NA	NA	NA	NA	NA	NA	NA	NA	NA	NA	NA	NA	NA	NA	NA	NA	11.5	1.66667	11.8333	7.66667	0	5.16667
F326	NA	3	F	naive	NA	NA	NA	NA	NA	NA	NA	NA	NA	NA	NA	NA	NA	NA	NA	NA	NA	NA	NA	NA	NA	NA	NA	NA	NA	NA	NA	NA	NA	NA	NA	NA	NA	NA	9.5	2	10.3333	0.666667	0	0.333333
F327	NA	3	F	naive	NA	NA	NA	NA	NA	NA	NA	NA	NA	NA	NA	NA	NA	NA	NA	NA	NA	NA	NA	NA	NA	NA	NA	NA	NA	NA	NA	NA	NA	NA	NA	NA	NA	NA	12	1	10	13.6667	1	10.3333
F328	NA	3	F	naive	NA	NA	NA	NA	NA	NA	NA	NA	NA	NA	NA	NA	NA	NA	NA	NA	NA	NA	NA	NA	NA	NA	NA	NA	NA	NA	NA	NA	NA	NA	NA	NA	NA	NA	7	1.33333	6.33333	9	0	6.66667
F329	NA	3	F	naive	NA	NA	NA	NA	NA	NA	NA	NA	NA	NA	NA	NA	NA	NA	NA	NA	NA	NA	NA	NA	NA	NA	NA	NA	NA	NA	NA	NA	NA	NA	NA	NA	NA	NA	4.5	0	3.66667	4	0.333333	3.16667
F330	NA	3	F	naive	NA	NA	NA	NA	NA	NA	NA	NA	NA	NA	NA	NA	NA	NA	NA	NA	NA	NA	NA	NA	NA	NA	NA	NA	NA	NA	NA	NA	NA	NA	NA	NA	NA	NA	6.5	3	8.33333	2.66667	1	2.5
M351	933000000000000	3	M	cocaine	10	4	5	1	2	1	2	1	1	3	0	0	42	87	126	137	161	138	144	164	137	133	154	138	121	132	10	32	14	95	19	133	2	27	8.66667	1	9.66667	15	0	15
M352	933000000000000	3	M	cocaine	5	4	2	4	1	8	9	3	10	19	6	12	68	54	80	85	89	92	101	101	104	95	98	100	111	102	11	40	10	40	20	104	2	18	8.33333	5	13.3333	9.33333	0.333333	9.66667
M353	933000000000000	3	M	cocaine	4	2	2	3	6	4	29	5	27	10	6	12	48	49	61	96	105	110	117	118	113	105	104	125	107	103	13	62	15	118	31	138	5	26	12	12.3333	24.3333	10.3333	6.33333	16.6667
M354	933000000000000	3	M	cocaine	4	3	1	2	4	1	4	7	6	12	4	6	35	31	31	55	54	76	86	75	99	75	83	79	79	92	0	0	11	50	16	32	0	14	8.33333	2	10.3333	17	2.33333	19.3333
M355	933000000000000	3	M	cocaine	4	0	2	2	0	0	2	2	0	0	0	0	0	2	3	3	3	12	49	89	109	87	104	102	44	109	9	25	8	25	1	101	1	0	4.33333	0.666667	5	10.3333	7	17.3333
M356	933000000000000	3	M	cocaine	0	1	0	0	1	1	3	5	2	1	2	2	13	10	23	57	50	92	110	92	132	61	19	60	80.5	101	1	1	6	15	16	66	1	15	8.66667	1	9.66667	11.3333	6.33333	17.6667
M357	933000000000000	3	M	cocaine	66	43	49	35	36	42	41	42	45	50	10	32	141	163	170	153	140	131	134	150	143	133	140	152	160	137	11	40	13	77	27	150	21	23	10.3333	2.66667	13	10.6667	8	18.6667
M358	933000000000000	3	M	cocaine	3	2	2	0	2	1	0	2	3	1	1	1	8	9	9	14	30	11	21	60	89	92	83	51	49	92	0	0	12	62	0	83	0	0	8.66667	4.33333	13	16	5.66667	21.6667
M359	933000000000000	3	M	cocaine	1	0	1	1	2	2	1	2	1	1	2	2	7	7	27	30	97	76	121	131	52	127	120	103	109	117	0	0	13	77	23	119	13	20	8.33333	2	10.3333	10.6667	11.6667	22.3333
M361	933000000000000	3	M	cocaine	5	2	2	2	1	7	6	10	4	9	4	6	86	87	80	102	114	129	119	128	116	123	113	110	123	135	9	25	14	95	28	153	16	24	9.33333	1.33333	10.6667	12.3333	5	17.3333
M362	933000000000000	3	M	cocaine	2	2	3	3	1	4	1	1	0	4	1	1	15	20	21	17	65	65	50	35	47	44	58	41	78	55	3	4	4	9	13	32	2	13	6	1.66667	7.66667	16	6.33333	22.3333
M363	933000000000000	3	M	cocaine	15	3	7	16	21	23	26	27	27	24	9	25	99	115	122	125	108	103	110	93	98	92	108	104	109	110	15	95	12	62	21	112	4	20	10	9.66667	19.6667	13	10.3333	23.3333
M364	933000000000000	3	M	cocaine	7	6	15	16	17	27	29	28	30	38	10	32	119	65	125	122	113	109	122	107	111	103	115	109	108.5	108	8	20	5	12	17	113	4	14	7.66667	7.33333	15	10.6667	12.6667	23.3333
M365	933000000000000	3	M	cocaine	0	0	4	0	2	4	2	1	0	0	1	1	2	17	41	51	32	29	31	108	92	99	102	105	103	98	10	32	11	50	24	102	15	27	5.66667	2	7.66667	9	5.33333	14.3333
M366	933000000000000	3	M	cocaine	5	2	3	0	2	3	2	1	1	4	0	0	13	25	37	29	73	56	105	98	123	106	98	113	120	103	13	62	13	77	27	120	22	20	6	1.66667	7.66667	8.66667	1.33333	10
M367	933000000000000	3	M	cocaine	3	3	2	4	0	4	3	3	8	8	5	9	126	108	114	128	138	141	144	145	162	146	155	147	170	148	14	77	12	62	33	153	22	32	6	0.333333	6.33333	4.66667	3.33333	8
M368	933000000000000	3	M	cocaine	2	3	1	0	0	2	2	3	2	2	2	2	14	7	9	9	8	6	6	3	9	7	10	7	13	15	2	2	5	12	4	24	2	2	9.66667	0	9.66667	12	8.33333	20.3333
M369	933000000000000	3	M	cocaine	4	2	4	1	0	1	2	2	1	3	1	1	28	6	7	6	9	8	4	11	42	17	35	47	17	30	1	1	5	12	4	14	5	2	8	4	12	13	7.33333	20.3333
M370	933000000000000	3	M	cocaine	2	1	1	0	0	0	0	0	0	0	0	0	0	0	1	2	0	2	0	0	0	0	0	0	1	0	0	0	0	1	0	0	1	0	5.33333	6.33333	11.6667	10	10	20
M371	933000000000000	3	M	cocaine	1	1	0	0	0	0	1	0	0	0	0	0	1	1	0	0	0	0	0	0	0	0	0	0	5	0	0	0	6	15	3	18	4	3	5.33333	4	9.33333	8.33333	5.66667	14
M373	933000000000000	3	M	cocaine	3	1	2	3	4	3	3	2	4	4	3	4	57	4	66	63	75	62	64	47	71	65	94	122	140	142	9	25	9	32	21	131	21	20	4.66667	4	8.66667	13.3333	1	14.3333
M374	NA	3	M	naive	NA	NA	NA	NA	NA	NA	NA	NA	NA	NA	NA	NA	NA	NA	NA	NA	NA	NA	NA	NA	NA	NA	NA	NA	NA	NA	NA	NA	NA	NA	NA	NA	NA	NA	6	0.333333	4.83333	1	0	0.666667
M375	NA	3	M	naive	NA	NA	NA	NA	NA	NA	NA	NA	NA	NA	NA	NA	NA	NA	NA	NA	NA	NA	NA	NA	NA	NA	NA	NA	NA	NA	NA	NA	NA	NA	NA	NA	NA	NA	7	1	6.83333	0	0	0
M376	NA	3	M	naive	NA	NA	NA	NA	NA	NA	NA	NA	NA	NA	NA	NA	NA	NA	NA	NA	NA	NA	NA	NA	NA	NA	NA	NA	NA	NA	NA	NA	NA	NA	NA	NA	NA	NA	10.5	3.66667	11	0.333333	0	0.166667
M377	NA	3	M	naive	NA	NA	NA	NA	NA	NA	NA	NA	NA	NA	NA	NA	NA	NA	NA	NA	NA	NA	NA	NA	NA	NA	NA	NA	NA	NA	NA	NA	NA	NA	NA	NA	NA	NA	7	1.66667	7	0	0	0
M378	NA	3	M	naive	NA	NA	NA	NA	NA	NA	NA	NA	NA	NA	NA	NA	NA	NA	NA	NA	NA	NA	NA	NA	NA	NA	NA	NA	NA	NA	NA	NA	NA	NA	NA	NA	NA	NA	1	1.33333	1.66667	5.33333	0.666667	4.33333
M379	NA	3	M	naive	NA	NA	NA	NA	NA	NA	NA	NA	NA	NA	NA	NA	NA	NA	NA	NA	NA	NA	NA	NA	NA	NA	NA	NA	NA	NA	NA	NA	NA	NA	NA	NA	NA	NA	4	0	2.83333	13.6667	0	9.66667
M380	NA	3	M	naive	NA	NA	NA	NA	NA	NA	NA	NA	NA	NA	NA	NA	NA	NA	NA	NA	NA	NA	NA	NA	NA	NA	NA	NA	NA	NA	NA	NA	NA	NA	NA	NA	NA	NA	11	0	9.16667	6	1.33333	5
F401	933000000000000	4	F	cocaine	5	2	6	8	11	15	14	5	10	6	4	9	80	86	108	125	100	126	119	124	125	131	121	125	107	152	12	50	13	77	27	134	21	27	8	2	10	15	2.33333	17.3333
F403	933000000000000	4	F	cocaine	1	2	0	0	0	0	2	4	1	0	0	0	51	44	51	30	40	91	110	118	119	109	115	128	131	125	14	77	12	62	21	127	23	26	9.66667	2.66667	12.3333	15	0.333333	15.3333
F405	933000000000000	4	F	cocaine	1	0	0	0	0	0	0	1	0	0	0	0	1	0	0	0	0	0	0	0	1	1	1	0	0	0	0	0	0	1	0	1	0	0	0.666667	3.33333	4	11.6667	3	14.6667
F406	933000000000000	4	F	cocaine	2	6	16	31	22	41	44	60	54	53	7	15	118	112	125	125	127	119	118	129	129	131	122	131	137	134	12	50	8	25	30	141	21	31	6.66667	2.33333	9	10.3333	9.33333	20
F408	933000000000000	4	F	cocaine	0	1	0	1	3	6	6	7	56	5	3	4	102	90	108	120	115	121	125	139	132	137	131	138	142	154	10	32	10	40	31	146	26	38	7.33333	2.33333	10	6.66667	3.66667	10.3333
F409	933000000000000	4	F	cocaine	31	36	41	37	2	6	15	41	60	48	13	62	122	119	113	117	133	114	129	128	127	123	125	140	141	153	12	50	12	62	32	149	27	33	6.66667	1.33333	10	5.33333	2.33333	7.66667
F410	933000000000000	4	F	cocaine	2	1	0	2	4	2	1	2	0	0	1	1	6	1	2	1	2	1	2	0	0	7	8	12	1	15	2	2	16	145	18	85	14	17	4.66667	0.333333	12.3333	11	4.66667	15.6667
F411	933000000000000	4	F	cocaine	3	4	11	6	2	23	19	36	29	34	7	15	120	134	130	125	122	120	128	144	142	134	128	146	132	152	16	118	20	328	32	137	22	34	4.66667	0	4.5	0.333333	0	0.333333
F412	933000000000000	4	F	cocaine	1	0	0	2	1	5	4	5	62	32	6	12	111	102	118	120	126	120	124	119	119	124	127	131	127	120	14	77	12	62	34	131	10	36	2	1.33333	4	3.66667	5.66667	9.33333
F413	933000000000000	4	F	cocaine	1	2	0	0	0	1	1	0	0	0	0	0	1	0	0	0	1	1	1	1	0	1	2	37	75	123	9	25	8	25	25	106	9	23	7.66667	1.33333	9	11.3333	1.33333	10.3333
F415	933000000000000	4	F	cocaine	2	1	0	0	1	1	2	2	3	2	1	1	53	106	103	104	110	104	115	114	126	124	114	130	129	141	14	77	13	77	30	50	24	35	4	0	5	8.33333	0.666667	9
F416	933000000000000	4	F	cocaine	0	0	0	0	0	0	0	0	0	0	0	0	3	0	0	3	1	94	59	70	83	75	67	82	86	86	12	50	13	77	24	90	20	21	6.33333	0	5.33333	15	0.333333	15.3333
F417	933000000000000	4	F	cocaine	4	1	0	0	0	0	0	1	0	0	1	1	7	1	88	119	128	89	90	97	94	104	27	18	106	98	10	32	12	62	0	98	9	0	12.6667	1.66667	11	11.3333	5.33333	16.6667
F419	933000000000000	4	F	cocaine	5	2	0	2	4	25	5	5	24	23	6	12	31	38	65	59	77	104	97	79	120	117	111	134	120	126	12	50	12	62	27	129	4	28	5.33333	0.333333	4.66667	17.3333	1.33333	18.6667
F421	933000000000000	4	F	cocaine	2	0	5	3	42	47	34	41	38	38	6	12	111	121	130	122	117	184	151	157	154	159	136	156	173	186	11	40	11	50	37	179	26	35	6	1.66667	11.3333	10.3333	3.33333	13.6667
F422	933000000000000	4	F	cocaine	0	0	4	2	3	10	29	7	20	4	6	12	70	105	81	163	185	178	111	61	147	93	111	133	130	130	5	9	0	1	24	139	25	32	4.66667	0.333333	4.33333	7.66667	0	7.66667
F423	933000000000000	4	F	cocaine	26	22	9	13	10	2	16	3	1	1	1	1	12	48	29	21	10	3	53	17	41	26	68	20	40	13	13	62	5	12	29	62	25	27	4.33333	1.33333	6.66667	3.33333	2	5.33333
F424	933000000000000	4	F	cocaine	2	6	13	2	1	23	24	36	42	38	10	32	114	114	111	107	96	112	126	125	128	118	118	124	127	134	16	118	14	95	29	126	26	27	18.6667	1.33333	20	11.3333	10	14.8333
F425	NA	4	F	naive	NA	NA	NA	NA	NA	NA	NA	NA	NA	NA	NA	NA	NA	NA	NA	NA	NA	NA	NA	NA	NA	NA	NA	NA	NA	NA	NA	NA	NA	NA	NA	NA	NA	NA	16.5	2.66667	14.5	NA	NA	NA
F426	NA	4	F	naive	NA	NA	NA	NA	NA	NA	NA	NA	NA	NA	NA	NA	NA	NA	NA	NA	NA	NA	NA	NA	NA	NA	NA	NA	NA	NA	NA	NA	NA	NA	NA	NA	NA	NA	7.5	2	7.66667	NA	NA	NA
F427	NA	4	F	naive	NA	NA	NA	NA	NA	NA	NA	NA	NA	NA	NA	NA	NA	NA	NA	NA	NA	NA	NA	NA	NA	NA	NA	NA	NA	NA	NA	NA	NA	NA	NA	NA	NA	NA	2	0	1.33333	NA	NA	NA
F428	NA	4	F	naive	NA	NA	NA	NA	NA	NA	NA	NA	NA	NA	NA	NA	NA	NA	NA	NA	NA	NA	NA	NA	NA	NA	NA	NA	NA	NA	NA	NA	NA	NA	NA	NA	NA	NA	11	4.66667	13.3333	NA	NA	NA
F429	NA	4	F	naive	NA	NA	NA	NA	NA	NA	NA	NA	NA	NA	NA	NA	NA	NA	NA	NA	NA	NA	NA	NA	NA	NA	NA	NA	NA	NA	NA	NA	NA	NA	NA	NA	NA	NA	12.5	0.666667	9.16667	NA	NA	NA
F430	NA	4	F	naive	NA	NA	NA	NA	NA	NA	NA	NA	NA	NA	NA	NA	NA	NA	NA	NA	NA	NA	NA	NA	NA	NA	NA	NA	NA	NA	NA	NA	NA	NA	NA	NA	NA	NA	6	0	4.5	NA	NA	NA
M451	933000000000000	4	M	cocaine	3	3	2	10	3	9	10	16	9	8	3	4	8	20	4	5	84	43	46	78	111	114	116	122	129	107	15	95	1	2	20	138	14	21	5.33333	0.333333	8.66667	7.33333	7.66667	15
M452	933000000000000	4	M	cocaine	4	3	0	0	0	0	0	0	0	1	1	1	4	2	1	3	2	1	2	1	0	7	0	1	0	0	0	0	0	1	2	8	1	4	5.66667	0.666667	6.33333	9.33333	3.33333	12.6667
M453	933000000000000	4	M	cocaine	0	1	1	1	0	1	1	8	25	5	3	4	51	13	105	218	165	62	137	125	158	154	117	131	133	140	11	40	10	40	23	139	8	25	4	1.66667	6.66667	6	7	13
M454	933000000000000	4	M	cocaine	53	9	2	0	1	2	3	2	7	28	4	9	93	103	96	87	83	85	87	94	87	99	85	88	87	94	9	25	9	32	18	94	15	21	2.33333	1.33333	3.66667	3.33333	6.66667	10
M455	933000000000000	4	M	cocaine	2	4	2	1	1	1	4	1	3	3	0	0	4	6	118	119	124	205	133	144.5	156	133	119	143	111	134	11	40	14	95	31	135	21	24	5.33333	2	9	8.66667	6	14.6667
M456	933000000000000	4	M	cocaine	4	13	32	24	9	13	12	15	20	26	7	15	120	149	70	143	119	179	125	60	31	114	116	113	126	141	4	6	4	9	38	123	24	29	5.66667	4.33333	8.33333	7	10.3333	17.3333
M457	933000000000000	4	M	cocaine	4	1	2	0	0	3	0	2	1	1	0	0	5	2	1	1	4	0	6	1	5	3	1	0	2	2	1	1	2	4	0	29	4	6	1.33333	0.333333	3.33333	7.33333	3.66667	11
M458	933000000000000	4	M	cocaine	1	3	3	8	5	11	7	6	12	19	3	4	19	27	16	30	16	22	26	21	7	17	10	13	10	6	6	12	3	6	12	73	20	15	2	0	3.66667	8	1.33333	9.33333
M459	933000000000000	4	M	cocaine	2	3	3	4	1	2	1	4	1	1	3	4	7	8	9	10	93	27	99	60	61	123	126	144	142	157	5	9	6	15	20	133	20	25	3.66667	2.33333	5.66667	6	4	10
M460	933000000000000	4	M	cocaine	1	1	1	1	1	4	4	5	8	14	2	2	105	77	120	103	95	103	103	99	0	0	0	1	0	0	0	0	0	1	16	72	15	18	6.33333	2.33333	7.33333	6.33333	3	9.33333
M461	933000000000000	4	M	cocaine	2	2	1	2	0	1	2	1	3	2	0	0	3	0	2	4	7	4	1	2	2	101	86	96	45	53	3	4	2	4	19	118	5	17	1.33333	0	2	7	13.6667	20.6667
M462	933000000000000	4	M	cocaine	28	12	7	17	9	3	4	2	0	3	4	6	47	65	50	76	98	106	107	103	94	107	111	116	120	126	13	62	12	62	25	120	5	21	3.33333	0.333333	4.66667	10.3333	4.66667	15
M463	933000000000000	4	M	cocaine	4	13	18	13	14	13	14	15	16	14	9	25	67	92	119	129	144	128.5	113	131	35	147	138	144	147	172	7	15	10	40	29	176	27	30	9	0.666667	9.66667	9.66667	7	16.6667
M466	933000000000000	4	M	cocaine	0	1	0	2	0	0	1	0	0	2	1	1	2	97	107	108	98	87	89	87	96	99	93	100	107	100	12	50	9	32	27	112	10	29	10.6667	0.333333	11	8.33333	0	8.33333
M467	933000000000000	4	M	cocaine	3	2	2	0	0	1	0	1	0	1	0	0	3	0	1	0	0	1	0	1	0	0	0	0	0	0	1	1	3	6	2	69	13	2	2.66667	0	2.66667	7.66667	11.3333	12.6667
M468	933000000000000	4	M	cocaine	0	2	5	3	2	3	3	7	9	8	6	12	34	62	77	45	70	117	99	125	121	133	135	142	145	148	13	62	13	77	27	157	1	29	1	2	3	10.6667	3.33333	14
M469	933000000000000	4	M	cocaine	1	2	4	3	0	5	2	1	2	2	2	2	11	16	17	16	31	37	24	45	36	87	108	121	131	140	8	20	11	50	28	147	10	28	7.33333	3	10.3333	8.66667	9.33333	18
M470	933000000000000	4	M	cocaine	6	1	3	0	NA	NA	NA	NA	NA	NA	NA	NA	4	2	3	1	1	1	1	0	1	2	0	0	1	0	2	2	0	1	6	5	2	6	10	2.66667	12.6667	13.6667	3	16.6667
M471	933000000000000	4	M	cocaine	0	0	0	0	0	1	2	1	2	4	5	9	19	41	75	51	63	130	127	106	125	152	126	136	131	167	13	62	14	95	30	123	25	36	9.33333	5.66667	15	10.3333	9.66667	20
M472	933000000000000	4	M	cocaine	3	2	3	3	2	6	1	1	0	0	1	1	1	1	3	3	6	8	6	5	11	123	23	93	101	100	11	40	13	77	13	127	9	14	#DIV/0!	#DIV/0!	#DIV/0!	5.33333	5	10.3333
M473	933000000000000	4	M	cocaine	1	2	1	0	1	3	1	1	0	2	1	1	1	6	11	40	41	52	26	92	105	116	116	64	84	64	8	20	0	1	19	116	7	10	4.33333	2.66667	7	11	2	13
M475	NA	4	M	naive	NA	NA	NA	NA	NA	NA	NA	NA	NA	NA	NA	NA	NA	NA	NA	NA	NA	NA	NA	NA	NA	NA	NA	NA	NA	NA	NA	NA	NA	NA	NA	NA	NA	NA	4	5.66667	8	NA	NA	NA
M476	NA	4	M	naive	NA	NA	NA	NA	NA	NA	NA	NA	NA	NA	NA	NA	NA	NA	NA	NA	NA	NA	NA	NA	NA	NA	NA	NA	NA	NA	NA	NA	NA	NA	NA	NA	NA	NA	#DIV/0!	#DIV/0!	#DIV/0!	NA	NA	NA
M477	NA	4	M	naive	NA	NA	NA	NA	NA	NA	NA	NA	NA	NA	NA	NA	NA	NA	NA	NA	NA	NA	NA	NA	NA	NA	NA	NA	NA	NA	NA	NA	NA	NA	NA	NA	NA	NA	0	0	0	NA	NA	NA
M478	NA	4	M	naive	NA	NA	NA	NA	NA	NA	NA	NA	NA	NA	NA	NA	NA	NA	NA	NA	NA	NA	NA	NA	NA	NA	NA	NA	NA	NA	NA	NA	NA	NA	NA	NA	NA	NA	8	0.333333	6.66667	NA	NA	NA
M479	NA	4	M	naive	NA	NA	NA	NA	NA	NA	NA	NA	NA	NA	NA	NA	NA	NA	NA	NA	NA	NA	NA	NA	NA	NA	NA	NA	NA	NA	NA	NA	NA	NA	NA	NA	NA	NA	5	3.66667	6.33333	NA	NA	NA
M480	NA	4	M	naive	NA	NA	NA	NA	NA	NA	NA	NA	NA	NA	NA	NA	NA	NA	NA	NA	NA	NA	NA	NA	NA	NA	NA	NA	NA	NA	NA	NA	NA	NA	NA	NA	NA	NA	7	4	8.83333	NA	NA	NA
F501	933000000000000	5	F	cocaine	6	5	5	4	26	39	36	45	38	50	8	20	123	77	91	137	116	119	157	150	156	185	114	122	161	133	13	62	14	95	23	131	16	34	14	0	14	15	1	16
F502	933000000000000	5	F	cocaine	1	0	0	0	0	0	0	0	0	1	1	1	7	6	7	16	23	22.75	22.5	22	17	14	12	9	17	5	1	1	1	2	0	19	0	0	18	1	19	19	2	21
F503	933000000000000	5	F	cocaine	0	3	6	3	10	32	23	26	12	19	11	40	102	112	149	131	141	115	125	118	131	144	121	153	151	163	16	118	16	145	35	125	18	38	6	0	6	5	8	13
F504	933000000000000	5	F	cocaine	5	4	4	3	7	6	4	5	2	2	2	2	46	45	34	36	22.5	9	26	26	29	28	20	14	5	16	5	9	5	12	3	61	1	26	6	0	6	13	1	14
F505	933000000000000	5	F	cocaine	1	5	14	21	22	18	20	18	11	15	9	25	75	74	77	110	117	104	110	117	117	104	107	107	117	105	11	40	8	25	29	120	35	22	5	0	5	5	6	11
F506	933000000000000	5	F	cocaine	5	6	0	25	29	37	31	32	31	33	10	32	100	110	104	108	121	108	121	121	116	122	115	109	116	115	10	32	10	40	20	124	8	19	6	5	11	8	9	17
F508	933000000000000	5	F	cocaine	24	35	40	39	33	28	35	13	34	35	14	95	102	96	96	100	104	88	96	108	97	113	98	89	95	95	10	32	11	50	26	114	24	26	3	4	7	10	3	13
F509	933000000000000	5	F	cocaine	3	1	0	0	0	0	1	1	1	0	1	1	43	26	11	15	56	42	22	50	32	36	39	42	54	31	0	0	7	20	1	46	11	16	10	1.5	11.5	11	4	15
F510	933000000000000	5	F	cocaine	4	5	0	0	1	1	3	2	0	1	1	1	6	3	6	6	10	10	10	13	9	11	10	8	7	6	0	0	3	6	1	6	2	6	13.5	4.5	18	4	4	8
F511	933000000000000	5	F	cocaine	2	2	6	8	56	27	32	34.5	37	36	10	32	106	88	97	99	105	94	97	105	101	106	84	80	85	100	10	32	10	40	24	104	6	23	2.5	1	3.5	1	6	7
F512	933000000000000	5	F	cocaine	3	5	9	12	4	14	20	26	19	17	9	25	83	95	100	98	102	89	80	76	75	64	35	41.5	48	19	0	0	2	4	1	1	8	26	3	0.5	3.5	4	2	6
F514	933000000000000	5	F	cocaine	3	4	2	1	0	2	0	0	0	0	0	0	3	9	25	42	22	47.5	73	55	61	67	63	74	79	61	8	20	5	12	18	94	14	15	10	4	14	5	7	12
F518	933000000000000	5	F	cocaine	5	3	4	11	13	7	5	9	18	22	5	9	104	87	103	102	110	108	101	111	111	130	145	151	135	143	12	50	12	62	8	133	9	9	3	2	5	11	10	21
F519	933000000000000	5	F	cocaine	1	0	0	1	0	2	1	2	2	1	2	2	54	73	64	89	129	106	109	123	122	NA	19	118	118	118	13	62	9	32	21	103	6	21	6	2.5	8.5	2	15	17
F520	933000000000000	5	F	cocaine	4	0	1	0	1	0	1	2	5	1	2	2	56	52	102	95	147	144	148	145	151	156	182	173	17	95	11	40	14	95	30	198	23	32	6.5	9.5	16	14	23	37
F522	933000000000000	5	F	cocaine	1	1	2	0	0	1	2	1	1	0	0	0	3	1	3	2	6	8	5	51.5	98	128	100	109	108	108.5	NA	NA	13	77	23	117	1	20	7	0	7	5	12	17
F523	933000000000000	5	F	cocaine	2	2	2	2	4	20	10	17	14	10	8	20	51	41	38	37	40	30	18	37	30	15	20	74	14	44	4	6	12	62	10	21	14	4	3.5	8.5	12	15	1	16
F524	933000000000000	5	F	cocaine	NA	14	8.5	3	4	2	1	1	2	2	1	1	9	5	47	33	21	18	15	36	15	51	56.5	62	74	77	11	40	11	50	13	82	9	14	4	5.5	9.5	14	3	17
F526	933000000000000	5	F	cocaine	0	1	0	2	1	2	0	0	0	0	2	2	4	39	36	119	117	128	94	143	123	105	87	114	116	113	6	12	16	145	9	138	10	0	4.5	0	4.5	10	0	10
F527	933000000000000	5	F	cocaine	4	4	1	2	1	4	2	1	3	1	0	0	7	8	17	83	95	80	91	107	113	106	110	138	131	126	12	50	8	25	27	114	14	27	15	0.5	15.5	14	1	15
F528	933000000000000	5	F	cocaine	11	15	6	30	20	19	35	35	67	49	NA	NA	46	141	141	81	21	16	134	147	132	132	134	119	145	153	12	50	13	77	27	144	22	26	7	3	10	2	3	5
F529	933000000000000	5	F	cocaine	10	6	4	2	2	5	7	3	3	1	2	2	11	59	62	75	88	82	114	139	99	60	124	165	121	176	11	40	16	145	27	151	29	33	12	1	13	11	2	13
F530	933000000000000	5	F	cocaine	0	2	2	0	0	2	0	1	0	0	1	1	3	11	118	100	125	117	148	175	132	179	162	156	159	91	11	40	14	95	23	180	6	11	10	0.5	10.5	2	0	2
F532	933000000000000	5	F	cocaine	1	9	13	23	15	26	21	22	17	24	2	2	21	37	25	46	63	64	80	89	87	89	96	107	107	113	9	25	10	40	20	115	30	22	10	12	22	8	21	29
F533	NA	5	F	naive	NA	NA	NA	NA	NA	NA	NA	NA	NA	NA	NA	NA	NA	NA	NA	NA	NA	NA	NA	NA	NA	NA	NA	NA	NA	NA	NA	NA	NA	NA	NA	NA	NA	NA	NA	NA	NA	NA	NA	NA
F534	NA	5	F	naive	NA	NA	NA	NA	NA	NA	NA	NA	NA	NA	NA	NA	NA	NA	NA	NA	NA	NA	NA	NA	NA	NA	NA	NA	NA	NA	NA	NA	NA	NA	NA	NA	NA	NA	NA	NA	NA	NA	NA	NA
F535	NA	5	F	naive	NA	NA	NA	NA	NA	NA	NA	NA	NA	NA	NA	NA	NA	NA	NA	NA	NA	NA	NA	NA	NA	NA	NA	NA	NA	NA	NA	NA	NA	NA	NA	NA	NA	NA	NA	NA	NA	NA	NA	NA
F536	NA	5	F	naive	NA	NA	NA	NA	NA	NA	NA	NA	NA	NA	NA	NA	NA	NA	NA	NA	NA	NA	NA	NA	NA	NA	NA	NA	NA	NA	NA	NA	NA	NA	NA	NA	NA	NA	NA	NA	NA	NA	NA	NA
F537	NA	5	F	naive	NA	NA	NA	NA	NA	NA	NA	NA	NA	NA	NA	NA	NA	NA	NA	NA	NA	NA	NA	NA	NA	NA	NA	NA	NA	NA	NA	NA	NA	NA	NA	NA	NA	NA	NA	NA	NA	NA	NA	NA
M551	933000000000000	5	M	cocaine	22	3	1	0	1	1	0	2	3	1	0	0	24	5	1	0	0	1	3	9	3	3	7	11	17	5	1	1	9	32	4	13	8	2	5	0.5	5.5	15	12	27
M552	933000000000000	5	M	cocaine	1	0	0	0	1	1	1	0	1	2	1	1	7	7	4	3	3	1	2	1	1	4	17	3	2	1	0	0	0	1	2	52	2	3	2.5	0	2.5	7	5	12
M553	933000000000000	5	M	cocaine	0	0	0	0	0	1	0	0	0	1	0	0	0	0	0	0	1	0	0	1	0	0	1	4	2	1	0	0	6	15	0	33	0	0	12	0	12	7	5	12
M554	933000000000000	5	M	cocaine	1	0	1	1	1	0	1	1	0	0	0	0	4	5	2	1	1	3	0	1	4	71	92	71	73	48	7	15	15	118	15	121	5	19	5.5	1	6.5	9	0	9
M555	933000000000000	5	M	cocaine	0	4	0	0	0	0	0	1	1	0	1	1	32	32	3	3	56	15	29	19	6	43	10	10	85	85	11	40	9	32	33	177	0	26	2.5	0	2.5	0	22	22
M556	933000000000000	5	M	cocaine	0	2	1	1	0	1	1	0	1	0	1	1	17	9	4	14	16	10	5	5	4	3	7	8	4	71	16	118	11	50	22	86	5	22	11.5	0	11.5	8	5	13
M557	933000000000000	5	M	cocaine	3	1	4	4	0	6	2	6	8	8	4	6	31	28	39	52	75	69	70	78	74	79	86	102	92	93	7	15	9	32	16	89	7	16	2.5	1	3.5	6	19	25
M558	933000000000000	5	M	cocaine	2	2	0	1	0	2	0	1	0	0	1	1	2	6	2	4	2	1	4	1	1	1	2	3	6	2	4	6	4	9	4	9	4	7	4.5	0	4.5	5	9	14
M559	933000000000000	5	M	cocaine	2	4	1	3	2	6	5	11	13	9	7	15	46	48	50	67	86	82.5	79	83	92	84	103	98	100	100	12	50	12	62	20	119	5	23	2.5	1.5	4	1	22	23
M560	933000000000000	5	M	cocaine	2	3	2	4	1	3	2	3	3	1	1	1	7	9	6	7	6	3	2	3	2	2	3	1	4	1	1	1	2	4	4	3	4	2	0	0	0	4	16	20
M561	933000000000000	5	M	cocaine	3	0	0	0	1	22	23	25	25	11	7	15	62	62	63	82	86	72	68	64	71	80	87	83	89	91	14	77	13	77	21	104	16	22	0	0	0	4	12	16
M562	933000000000000	5	M	cocaine	3	3	15	25	26	29	28	26	26	1	12	50	100	93	60	97	108	91	90	87	91	98	110	107	105	119	12	50	13	77	16	97	3	23	2	0.5	2.5	7	15	22
M563	933000000000000	5	M	cocaine	0	0	0	0	1	1	0	0	0	0	0	0	3	0	0	1	0	0	0	0	0	0	1	0	1	1	0	0	0	0	0	0	2	0	11.5	2.5	14	11	1	12
M565	933000000000000	5	M	cocaine	5	1	1	1	1	1	2	0	1	0	0	0	0	5	27	64	81	72	72	76	78	83	83	90	86	80	8	20	12	62	18	80	15	12	4	3.5	7.5	7	5	12
M566	933000000000000	5	M	cocaine	0	2	0	2	0	0	0	0	0	0	0	0	0	0	1	0	0	2	1	1	1	0	0	1	0	1	0	0	0	0	0	0	1	3	4.5	0	4.5	8	10	18
M567	933000000000000	5	M	cocaine	1	0	0	0	0	0	2	2	1	0	1	NA	0	1	1	2	2	2	4	7	27	30	52	8	0	0	2	2	4	9	7	4	2	12	13	8.5	21.5	7	18	25
M568	933000000000000	5	M	cocaine	0	1	0	2	0	0	1	0	1	0	0	0	0	1	0	2	2	0	0	0	0	0	1	1	1	0	0	0	0	0	1	0	1	1	4	4	8	12	4	16
M569	933000000000000	5	M	cocaine	4	3	5	3	8	19	16	11	12	4	3	4	22	12	16	5	8	9	4	12	5	2	17	20	20	3	2	2	7	20	11	28	8	18	0.5	3	3.5	4	4	8
M570	933000000000000	5	M	cocaine	1	0	1	0	1	0	0	1	1	0	1	1	3	3	2	1	37	56	36	63	32	97	99	112	107	109	12	50	13	77	17	103	8	17	2	0.5	2.5	3	3	6
M571	933000000000000	5	M	cocaine	4	2	4	3	0	1	0	2	1	0	2	2	60	100	94	67	121	109	107	108	121	16	129	132	145	138	10	32	9	32	15	132	5	25	2.5	10.5	13	14	0	14
M572	933000000000000	5	M	cocaine	2	3	0	0	0	2	0	1	1	1	1	1	1	1	1	1	3	3	4	2	2	2	10	34	69	44	3	4	10	40	19	61	7	24	8.5	8	16.5	10	14	24
M573	933000000000000	5	M	cocaine	8	2	5	5	1	4	1	0	1	1	2	2	15	22	7	11	11	7	10	8	11	11	65	46	60	105	11	40	13	77	24	149	13	29	8	2	10	13	17	30
M574	933000000000000	5	M	cocaine	4	3	0	1	4	3	3	5	2	2	2	2	8	13	9	14	5	4	2	5	2	6	4	9	7	2	2	2	2	4	7	11	2	8	4	3	7	10	10	20
M575	933000000000000	5	M	cocaine	2	5	3	2	1	1	3	4	7	6	4	6	60	42	65	86	90	85	81	91	90	93	111	115	122	124	9	25	7	20	17	111	1	21	2	2	4	12	9	21
M576	933000000000000	5	M	cocaine	1	2	2	1	0	2	2	0	6	2	1	1	39	46	14	50	48	63	47	52	49	71	71	78	87	98	8	20	10	40	24	122	14	21	4	3	7	6	10	16
M577	933000000000000	5	M	cocaine	2	1	1	0	1	1	1	0	1	0	0	0	21	24	16	51	97	98	112	107	106	120	138	136	126	141	10	32	12	62	27	125	7	13	11	4	15	10	5	15
M578	933000000000000	5	M	cocaine	3	1	0	1	2	2	2	2	3	7	6	12	119	109	122	143	132	128	131	147	165	162	199	95	206	276	10	32	12	62	22	190	5	34	6	3	9	12	12	24
M579	933000000000000	5	M	cocaine	0	2	3	3	8	1	6	1	2	1	2	2	5	7	1	2	3	2	1	0	0	2	0	0	0	1	0	0	1	2	0	2	3	0	4	2	6	5	4	9
M580	933000000000000	5	M	cocaine	2	2	2	2	1	1	1	0	1	1	2	2	6	16	14	10	18	11	12	15	11	6	70	75	78	96	10	32	11	50	13	104	2	13	5	2	7	5	0	5
M581	NA	5	M	naive	NA	NA	NA	NA	NA	NA	NA	NA	NA	NA	NA	NA	NA	NA	NA	NA	NA	NA	NA	NA	NA	NA	NA	NA	NA	NA	NA	NA	NA	NA	NA	NA	NA	NA	NA	NA	NA	NA	NA	NA
M582	NA	5	M	naive	NA	NA	NA	NA	NA	NA	NA	NA	NA	NA	NA	NA	NA	NA	NA	NA	NA	NA	NA	NA	NA	NA	NA	NA	NA	NA	NA	NA	NA	NA	NA	NA	NA	NA	NA	NA	NA	NA	NA	NA
M583	NA	5	M	naive	NA	NA	NA	NA	NA	NA	NA	NA	NA	NA	NA	NA	NA	NA	NA	NA	NA	NA	NA	NA	NA	NA	NA	NA	NA	NA	NA	NA	NA	NA	NA	NA	NA	NA	NA	NA	NA	NA	NA	NA
M584	NA	5	M	naive	NA	NA	NA	NA	NA	NA	NA	NA	NA	NA	NA	NA	NA	NA	NA	NA	NA	NA	NA	NA	NA	NA	NA	NA	NA	NA	NA	NA	NA	NA	NA	NA	NA	NA	NA	NA	NA	NA	NA	NA
M585	NA	5	M	naive	NA	NA	NA	NA	NA	NA	NA	NA	NA	NA	NA	NA	NA	NA	NA	NA	NA	NA	NA	NA	NA	NA	NA	NA	NA	NA	NA	NA	NA	NA	NA	NA	NA	NA	NA	NA	NA	NA	NA	NA
M586	NA	5	M	naive	NA	NA	NA	NA	NA	NA	NA	NA	NA	NA	NA	NA	NA	NA	NA	NA	NA	NA	NA	NA	NA	NA	NA	NA	NA	NA	NA	NA	NA	NA	NA	NA	NA	NA	NA	NA	NA	NA	NA	NA
M587	NA	5	M	naive	NA	NA	NA	NA	NA	NA	NA	NA	NA	NA	NA	NA	NA	NA	NA	NA	NA	NA	NA	NA	NA	NA	NA	NA	NA	NA	NA	NA	NA	NA	NA	NA	NA	NA	NA	NA	NA	NA	NA	NA
F701	933000000000000	7	F	cocaine	NA	1	2	0	2	20	40	29	46	50	11	40	140	112	121	122	151	129	139	145	155	155	142	158	148	136	19	219	17	178	NA	141	19	36	3	2	5	10.5	1.5	12
F702	933000000000000	7	F	cocaine	NA	0	0	1	2	1	0	1	0	3	2	2	2	2	2	5	7	31	40	28	22	68	77	92	128	161	12	50	3	6	NA	154	10	30	4.5	0	4.5	10	6	16
F703	933000000000000	7	F	cocaine	NA	7	5	5	3	2	10	11	16	14	5	9	100	83	92	105	106	110	113	100	103	111	120	120	121	116	6	12	7	20	NA	103	4	24	18.5	3.5	22	6.5	15.5	22
F704	933000000000000	7	F	cocaine	NA	6	2	2	1	1	0	5	2	0	2	2	5	4	3	79	39	101	122	157	53	174	118	48	121	254	3	4	0	0	NA	208	8	9	11.5	1	12.5	14.5	2.5	17
F705	933000000000000	7	F	cocaine	NA	1	0	0	1	0	1	0	0	1	2	2	6	8	6	14	11	5	42	118	149	184	218	146	163	89	8	20	6	15	NA	95	7	20	13	10	23	4.5	16.5	21
F706	933000000000000	7	F	cocaine	NA	0	0	0	0	0	1	0	0	0	0	0	2	0	0	0	0	0	0	1	0	1	3	0	1	1	1	1	0	0	NA	0	0	0	4.5	5	9.5	4.5	11.5	16
F708	933000000000000	7	F	cocaine	NA	14	28	34	24	29	35	38	36	35	15	95	77	77	89	88	88	83	92	92	80	101	76	83	85	83	18	178	19	268	NA	79	6	6	5.5	4.5	10	3.5	20.5	24
F709	933000000000000	7	F	cocaine	NA	8	7	29	31	33	37	41	48	46	12	50	109	104	105	109	104	112	113	116	119	113	128	127	106	101	14	77	12	62	NA	100	10	24	7	6	13	3	5	8
F710	933000000000000	7	F	cocaine	NA	8	4	3	0	54	26	34	32	30	11	40	112	115	120	109	139	127	133	145	139	137	129	127	128	190	10	32	5	12	NA	82	14	33	13	7	20	13	4	17
F711	933000000000000	7	F	cocaine	NA	1	0	0	1	0	0	0	0	2	0	0	4	23	6	60	59	94	84	109	121	111	126	126	142	141	9	25	9	32	NA	21	10	30	11	5	16	7.5	19.5	27
F715	933000000000000	7	F	cocaine	NA	2	1	0	0	1	1	0	0	0	1	1	2	2	12	14	30	46	80	58	55	42	65	71	108	58	5	9	3	6	NA	64	0	11	3	5.5	8.5	5	12.5	17.5
F716	933000000000000	7	F	cocaine	NA	1	0	2	0	0	0	0	1	2	0	0	12	21	48	55	69	81	74	73	86	83	75	71	62	91	13	62	12	62	NA	81	5	5	7.5	5.5	13	9.5	5.5	15
F717	933000000000000	7	F	cocaine	NA	2	0	1	1	1	2	1	1	2	2	2	6	4	62	102	106	120	108	125	122	130	132	124	120	65	12	50	15	118	NA	127	3	24	11	3.5	14.5	2	13	15
F718	933000000000000	7	F	cocaine	NA	0	0	0	0	0	0	0	0	0	0	0	31	41	28	25	20	24	45	30	71	64	75	66	96	82	1	1	8	25	NA	72	2	25	7	3	10	9.5	4.5	14
F719	933000000000000	7	F	cocaine	NA	0	0	16	89	50	8	34	45	46	12	50	127	113	96	120	125	122	124	110	120	120	116	119	116	117	15	95	11	50	NA	112	12	37	3.5	14.5	18	1	27	28
F720	933000000000000	7	F	cocaine	NA	0	6	0	0	0	0	0	0	0	0	0	2	2	4	1	1	44	45	65	114	61	126	183	92	130	3	4	14	95	NA	81	17	51	5	8.5	13.5	7	11	18
F721	933000000000000	7	F	cocaine	NA	1	1	3	20	13	19	35	23	35	10	32	59	94	48	61	55	39	50	35	66	37	67	77	61	34	11	40	10	40	NA	75	10	26	9	11	20	5.5	5	10.5
F723	933000000000000	7	F	cocaine	NA	26	19	21	34	41	57	58	49	45	11	40	118	125	115	117	130	119	125	125	123	116	121	135	130	138	13	62	9	32	NA	112	15	25	9.5	1.5	11	8	8.5	16.5
F725	933000000000000	7	F	cocaine	NA	37	17	22	29	34	32	41	37	39	6	12	89	70	78	70	89	88	86	97	100	103	90	100	95	98	12	50	10	40	NA	97	10	28	5.5	5.5	11	2.5	11	13.5
F727	933000000000000	7	F	cocaine	NA	7	7	12	39	25	29	33	29	23	9	25	110	111	85	81	112	97	99	94	101	113	102	79	42	98	1	1	1	2	NA	94	8	23	13	3	16	3.5	0.5	4
F728	933000000000000	7	F	cocaine	NA	2	0	1	0	5	1	16	31	28	7	15	75	77	71	68	87	80	80	70	88	46	88	85	105	105	10	32	13	77	NA	102	6	33	15.5	1.5	17	4	6.5	10.5
F729	933000000000000	7	F	cocaine	NA	1	2	0	0	0	0	1	1	2	1	1	11	33	9	9	72	53	40	14	41	82	79	73	84	101	15	95	14	95	NA	80	8	25	17	5	22	5.5	16	21.5
F730	933000000000000	7	F	cocaine	NA	10	6	9	18	18	19	38	32	34	8	20	61	67	57	64	113	92	100	99	92	94	90	96	80	88	18	178	15	118	NA	80	12	24	9.5	3	12.5	3	2.5	5.5
F731	933000000000000	7	F	naive	NA	NA	NA	NA	NA	NA	NA	NA	NA	NA	NA	NA	NA	NA	NA	NA	NA	NA	NA	NA	NA	NA	NA	NA	NA	NA	NA	NA	NA	NA	NA	NA	NA	NA	13.5	4	17.5	15	1.5	12.5
F732	933000000000000	7	F	naive	NA	NA	NA	NA	NA	NA	NA	NA	NA	NA	NA	NA	NA	NA	NA	NA	NA	NA	NA	NA	NA	NA	NA	NA	NA	NA	NA	NA	NA	NA	NA	NA	NA	NA	19	3.5	22.5	15	1	11.5
F733	933000000000000	7	F	naive	NA	NA	NA	NA	NA	NA	NA	NA	NA	NA	NA	NA	NA	NA	NA	NA	NA	NA	NA	NA	NA	NA	NA	NA	NA	NA	NA	NA	NA	NA	NA	NA	NA	NA	5	8	13	11	9	14.25
F734	933000000000000	7	F	naive	NA	NA	NA	NA	NA	NA	NA	NA	NA	NA	NA	NA	NA	NA	NA	NA	NA	NA	NA	NA	NA	NA	NA	NA	NA	NA	NA	NA	NA	NA	NA	NA	NA	NA	4.5	5.5	10	10	10.5	15.5
F735	933000000000000	7	F	naive	NA	NA	NA	NA	NA	NA	NA	NA	NA	NA	NA	NA	NA	NA	NA	NA	NA	NA	NA	NA	NA	NA	NA	NA	NA	NA	NA	NA	NA	NA	NA	NA	NA	NA	9	7.5	16.5	5.5	4.5	7.5
F736	933000000000000	7	F	naive	NA	NA	NA	NA	NA	NA	NA	NA	NA	NA	NA	NA	NA	NA	NA	NA	NA	NA	NA	NA	NA	NA	NA	NA	NA	NA	NA	NA	NA	NA	NA	NA	NA	NA	7	6.5	13.5	6.5	5	9
F737	933000000000000	7	F	cocaine	NA	2	1	2	15	5	3	4	4	2	3	4	14	4	82	32	89	72	55	34	13	70	134	86	48	123	1	1	10	40	NA	45	4	4	15	12	27	8.5	18.5	27
M751	933000000000000	7	M	cocaine	NA	1	1	0	0	1	2	0	0	0	0	0	6	8	9	37	73	50	85	66	97	105	95	100	104	109	19	219	20	328	NA	115	9	7	5	21.5	26.5	3	25	28
M752	933000000000000	7	M	cocaine	NA	0	0	0	0	0	5	2	2	4	2	2	4	6	5	2	11	9	9	5	10	11	4	3	2	6	2	2	2	4	NA	5	2	4	10.5	5	15.5	5	2	7
M754	933000000000000	7	M	cocaine	NA	1	3	1	3	5	3	0	5	3	2	2	9	12	14	26	12	11	14	47	50	65	70	76	81	70	10	32	10	40	NA	80	14	18	5.5	8.5	14	1	31	32
M755	933000000000000	7	M	cocaine	NA	0	1	0	0	0	2	0	1	0	0	0	51	62	84	69	91	94	92	95	94	88	87	90	93	80	13	62	15	118	NA	114	11	34	4.5	8	12.5	9.5	4.5	14
M756	933000000000000	7	M	cocaine	NA	1	0	0	0	0	1	1	1	0	0	0	2	2	7	3	18	25	67	95	91	91	96	105	107	107	15	95	16	145	NA	102	4	0	9.5	0	9.5	6.5	5	11.5
M757	933000000000000	7	M	cocaine	NA	0	3	6	5	2	5	12	3	1	1	1	16	25	33	32	26	12	16	23	29	35	44	36	19	33	7	15	10	40	NA	80	7	25	6	18	24	1.5	30	31.5
M759	933000000000000	7	M	cocaine	NA	26	27	26	29	32	40	43	45	43	14	77	140	114	111	116	124	108	103	126	117	109	108	112	115	108	12	50	12	62	NA	114	21	29	7	5	12	4	7.5	11.5
M760	933000000000000	7	M	cocaine	NA	4	5	1	5	16	20	17	25	17	7	15	103	103	104	99	108	104	115	118	108	48	109	119	114	118	11	40	16	145	NA	89	2	16	10	7.5	17.5	5	9	14
M761	933000000000000	7	M	cocaine	NA	0	2	17	24	7	11	9	5	2	2	2	26	10	24	12	18	49	9	90	20	85	78	69	85	105	8	20	11	50	NA	91	7	19	9.5	7	16.5	3.5	15	18.5
M762	933000000000000	7	M	cocaine	NA	70	61	21	18	43	46	49	54	49	5	9	115	85	73	61	78	69	71	94	84	92	83	60	40	85	14	77	19	268	NA	100	23	24	13.5	7	20.5	3.5	25.5	29
M763	933000000000000	7	M	cocaine	NA	0	1	5	8	11	9	2	5	8	3	4	43	54	52	74	88	91	66	72	82	101	106	78	47	93	14	77	20	328	NA	87	19	22	11.5	12	23.5	4	10.5	14.5
M764	933000000000000	7	M	cocaine	NA	58	3	5	4	1	3	0	1	1	0	0	1	34	9	25	77	96	102	104	105	107	119	124	56	103	2	2	12	62	NA	114	4	13	18	4	22	5	11.5	16.5
M765	933000000000000	7	M	cocaine	NA	12	4	13	24	35	37	39	37	34	14	77	100	106	109	104	119	106	116	122	123	119	116	124	114	113	16	118	18	219	NA	133	27	32	6.5	15.5	22	0	23.5	23.5
M766	933000000000000	7	M	cocaine	NA	13	4	3	0	8	16	3	8	2	4	6	58	63	64	72	95	103	108	103	25	116	110	113	110	93	14	77	14	95	NA	101	4	5	6	9	15	1.5	15	16.5
M767	933000000000000	7	M	cocaine	NA	0	1	1	1	5	5	2	2	1	1	1	41	56	77	60	87	79	95	103	115	127	99	116	104	103	16	118	15	118	NA	116	5	26	9	7.5	16.5	4.5	6	10.5
M768	933000000000000	7	M	cocaine	NA	1	0	0	1	1	2	1	0	0	1	1	2	2	0	0	0	0	0	0	0	1	1	0	0	0	0	0	1	1	NA	3	0	1	6.5	2.5	9	6	0.5	6.5
M769	933000000000000	7	M	cocaine	NA	4	6	6	15	9	14	16	13	10	3	4	25	22	20	17	15	23	16	43	23	45	77	85	68	52	9	25	12	62	NA	86	9	23	8.5	0.5	9	0.5	6.5	7
M770	933000000000000	7	M	cocaine	NA	3	4	4	6	30	43	32	30	27	8	20	90	76	80	79	78	78	88	94	96	89	82	84	89	87	13	62	13	77	NA	83	15	20	6	9.5	15.5	1	13.5	14.5
M771	933000000000000	7	M	cocaine	NA	8	6	4	6	2	20	29	37	32	8	20	115	123	125	110	127	116	111	129	128	136	128	125	110	105	13	62	15	118	NA	115	23	28	6	10.5	16.5	4	9	13
M773	933000000000000	7	M	cocaine	NA	2	1	0	1	4	0	0	0	0	0	0	27	56	62	75	94	98	98	110	121	102	92	118	123	116	14	77	15	118	NA	111	14	28	4.5	11.5	16	3	24	27
M774	933000000000000	7	M	cocaine	NA	2	1	1	3	0	2	0	0	0	0	0	3	3	4	8	7	32	23	26	21	17	18	22	17	24	0	0	11	50	NA	76	3	3	3	2	5	6.5	4.5	11
M775	933000000000000	7	M	cocaine	NA	2	3	3	7	17	30	22	47	37	12	50	79	104	103	106	100	104	108	109	102	92	92	98	109	104	12	50	13	77	NA	101	10	25	4.5	7	11.5	0.5	5.5	6
M776	933000000000000	7	M	cocaine	NA	0	2	0	2	4	8	5	6	6	5	9	87	81	114	109	93	83	57	71	96	94	82	103	102	105	12	50	10	40	NA	100	2	19	2.5	2	4.5	6	5.5	11.5
M777	933000000000000	7	M	cocaine	NA	2	1	0	0	2	0	2	2	2	2	2	33	35	29	16	48	71	36	37	33	75	58	61	105	112	9	25	9	32	NA	116	5	20	9.5	4	13.5	4.5	4.5	9
M779	933000000000000	7	M	cocaine	NA	1	1	0	0	2	1	2	1	1	1	1	4	4	2	3	6	22	26	77	7	112	100	103	64	95	11	40	1	1	NA	63	4	2	11.5	0.5	12	3.5	6	9.5
M780	933000000000000	7	M	cocaine	NA	3	2	3	1	1	10	6	10	5	2	2	36	12	10	8	13	10	15	23	2	13	1	9	7	23	1	1	0	0	NA	NA	4	NA	8.5	2.5	11	0	0	0
M781	933000000000000	7	M	naive	NA	NA	NA	NA	NA	NA	NA	NA	NA	NA	NA	NA	NA	NA	NA	NA	NA	NA	NA	NA	NA	NA	NA	NA	NA	NA	NA	NA	NA	NA	NA	NA	NA	NA	1.5	0	1.5	5	9.5	10.75
M782	933000000000000	7	M	naive	NA	NA	NA	NA	NA	NA	NA	NA	NA	NA	NA	NA	NA	NA	NA	NA	NA	NA	NA	NA	NA	NA	NA	NA	NA	NA	NA	NA	NA	NA	NA	NA	NA	NA	10	0	10	11	1.5	8.5
M783	933000000000000	7	M	naive	NA	NA	NA	NA	NA	NA	NA	NA	NA	NA	NA	NA	NA	NA	NA	NA	NA	NA	NA	NA	NA	NA	NA	NA	NA	NA	NA	NA	NA	NA	NA	NA	NA	NA	6	13.5	19.5	6.5	7	10.25
M784	933000000000000	7	M	naive	NA	NA	NA	NA	NA	NA	NA	NA	NA	NA	NA	NA	NA	NA	NA	NA	NA	NA	NA	NA	NA	NA	NA	NA	NA	NA	NA	NA	NA	NA	NA	NA	NA	NA	8	10	18	3	5	6.5
M785	933000000000000	7	M	naive	NA	NA	NA	NA	NA	NA	NA	NA	NA	NA	NA	NA	NA	NA	NA	NA	NA	NA	NA	NA	NA	NA	NA	NA	NA	NA	NA	NA	NA	NA	NA	NA	NA	NA	9.5	2	11.5	6	0	5.25
M786	933000000000000	7	M	naive	NA	NA	NA	NA	NA	NA	NA	NA	NA	NA	NA	NA	NA	NA	NA	NA	NA	NA	NA	NA	NA	NA	NA	NA	NA	NA	NA	NA	NA	NA	NA	NA	NA	NA	5	5.5	10.5	5.5	5.5	8.75
M787	933000000000000	7	M	naive	NA	NA	NA	NA	NA	NA	NA	NA	NA	NA	NA	NA	NA	NA	NA	NA	NA	NA	NA	NA	NA	NA	NA	NA	NA	NA	NA	NA	NA	NA	NA	NA	NA	NA	5	5	10	5	7	9
F801	933000000000000	8	F	cocaine	NA	21	37	34	14	26	28	30	32	40	10	NA	86	97	116	101	110	114	114	109	112	117	120	120	116	120	13	62	12	62	NA	0	26	125	6.66667	2	7.16667	7.66667	3	9.33333
F802	933000000000000	8	F	cocaine	NA	0	0	0	0	1	0	1	28	34	6	NA	68	115	137	161	139	125	146	148	145	141	168	133	141	79	0	0	13	77	NA	0	2	123	14.6667	0.666667	13.3333	12.6667	0.666667	11.1667
F803	933000000000000	8	F	cocaine	NA	1	0	2	1	4	5	0	3	2	1	NA	5	22	29	67	71	81	109	171	101	116	8	2	4	7	9	25	0	0	NA	0	4	10	3.66667	4.33333	6.5	3	12	12.5
F804	933000000000000	8	F	cocaine	NA	4	1	3	2	0	0	0	3	5	2	NA	16	28	6	21	43	21	16	81	72	98	73	164	97	109	4	6	8	25	NA	0	12	63	14.6667	0	12.1667	13.3333	0.666667	12
F805	933000000000000	8	F	cocaine	NA	4	19	9	1	25	34	30	54	50	9	NA	127	123	233	142	110	133	128	124	118	127	148	142	176	141	4	6	6	15	NA	0	44	153	4.66667	5	8.16667	4.33333	0	3.5
F807	933000000000000	8	F	cocaine	NA	1	1	0	0	1	1	0	1	2	0	NA	1	1	0	2	1	31	105	160	121	121	132	136	250	190	2	2	4	9	NA	0	10	99	3	1	3.5	9.33333	6.66667	9.83333
F808	933000000000000	8	F	cocaine	NA	3	5	3	2	5	19	7	20	12	2	NA	32	41	34	29	40	71	74	101	87	82	91	46	88	76	1	1	0	0	NA	0	1	83	0	2.66667	2.33333	2.33333	1.33333	2.33333
F809	933000000000000	8	F	cocaine	NA	2	3	0	0	6	3	4	9	12	2	NA	15	26	61	83	69	91	101	105	106	104	108	99	97	90	10	32	12	62	NA	0	20	101	5.33333	7.66667	11.3333	NA	NA	NA
F810	933000000000000	8	F	cocaine	NA	0	1	0	0	0	1	0	0	1	0	NA	1	3	0	0	0	0	0	1	1	1	2	33	40	48	14	77	13	77	NA	0	59	62	1.66667	3.33333	4.33333	0.333333	18.6667	12.3333
F811	933000000000000	8	F	cocaine	NA	24	23	16	11	29	22	38	42	40	8	NA	129	137	147	136	126	143	175	178	146	140	160	161	142	141	13	62	12	62	NA	0	4	156	3.66667	2	4.83333	3.66667	5	5.83333
F812	933000000000000	8	F	cocaine	NA	8	5	6	1	51	53	81	92	80	3	NA	155	217	154	200	91	160	157	158	11	9	2	9	10	11	9	25	0	0	NA	0	1	5	4	4	6.66667	4	3.33333	4.5
F813	933000000000000	8	F	cocaine	NA	11	39	53	51	46	50	62	45	54	12	NA	105	108	115	100	116	121	120	132	104	108	118	124	118	89	12	32	12	62	NA	0	32	110	3.66667	3.66667	6.66667	2	5.66667	5
F814	933000000000000	8	F	cocaine	NA	2	4	7	5	12	32	16	37	38	4	NA	90	102	94	138	123	129	143	166	148	151	172	163	218	165	2	2	2	4	NA	0	3	155	3.33333	1	3.66667	6	2.66667	5.33333
F815	933000000000000	8	F	cocaine	NA	1	1	1	0	1	1	1	2	4	3	NA	49	66	45	46	58	112	117	129	157	138	140	13	55	13	11	40	13	62	NA	0	63	13	0	1.33333	1.16667	3.33333	8.33333	7.83333
F816	933000000000000	8	F	cocaine	NA	5	0	0	0	3	0	1	24	25	0	NA	58	68	67	74	80	88	91	71	80	80	79	79	69	77	15	95	11	50	NA	0	1	86	1.66667	2.66667	3.66667	3.66667	10.3333	8.83333
F817	933000000000000	8	F	cocaine	NA	18	26	56	46	52	53	47	42	47	11	NA	108	114	119	108	125	140	139	138	335	113	133	122	119	126	13	62	14	95	NA	0	38	142	1	3.33333	4	4.66667	0.666667	3.83333
F818	933000000000000	8	F	cocaine	NA	3	2	2	1	2	7	3	2	6	0	NA	53	13	0	62	43	73	87	109	92	82	87	99	114	115	10	32	7	20	NA	0	24	100	2.66667	2	3.83333	5	1.66667	4.5
F819	933000000000000	8	F	cocaine	NA	0	1	0	0	108	75	47	45	32	5	NA	142	126	134	115	132	133	130	140	117	123	139	152	136	125	16	118	11	50	NA	0	4	179	6.33333	4.33333	9.33333	5.66667	3.66667	6
F820	933000000000000	8	F	cocaine	NA	8	13	11	9	59	54	63	56	22	6	NA	60	69	104	194	102	105	117	137	130	116	113	120	120	276	5	9	12	62	NA	0	21	96	7	4.66667	10	7.33333	12.6667	13.3333
F821	933000000000000	8	F	cocaine	NA	2	0	0	0	2	1	0	8	2	2	NA	15	4	27	12	25	65	56	30	46	87	52	60	67	55	1	1	6	15	NA	0	35	29	9	2.66667	9.66667	10	3	8.33333
F822	933000000000000	8	F	cocaine	NA	1	2	10	2	5	3	2	0	3	2	NA	9	90	97	77	79	78	87	98	104	116	110	127	123	113	12	50	14	95	NA	0	24	132	9.66667	2.66667	10.5	8	22.3333	19.5
F823	933000000000000	8	F	cocaine	NA	26	28	22	37	37	31	20	33	29	10	NA	76	80	85	84	79	80	101	111	111	105	122	109	108	94	11	62	10	40	NA	0	8	97	14.6667	2.66667	14.8333	1	1.66667	1.66667
F824	933000000000000	8	F	cocaine	NA	27	35	37	29	34	29	31	39	33	12	NA	105	116	93	96	107	107	108	108	103	114	120	121	123	115	12	77	14	95	NA	0	3	124	4	3.66667	6.66667	6.33333	1.66667	5.16667
F826	933000000000000	8	F	cocaine	NA	11	4	4	4	17	34	21	31	25	5	NA	78	80	88	82	109	143	104	119	111	134	139	131	151	119	14	118	13	77	NA	0	22	94	16.3333	2.66667	16.3333	3	15.6667	11.8333
F828	933000000000000	8	F	cocaine	NA	1	0	1	1	8	6	3	36	43	6	NA	43	98	111	110	117	103	104	106	100	106	116	128	101	107	17	145	8	25	NA	0	39	112	5.66667	3.66667	8	4.66667	0.666667	3.5
F829	933000000000000	8	F	cocaine	NA	41	19	17	35	35	42	44	40	49	15	NA	111	86	106	101	98	112	106	106	108	32	120	118	117	113	14	77	9	32	NA	0	27	118	4.33333	2.33333	5.66667	7	1.33333	5.66667
F830	933000000000000	8	F	cocaine	NA	23	17	6	6	26	18	24	19	20	7	NA	39	40	50	42	34	93	75	93	69	70	61	56	84	77	0	0	0	0	NA	0	21	107	9.66667	3.66667	11	7.33333	0	4.5
F831	933000000000000	8	F	naive	NA	NA	NA	NA	NA	NA	NA	NA	NA	NA	NA	NA	NA	NA	NA	NA	NA	NA	NA	NA	NA	NA	NA	NA	NA	NA	NA	NA	NA	NA	NA	NA	NA	NA	1.5	2.33333	3	NA	NA	NA
F832	933000000000000	8	F	naive	NA	NA	NA	NA	NA	NA	NA	NA	NA	NA	NA	NA	NA	NA	NA	NA	NA	NA	NA	NA	NA	NA	NA	NA	NA	NA	NA	NA	NA	NA	NA	NA	NA	NA	1	0.333333	1.33333	NA	NA	NA
F833	933000000000000	8	F	naive	NA	NA	NA	NA	NA	NA	NA	NA	NA	NA	NA	NA	NA	NA	NA	NA	NA	NA	NA	NA	NA	NA	NA	NA	NA	NA	NA	NA	NA	NA	NA	NA	NA	NA	1	0.666667	1.5	NA	NA	NA
F834	933000000000000	8	F	naive	NA	NA	NA	NA	NA	NA	NA	NA	NA	NA	NA	NA	NA	NA	NA	NA	NA	NA	NA	NA	NA	NA	NA	NA	NA	NA	NA	NA	NA	NA	NA	NA	NA	NA	2	2	3.83333	NA	NA	NA
F835	933000000000000	8	F	naive	NA	NA	NA	NA	NA	NA	NA	NA	NA	NA	NA	NA	NA	NA	NA	NA	NA	NA	NA	NA	NA	NA	NA	NA	NA	NA	NA	NA	NA	NA	NA	NA	NA	NA	1	2	2.5	NA	NA	NA
F836	933000000000000	8	F	naive	NA	NA	NA	NA	NA	NA	NA	NA	NA	NA	NA	NA	NA	NA	NA	NA	NA	NA	NA	NA	NA	NA	NA	NA	NA	NA	NA	NA	NA	NA	NA	NA	NA	NA	8	0.666667	7.33333	NA	NA	NA
F837	933000000000000	8	F	cocaine	NA	27	27	27	50	41	50	42	42	37	11	NA	87	96	115	100	104	94	97	107	113	95	101	101	126	123	13	95	11	50	NA	0	42	102	5.33333	1	5.66667	5.33333	3.33333	5.5
M851	933000000000000	8	M	cocaine	NA	3	3	4	7	12	12	3	5	3	2	NA	6	18	35	38	79	89	99	119	105	86	106	131	16	12	1	1	1	1	NA	0	4	258	1	2.33333	3	4	2.33333	4
M852	933000000000000	8	M	cocaine	NA	9	10	3	2	6	6	6	11	7	2	NA	11	8	11	3	3	2	0	6	10	7	7	3	9	7	1	1	3	4	NA	0	5	13	1.33333	0.333333	1.33333	0	21.3333	14
M853	933000000000000	8	M	cocaine	NA	3	5	4	4	21	14	8	10	5	2	NA	7	7	19	48	31	37	40	64	70	223	322	14	11	5	0	0	3	6	NA	0	0	5	1	0.666667	1.5	4	1.66667	4
M854	933000000000000	8	M	cocaine	NA	11	6	6	13	15	14	9	8	5	0	NA	16	9	10	7	6	3	8	4	8	7	7	2	4	2	1	1	1	2	NA	0	1	9	2.66667	2	3.83333	1	11.6667	8.66667
M855	933000000000000	8	M	cocaine	NA	0	0	1	0	0	1	2	2	0	0	NA	1	2	2	1	0	1	2	13	142	29	62	99	99	106	0	0	15	118	NA	0	29	110	1	2	2.5	5	3	5.5
M856	933000000000000	8	M	cocaine	NA	21	18	20	20	17	12	20	32	28	12	NA	0	100	111	104	89	106	108	106	111	118	117	121	114	112	17	145	16	145	NA	0	35	104	8	0.666667	7.33333	1.66667	24	16.6667
M857	933000000000000	8	M	cocaine	NA	0	0	0	0	8	1	0	4	0	0	NA	3	3	2	1	2	2	0	0	1	1	0	2	3	3	0	0	1	1	NA	0	1	8	2.33333	2.66667	4.33333	5	4	6.16667
M858	933000000000000	8	M	cocaine	NA	2	1	0	1	1	3	4	87	12	2	NA	11	2	3	1	14	7	17	65	65	78	95	87	86	89	10	32	12	62	NA	0	5	79	4	12	14	3	5.66667	5.83333
M859	933000000000000	8	M	cocaine	NA	21	30	29	25	29	23	22	25	28	6	NA	77	77	101	72	96	44	88	102	85	98	21	75	104	87	0	0	0	0	NA	0	11	89	3	3.33333	5.5	2	18	13
M860	933000000000000	8	M	cocaine	NA	24	19	19	20	22	26	30	26	31	9	NA	77	80	72	66	82	70	88	106	103	101	73	91	92	98	3	4	0	0	NA	0	11	96	2	5	6	1.66667	10.6667	8
M863	933000000000000	8	M	cocaine	NA	1	1	2	8	4	4	3	1	0	1	NA	7	2	26	2	41	42	7	66	60	53	58	53	76	55	0	0	1	2	NA	0	15	68	0.666667	3.66667	3.83333	10	12	14.1667
M864	933000000000000	8	M	cocaine	NA	6	4	4	4	21	16	15	19	19	7	NA	63	56	61	25	81	95	94	109	80	56	6	57	103	57	3	4	14	95	NA	0	23	117	2	0.333333	2	0.666667	17.6667	12.6667
M865	933000000000000	8	M	cocaine	NA	12	13	16	13	19	19	21	10	4	3	NA	46	27	37	13	31	28	9	59	15	26	20	10	84	82	9	25	8	25	NA	0	3	104	3	8.66667	9.66667	4.33333	13.6667	12.3333
M866	933000000000000	8	M	cocaine	NA	0	1	2	1	1	3	0	2	0	1	NA	6	6	9	8	8	3	2	7	9	0	2	3	4	4	2	2	5	12	NA	0	2	6	3.33333	8.33333	9.83333	2.66667	4.33333	4.83333
M867	933000000000000	8	M	cocaine	NA	3	4	2	3	6	3	5	5	6	2	NA	13	27	45	28	13	8	9	13	10	7	7	7	13	6	2	2	2	2	NA	0	10	16	3.66667	3	5.5	3.66667	7	7.33333
M868	933000000000000	8	M	cocaine	NA	3	6	6	5	7	8	14	14	11	4	NA	37	60	77	101	110	109	104	121	109	113	127	128	115	130	14	77	14	95	NA	0	14	150	7	7.33333	11.8333	3.33333	0.666667	3.5
M869	933000000000000	8	M	cocaine	NA	10	13	5	8	13	16	12	14	10	5	NA	47	54	59	86	99	105	44	115	108	104	86	101	34	4	6	12	2	4	NA	0	3	9	18.6667	1	16.1667	0	18.6667	12.1667
M870	933000000000000	8	M	cocaine	NA	35	13	18	24	22	33	61	48	64	4	NA	123	109	115	86	81	105	116	128	121	132	122	130	127	144	8	20	10	40	NA	0	3	21	2.66667	5	6.5	1.33333	3.33333	3.16667
M871	933000000000000	8	M	cocaine	NA	10	8	6	9	16	13	14	20	14	4	NA	68	97	81	64	76	66	83	109	105	101	92	109	108	125	8	20	2	4	NA	0	18	97	5.33333	6.66667	10.3333	3	2.66667	3.66667
M872	933000000000000	8	M	cocaine	NA	5	4	4	4	5	7	5	6	13	6	NA	42	33	74	50	78	85	97	69	54	63	63	58	92	75	2	2	11	50	NA	0	17	86	1.66667	1.33333	2.33333	NA	NA	NA
M873	933000000000000	8	M	cocaine	NA	1	0	0	0	0	0	0	2	1	0	NA	10	1	9	25	23	18	3	10	30	24	29	33	28	32	1	1	4	9	NA	0	1	40	7.66667	5.66667	11.6667	1.33333	9.33333	7
M874	933000000000000	8	M	cocaine	NA	21	21	20	20	32	42	64	40	34	5	NA	93	98	104	70	114	106	98	151	45	49	50	42	79	82	12	50	12	62	NA	0	5	91	0	1	0.833333	4	22.6667	17.8333
M875	933000000000000	8	M	cocaine	NA	5	4	4	5	18	10	7	17	10	1	NA	38	48	52	66	71	68	54	235	71	60	50	58	73	68	3	4	0	0	NA	0	16	75	6.33333	3.33333	7.83333	9.33333	2	7
M876	933000000000000	8	M	cocaine	NA	2	1	2	10	15	21	1	14	23	6	NA	40	53	79	45	69	87	84	79	254	73	78	91	98	100	2	2	14	95	NA	0	14	100	2.66667	4.66667	6.16667	4.66667	2.33333	4.83333
M877	933000000000000	8	M	cocaine	NA	10	11	7	8	11	5	1	13	31	4	NA	82	83	93	72	79	85	95	94	83	85	83	93	110	101	15	95	14	95	NA	0	3	112	5.66667	5.33333	9.33333	3	1.66667	3
M879	933000000000000	8	M	cocaine	NA	0	2	1	84	39	22	30	34	36	10	NA	58	83	90	95	96	99	99	103	94	83	93	74	99	96	16	118	18	219	NA	0	16	90	1	4	4.16667	2.66667	2.33333	3
M880	933000000000000	8	M	cocaine	NA	11	3	11	6	11	7	2	3	7	2	NA	29	26	36	32	33	58	39	22	27	21	27	32	53	103	7	15	8	25	NA	0	24	105	3.66667	1	4.33333	1.66667	9.33333	7.5
M881	933000000000000	8	M	naive	NA	NA	NA	NA	NA	NA	NA	NA	NA	NA	NA	NA	NA	NA	NA	NA	NA	NA	NA	NA	NA	NA	NA	NA	NA	NA	NA	NA	NA	NA	NA	NA	NA	NA	2	1.66667	3.33333	NA	NA	NA
M882	933000000000000	8	M	naive	NA	NA	NA	NA	NA	NA	NA	NA	NA	NA	NA	NA	NA	NA	NA	NA	NA	NA	NA	NA	NA	NA	NA	NA	NA	NA	NA	NA	NA	NA	NA	NA	NA	NA	2.5	0.333333	2.33333	NA	NA	NA
M883	933000000000000	8	M	naive	NA	NA	NA	NA	NA	NA	NA	NA	NA	NA	NA	NA	NA	NA	NA	NA	NA	NA	NA	NA	NA	NA	NA	NA	NA	NA	NA	NA	NA	NA	NA	NA	NA	NA	8.5	1.33333	8.16667	NA	NA	NA
M884	933000000000000	8	M	naive	NA	NA	NA	NA	NA	NA	NA	NA	NA	NA	NA	NA	NA	NA	NA	NA	NA	NA	NA	NA	NA	NA	NA	NA	NA	NA	NA	NA	NA	NA	NA	NA	NA	NA	2.5	2.66667	4.33333	NA	NA	NA
M886	933000000000000	8	M	naive	NA	NA	NA	NA	NA	NA	NA	NA	NA	NA	NA	NA	NA	NA	NA	NA	NA	NA	NA	NA	NA	NA	NA	NA	NA	NA	NA	NA	NA	NA	NA	NA	NA	NA	7.5	2	7.66667	NA	NA	NA
M887	933000000000000	8	M	naive	NA	NA	NA	NA	NA	NA	NA	NA	NA	NA	NA	NA	NA	NA	NA	NA	NA	NA	NA	NA	NA	NA	NA	NA	NA	NA	NA	NA	NA	NA	NA	NA	NA	NA	3.5	1.66667	4.16667	NA	NA	NA
F902	933000000000000	9	F	cocaine	0	3	1	2	3	4	1	4	6	12	4	9	338	377	80	69	70	71	82	93	110	91	93	87	63	68	9	32	4	9	NA	19	24	19	1.33333	0.666667	6.66667	7	3	6
F904	933000000000000	9	F	cocaine	1	2	0	3	0	27	38	35	34	24	8	25	124	142	159	177	152	167	157	157	172	166	155	172	189	164	12	62	5	12	NA	32	18	32	7	5	11	3.33333	9	8
F905	933000000000000	9	F	cocaine	3	0	0	0	0	0	1	0	0	0	1	1	3	4	5	13	19	11	66	55	61	92	102	117	144	145	14	95	15	118	NA	33	13	33	8	2.66667	9.83333	5.33333	6	7.5
F906	933000000000000	9	F	cocaine	2	0	0	0	0	2	4	9	4	20	3	4	25	12	12	41	12	2	62	60	70	81	111	136	144	149	12	62	4	9	NA	34	7	34	4.66667	4	9.5	4.66667	10	9.83333
F907	933000000000000	9	F	cocaine	0	0	0	0	0	1	0	0	0	0	0	0	4	7	74	48	73	65	94	105	102	170	60	65	103	88	23	603	0	0	NA	20	3	20	7.66667	3.33333	8.83333	10.3333	2.66667	9.16667
F908	933000000000000	9	F	cocaine	82	37	38	41	50	51	43	19	29	19	8	25	202	132	92	188	277	119	124	112	134	148	21	5	35	103	3	6	0	0	NA	8	1	8	2	1.33333	5.5	5.33333	7	8.66667
F909	933000000000000	9	F	cocaine	3	3	3	5	2	8	6	17	22	30	6	15	104	106	87	111	62	57	52	72	83	97	119	113	137	138	13	77	11	50	NA	48	14	48	6	5	10	4.66667	5.33333	6.33333
F910	933000000000000	9	F	cocaine	7	12	1	2	2	3	24	24	14	24	7	20	135	119	213	222	150	172	157	178	170	197	163	133	157	157	15	118	14	95	NA	36	14	36	6.33333	2.66667	10.6667	8	3	6.66667
F911	933000000000000	9	F	cocaine	2	1	4	3	6	15	32	23	34	36	6	15	72	108	95	117	90	113	7	100	90	99	84	38	42	41	0	0	0	0	NA	2	6	2	1	5.33333	6.16667	4.66667	1	3.33333
F912	933000000000000	9	F	cocaine	2	2	7	2	9	35	83	49	27	30	3	6	62	86	87	100	113	268	104	132	111	126	133	127	140	134	9	32	12	62	NA	30	12	30	2	2	6	3.66667	9	8.66667
F913	933000000000000	9	F	cocaine	1	1	0	15	14	14	7	7	8	6	2	4	27	38	93	36	71	54	67	85	104	103	123	119	136	149	12	62	11	50	NA	53	10	53	0	3.66667	6.5	2.66667	8.66667	7.5
F915	933000000000000	9	F	cocaine	2	4	5	4	42	30	37	52	41	40	8	25	108	101	95	113	103	108	123	127	137	134	117	112	114	117	10	40	10	40	NA	27	7	27	8.33333	1.66667	7.83333	5.33333	3.33333	6.16667
F918	933000000000000	9	F	cocaine	6	1	1	2	0	3	5	7	11	10	1	1	59	32	39	5	0	15	2	2	64	70	40	28	30	76	7	20	12	62	NA	30	4	30	0.333333	1.33333	3.33333	2	5.33333	5.16667
F919	933000000000000	9	F	cocaine	5	5	2	2	3	3	13	24	25	34	11	50	87	85	105	114	99	68	76	78	89	106	103	103	106	107	13	77	15	118	NA	33	18	33	2.66667	2.33333	7.33333	7.33333	3	6.5
F920	933000000000000	9	F	cocaine	0	0	0	0	0	0	0	0	0	9	1	1	13	0	4	1	0	0	1	0	0	3	1	2	0	2	0	0	0	0	NA	4	4	4	1	1.66667	5	1.33333	8.66667	6.83333
F921	933000000000000	9	F	cocaine	11	6	11	6	4	6	5	5	2	6	4	9	13	14	9	9	12	4	10	6	9	6	5	7	6	5	2	2	2	4	NA	16	7	16	4	1.33333	5	2.33333	3.66667	3.83333
F922	933000000000000	9	F	cocaine	2	1	0	2	0	4	8	7	13	9	6	15	44	44	38	34	9	27	34	46	16	62	37	30	38	9	0	0	0	0	NA	13	6	13	0.333333	3	5.16667	10.3333	4	9.83333
F923	933000000000000	9	F	cocaine	3	0	5	4	8	36	34	28	28	28	11	50	87	88	95	99	94	84	99	110	113	110	115	100	105	55	8	25	8	25	NA	26	20	26	1	2	6.33333	7	1.66667	5.5
F926	933000000000000	9	F	cocaine	2	4	2	11	19	19	25	22	19	22	6	15	64	65	29	32	47	83	89	81	84	83	79	80	86	88	15	118	12	62	NA	18	6	18	4.66667	2	6.33333	4.66667	4.33333	6
F927	933000000000000	9	F	cocaine	0	3	0	4	3	3	6	19	26	42	9	32	103	95	45	125	128	129	144	143	180	168	159	91	157	141	9	32	9	32	NA	27	28	27	3.33333	2.66667	3.5	2.33333	0.333333	1.83333
F928	933000000000000	9	F	cocaine	11	18	24	27	7	33	34	46	41	43	14	95	103	109	102	90	109	103	107	117	129	119	122	94	124	106	9	32	4	9	NA	35	22	35	1.33333	2	4.83333	2.66667	3.33333	4
F930	933000000000000	9	F	cocaine	9	4	2	0	7	11	8	19	51	40	12	62	125	125	134	137	125	124	126	126	128	133	141	148	149	154	12	62	12	62	NA	33	20	33	2	1.33333	4.66667	2.33333	3	3.33333
F931	933000000000000	9	F	naive	NA	NA	NA	NA	NA	NA	NA	NA	NA	NA	NA	NA	NA	NA	NA	NA	NA	NA	NA	NA	NA	NA	NA	NA	NA	NA	NA	NA	NA	NA	NA	NA	NA	NA	0.333333	2.66667	4.83333	6	2.66667	5.83333
F932	933000000000000	9	F	naive	NA	NA	NA	NA	NA	NA	NA	NA	NA	NA	NA	NA	NA	NA	NA	NA	NA	NA	NA	NA	NA	NA	NA	NA	NA	NA	NA	NA	NA	NA	NA	NA	NA	NA	2.66667	0.333333	4.5	7.33333	0	5
F933	933000000000000	9	F	naive	NA	NA	NA	NA	NA	NA	NA	NA	NA	NA	NA	NA	NA	NA	NA	NA	NA	NA	NA	NA	NA	NA	NA	NA	NA	NA	NA	NA	NA	NA	NA	NA	NA	NA	6.33333	0.333333	6.16667	2.66667	6	6.16667
F935	933000000000000	9	F	cocaine	7	2	2	1	3	3	6	8	6	26	7	20	129	20	15	101	143	114	128	135	151	165	164	172	177	158	14	95	6	15	NA	43	32	43	3.66667	0.666667	5.16667	3	1.33333	2.5
F936	933000000000000	9	F	cocaine	0	1	0	1	2	9	1	4	2	2	2	2	6	3	2	4	21	33	54	55	1	73	87	37	75	92	7	20	0	0	NA	17	9	17	0	0.666667	1	2.66667	1	2.66667
M951	933000000000000	9	M	cocaine	7	1	0	3	4	8	12	11	8	12	5	12	93	88	103	100	92	124	133	130	150	90	166	91	89	188	2	4	2	2	NA	4	0	4	2.33333	7	8	9	0.333333	6
M952	933000000000000	9	M	cocaine	8	17	8	9	7	10	7	9	11	11	3	6	13	8	7	9	9	6	4	2	6	7	0	4	6	4	1	2	3	6	NA	6	1	6	4.33333	2.33333	6	4	2.33333	4.16667
M953	933000000000000	9	M	cocaine	53	14	12	2	3	6	2	0	1	1	2	2	3	2	9	4	5	1	2	2	2	1	0	2	2	2	2	2	0	0	NA	4	0	4	3.66667	0	6	4	7.66667	7.83333
M954	933000000000000	9	M	cocaine	5	5	5	5	2	3	4	0	2	6	1	1	15	21	23	16	30	24	33	31	31	47	43	43	71	87	10	40	1	1	NA	16	1	16	14.3333	4	11.5	3.33333	4.33333	5.5
M955	933000000000000	9	M	cocaine	0	3	12	11	16	18	18	0	18	24	8	25	115	76	113	117	101	111	116	97	89	109	100	111	100	129	15	118	14	95	NA	26	20	26	0	2.33333	7.5	2.66667	10.3333	8.5
M956	933000000000000	9	M	cocaine	7	0	3	4	2	24	23	0	34	36	14	95	103	90	93	96	98	46	95	97	99	116	110	111	105	109	12	62	13	77	NA	49	10	49	5.66667	11	12.8333	10.3333	5.33333	10.8333
M957	933000000000000	9	M	cocaine	10	11	12	11	11	13	17	0	15	21	5	12	102	59	60	84	142	127	113	105	103	139	124	129	124	120	9	32	5	12	NA	5	1	5	6	2.66667	5.5	2.33333	2	3.33333
M960	933000000000000	9	M	cocaine	5	3	15	27	3	31	40	0	36	38	11	50	104	101	98	96	81	99	96	90	91	101	97	109	111	104	5	12	17	178	NA	30	20	30	6.33333	1	7.16667	4.33333	2	4.33333
M961	933000000000000	9	M	cocaine	0	0	0	1	0	0	0	0	0	0	1	1	1	1	3	1	2	35	48	80	86	89	74	78	74	87	5	12	0	0	NA	17	4	17	2.66667	0	3.66667	2.66667	5.33333	5.66667
M962	933000000000000	9	M	cocaine	8	8	7	5	2	9	9	8	5	4	3	6	10	12	16	12	12	14	34	24	35	99	102	114	143	125	12	62	4	6	NA	25	9	25	1.33333	9.66667	10.5	1.66667	7.66667	6
M963	933000000000000	9	M	cocaine	14	9	5	2	3	2	28	9	12	8	3	6	76	68	111	123	124	124	124	131	127	114	124	129	132	117	9	32	1	1	NA	32	6	32	2.33333	10.3333	8.5	3.33333	3.66667	5
M964	933000000000000	9	M	cocaine	6	6	3	3	3	8	4	0	3	3	1	2	14	4	6	4	10	2	9	4	1	0	6	3	1	2	1	1	7	20	NA	6	3	6	1.66667	2	6	5.66667	3.33333	5.66667
M965	933000000000000	9	M	cocaine	0	0	0	2	1	5	11	5	9	14	6	15	45	36	33	24	33	20	32	39	25	65	108	99	92	96	10	40	9	32	NA	23	7	23	0.333333	0	1.83333	1.66667	2.33333	2.5
M966	933000000000000	9	M	cocaine	11	38	10	13	25	26	28	28	32	36	15	118	174	72	134	40	101	31	22	19	12	24	16	25	13	10	7	20	4	9	NA	8	4	8	5.66667	4	7.16667	0.666667	6.66667	4.83333
M967	933000000000000	9	M	cocaine	3	3	20	12	23	15	5	8	13	20	8	25	66	70	74	81	90	94	94	96	101	102	100	99	99	104	7	20	8	25	NA	27	6	27	1.66667	2.66667	8.66667	2.33333	11.3333	8.83333
M968	933000000000000	9	M	cocaine	5	0	4	1	0	8	17	22	17	21	9	32	55	54	61	63	69	75	80	87	91	109	72	27	26	20	3	6	3	6	NA	20	13	20	2	0.666667	6.5	2.66667	7.66667	6.66667
M969	933000000000000	9	M	cocaine	0	2	6	6	6	11	12	10	7	9	4	9	96	112	89	27	12	56	69	71	73	71	80	93	94	16	5	12	4	9	NA	21	2	21	2.33333	9	11.3333	0.666667	9	6
M970	933000000000000	9	M	cocaine	0	35	4	5	5	10	11	8	7	13	3	6	57	44	47	61	92	88	91	88	91	90	95	93	97	101	11	50	8	25	NA	16	11	16	1	0.666667	4.16667	5	0	3.16667
M971	933000000000000	9	M	cocaine	5	4	1	5	3	5	3	4	1	2	1	1	8	10	13	25	47	62	77	97	102	108	107	88	120	129	8	25	1	1	NA	0	1	0	3.66667	0.333333	2.66667	1	1	1.33333
M972	933000000000000	9	M	cocaine	0	7	24	20	15	19	24	31	34	43	15	118	117	95	92	87	79	84	93	95	61	89	87	90	84	86	14	95	16	145	NA	11	10	11	3.33333	11	10.6667	4	7.66667	8.16667
M973	933000000000000	9	M	cocaine	0	0	0	0	0	1	0	1	0	0	0	0	3	0	1	1	1	0	0	0	1	0	0	0	0	0	0	0	0	0	NA	0	1	0	4.33333	9.33333	8.33333	0.666667	6.33333	4.66667
M975	933000000000000	9	M	cocaine	1	5	2	2	2	10	4	7	6	5	6	12	49	65	72	86	89	98	104	100	105	95	105	102	109	113	13	77	15	118	NA	31	3	31	2.66667	7	6.5	1.66667	3	2.83333
M976	933000000000000	9	M	cocaine	7	5	4	7	4	6	7	5	6	5	0	0	8	10	17	24	19	35	32	40	58	67	82	90	86	83	12	62	12	62	NA	0	9	0	4.66667	6.66667	10	8.33333	2.66667	7.33333
M977	933000000000000	9	M	cocaine	9	8	10	9	8	16	15	17	12	7	3	6	43	19	29	27	21	24	39	47	57	91	83	97	96	100	13	77	11	50	NA	10	3	10	3.33333	3.33333	4.33333	1	5.66667	4.5
M979	933000000000000	9	M	cocaine	2	7	9	0	20	21	26	29	21	19	7	20	64	69	59	57	56	69	65	85	91	97	89	94	97	98	12	50	19	268	NA	21	14	21	2.33333	6.66667	8.33333	2.66667	10	8.33333
M981	933000000000000	9	M	naive	NA	NA	NA	NA	NA	NA	NA	NA	NA	NA	NA	NA	NA	NA	NA	NA	NA	NA	NA	NA	NA	NA	NA	NA	NA	NA	NA	NA	NA	NA	NA	NA	NA	NA	6.33333	12	12.5	0.666667	10.3333	7.16667
M982	933000000000000	9	M	naive	NA	NA	NA	NA	NA	NA	NA	NA	NA	NA	NA	NA	NA	NA	NA	NA	NA	NA	NA	NA	NA	NA	NA	NA	NA	NA	NA	NA	NA	NA	NA	NA	NA	NA	2.33333	2	2.66667	1	0	0.5
M983	933000000000000	9	M	naive	NA	NA	NA	NA	NA	NA	NA	NA	NA	NA	NA	NA	NA	NA	NA	NA	NA	NA	NA	NA	NA	NA	NA	NA	NA	NA	NA	NA	NA	NA	NA	NA	NA	NA	9.66667	6.66667	11.5	1.33333	9	6.33333
M984	933000000000000	9	M	naive	NA	NA	NA	NA	NA	NA	NA	NA	NA	NA	NA	NA	NA	NA	NA	NA	NA	NA	NA	NA	NA	NA	NA	NA	NA	NA	NA	NA	NA	NA	NA	NA	NA	NA	3	7.33333	6.66667	0.666667	6.66667	5
M985	933000000000000	9	M	naive	NA	NA	NA	NA	NA	NA	NA	NA	NA	NA	NA	NA	NA	NA	NA	NA	NA	NA	NA	NA	NA	NA	NA	NA	NA	NA	NA	NA	NA	NA	NA	NA	NA	NA	2	4	2.5	0	2	1.16667
M986	933000000000000	9	M	naive	NA	NA	NA	NA	NA	NA	NA	NA	NA	NA	NA	NA	NA	NA	NA	NA	NA	NA	NA	NA	NA	NA	NA	NA	NA	NA	NA	NA	NA	NA	NA	NA	NA	NA	2.66667	6.66667	5	1	2.33333	2.5
M987	933000000000000	9	M	cocaine	12	17	11	13	20	22	24	0	21	28	7	20	73	77	87	119	110	106	105	73	102	113	101	109	110	130	14	95	12	62	NA	7	5	7	4.33333	9	12	6.33333	4.33333	7
M988	933000000000000	9	M	cocaine	2	2	1	0	1	80	56	0	26	27	6	15	75	29	26	18	97	23	88	13	85	86	78	76	97	94	1	2	1	2	NA	22	7	22	9.66667	4	10	6.66667	4.66667	7.83333
F1001	933000000000000	10	F	cocaine	97	93	58	52	55	52	52	58	56	58	15	118	127	111	137	131	131	129	116	126	134	130	127	132	137	128	13	77	11	50	NA	151	24	41	5	5.33333	9.16667	1.66667	0.333333	1.83333
F1002	933000000000000	10	F	cocaine	2	30	34	41	44	34	26	27	28	28	16	145	72	84	81	71	71	68	66	65	72	87	77	67	66	78	17	178	16	145	NA	87	19	24	7.5	2.33333	8.33333	1.33333	0	1.16667
F1003	933000000000000	10	F	cocaine	3	1	1	34	29	34	30	39	41	36	14	95	98	96	101	99	99	112	121	129	112	104	109	97	99	85	17	178	15	118	NA	105	17	21	9	1	7.66667	5	3	6.66667
F1005	933000000000000	10	F	cocaine	71	27	8	35	45	43	33	31	44	38	12	62	266	129	101	99	99	95	106	107	103	81	87	92	79	93	14	95	13	77	NA	114	10	28	11	0	8.83333	5.66667	0	4.83333
F1007	933000000000000	10	F	cocaine	0	2	0	1	3	4	5	23	28	23	6	15	61	92	93	90	90	103	102	99	83	85	98	91	98	104	8	25	9	32	NA	102	3	21	7	5.66667	10.6667	1.66667	18.3333	16
F1009	933000000000000	10	F	cocaine	2	8	4	8	1	3	4	1	3	2	3	4	9	86	74	82	82	104	106	49	83	95	92	94	97	104	3	6	14	95	NA	115	21	16	5	0	4	0.333333	6	5.33333
F1010	933000000000000	10	F	cocaine	0	7	4	4	7	16	31	10	12	11	4	9	51	61	70	78	78	115	98	102	99	102	99	115	130	124	15	118	12	62	NA	111	8	30	8	0.333333	7	14	2.66667	13.3333
F1011	933000000000000	10	F	cocaine	3	19	11	24	10	36	23	31	37	34	11	50	106	109	111	125	125	129	114	119	111	104	110	366	108	125	14	95	16	145	NA	113	16	32	5.5	1.66667	6	8.33333	0.333333	7.5
F1012	933000000000000	10	F	cocaine	26	27	26	27	24	32	6	28	28	31	9	32	120	89	96	95	95	105	98	98	105	114	98	110	118	118	11	50	12	62	NA	103	1	103	2	0	1.33333	2.66667	8.66667	8.83333
F1013	933000000000000	10	F	cocaine	0	3	8	26	36	22	31	29	32	29	3	6	74	70	81	42	42	55	75	58	42	47	27	45	32	30	0	0	7	20	NA	57	4	5	2.5	0.333333	2.16667	6.33333	0.333333	5.66667
F1014	933000000000000	10	F	cocaine	4	0	0	0	1	0	12	7	4	8	2	4	21	39	26	62	62	198	85	164	91	110	115	132	125	71	13	77	7	20	NA	127	19	29	4	0	3	3.66667	3	5.5
F1015	933000000000000	10	F	cocaine	1	2	9	23	42	35	41	42	36	43	11	50	130	101	110	112	112	130	127	111	120	149	127	142	151	143	14	95	17	178	NA	144	8	33	8	2	7.66667	5	7	10
F1016	933000000000000	10	F	cocaine	11	29	23	25	20	19	22	22	22	23	15	118	55	56	61	60	60	60	63	64	60	57	56	64	61	64	22	492	18	219	NA	64	24	32	0	4.33333	3.66667	3.66667	0.666667	3.66667
F1017	933000000000000	10	F	cocaine	2	8	2	52	42	18	32	43	43	38	9	32	112	123	114	108	108	129	127	132	115	104	102	104	87	91	17	178	14	95	NA	192	32	34	4	1.33333	4.5	2.33333	5	6.33333
F1018	933000000000000	10	F	cocaine	0	1	0	0	0	0	0	0	0	2	0	0	2	8	23	20	20	66	30	30	97	96	82	75	102	89	2	4	16	145	NA	78	1	11	2.5	4.33333	6.5	3.33333	0	2.83333
F1019	933000000000000	10	F	cocaine	1	3	1	0	1	1	1	0	0	0	1	1	0	1	2	1	1	28	23	14	7	9	76	1	7	0	4	9	4	9	NA	2	7	8	3	2	4.5	2.66667	0	2.33333
F1020	933000000000000	10	F	cocaine	1	4	0	0	3	3	1	0	0	2	2	2	16	24	21	5	5	4	8	9	7	12	8	1	6	3	2	4	5	12	NA	2	12	5	3	0	2.66667	2.66667	0.333333	2.5
F1021	933000000000000	10	F	cocaine	4	6	3	12	13	27	23	26	18	38	7	20	159	118	53	88	88	34	120	100	116	102	54	43	100	77	6	15	10	40	NA	101	9	31	1	2.66667	3	7.33333	1.33333	7.33333
F1022	933000000000000	10	F	cocaine	0	2	0	3	2	4	6	2	1	1	1	2	108	93	104	97	97	136	117	150	120	119	117	142	145	142	10	40	7	20	NA	146	7	39	5	2.33333	6	3	4.66667	6.5
F1023	933000000000000	10	F	cocaine	7	8	6	9	13	12	5	12	7	12	7	20	77	59	72	76	76	90	95	96	98	105	100	93	115	96	10	40	13	77	NA	98	11	23	2.5	0.333333	2	6.66667	0.333333	5.66667
F1025	933000000000000	10	F	cocaine	2	0	9	8	16	28	33	20	20	34	4	9	88	79	91	35	35	88	64	93	49	76	59	68	65	84	1	1	1	2	NA	60	9	29	3	1.33333	3.66667	5	1.33333	5.16667
F1026	933000000000000	10	F	cocaine	0	2	10	22	30	2	21	24	0	1	8	25	93	81	80	79	79	82	75	71	71	63	63	65	72	69	13	77	16	145	NA	80	0	0	1	1	1.83333	2	0.333333	2.16667
F1029	933000000000000	10	F	cocaine	37	25	60	24	37	51	63	112	125	105	10	40	153	128	190	147	147	180	163	230	172	160	149	165	148	96	10	40	3	6	NA	203	12	40	2.5	1.66667	3.66667	1	0	0.833333
F1030	933000000000000	10	F	cocaine	3	2	0	2	9	11	16	16	12	6	2	4	12	10	29	8	8	1	0	0	2	3	3	76	3	22	0	0	2	4	NA	50	4	7	1.5	0.666667	1.66667	1.33333	0	1.16667
F1031	933000000000000	10	F	naive	NA	NA	NA	NA	NA	NA	NA	NA	NA	NA	NA	NA	NA	NA	NA	NA	NA	NA	NA	NA	NA	NA	NA	NA	NA	NA	NA	NA	NA	NA	NA	NA	NA	NA	4	2	4.83333	2.66667	2	3.83333
F1032	933000000000000	10	F	naive	NA	NA	NA	NA	NA	NA	NA	NA	NA	NA	NA	NA	NA	NA	NA	NA	NA	NA	NA	NA	NA	NA	NA	NA	NA	NA	NA	NA	NA	NA	NA	NA	NA	NA	2	0.666667	2.33333	0.666667	2	2.16667
F1033	933000000000000	10	F	naive	NA	NA	NA	NA	NA	NA	NA	NA	NA	NA	NA	NA	NA	NA	NA	NA	NA	NA	NA	NA	NA	NA	NA	NA	NA	NA	NA	NA	NA	NA	NA	NA	NA	NA	2	5.66667	6.5	1.66667	0.666667	2.16667
F1034	933000000000000	10	F	naive	NA	NA	NA	NA	NA	NA	NA	NA	NA	NA	NA	NA	NA	NA	NA	NA	NA	NA	NA	NA	NA	NA	NA	NA	NA	NA	NA	NA	NA	NA	NA	NA	NA	NA	2.5	1.66667	3.33333	2.33333	0.333333	2.16667
F1035	933000000000000	10	F	naive	NA	NA	NA	NA	NA	NA	NA	NA	NA	NA	NA	NA	NA	NA	NA	NA	NA	NA	NA	NA	NA	NA	NA	NA	NA	NA	NA	NA	NA	NA	NA	NA	NA	NA	1.5	2.33333	3.33333	3.33333	0	2.83333
F1036	933000000000000	10	F	naive	NA	NA	NA	NA	NA	NA	NA	NA	NA	NA	NA	NA	NA	NA	NA	NA	NA	NA	NA	NA	NA	NA	NA	NA	NA	NA	NA	NA	NA	NA	NA	NA	NA	NA	5.5	1	5.33333	0	0	0
F1037	933000000000000	10	F	naive	NA	NA	NA	NA	NA	NA	NA	NA	NA	NA	NA	NA	NA	NA	NA	NA	NA	NA	NA	NA	NA	NA	NA	NA	NA	NA	NA	NA	NA	NA	NA	NA	NA	NA	10.5	2.66667	11	1.33333	0	1
M1052	933000000000000	10	M	cocaine	1	1	2	4	19	12	10	7	5	4	2	4	31	23	9	11	11	8	2	12	4	13	11	2	5	5	3	4	2	4	NA	35	3	8	4	2.33333	5.16667	0.666667	8	6.66667
M1053	933000000000000	10	M	cocaine	10	5	2	8	2	10	5	5	3	4	0	0	17	17	10	4	4	0	4	0	2	2	3	9	7	4	0	0	1	1	NA	16	4	6	4.5	6	8.83333	4.33333	5.33333	8.16667
M1054	933000000000000	10	M	cocaine	4	3	2	2	2	3	3	0	4	4	3	4	16	36	52	44	44	62	78	90	83	88	69	77	67	78	13	77	12	62	NA	101	9	20	6.5	4.33333	8.66667	4.33333	2.66667	6
M1055	933000000000000	10	M	cocaine	10	16	20	25	42	0	36	34	33	47	12	62	93	91	82	88	88	110	126	127	119	126	108	104	98	92	12	62	17	178	NA	103	5	20	3.5	7	8	0.333333	10.6667	8.83333
M1056	933000000000000	10	M	cocaine	5	7	9	18	7	9	18	29	29	28	16	145	83	83	75	75	75	66	70	78	101	79	78	79	82	84	17	178	18	219	NA	101	8	21	2	11	10.3333	2.33333	15.3333	14.1667
M1057	933000000000000	10	M	cocaine	30	3	1	5	4	6	11	4	5	1	1	2	28	53	66	59	59	86	92	97	98	92	94	94	89	93	8	25	11	50	NA	98	18	23	3.5	4	6.16667	2.33333	8	8.66667
M1058	933000000000000	10	M	cocaine	1	1	2	2	4	0	1	2	1	1	0	0	5	4	5	4	4	3	3	1	2	14	47	19	57	40	12	62	11	50	NA	101	2	1	5.5	4.33333	8.16667	1	3.66667	3.66667
M1059	933000000000000	10	M	cocaine	6	6	9	5	3	5	7	8	5	6	3	6	40	80	97	71	71	79	79	94	55	73	80	93	75	49	12	62	13	77	NA	81	4	22	4.5	6.33333	8.83333	0.666667	3	3.16667
M1061	933000000000000	10	M	cocaine	2	23	39	23	20	21	25	33	33	38	13	77	103	108	116	106	106	95	93	100	100	105	99	101	108	99	13	77	11	50	NA	93	18	24	2	0.666667	2.16667	1	4.33333	4.33333
M1062	933000000000000	10	M	cocaine	0	3	17	19	20	17	10	19	19	17	11	50	66	66	74	77	77	66	81	97	57	78	79	79	79	84	14	95	14	95	NA	73	9	9	3	1.66667	3.83333	4.33333	0.333333	3.83333
M1063	933000000000000	10	M	cocaine	16	10	3	6	12	6	12	7	2	3	0	0	29	7	6	5	5	2	7	7	7	37	87	83	85	95	0	0	12	62	NA	76	4	2	6	4	8.33333	4.66667	3	6.33333
M1064	933000000000000	10	M	cocaine	2	2	2	11	8	4	8	5	3	3	1	2	18	38	41	27	27	31	35	45	36	41	48	41	46	42	1	1	10	40	NA	56	3	10	2	3.33333	4.66667	2.33333	0.666667	2.33333
M1065	933000000000000	10	M	cocaine	0	0	4	15	4	2	5	4	4	3	2	4	4	7	34	75	75	107	117	132	131	123	95	100	106	105	10	40	14	95	NA	120	0	6	2.5	2.33333	4.33333	1.66667	3.33333	4.16667
M1066	933000000000000	10	M	cocaine	2	4	1	4	3	0	3	3	3	0	0	0	3	1	2	5	5	4	1	3	2	1	0	3	4	5	2	4	4	9	NA	9	2	3	2.5	2.66667	4.33333	1.66667	2.33333	3.83333
M1067	933000000000000	10	M	cocaine	3	5	2	3	2	5	8	18	23	21	7	20	68	68	76	76	76	85	85	88	90	91	99	97	105	98	12	62	2	4	NA	82	8	25	3	6	7.16667	3	8	9.33333
M1068	933000000000000	10	M	cocaine	11	19	12	7	9	26	11	18	14	4	2	4	22	39	52	43	43	52	62	75	71	70	108	101	112	121	11	50	15	118	NA	107	5	17	2.5	7	7.16667	2	8	7.83333
M1069	933000000000000	10	M	cocaine	2	5	5	11	8	29	18	25	23	30	11	50	96	75	74	88	88	88	93	108	112	117	109	99	99	103	11	50	11	50	NA	95	6	25	0	3	2.66667	0.333333	5.33333	4.66667
M1070	933000000000000	10	M	cocaine	6	6	4	6	3	10	6	9	17	9	4	9	42	27	35	30	30	87	78	102	59	99	82	94	69	92	9	32	10	40	NA	101	9	20	1.5	1.66667	3	2.66667	4.66667	5.66667
M1071	933000000000000	10	M	cocaine	7	37	12	8	5	14	20	29	28	33	10	40	100	98	87	95	95	95	95	112	109	115	112	111	110	117	11	50	12	62	NA	116	12	30	1	5	4.66667	0	15	12.6667
M1073	933000000000000	10	M	cocaine	0	0	0	0	0	0	0	1	0	0	0	0	0	0	0	0	0	0	0	0	0	1	1	2	1	1	0	0	3	6	NA	3	1	2	3	2.33333	4.33333	2.33333	18	16.8333
M1075	933000000000000	10	M	cocaine	3	4	5	7	15	21	18	24	24	34	9	32	67	43	82	104	104	79	123	166	113	116	124	108	119	119	10	40	14	95	NA	122	12	25	4.5	2.33333	5.66667	0	8.33333	6.66667
M1076	933000000000000	10	M	cocaine	2	1	0	3	0	4	17	21	21	20	8	25	55	68	77	89	89	68	75	83	84	79	92	93	91	104	24	737	16	145	NA	99	6	27	1.5	0.666667	1.5	3.66667	9.66667	10.8333
M1077	933000000000000	10	M	cocaine	4	6	2	3	2	2	2	3	6	12	4	9	24	25	30	38	38	71	86	87	96	92	88	88	94	86	16	145	18	219	NA	85	19	22	1.5	3.33333	3.83333	1.66667	8.33333	8
M1078	933000000000000	10	M	cocaine	1	6	13	10	9	17	16	24	24	18	6	15	89	108	121	85	85	95	112	135	113	102	109	118	113	120	14	95	11	50	NA	125	8	29	1.5	1	2	2.33333	8.33333	8.83333
M1079	933000000000000	10	M	cocaine	19	9	4	4	2	2	4	2	5	1	0	0	4	3	3	3	3	2	4	5	1	0	1	2	2	0	1	2	0	0	NA	1	2	4	0.5	8.33333	7.16667	0.666667	3.66667	3.5
M1080	933000000000000	10	M	cocaine	3	2	11	3	2	2	5	4	4	6	4	9	25	42	57	65	65	85	93	92	101	106	94	112	112	103	9	32	8	25	NA	106	4	22	3	7	8.5	8	1.66667	7.83333
M1081	933000000000000	10	M	naive	NA	NA	NA	NA	NA	NA	NA	NA	NA	NA	NA	NA	NA	NA	NA	NA	NA	NA	NA	NA	NA	NA	NA	NA	NA	NA	NA	NA	NA	NA	NA	NA	NA	NA	0	2.33333	1.83333	1.33333	1	1.5
M1082	933000000000000	10	M	naive	NA	NA	NA	NA	NA	NA	NA	NA	NA	NA	NA	NA	NA	NA	NA	NA	NA	NA	NA	NA	NA	NA	NA	NA	NA	NA	NA	NA	NA	NA	NA	NA	NA	NA	2	2.66667	4.16667	0	0	0
M1083	933000000000000	10	M	naive	NA	NA	NA	NA	NA	NA	NA	NA	NA	NA	NA	NA	NA	NA	NA	NA	NA	NA	NA	NA	NA	NA	NA	NA	NA	NA	NA	NA	NA	NA	NA	NA	NA	NA	4	1.66667	4.5	0.333333	0	0.333333
M1084	933000000000000	10	M	naive	NA	NA	NA	NA	NA	NA	NA	NA	NA	NA	NA	NA	NA	NA	NA	NA	NA	NA	NA	NA	NA	NA	NA	NA	NA	NA	NA	NA	NA	NA	NA	NA	NA	NA	3.5	2.33333	4.83333	1.66667	1.66667	2.66667
M1085	933000000000000	10	M	naive	NA	NA	NA	NA	NA	NA	NA	NA	NA	NA	NA	NA	NA	NA	NA	NA	NA	NA	NA	NA	NA	NA	NA	NA	NA	NA	NA	NA	NA	NA	NA	NA	NA	NA	2	4	4.5	4	3.33333	6.16667
M1086	933000000000000	10	M	naive	NA	NA	NA	NA	NA	NA	NA	NA	NA	NA	NA	NA	NA	NA	NA	NA	NA	NA	NA	NA	NA	NA	NA	NA	NA	NA	NA	NA	NA	NA	NA	NA	NA	NA	8.5	1.33333	7.83333	10.3333	1	9.16667
F1101	933000000000000	11	F	cocaine	1	2	6	2	6	50	NA	28	38	35	9	32	74	68	65	69	86	85	89	90	92	111	98	100	97	97	10	40	9	32	NA	99	8	21	8.66667	1.66667	10.3333	NA	NA	NA
F1102	933000000000000	11	F	cocaine	0	0	0	0	0	0	NA	0	0	0	1	1	3	41	3	6	75	79	84	54	78	299	113	89	105	97	13	77	6	15	NA	101	0	0	4.66667	2	6.66667	NA	NA	NA
F1106	933000000000000	11	F	cocaine	0	1	2	0	2	0	NA	0	0	0	1	1	9	21	34	58	72	99	70	23	40	17	46	23	49	93	0	0	0	0	NA	102	0	1	4	3.66667	7.66667	NA	NA	NA
F1107	933000000000000	11	F	cocaine	6	19	40	26	24	23	NA	22	34	30	5	9	76	102	100	86	97	110	118	115	117	121	108	120	125	121	13	77	13	77	NA	118	22	21	10	2.66667	12.6667	NA	NA	NA
F1108	933000000000000	11	F	cocaine	0	0	0	0	0	0	NA	0	1	0	0	0	10	4	4	13	11	12	26	53	49	74	35	53	75	139	20	328	19	268	NA	118	2	3	4.66667	6.66667	11.3333	NA	NA	NA
F1109	933000000000000	11	F	cocaine	0	0	0	0	0	0	NA	2	3	0	0	0	6	2	0	5	5	1	1	0	5	10	3	1	1	1	6	15	7	20	NA	8	8	31	6.33333	2	8.33333	NA	NA	NA
F1110	933000000000000	11	F	cocaine	0	0	1	7	1	0	NA	0	1	0	0	0	2	40	75	63	110	102	94	83	88	104	91	96	104	60	4	9	0	0	NA	97	4	7	13.3333	2.33333	15.6667	NA	NA	NA
F1112	933000000000000	11	F	cocaine	0	2	3	29	36	27	NA	34	30	28	4	9	117	90	89	98	96	81	82	95	96	104	101	130	121	124	14	95	14	95	NA	125	7	20	3.66667	12	15.6667	NA	NA	NA
F1113	933000000000000	11	F	cocaine	13	0	0	0	0	0	NA	0	0	0	0	0	0	0	1	0	50	80	78	73	74	60	34	28	36	62	0	0	0	0	NA	92	2	1	8.33333	2	10.3333	NA	NA	NA
F1114	933000000000000	11	F	cocaine	1	0	0	0	0	0	NA	5	3	34	6	15	159	77	85	94	84	92	78	94	100	107	99	103	108	111	11	50	9	32	NA	116	11	13	8	7.66667	15.6667	NA	NA	NA
F1115	933000000000000	11	F	cocaine	0	0	0	0	0	0	NA	1	2	0	0	0	6	4	3	5	81	112	145	140	132	136	139	136	138	139	9	32	9	32	NA	131	29	26	6.33333	6.33333	12.6667	NA	NA	NA
F1116	933000000000000	11	F	cocaine	3	1	9	14	11	14	NA	18	14	15	NA	NA	41	41	45	46	55	58	56	54	52	57	50	53	51	58	18	219	17	178	NA	54	10	27	4.33333	1.66667	6	NA	NA	NA
F1117	933000000000000	11	F	cocaine	0	0	0	0	1	1	NA	0	1	0	2	4	7	7	2	3	45	8	4	5	8	19	25	30	7	27	1	1	0	0	NA	63	12	12	5.66667	15.3333	21	NA	NA	NA
F1119	933000000000000	11	F	cocaine	0	0	1	0	0	0	NA	0	0	0	0	0	3	59	72	65	100	82	101	106	98	89	96	91	101	99	14	95	13	77	NA	102	54	54	15.3333	3.66667	19	NA	NA	NA
F1121	933000000000000	11	F	cocaine	1	2	8	8	1	0	NA	29	1	20	3	4	55	62	72	85	119	54	71	132	143	117	99	112	126	121	9	32	4	9	NA	122	20	20	3	6.33333	9.33333	NA	NA	NA
F1122	933000000000000	11	F	cocaine	1	1	0	10	34	37	NA	54	44	51	12	62	104	79	89	113	103	85	111	121	116	125	98	120	112	103	8	25	7	20	NA	130	25	25	5	5.33333	10.3333	NA	NA	NA
F1123	933000000000000	11	F	cocaine	8	23	13	12	17	20	NA	19	21	29	6	15	65	77	83	102	109	113	113	119	115	118	121	132	131	145	14	95	12	62	NA	131	33	33	6	4.66667	10.6667	NA	NA	NA
F1124	933000000000000	11	F	cocaine	2	8	31	29	29	29	NA	25	29	24	3	6	66	77	73	88	94	89	94	103	103	114	104	116	129	147	6	15	10	40	NA	112	5	5	3	5.33333	8.33333	NA	NA	NA
F1125	933000000000000	11	F	cocaine	2	2	13	38	25	27	NA	36	36	35	10	40	90	80	79	111	117	120	109	115	124	117	125	135	128	136	10	40	6	15	NA	127	11	39	1.66667	10	11.6667	NA	NA	NA
F1127	933000000000000	11	F	cocaine	4	1	2	3	4	14	NA	25	23	30	5	12	31	14	50	38	31	18	72	36	48	43	27	17	3	2	0	0	1	1	NA	1	2	4	1.33333	1.66667	3	NA	NA	NA
F1128	933000000000000	11	F	cocaine	0	0	1	46	36	18	NA	15	36	31	2	4	70	69	65	78	97	18	6	25	107	90	6	24	2	5	0	0	0	0	NA	54	21	6	12.6667	3.66667	16.3333	NA	NA	NA
F1130	933000000000000	11	F	cocaine	0	1	2	2	19	26	NA	29	21	23	4	9	79	71	70	83	80	76	77	84	88	89	88	100	91	42	5	12	0	0	NA	100	2	33	3.66667	3.33333	7	NA	NA	NA
F1131	NA	11	F	naive	NA	NA	NA	NA	NA	NA	NA	NA	NA	NA	NA	NA	NA	NA	NA	NA	NA	NA	NA	NA	NA	NA	NA	NA	NA	NA	NA	NA	NA	NA	NA	NA	NA	NA	2	3	5	NA	NA	NA
F1132	NA	11	F	naive	NA	NA	NA	NA	NA	NA	NA	NA	NA	NA	NA	NA	NA	NA	NA	NA	NA	NA	NA	NA	NA	NA	NA	NA	NA	NA	NA	NA	NA	NA	NA	NA	NA	NA	7.33333	2	9.33333	NA	NA	NA
F1133	NA	11	F	naive	NA	NA	NA	NA	NA	NA	NA	NA	NA	NA	NA	NA	NA	NA	NA	NA	NA	NA	NA	NA	NA	NA	NA	NA	NA	NA	NA	NA	NA	NA	NA	NA	NA	NA	2.66667	8	10.6667	NA	NA	NA
F1134	NA	11	F	naive	NA	NA	NA	NA	NA	NA	NA	NA	NA	NA	NA	NA	NA	NA	NA	NA	NA	NA	NA	NA	NA	NA	NA	NA	NA	NA	NA	NA	NA	NA	NA	NA	NA	NA	3.33333	0.666667	4	NA	NA	NA
F1135	933000000000000	11	F	cocaine	0	0	18	4	15	1	NA	17	18	20	0	0	71	69	66	73	88	91	89	94	100	93	99	103	101	112	12	62	8	25	NA	108	6	20	11.6667	5	16.6667	NA	NA	NA
F1136	NA	11	F	naive	NA	NA	NA	NA	NA	NA	NA	NA	NA	NA	NA	NA	NA	NA	NA	NA	NA	NA	NA	NA	NA	NA	NA	NA	NA	NA	NA	NA	NA	NA	NA	NA	NA	NA	6.33333	3.33333	9.66667	NA	NA	NA
F1137	933000000000000	11	F	cocaine	0	0	0	0	0	0	NA	0	0	0	0	0	19	0	0	0	58	30	21	15	105	99	27	71	52	70	0	0	0	0	NA	96	0	0	5	1.33333	6.33333	NA	NA	NA
M1151	933000000000000	11	M	cocaine	3	3	8	8	10	11	NA	15	15	13	4	9	30	51	70	83	95	91	93	88	92	99	93	96	92	87	13	77	14	95	NA	85	3	2	7.33333	6.33333	13.6667	NA	NA	NA
M1152	933000000000000	11	M	cocaine	1	0	1	0	0	0	NA	0	0	0	1	1	2	11	21	25	95	48	51	20	17	41	25	27	25	16	3	6	4	6	NA	89	2	4	4.66667	3	7.66667	NA	NA	NA
M1153	933000000000000	11	M	cocaine	3	2	6	15	9	4	NA	9	10	11	2	4	32	31	59	65	74	70	119	113	149	28	28	28	15	5	1	1	2	4	NA	181	6	10	5.66667	10.6667	16.3333	NA	NA	NA
M1154	933000000000000	11	M	cocaine	0	0	1	0	1	1	NA	1	1	0	0	0	7	8	2	7	5	6	7	5	4	5	3	3	0	1	0	0	0	0	NA	1	1	1	3	3	6	NA	NA	NA
M1155	933000000000000	11	M	cocaine	1	1	0	0	0	1	NA	3	2	0	1	1	7	9	5	30	55	60	69	64	57	67	60	60	44	46	0	0	0	0	NA	69	1	1	3.33333	8.33333	11.6667	NA	NA	NA
M1156	933000000000000	11	M	cocaine	0	0	2	0	0	0	NA	5	5	8	3	4	13	15	28	31	39	24	7	3	5	4	2	2	0	0	2	2	2	2	NA	6	2	7	4.33333	0.666667	5	NA	NA	NA
M1158	933000000000000	11	M	cocaine	0	0	0	0	0	1	NA	0	2	2	0	0	36	32	48	30	98	101	84	76	70	128	4	4	45	51	1	1	3	6	NA	86	13	29	4.33333	3.33333	7.66667	NA	NA	NA
M1159	933000000000000	11	M	cocaine	1	23	19	5	3	7	NA	22	29	24	5	12	69	64	72	87	100	103	102	99	114	111	106	106	112	103	14	95	2	4	NA	107	4	3	1.33333	2.66667	4	NA	NA	NA
M1161	933000000000000	11	M	cocaine	2	1	1	0	1	1	NA	3	5	5	2	2	16	36	52	29	34	44	39	42	34	37	19	19	40	76	11	50	11	50	NA	61	1	0	3.33333	9.33333	12.6667	NA	NA	NA
M1162	933000000000000	11	M	cocaine	0	3	3	3	6	6	NA	15	15	17	5	12	40	73	80	92	78	57	91	44	89	72	3	3	48	1	2	4	2	4	NA	38	1	4	3.66667	2.66667	6.33333	NA	NA	NA
M1163	933000000000000	11	M	cocaine	1	0	3	1	2	5	NA	12	10	7	5	12	14	20	21	20	8	15	9	15	23	18	9	9	23	22	2	4	4	6	NA	5	4	6	3	1.33333	4.33333	NA	NA	NA
M1164	933000000000000	11	M	cocaine	1	0	0	4	6	7	NA	8	9	60	1	1	12	46	3	11	10	7	4	2	5	4	4	4	0	2	1	1	0	0	NA	2	3	1	3	3.66667	6.66667	NA	NA	NA
M1165	933000000000000	11	M	cocaine	1	0	2	2	0	0	NA	1	2	2	0	0	6	22	4	4	3	2	0	0	1	2	2	2	0	1	0	0	1	2	NA	5	0	0	3.66667	8.33333	12	NA	NA	NA
M1166	933000000000000	11	M	cocaine	1	0	0	2	0	1	NA	1	3	0	1	1	2	2	5	27	37	32	29	31	29	28	27	27	23	28	0	0	7	20	NA	23	5	13	4	2	6	NA	NA	NA
M1167	933000000000000	11	M	cocaine	1	1	0	3	2	80	NA	66	15	15	6	15	41	82	96	220	72	92	90	86	89	94	36	36	91	89	1	2	1	1	NA	89	2	9	2	2.66667	4.66667	NA	NA	NA
M1168	933000000000000	11	M	cocaine	0	0	3	0	0	0	NA	6	3	0	0	0	11	3	4	59	50	55	76	75	77	82	83	83	101	103	13	77	1	1	NA	98	1	4	2.33333	3.66667	6	NA	NA	NA
M1169	933000000000000	11	M	cocaine	0	0	2	2	3	6	NA	8	27	13	4	9	29	58	70	76	93	106	93	99	88	80	82	82	88	88	5	12	8	25	NA	122	21	21	1.66667	0.666667	2.33333	NA	NA	NA
M1170	933000000000000	11	M	cocaine	5	2	6	6	10	13	NA	20	13	14	4	9	33	54	63	74	83	93	85	19	87	77	40	40	1	4	0	0	1	2	NA	61	6	6	1.66667	3.66667	5.33333	NA	NA	NA
M1171	933000000000000	11	M	cocaine	10	3	6	5	13	11	NA	84	116	74	8	25	176	140	133	121	180	193	194	182	8	192	7	7	262	2	1	1	2	4	NA	241	37	37	3.66667	10.3333	14	NA	NA	NA
M1172	933000000000000	11	M	cocaine	1	9	1	7	7	11	NA	15	13	6	3	6	34	52	69	75	84	90	93	93	84	77	83	83	85	85	12	62	4	9	NA	93	19	19	2.33333	1	3.33333	NA	NA	NA
M1173	933000000000000	11	M	cocaine	0	0	1	0	0	0	NA	1	1	0	0	0	9	0	0	0	73	73	72	71	58	72	64	64	77	64	8	25	16	145	NA	73	20	20	9.33333	6.33333	15.6667	NA	NA	NA
M1175	933000000000000	11	M	cocaine	1	2	4	1	0	2	NA	3	4	3	1	1	16	7	7	7	24	34	42	37	15	70	10	10	71	75	7	20	1	2	NA	89	21	21	2.66667	0.666667	3.33333	NA	NA	NA
M1178	933000000000000	11	M	cocaine	1	1	3	1	0	2	NA	2	0	1	0	0	2	1	3	0	1	5	3	3	5	2	0	0	1	2	0	0	0	0	NA	6	0	0	4	3	7	NA	NA	NA
M1181	NA	11	M	naive	NA	NA	NA	NA	NA	NA	NA	NA	NA	NA	NA	NA	NA	NA	NA	NA	NA	NA	NA	NA	NA	NA	NA	NA	NA	NA	NA	NA	NA	NA	NA	NA	NA	NA	3	2.33333	5.33333	NA	NA	NA
M1182	NA	11	M	naive	NA	NA	NA	NA	NA	NA	NA	NA	NA	NA	NA	NA	NA	NA	NA	NA	NA	NA	NA	NA	NA	NA	NA	NA	NA	NA	NA	NA	NA	NA	NA	NA	NA	NA	4.33333	4.33333	8.66667	NA	NA	NA
M1183	NA	11	M	naive	NA	NA	NA	NA	NA	NA	NA	NA	NA	NA	NA	NA	NA	NA	NA	NA	NA	NA	NA	NA	NA	NA	NA	NA	NA	NA	NA	NA	NA	NA	NA	NA	NA	NA	3.66667	3	6.66667	NA	NA	NA
M1184	NA	11	M	naive	NA	NA	NA	NA	NA	NA	NA	NA	NA	NA	NA	NA	NA	NA	NA	NA	NA	NA	NA	NA	NA	NA	NA	NA	NA	NA	NA	NA	NA	NA	NA	NA	NA	NA	4.66667	12.6667	17.3333	NA	NA	NA
M1185	NA	11	M	naive	NA	NA	NA	NA	NA	NA	NA	NA	NA	NA	NA	NA	NA	NA	NA	NA	NA	NA	NA	NA	NA	NA	NA	NA	NA	NA	NA	NA	NA	NA	NA	NA	NA	NA	0	2	2	NA	NA	NA
M1186	NA	11	M	naive	NA	NA	NA	NA	NA	NA	NA	NA	NA	NA	NA	NA	NA	NA	NA	NA	NA	NA	NA	NA	NA	NA	NA	NA	NA	NA	NA	NA	NA	NA	NA	NA	NA	NA	0.666667	0.666667	1.33333	NA	NA	NA
M1187	NA	11	M	naive	NA	NA	NA	NA	NA	NA	NA	NA	NA	NA	NA	NA	NA	NA	NA	NA	NA	NA	NA	NA	NA	NA	NA	NA	NA	NA	NA	NA	NA	NA	NA	NA	NA	NA	4.66667	5	9.66667	NA	NA	NA
M1188	NA	11	M	naive	NA	NA	NA	NA	NA	NA	NA	NA	NA	NA	NA	NA	NA	NA	NA	NA	NA	NA	NA	NA	NA	NA	NA	NA	NA	NA	NA	NA	NA	NA	NA	NA	NA	NA	2.33333	7.66667	10	NA	NA	NA
F1301	933000000000000	13	F	cocaine	2	5	20	32	29	36	45	49	43	46	11	50	142	97	112	101	33	103	102	115	110	107	121	126	127	115	13	77	13	77	NA	127	25	21	NA	NA	NA	NA	NA	NA
F1302	933000000000000	13	F	cocaine	0	0	0	30	18	3	21	14	32	44	7	20	144	125	128	126	124	114	116	122	130	136	146	130	135	138	8	25	12	62	NA	142	29	27	NA	NA	NA	NA	NA	NA
F1303	933000000000000	13	F	cocaine	0	3	0	1	0	2	27	28	37	39	11	50	118	94	97	91	134	154	147	112	130	149	131	126	131	131	13	77	1	2	NA	7	22	25	NA	NA	NA	NA	NA	NA
F1304	933000000000000	13	F	cocaine	2	1	7	60	16	11	10	30	54	76	3	6	211	211	143	69	94	101	184	98	124	337	217	93	38	36	0	0	2	2	NA	240	34	49	NA	NA	NA	NA	NA	NA
F1305	933000000000000	13	F	cocaine	0	0	0	1	0	5	1	1	0	0	1	1	33	110	105	96	97	145	104	69	36	118	131	144	147	171	12	62	11	50	NA	150	16	25	NA	NA	NA	NA	NA	NA
F1307	933000000000000	13	F	cocaine	7	54	42	48	41	40	47	41	45	44	11	50	120	114	115	125	122	94	104	98	112	119	96	112	100	108	12	62	14	95	NA	121	35	47	NA	NA	NA	NA	NA	NA
F1309	933000000000000	13	F	cocaine	2	2	13	67	38	49	61	59	54	55	9	32	149	109	102	109	111	113	97	106	110	105	105	112	118	104	9	32	9	32	NA	131	37	36	NA	NA	NA	NA	NA	NA
F1310	933000000000000	13	F	cocaine	0	3	4	12	20	12	24	25	32	28	4	9	66	44	82	62	55	64	76	77	75	76	135	170	149	143	4	9	10	40	NA	81	14	37	NA	NA	NA	NA	NA	NA
F1311	933000000000000	13	F	cocaine	3	0	0	1	1	2	4	1	6	13	3	6	69	94	110	95	119	132	121	114	104	151	159	150	117	163	5	12	10	40	NA	138	9	25	NA	NA	NA	NA	NA	NA
F1312	933000000000000	13	F	cocaine	3	103	29	51	37	46	47	58	57	60	10	40	150	135	123	126	18	114	92	97	94	101	113	111	39	123	13	77	16	145	NA	95	4	14	NA	NA	NA	NA	NA	NA
F1313	933000000000000	13	F	cocaine	0	2	8	9	44	46	20	0	39	43	4	9	134	59	109	114	119	133	82	127	85	112	147	152	165	131	12	62	5	12	NA	112	24	39	NA	NA	NA	NA	NA	NA
F1314	933000000000000	13	F	cocaine	0	0	1	0	1	0	0	0	1	0	0	0	0	0	0	0	0	0	1	0	1	0	0	5	118	50	5	12	2	4	NA	108	4	14	NA	NA	NA	NA	NA	NA
F1315	933000000000000	13	F	cocaine	1	1	8	1	12	16	12	5	2	6	2	2	53	85	70	21	28	94	97	87	94	21	92	106	60	71	3	6	7	20	NA	84	23	22	NA	NA	NA	NA	NA	NA
F1316	933000000000000	13	F	cocaine	0	31	32	21	24	24	29	29	34	33	14	95	85	66	68	57	57	61	54	50	54	59	59	59	126	55	17	178	23	603	NA	67	37	28	NA	NA	NA	NA	NA	NA
F1317	933000000000000	13	F	cocaine	3	3	2	8	3	1	1	19	4	7	3	6	69	83	128	116	119	125	119	127	130	183	54	131	142	158	8	25	3	6	NA	132	24	25	NA	NA	NA	NA	NA	NA
F1319	933000000000000	13	F	cocaine	3	10	35	25	10	6	8	9	34	25	5	12	200	35	23	103	60	104	93	91	83	75	67	65	75	69	6	15	4	9	NA	90	0	19	NA	NA	NA	NA	NA	NA
F1320	933000000000000	13	F	cocaine	1	0	1	0	0	0	4	24	7	21	2	4	33	4	11	24	0	36	23	23	16	34	203	44	100	62	0	0	1	2	NA	105	66	26	NA	NA	NA	NA	NA	NA
F1331	933000000000000	13	F	cocaine	1	105	1	1	105	6	6	2	2	11	2	2	66	89	95	111	111	114	91	93	92	83	91	86	93	86	12	62	14	95	NA	78	18	23	NA	NA	NA	NA	NA	NA
F1332	NA	13	F	naive	NA	NA	NA	NA	NA	NA	NA	NA	NA	NA	NA	NA	NA	NA	NA	NA	NA	NA	NA	NA	NA	NA	NA	NA	NA	NA	NA	NA	NA	NA	NA	NA	NA	NA	NA	NA	NA	NA	NA	NA
F1333	NA	13	F	naive	NA	NA	NA	NA	NA	NA	NA	NA	NA	NA	NA	NA	NA	NA	NA	NA	NA	NA	NA	NA	NA	NA	NA	NA	NA	NA	NA	NA	NA	NA	NA	NA	NA	NA	NA	NA	NA	NA	NA	NA
F1334	NA	13	F	naive	NA	NA	NA	NA	NA	NA	NA	NA	NA	NA	NA	NA	NA	NA	NA	NA	NA	NA	NA	NA	NA	NA	NA	NA	NA	NA	NA	NA	NA	NA	NA	NA	NA	NA	NA	NA	NA	NA	NA	NA
F1335	933000000000000	13	F	cocaine	68	40	53	57	53	56	54	58	61	62	10	40	124	119	120	105	109	140	131	131	129	117	132	132	123	133	12	62	12	62	NA	127	26	25	NA	NA	NA	NA	NA	NA
M1351	933000000000000	13	M	cocaine	1	1	1	1	0	0	2	3	1	6	5	12	33	46	30	56	82	101	105	115	103	107	108	99	121	112	19	268	14	95	NA	107	17	32	NA	NA	NA	NA	NA	NA
M1352	933000000000000	13	M	cocaine	1	0	0	0	0	0	2	2	1	3	0	0	84	99	72	109	109	88	84	82	88	93	83	89	96	98	16	145	12	62	NA	99	13	20	NA	NA	NA	NA	NA	NA
M1353	933000000000000	13	M	cocaine	1	6	5	7	6	11	7	8	0	6	0	0	84	64	95	88	104	111	99	105	121	122	106	99	142	120	15	118	15	118	NA	122	26	26	NA	NA	NA	NA	NA	NA
M1354	933000000000000	13	M	cocaine	78	108	60	24	10	3	28	17	0	18	4	9	92	89	84	50	57	62	31	0	0	2	0	0	1	3	1	1	7	20	NA	58	5	15	NA	NA	NA	NA	NA	NA
M1355	933000000000000	13	M	cocaine	1	1	3	33	25	18	28	28	24	24	4	6	70	64	77	75	79	81	92	107	76	69	114	117	122	121	16	145	16	145	NA	110	8	11	NA	NA	NA	NA	NA	NA
M1356	933000000000000	13	M	cocaine	1	1	4	5	15	7	14	20	12	38	7	20	99	101	114	133	143	109	117	103	108	118	121	117	121	124	7	20	14	95	NA	125	21	19	NA	NA	NA	NA	NA	NA
M1357	933000000000000	13	M	cocaine	0	0	0	1	0	2	0	1	1	2	0	0	5	23	51	34	64	80	69	77	88	84	82	56	101	87	0	0	9	32	NA	96	7	4	NA	NA	NA	NA	NA	NA
M1358	933000000000000	13	M	cocaine	9	8	1	1	4	18	27	26	25	22	3	6	90	71	82	77	91	99	93	94	96	100	97	100	88	101	14	95	14	95	NA	106	4	4	NA	NA	NA	NA	NA	NA
M1359	933000000000000	13	M	cocaine	1	2	5	5	25	32	24	24	20	37	11	50	104	100	90	87	84	85	80	82	89	85	92	88	88	84	16	145	15	118	NA	93	15	57	NA	NA	NA	NA	NA	NA
M1360	933000000000000	13	M	cocaine	5	8	9	4	26	22	28	26	28	32	7	20	118	109	106	110	123	149	134	132	143	143	160	130	147	137	13	77	13	77	NA	131	22	23	NA	NA	NA	NA	NA	NA
M1361	933000000000000	13	M	cocaine	0	0	2	0	15	0	10	6	2	3	2	2	44	36	30	32	36	48	40	39	42	42	54	53	59	72	7	20	11	50	NA	102	11	15	NA	NA	NA	NA	NA	NA
M1362	933000000000000	13	M	cocaine	0	0	0	4	4	23	22	9	1	4	2	2	105	114	93	114	105	98	98	87	85	95	107	85	80	87	0	0	0	0	NA	40	9	18	NA	NA	NA	NA	NA	NA
M1363	933000000000000	13	M	cocaine	2	5	9	9	9	10	16	15	6	14	8	25	59	65	82	84	92	98	93	96	108	111	122	94	100	104	9	32	13	77	NA	105	13	20	NA	NA	NA	NA	NA	NA
M1364	933000000000000	13	M	cocaine	12	5	14	14	15	14	16	14	11	19	6	15	40	41	60	43	37	39	53	65	64	92	99	88	99	102	15	118	18	219	NA	103	30	54	NA	NA	NA	NA	NA	NA
M1365	933000000000000	13	M	cocaine	0	1	2	0	2	0	0	6	3	7	1	2	37	27	9	7	9	23	31	28	28	53	54	67	89	95	7	20	5	12	NA	91	3	11	NA	NA	NA	NA	NA	NA
M1366	933000000000000	13	M	cocaine	1	3	7	1	10	29	25	27	28	24	4	9	73	56	80	101	105	94	94	102	105	117	111	122	121	123	14	95	13	77	NA	119	6	6	NA	NA	NA	NA	NA	NA
M1367	933000000000000	13	M	cocaine	2	1	0	1	4	1	2	1	0	1	1	1	32	21	48	73	35	89	83	105	99	100	103	75	107	109	10	40	15	118	NA	118	6	4	NA	NA	NA	NA	NA	NA
M1368	933000000000000	13	M	cocaine	18	21	18	7	13	9	32	21	23	48	8	25	123	135	127	130	124	140	150	133	130	157	139	140	141	132	10	40	14	95	NA	143	26	17	NA	NA	NA	NA	NA	NA
M1369	933000000000000	13	M	cocaine	9	3	1	1	3	6	17	3	5	8	4	6	73	44	55	47	44	46	40	48	49	55	88	93	102	98	14	95	15	118	NA	108	13	29	NA	NA	NA	NA	NA	NA
M1370	933000000000000	13	M	cocaine	1	12	29	33	38	44	43	36	38	43	13	77	112	98	100	101	128	113	104	105	102	90	82	84	90	95	13	77	14	95	NA	92	21	25	NA	NA	NA	NA	NA	NA
M1381	NA	13	M	naive	NA	NA	NA	NA	NA	NA	NA	NA	NA	NA	NA	NA	NA	NA	NA	NA	NA	NA	NA	NA	NA	NA	NA	NA	NA	NA	NA	NA	NA	NA	NA	NA	NA	NA	NA	NA	NA	NA	NA	NA
M1382	NA	13	M	naive	NA	NA	NA	NA	NA	NA	NA	NA	NA	NA	NA	NA	NA	NA	NA	NA	NA	NA	NA	NA	NA	NA	NA	NA	NA	NA	NA	NA	NA	NA	NA	NA	NA	NA	NA	NA	NA	NA	NA	NA
M1383	NA	13	M	naive	NA	NA	NA	NA	NA	NA	NA	NA	NA	NA	NA	NA	NA	NA	NA	NA	NA	NA	NA	NA	NA	NA	NA	NA	NA	NA	NA	NA	NA	NA	NA	NA	NA	NA	NA	NA	NA	NA	NA	NA
M1384	NA	13	M	naive	NA	NA	NA	NA	NA	NA	NA	NA	NA	NA	NA	NA	NA	NA	NA	NA	NA	NA	NA	NA	NA	NA	NA	NA	NA	NA	NA	NA	NA	NA	NA	NA	NA	NA	NA	NA	NA	NA	NA	NA
M1385	NA	13	M	naive	NA	NA	NA	NA	NA	NA	NA	NA	NA	NA	NA	NA	NA	NA	NA	NA	NA	NA	NA	NA	NA	NA	NA	NA	NA	NA	NA	NA	NA	NA	NA	NA	NA	NA	NA	NA	NA	NA	NA	NA
F1401	933000000000000	14	F	cocaine	1	0	0	0	4	0	1	0	4	22	3	NA	2	34	82	85	82	51	46	41	103	91	88	104	119	131	13	NA	0	NA	NA	140	0	0	NA	NA	NA	NA	NA	NA
F1403	933000000000000	14	F	cocaine	3	4	5	4	15	13	13	5	16	18	3	NA	6	19	81	81	96	79	89	82	50	82	88	83	84	86	10	NA	11	NA	NA	80	0	17	NA	NA	NA	NA	NA	NA
F1404	933000000000000	14	F	cocaine	0	2	8	9	21	18	18	13	10	70	6	NA	94	56	152	255	178	42	129	91	127	106	98	102	105	110	4	NA	8	NA	NA	131	17	36	NA	NA	NA	NA	NA	NA
F1406	933000000000000	14	F	cocaine	1	3	2	2	1	2	1	2	0	0	0	NA	3	0	0	1	0	0	0	0	0	1	2	0	0	0	0	NA	0	NA	NA	0	0	0	NA	NA	NA	NA	NA	NA
F1407	933000000000000	14	F	cocaine	0	0	0	0	0	0	0	0	0	1	1	NA	4	1	2	1	6	6	43	63	75	82	94	65	58	89	7	NA	1	NA	NA	105	8	19	NA	NA	NA	NA	NA	NA
F1410	933000000000000	14	F	cocaine	6	2	14	46	33	47	41	43	34	35	7	NA	115	127	130	111	112	109	117	111	128	120	116	126	132	139	6	NA	7	NA	NA	128	26	33	NA	NA	NA	NA	NA	NA
F1411	933000000000000	14	F	cocaine	0	0	0	15	30	15	11	12	13	10	3	NA	19	64	93	102	98	79	81	77	90	84	242	132	15	203	4	NA	2	NA	NA	145	0	7	NA	NA	NA	NA	NA	NA
F1412	933000000000000	14	F	cocaine	20	6	1	15	33	52	51	47	42	42	10	NA	140	137	139	139	119	131	140	110	130	101	99	106	114	116	13	NA	9	NA	NA	80	21	23	NA	NA	NA	NA	NA	NA
F1413	933000000000000	14	F	cocaine	0	1	0	3	2	0	1	0	2	7	2	NA	52	90	107	112	117	121	122	129	135	137	124	129	135	138	11	NA	9	NA	NA	135	5	28	NA	NA	NA	NA	NA	NA
F1416	933000000000000	14	F	cocaine	1	14	7	19	33	23	25	26	27	26	13	NA	85	80	87	85	75	81	70	68	75	66	71	72	75	75	12	NA	9	NA	NA	94	18	30	NA	NA	NA	NA	NA	NA
F1417	933000000000000	14	F	cocaine	4	0	3	16	27	35	32	37	37	151	7	NA	103	114	132	121	112	112	105	113	125	127	115	109	111	139	9	NA	8	NA	NA	121	33	33	NA	NA	NA	NA	NA	NA
F1419	933000000000000	14	F	cocaine	5	44	30	32	37	34	37	41	25	25	10	NA	68	78	92	107	104	111	98	100	99	109	115	113	116	121	10	NA	15	NA	NA	118	35	35	NA	NA	NA	NA	NA	NA
F1421	933000000000000	14	F	cocaine	1	1	2	7	4	7	5	7	2	7	2	NA	19	16	17	22	17	9	6	9	90	87	58	62	52	104	7	NA	11	NA	NA	123	26	26	NA	NA	NA	NA	NA	NA
F1422	933000000000000	14	F	cocaine	1	0	1	0	4	7	5	1	4	5	1	NA	2	0	2	14	51	48	106	104	103	116	118	103	118	111	13	NA	10	NA	NA	90	26	26	NA	NA	NA	NA	NA	NA
F1423	933000000000000	14	F	cocaine	1	11	7	1	18	20	17	12	11	12	5	NA	96	63	70	107	86	102	92	87	78	64	62	68	74	96	11	NA	10	NA	NA	93	1	1	NA	NA	NA	NA	NA	NA
F1424	933000000000000	14	F	cocaine	3	8	11	9	21	16	19	16	35	33	9	NA	85	81	102	113	99	96	122	103	101	103	110	121	141	133	6	NA	4	NA	NA	104	16	16	NA	NA	NA	NA	NA	NA
F1425	933000000000000	14	F	cocaine	2	3	1	5	6	5	8	6	4	8	2	NA	15	8	17	24	16	12	6	12	28	23	69	13	30	9	4	NA	2	NA	NA	68	7	20	NA	NA	NA	NA	NA	NA
F1426	933000000000000	14	F	cocaine	24	22	26	31	38	38	46	44	14	33	13	NA	89	89	103	116	104	101	100	93	108	105	108	110	114	119	16	NA	18	NA	NA	112	27	37	NA	NA	NA	NA	NA	NA
F1428	933000000000000	14	F	cocaine	0	0	1	4	5	0	0	0	3	46	3	NA	20	24	86	72	34	75	9	16	29	38	13	10	3	13	1	NA	2	NA	NA	17	1	10	NA	NA	NA	NA	NA	NA
F1429	933000000000000	14	F	cocaine	1	0	0	2	11	27	18	19	14	23	7	NA	61	86	100	119	101	114	121	116	68	115	104	110	113	104	16	NA	14	NA	NA	72	0	2	NA	NA	NA	NA	NA	NA
F1431	933000000000000	14	F	cocaine	2	1	1	4	18	21	3	23	3	44	1	NA	98	70	94	117	110	110	81	67	128	105	131	141	99	124	17	NA	13	NA	NA	103	17	18	NA	NA	NA	NA	NA	NA
F1432	933000000000000	14	F	cocaine	1	1	0	2	1	1	0	2	0	7	2	NA	18	23	25	42	87	93	88	87	144	121	72	95	59	94	0	NA	3	NA	NA	25	2	9	NA	NA	NA	NA	NA	NA
F1433	933000000000000	14	F	cocaine	1	0	1	0	1	0	0	0	4	0	1	NA	12	13	23	45	65	84	42	85	55	97	47	44	35	69	0	NA	1	NA	NA	64	7	7	NA	NA	NA	NA	NA	NA
M1451	933000000000000	14	M	cocaine	0	0	2	0	10	11	28	5	7	31	2	NA	25	51	72	91	86	79	75	68	97	69	69	65	68	82	2	NA	9	NA	NA	70	3	22	NA	NA	NA	NA	NA	NA
M1452	933000000000000	14	M	cocaine	2	3	4	12	9	6	4	2	3	5	1	NA	22	11	10	11	13	5	4	4	7	4	4	3	5	15	2	NA	2	NA	NA	44	4	2	NA	NA	NA	NA	NA	NA
M1453	933000000000000	14	M	cocaine	0	0	1	17	29	25	26	31	41	36	10	NA	73	93	103	98	107	107	107	107	109	114	117	118	117	113	13	NA	13	NA	NA	112	7	22	NA	NA	NA	NA	NA	NA
M1454	933000000000000	14	M	cocaine	3	2	1	2	2	4	4	17	12	18	5	NA	59	80	104	110	137	130	155	132	158	145	145	140	151	146	11	NA	16	NA	NA	144	15	38	NA	NA	NA	NA	NA	NA
M1455	933000000000000	14	M	cocaine	0	0	0	0	2	4	0	2	11	1	0	NA	20	25	37	80	79	76	92	87	90	94	99	94	99	103	17	NA	18	NA	NA	90	6	20	NA	NA	NA	NA	NA	NA
M1456	933000000000000	14	M	cocaine	0	0	0	0	2	0	0	0	0	0	0	NA	10	3	2	27	22	28	1	2	14	59	1	15	0	50	0	NA	0	NA	NA	15	3	5	NA	NA	NA	NA	NA	NA
M1457	933000000000000	14	M	cocaine	1	1	2	12	6	7	8	4	7	3	2	NA	29	24	10	17	10	12	9	9	14	13	15	9	11	16	1	NA	0	NA	NA	23	5	10	NA	NA	NA	NA	NA	NA
M1458	933000000000000	14	M	cocaine	0	0	0	3	1	1	0	0	0	3	0	NA	6	1	5	7	9	5	3	4	9	84	5	10	91	248	12	NA	4	NA	NA	144	5	4	NA	NA	NA	NA	NA	NA
M1460	933000000000000	14	M	cocaine	2	0	0	0	0	10	30	28	29	36	11	NA	104	103	107	97	97	103	106	119	123	119	130	142	135	115	10	NA	0	NA	NA	101	8	28	NA	NA	NA	NA	NA	NA
M1461	933000000000000	14	M	cocaine	3	3	6	19	21	26	21	20	23	26	9	NA	83	95	95	110	117	131	141	113	121	90	98	116	67	120	8	NA	15	NA	NA	101	11	36	NA	NA	NA	NA	NA	NA
M1464	933000000000000	14	M	cocaine	0	0	0	0	0	1	69	41	33	50	9	NA	122	75	111	116	120	111	118	118	149	133	142	125	136	139	17	NA	17	NA	NA	134	12	28	NA	NA	NA	NA	NA	NA
M1465	933000000000000	14	M	cocaine	0	2	2	7	30	19	25	26	29	37	8	NA	106	98	87	76	81	68	79	74	77	75	86	85	85	93	1	NA	2	NA	NA	90	5	17	NA	NA	NA	NA	NA	NA
M1466	933000000000000	14	M	cocaine	0	0	0	1	0	0	0	1	12	3	3	NA	25	13	19	32	34	27	30	48	62	77	91	87	81	84	9	NA	11	NA	NA	92	4	4	NA	NA	NA	NA	NA	NA
M1467	933000000000000	14	M	cocaine	9	18	12	13	14	20	18	17	21	21	7	NA	61	36	30	48	50	40	48	56	48	35	69	77	73	40	5	NA	15	NA	NA	67	16	16	NA	NA	NA	NA	NA	NA
M1468	933000000000000	14	M	cocaine	1	1	3	27	26	20	12	12	15	22	9	NA	83	112	90	80	86	93	110	116	119	103	106	109	117	116	12	NA	14	NA	NA	95	18	18	NA	NA	NA	NA	NA	NA
M1469	933000000000000	14	M	cocaine	0	0	1	4	17	9	10	11	18	13	4	NA	41	28	49	69	78	94	113	97	104	102	97	99	102	107	7	NA	11	NA	NA	83	15	15	NA	NA	NA	NA	NA	NA
M1470	933000000000000	14	M	cocaine	4	3	1	1	12	6	9	11	10	14	3	NA	41	27	45	49	20	58	82	40	110	107	96	88	90	117	11	NA	11	NA	NA	104	7	7	NA	NA	NA	NA	NA	NA
M1471	933000000000000	14	M	cocaine	0	2	2	2	4	10	19	13	11	19	NA	NA	72	43	68	86	94	13	18	101	51	48	3	13	0	94	1	NA	12	NA	NA	84	19	19	NA	NA	NA	NA	NA	NA
M1472	933000000000000	14	M	cocaine	1	0	0	2	11	18	11	20	17	23	6	NA	79	57	52	61	57	59	60	52	31	96	103	77	84	91	0	NA	15	NA	NA	87	17	17	NA	NA	NA	NA	NA	NA
M1473	933000000000000	14	M	cocaine	0	0	0	1	1	0	4	8	4	31	2	NA	72	68	75	93	93	99	105	96	302	101	92	82	92	88	9	NA	9	NA	NA	63	25	25	NA	NA	NA	NA	NA	NA
M1474	933000000000000	14	M	cocaine	1	2	1	2	2	1	24	20	28	28	7	NA	72	48	40	74	80	93	55	61	92	62	84	36	37	59	0	NA	0	NA	NA	82	0	0	NA	NA	NA	NA	NA	NA
M1475	933000000000000	14	M	cocaine	1	0	0	1	3	3	1	2	0	0	0	NA	4	3	4	5	10	18	15	14	19	36	37	33	41	66	3	NA	1	NA	NA	68	3	15	NA	NA	NA	NA	NA	NA
M1476	933000000000000	14	M	cocaine	1	3	3	2	6	1	2	0	2	1	2	NA	25	6	2	4	3	3	2	5	10	19	62	81	85	97	0	NA	3	NA	NA	112	12	15	NA	NA	NA	NA	NA	NA
M1477	933000000000000	14	M	cocaine	0	1	0	0	0	23	12	14	14	18	10	NA	48	39	37	29	22	27	31	22	33	26	30	24	25	22	2	NA	5	NA	NA	17	3	10	NA	NA	NA	NA	NA	NA
M1478	933000000000000	14	M	cocaine	6	8	4	6	15	13	16	18	22	28	9	NA	71	91	88	85	85	95	91	107	125	116	112	110	101	107	15	NA	18	NA	NA	103	10	24	NA	NA	NA	NA	NA	NA
M1479	933000000000000	14	M	cocaine	0	0	0	1	3	1	3	0	1	5	3	NA	5	14	88	89	78	83	70	71	103	114	105	126	124	114	9	NA	14	NA	NA	102	9	15	NA	NA	NA	NA	NA	NA
M1480	933000000000000	14	M	cocaine	2	0	1	1	4	6	3	7	9	30	8	NA	124	110	109	99	97	99	112	113	113	98	95	87	111	100	6	NA	12	NA	NA	103	11	29	NA	NA	NA	NA	NA	NA
M1481	933000000000000	14	M	naive	NA	NA	NA	NA	NA	NA	NA	NA	NA	NA	NA	NA	NA	NA	NA	NA	NA	NA	NA	NA	NA	NA	NA	NA	NA	NA	NA	NA	NA	NA	NA	NA	NA	NA	NA	NA	NA	NA	NA	NA
M1482	933000000000000	14	M	naive	NA	NA	NA	NA	NA	NA	NA	NA	NA	NA	NA	NA	NA	NA	NA	NA	NA	NA	NA	NA	NA	NA	NA	NA	NA	NA	NA	NA	NA	NA	NA	NA	NA	NA	NA	NA	NA	NA	NA	NA
M1483	933000000000000	14	M	naive	NA	NA	NA	NA	NA	NA	NA	NA	NA	NA	NA	NA	NA	NA	NA	NA	NA	NA	NA	NA	NA	NA	NA	NA	NA	NA	NA	NA	NA	NA	NA	NA	NA	NA	NA	NA	NA	NA	NA	NA
M1484	933000000000000	14	M	naive	NA	NA	NA	NA	NA	NA	NA	NA	NA	NA	NA	NA	NA	NA	NA	NA	NA	NA	NA	NA	NA	NA	NA	NA	NA	NA	NA	NA	NA	NA	NA	NA	NA	NA	NA	NA	NA	NA	NA	NA
M1485	933000000000000	14	M	naive	NA	NA	NA	NA	NA	NA	NA	NA	NA	NA	NA	NA	NA	NA	NA	NA	NA	NA	NA	NA	NA	NA	NA	NA	NA	NA	NA	NA	NA	NA	NA	NA	NA	NA	NA	NA	NA	NA	NA	NA
M1486	933000000000000	14	M	cocaine	10	2	5	3	33	7	31	36	24	40	9	NA	140	124	139	106	117	118	125	124	118	140	137	130	130	115	13	NA	16	NA	NA	126	13	32	NA	NA	NA	NA	NA	NA
M1488	933000000000000	14	M	cocaine	1	1	2	7	5	26	19	21	16	24	5	NA	82	55	48	56	71	76	103	105	107	109	113	121	112	120	13	NA	7	NA	NA	168	5	26	NA	NA	NA	NA	NA	NA
F1501	933000000000000	15	F	cocaine	0	0	1	1	0	1	4	0	0	0	1	1	6	3	4	9	5	9	6	4	53	55	34	60	90	83	11	50	12	62		84	1	0
F1503	933000000000000	15	F	cocaine	0	0	1	1	2	2	0	0	0	0	0	0	1	4	0	1	0	0	0	0	0	0	0	0	0	0	0	0	0	0		0	0	0
F1504	933000000000000	15	F	cocaine	1	1	0	1	4	6	1	0	1	2	1	1	16	39	9	9	21	14	76	36	64	86	37	59	89	296	1	1	3	6		127	5	1
F1505	933000000000000	15	F	cocaine	2	0	1	1	0	0	0	0	0	3	3	6	66	62	63	96	120	112	110	114	99	100	106	116	114	109	16	145	13	77		111	18	27
F1506	933000000000000	15	F	cocaine	1	1	0	0	0	0	0	0	4	1	2	2	23	13	74	92	99	107	115	125	108	106	63	117	125	113	3	6	9	32		105	11	3
F1507	933000000000000	15	F	cocaine	0	2	0	0	4	55	36	44	29	41	5	12	119	121	112	135	130	126	122	110	98	94	106	106	119	123	12	62	11	50		114	23	24
F1510	933000000000000	15	F	cocaine	8	6	8	7	4	8	7	3	9	4	4	9	29	90	75	95	126	102	93	2	1	2	3	70	121	95	1	1	3	6		118	26	0
F1511	933000000000000	15	F	cocaine	3	2	0	4	49	51	42	48	40	48	9	32	408	114	95	118	116	115	120	133	115	113	122	128	126	103	3	6	4	9		110	0	0
F1512	933000000000000	15	F	cocaine	2	0	0	0	41	37	44	61	57	60	11	50	146	161	153	166	144	151	140	136	134	131	141	140	124	209	4	9	4	9		44	7	7
F1513	933000000000000	15	F	cocaine	1	0	0	0	0	2	1	2	5	31	10	40	129	138	147	129	132	130	123	168	113	203	137	123	139	138	6	15	11	50		194	21	42
F1514	933000000000000	15	F	cocaine	1	5	8	14	42	40	20	22	47	39	12	62	121	130	132	139	113	121	116	110	109	124	111	123	122	115	17	178	1	1		95	12	32
F1515	933000000000000	15	F	cocaine	0	1	1	0	0	0	0	0	1	1	2	4	1	3	3	3	9	35	65	64	48	62	54	120	122	88	2	4	3	6		38	7	33
F1516	933000000000000	15	F	cocaine	13	1	3	15	16	15	17	18	20	19	15	118	52	51	52	44	39	43	45	45	44	47	48	50	50	51	16	145	18	219		51	15	23
F1517	933000000000000	15	F	cocaine	0	2	71	56	28	23	28	23	24	26	8	25	72	78	95	105	119	107	103	103	108	112	110	108	106	122	14	95	13	77		141	21	26
F1519	933000000000000	15	F	cocaine	0	1	1	2	8	36	15	2	53	51	15	118	133	128	110	113	108	68	116	101	89	132	125	126	128	113	12	62	12	62		109	0	0
F1520	933000000000000	15	F	cocaine	3	6	134	17	84	67	102	120	69	63	3	6	96	236	157	156	151	151	176	165	134	167	168	180	141	151	14	95	16	145		124	1	4
F1521	933000000000000	15	F	cocaine	0	6	4	3	4	4	3	1	0	0	1	2	26	22	58	89	93	95	103	126	118	130	135	138	154	143	8	25	8	25		128	5	4
F1522	933000000000000	15	F	cocaine	0	0	2	63	31	25	30	27	30	20	10	40	92	91	93	129	121	119	100	93	94	106	108	102	110	92	10	40	10	40		74	10	23
F1523	933000000000000	15	F	cocaine	0	0	0	7	69	43	33	27	8	30	10	40	127	121	129	113	107	120	122	136	128	130	131	137	146	115	9	32	10	40		140	27	18
F1524	933000000000000	15	F	cocaine	1	2	43	33	22	26	19	16	11	10	8	25	134	108	139	108	114	107	120	117	119	126	138	143	184	117	9	32	5	12		108	9	12
F1525	933000000000000	15	F	cocaine	13	13	17	15	44	31	38	34	38	36	11	50	125	115	94	96	100	98	111	110	106	116	119	122	116	107	13	77	16	145		109	27	36
F1526	933000000000000	15	F	cocaine	7	96	34	12	15	22	26	31	32	35	12	62	93	94	94	93	95	97	101	92	97	91	108	101	105	100	13	77	13	77		102	27	28
F1527	933000000000000	15	F	cocaine	0	2	1	1	11	7	0	4	27	33	13	77	129	119	115	46	127	116	120	129	106	120	126	161	78	139	11	50	0	0		84	0	0
F1529	933000000000000	15	F	cocaine	0	0	0	0	1	1	0	1	0	1	3	6	40	46	68	73	76	83	74	87	79	82	84	84	105	109	11	50	7	20		88	19	19
F1530	933000000000000	15	F	cocaine	2	1	0	0	8	95	67	0	2	5	9	32	123	152	147	139	138	167	312	169	190	194	189	183	211	173	13	77	14	95		181	14	32
F1531	933000000000000	15	F	naive	NA	NA	NA	NA	NA	NA	NA	NA	NA	NA	NA	NA	NA	NA	NA	NA	NA	NA	NA	NA	NA	NA	NA	NA	NA	NA	NA	NA	NA	NA	NA	NA	NA	NA
F1532	933000000000000	15	F	naive	NA	NA	NA	NA	NA	NA	NA	NA	NA	NA	NA	NA	NA	NA	NA	NA	NA	NA	NA	NA	NA	NA	NA	NA	NA	NA	NA	NA	NA	NA	NA	NA	NA	NA
F1533	933000000000000	15	F	naive	NA	NA	NA	NA	NA	NA	NA	NA	NA	NA	NA	NA	NA	NA	NA	NA	NA	NA	NA	NA	NA	NA	NA	NA	NA	NA	NA	NA	NA	NA	NA	NA	NA	NA
F1534	933000000000000	15	F	naive	NA	NA	NA	NA	NA	NA	NA	NA	NA	NA	NA	NA	NA	NA	NA	NA	NA	NA	NA	NA	NA	NA	NA	NA	NA	NA	NA	NA	NA	NA	NA	NA	NA	NA
F1535	933000000000000	15	F	naive	NA	NA	NA	NA	NA	NA	NA	NA	NA	NA	NA	NA	NA	NA	NA	NA	NA	NA	NA	NA	NA	NA	NA	NA	NA	NA	NA	NA	NA	NA	NA	NA	NA	NA
F1536	933000000000000	15	F	naive	NA	NA	NA	NA	NA	NA	NA	NA	NA	NA	NA	NA	NA	NA	NA	NA	NA	NA	NA	NA	NA	NA	NA	NA	NA	NA	NA	NA	NA	NA	NA	NA	NA	NA
F1537	933000000000000	15	F	naive	NA	NA	NA	NA	NA	NA	NA	NA	NA	NA	NA	NA	NA	NA	NA	NA	NA	NA	NA	NA	NA	NA	NA	NA	NA	NA	NA	NA	NA	NA	NA	NA	NA	NA
M1551	933000000000000	15	M	cocaine	0	1	1	2	6	5	3	1	4	3	1	1	75	49	56	62	57	70	58	106	103	71	78	97	114	109	11	50	11	50		83	3	25
M1552	933000000000000	15	M	cocaine	0	0	1	1	3	5	4	6	5	1	2	4	17	11	11	10	7	9	8	14	5	3	8	5	12	15	1	1	1	1		3	1	2
M1553	933000000000000	15	M	cocaine	3	82	21	21	28	15	30	36	35	28	13	77	112	107	127	107	102	29	99	108	102	110	91	103	127	110	14	95	13	77		117	6	25
M1554	933000000000000	15	M	cocaine	0	2	5	13	32	23	33	4	35	35	9	32	85	74	79	80	74	84	80	94	89	88	88	99	89	82	9	32	11	50		67	21	23
M1555	933000000000000	15	M	cocaine	0	0	0	0	2	0	0	1	1	0	1	1	39	84	97	90	107	105	120	93	95	104	108	111	99	106	11	50	10	40		91	16	26
M1556	933000000000000	15	M	cocaine	1	3	2	2	3	1	5	19	2	1	2	2	17	30	32	83	85	101	94	103	105	128	115	131	131	134	14	95	13	77		118	4	26
M1557	933000000000000	15	M	cocaine	0	1	0	1	1	2	1	1	1	3	1	1	3	1	2	3	2	2	1	2	1	3	1	4	4	0	1	1	0	0		2	7	11
M1558	933000000000000	15	M	cocaine	3	2	2	2	1	3	0	3	1	2	0	0	11	12	16	16	12	8	15	15	29	19	74	88	93	89	6	15	11	50		120	3	4
M1559	933000000000000	15	M	cocaine	1	9	15	10	17	22	17	8	24	24	8	25	109	33	235	192	54	187	79	94	97	93	95	91	91	93	15	118	14	95		91	11	21
M1560	933000000000000	15	M	cocaine	0	3	10	27	19	12	13	14	23	25	6	15	94	101	96	114	105	110	63	124	113	122	123	126	122	34	8	25	4	9		20	5	22
M1561	933000000000000	15	M	cocaine	1	44	67	2	30	19	27	41	38	32	10	40	135	121	65	122	108	123	119	232	90	106	101	125	129	109	0	0	9	32		46	11	4
M1562	933000000000000	15	M	cocaine	0	0	3	19	18	8	20	16	28	15	4	9	59	33	72	101	102	142	125	112	74	103	98	105	109	114	17	178	4	9		125	11	33
M1563	933000000000000	15	M	cocaine	4	6	12	19	26	22	18	16	9	8	6	15	44	87	90	106	108	112	116	111	101	99	99	98	98	108	13	77	10	40		124	10	4
M1564	933000000000000	15	M	cocaine	3	4	4	10	24	49	12	3	5	3	2	2	12	9	6	11	5	10	7	6	67	82	85	110	105	96	9	32	17	178		99	8	19
M1567	933000000000000	15	M	cocaine	80	32	22	11	25	30	30	28	31	27	11	50	86	78	86	93	99	91	93	82	74	77	83	91	100	100	14	95	14	95		109	14	27
M1568	933000000000000	15	M	cocaine	1	0	0	1	3	1	2	0	0	0	1	1	6	3	3	7	2	1	3	0	1	0	0	2	2	2	0	0	1	1		8	0	1
M1569	933000000000000	15	M	cocaine	3	1	1	1	2	1	2	0	0	0	2	2	9	11	3	30	51	89	90	94	97	100	69	97	101	109	1	1	13	77		109	6	3
M1571	933000000000000	15	M	cocaine	2	14	3	19	16	9	5	4	12	16	8	25	53	82	72	99	111	112	119	138	126	128	130	136	129	129	15	118	1	2		102	5	44
M1572	933000000000000	15	M	cocaine	8	7	13	22	23	17	15	15	17	23	13	77	89	94	97	94	104	98	102	84	102	120	116	119	107	108	9	32	10	40		112	19	25
M1573	933000000000000	15	M	cocaine	2	3	11	10	11	15	16	14	19	13	5	12	42	58	68	108	103	118	105	118	112	136	129	100	114	107	0	0	9	32		27	3	4
M1574	933000000000000	15	M	cocaine	0	10	7	18	15	17	14	14	21	21	8	25	64	74	58	42	53	51	53	48	62	80	71	95	90	99	10	40	12	62		67	3	4
M1575	933000000000000	15	M	cocaine	3	6	4	15	25	18	16	17	5	13	9	32	102	87	99	125	126	111	121	122	124	120	133	129	134	121	10	40	8	25		121	14	36
M1576	933000000000000	15	M	cocaine	3	4	6	2	3	6	4	2	2	5	2	4	10	5	6	11	5	2	2	7	2	1	0	5	1	3	2	4	2	4		11	1	3
M1579	933000000000000	15	M	cocaine	2	0	5	11	15	17	18	14	21	22	10	40	81	88	100	116	106	111	108	112	108	111	113	115	117	114	15	118	20	328		135	30	53
M1580	933000000000000	15	M	cocaine	3	0	2	2	6	2	4	5	3	2	1	2	8	4	4	5	5	2	7	3	5	3	3	3	0	3	0	0	0	0		8	1	1
M1581	933000000000000	15	M	naive	NA	NA	NA	NA	NA	NA	NA	NA	NA	NA	NA	NA	NA	NA	NA	NA	NA	NA	NA	NA	NA	NA	NA	NA	NA	NA	NA	NA	NA	NA	NA	NA	NA	NA
M1582	933000000000000	15	M	naive	NA	NA	NA	NA	NA	NA	NA	NA	NA	NA	NA	NA	NA	NA	NA	NA	NA	NA	NA	NA	NA	NA	NA	NA	NA	NA	NA	NA	NA	NA	NA	NA	NA	NA
M1583	933000000000000	15	M	naive	NA	NA	NA	NA	NA	NA	NA	NA	NA	NA	NA	NA	NA	NA	NA	NA	NA	NA	NA	NA	NA	NA	NA	NA	NA	NA	NA	NA	NA	NA	NA	NA	NA	NA
M1584	933000000000000	15	M	naive	NA	NA	NA	NA	NA	NA	NA	NA	NA	NA	NA	NA	NA	NA	NA	NA	NA	NA	NA	NA	NA	NA	NA	NA	NA	NA	NA	NA	NA	NA	NA	NA	NA	NA
M1585	933000000000000	15	M	naive	NA	NA	NA	NA	NA	NA	NA	NA	NA	NA	NA	NA	NA	NA	NA	NA	NA	NA	NA	NA	NA	NA	NA	NA	NA	NA	NA	NA	NA	NA	NA	NA	NA	NA
M1586	933000000000000	15	M	naive	NA	NA	NA	NA	NA	NA	NA	NA	NA	NA	NA	NA	NA	NA	NA	NA	NA	NA	NA	NA	NA	NA	NA	NA	NA	NA	NA	NA	NA	NA	NA	NA	NA	NA
F1603	933000000000000	16	F	cocaine	1	0	0	0	0	3	2	0	0	0	0	0	0	0	2	3	2	0	0	0	0	0	1	2	1	1	0	0	0	0		22	0
F1604	933000000000000	16	F	cocaine	1	23	7	21	10	13	32	27	45	46	8	25	134	123	124	125	96	99	80	107	116	114	133	125	91	139	4	9	2	4		141	8
F1605	933000000000000	16	F	cocaine	2	0	0	1	1	0	0	1	0	1	0	0	6	35	36	45	79	60	49	66	81	57	87	61	84	97	6	15	1	2		121	14
F1607	933000000000000	16	F	cocaine	2	7	10	20	15	16	22	32	32	36	5	12	98	94	99	83	72	78	62	66	82	106	103	101	98	105	10	40	11	50		105	19
F1608	933000000000000	16	F	cocaine	6	0	0	2	0	35	20	31	37	36	8	25	114	105	105	104	101	98	93	90	111	96	111	117	100	116	6	15	7	20		115	17
F1609	933000000000000	16	F	cocaine	0	2	3	4	8	27	26	38	27	23	7	20	129	108	116	109	79	77	71	90	88	85	79	106	102	119	3	6	1	1		115	7
F1613	933000000000000	16	F	cocaine	5	0	1	5	19	12	7	7	14	7	3	6	23	45	50	53	62	72	61	74	92	98	97	104	113	111	12	62	6	15		112	12
F1614	933000000000000	16	F	cocaine	3	2	3	1	5	2	3	10	43	42	4	9	139	145	154	186	180	182	121	159	185	187	230	229	222	228	12	62	13	77		209	8
F1615	933000000000000	16	F	cocaine	0	0	1	2	0	1	0	1	3	2	1	2	10	7	9	5	24	42	39	43	61	70	72	63	56	48	9	32	10	40		206	0
F1616	933000000000000	16	F	cocaine	41	43	0	3	31	21	21	8	23	27	10	40	69	58	66	66	44	51	45	52	56	62	62	58	57	61	16	145	15	118		67	9
F1617	933000000000000	16	F	cocaine	25	31	33	38	52	53	33	41	46	47	9	32	145	111	111	104	123	146	165	144	148	138	124	171	144	139	6	15	14	95		164	8
F1618	933000000000000	16	F	cocaine	2	0	2	4	2	0	3	2	1	0	1	1	18	45	62	82	92	86	111	115	119	106	108	105	109	113	14	95	17	178		113	14
F1619	933000000000000	16	F	cocaine	3	16	29	26	37	34	25	26	34	40	8	25	102	114	129	121	125	128	66	135	152	130	132	131	139	150	18	219	13	77		222	42
F1621	933000000000000	16	F	cocaine	1	2	2	5	1	2	4	30	29	33	7	20	62	35	78	98	81	106	131	119	151	142	70	130	26	131	13	77	9	32		97	8
F1628	933000000000000	16	F	cocaine	5	3	29	16	7	0	0	0	15	0	0	0	0	0	0	2	43	56	84	139	155	111	125	132	118	129	13	77	6	15		133	36
F1630	933000000000000	16	F	cocaine	25	33	29	33	34	43	40	40	38	34	9	32	75	87	93	92	126	127	123	116	114	111	107	111	110	123	15	118	17	178		116	7
F1632	933000000000000	16	F	cocaine	0	0	0	8	46	0	0	0	0	0	0	0	0	0	0	49	67	22	62	86	87	109	93	91	96	89	3	6	1	2		98	9
F1634	933000000000000	16	F	cocaine	2	2	3	23	21	22	23	17	13	11	2	4	43	36	63	91	88	105	33	97	102	92	75	63	41	124	2	4	5	12		83	8
F1636	933000000000000	16	F	cocaine	1	1	3	3	2	7	16	13	41	25	3	6	42	83	111	69	120	74	124	156	139	132	123	96	92	43	11	50	2	4		16	0
F1637	933000000000000	16	F	cocaine	0	6	1	1	0	0	2	3	17	40	2	4	93	89	101	126	148	135	95	121	142	123	115	136	113	129	7	20	1	1		143	23
M1651	933000000000000	16	M	cocaine	20	15	21	22	23	34	25	28	26	24	10	40	73	74	93	97	106	97	109	100	122	93	91	95	106	115	16	145	13	77		109	12
M1652	933000000000000	16	M	cocaine	20	4	17	17	8	8	8	14	16	17	5	12	55	54	64	107	89	93	65	86	85	82	85	94	98	95	8	25	14	95		93	4
M1653	933000000000000	16	M	cocaine	1	0	3	2	3	1	3	5	2	6	4	6	11	50	41	44	22	74	88	83	77	98	84	85	91	86	10	40	0	0		92	6
M1654	933000000000000	16	M	cocaine	3	4	80	18	6	4	1	32	23	32	9	32	153	124	132	117	110	111	105	101	77	118	123	119	123	113	10	40	8	25		130	3
M1655	933000000000000	16	M	cocaine	1	3	12	38	45	52	44	43	44	46	13	77	0	55	102	110	100	97	110	108	104	112	115	116	111	93	14	95	12	62		148	13
M1656	933000000000000	16	M	cocaine	2	22	0	1	8	28	22	31	31	31	5	12	92	97	109	85	90	93	88	50	113	107	100	104	99	122	5	12	9	32		134	9
M1659	933000000000000	16	M	cocaine	0	0	1	0	0	0	2	1	30	35	4	9	92	103	26	99	89	85	88	95	97	100	106	105	105	115	15	118	14	95		124	24
M1660	933000000000000	16	M	cocaine	2	1	1	7	1	2	3	11	11	13	4	9	62	55	68	83	88	104	98	104	102	82	89	89	95	92	8	25	10	40		28	2
M1661	933000000000000	16	M	cocaine	3	0	5	28	25	13	18	14	16	19	7	20	63	68	85	104	115	91	110	113	114	115	121	112	116	124	4	9	2	4		119	4
M1662	933000000000000	16	M	cocaine	6	22	13	15	9	12	17	10	11	7	4	6	40	63	91	94	63	80	31	105	40	90	82	91	50	116	3	6	12	62		108	6
M1663	933000000000000	16	M	cocaine	0	1	0	0	0	0	0	0	0	0	0	0	33	15	55	45	56	75	79	76	93	87	102	113	80	66	1	1	11	50		43	10
M1664	933000000000000	16	M	cocaine	5	1	0	0	0	0	0	4	0	0	1	1	20	30	20	27	11	9	7	2	6	2	0	1	4	2	2	4	2	2		9	1
M1667	933000000000000	16	M	cocaine	1	2	2	1	1	2	2	6	5	2	1	1	21	35	30	27	36	16	20	20	10	38	27	36	27	43	13	77	7	20		106	12
M1668	933000000000000	16	M	cocaine	10	11	14	5	9	56	41	44	61	46	9	32	106	107	117	115	116	110	107	119	115	122	121	46	22	132	8	25	10	40		32	10
M1669	933000000000000	16	M	cocaine	1	24	13	4	3	3	2	6	4	1	2	2	11	39	61	77	94	90	102	100	101	104	93	105	111	110	8	20	0	0		113	3
M1670	933000000000000	16	M	cocaine	1	3	1	2	0	1	1	1	1	1	0	0	10	6	3	3	4	0	1	3	5	12	6	8	5	3	1	2	0	0		13	9
M1671	933000000000000	16	M	cocaine	0	4	4	3	2	7	10	15	16	17	6	15	46	51	72	63	26	64	71	56	24	29	79	58	58	89	1	2	10	40		97	9
M1673	933000000000000	16	M	cocaine	0	3	4	3	19	12	6	14	19	14	4	9	10	21	23	17	23	34	12	8	2	0	2	1	14	27	2	4	4	9		25	9
M1674	933000000000000	16	M	cocaine	5	19	16	11	17	15	17	13	15	17	2	4	32	18	23	14	17	9	4	5	7	6	9	15	18	10	1	2	0	0		37	9
M1675	933000000000000	16	M	cocaine	2	4	3	0	2	3	1	0	3	1	3	6	15	28	11	21	13	11	35	29	30	19	80	82	99	96	7	20	0	0		96	8
M1676	933000000000000	16	M	cocaine	5	0	4	5	0	0	1	0	1	2	3	6	67	96	103	100	106	102	106	111	110	109	105	97	91	110	2	2	4	9		110	5
M1677	933000000000000	16	M	cocaine	3	3	1	4	2	7	2	3	10	9	1	2	13	33	30	25	53	30	47	50	38	45	51	75	87	92	4	9	10	40		108	4
M1678	933000000000000	16	M	cocaine	27	34	9	21	30	37	42	55	56	46	8	25	153	152	136	127	166	123	167	168	141	151	126	130	105	114	4	9	15	118		122	4
M1679	933000000000000	16	M	cocaine	2	3	0	1	0	1	0	0	1	0	0	0	2	8	143	12	75	1	1	0	0	5	31	62	29	96	3	4	3	4		99	10
M1680	933000000000000	16	M	cocaine	2	2	3	4	3	2	1	2	1	5	0	0	35	24	30	11	19	8	8	6	11	2	34	18	16	26	1	2	0	0		33	3
M1681	933000000000000	16	M	cocaine	2	5	3	2	6	10	14	11	7	11	4	9	40	20	14	26	18	27	36	28	15	7	17	7	11	11	2	4	6	12		51	1
