# Supplementary material for: Large-scale characterization of cocaine addiction-like behaviors reveals that escalation of intake, aversion-resistant responding, and breaking-points are highly correlated measures of the same construct
Source: eLife. 2024 Nov 1;12:RP90422. doi: 10.7554/eLife.90422 (PMC11530236; doi:10.7554/eLife.90422)
Supplement: Figure 4—figure supplement 1—source data 1. — Principal component analysis (PCA) analyses are split by panel. [file elife-90422-fig4-figsupp1-data1.xlsx]

## Sheet: Panel A
split	esc_z_score	pr_z_score	shock_z_score
Resilient	-2.1191	-2.44953	-2.16976
Resilient	-2.9806	-1.81693	-1.16465
Resilient	-2.17745	-1.93365	-1.24287
Resilient	-1.13328	-1.7003	-0.798592
Resilient	-2.964	-1.48362	-1.66618
Resilient	-2.07808	-1.55706	-0.98227
Resilient	-1.82295	-1.38674	-0.945124
Resilient	-1.85336	-1.81733	-1.14506
Vulnerable	-0.946342	-2.47632	-1.17017
Resilient	-1.8896	-1.65513	-0.945084
Resilient	-2.58987	-2.02421	-0.48972
Resilient	-1.82514	-1.74535	-0.721668
Resilient	-1.78181	-1.60407	-1.35015
Resilient	-2.47921	-2.1781	-0.353836
Resilient	-1.4446	-1.08542	-1.24906
Resilient	-1.4446	-1.49612	-1.37163
Resilient	-1.60833	-1.93365	-0.851969
Vulnerable	-1.31071	-2.1781	-1.01014
Vulnerable	-0.872038	-1.81693	-1.01274
Resilient	-1.75618	-1.2221	-0.945124
Resilient	-1.68941	-1.55137	-0.564144
Resilient	-1.42411	-1.7003	-0.798592
Resilient	-1.04344	-1.22928	-0.976294
Resilient	-1.75319	-0.75104	-1.24761
Resilient	-1.78035	-1.44532	-0.945084
Resilient	-1.04344	-1.22928	-0.751591
Vulnerable	-0.757534	-1.52349	-1.1223
Resilient	-1.53755	-0.596628	-0.926275
Resilient	-1.94583	-0.929772	-0.548865
Resilient	-1.05919	-0.964298	0.0854526
Resilient	-1.26456	-1.56733	-0.908123
Resilient	-1.56233	-0.958628	-1.0327
Resilient	-1.42759	-1.29077	-1.00391
Resilient	-1.38061	-0.958628	-1.13912
Resilient	-1.22732	-1.81733	-0.529806
Resilient	-0.779704	-1.38674	-0.754634
Vulnerable	-0.0558569	-1.24855	-1.26738
Resilient	-1.22061	-1.56733	-0.908123
Vulnerable	-0.614161	-1.48362	-1.2663
Resilient	-2.02512	-0.033264	-1.1223
Resilient	-1.81407	-1.34234	-0.679547
Resilient	-1.01272	-1.22928	-1.201
Resilient	-1.9334	-0.780064	-0.747621
Resilient	-1.84278	-1.44532	-0.590677
Resilient	-1.4446	-1.49612	0.344366
Resilient	-1.89907	-1.2055	-0.457578
Resilient	-1.93274	-1.99498	-0.522834
Vulnerable	-0.856913	-1.48362	-0.0666474
Vulnerable	-0.708239	-1.70977	-0.00399394
Resilient	-1.04958	-1.22928	-0.526889
Resilient	-1.92815	-1.2055	-0.822482
Resilient	-1.09496	-1.81733	-0.222177
Resilient	-1.01886	-1.22928	-0.751591
Resilient	-1.93118	-1.24855	0.0498968
Vulnerable	0.982082	-1.23552	-1.12229
Vulnerable	0.249493	-1.70977	-1.06638
Vulnerable	-0.452039	-2.03196	-0.860828
Resilient	-1.90661	-1.7003	-1.03668
Resilient	-1.56233	-0.777628	-1.0327
Resilient	-1.04344	-1.22928	-0.976294
Resilient	-0.860243	-0.777628	-1.0327
Vulnerable	-0.539922	-1.2055	-0.944116
Vulnerable	-0.555011	-0.404046	-1.11102
Resilient	-1.75618	-1.05747	-0.754634
Vulnerable	-0.118368	-1.2055	-0.944116
Vulnerable	-0.682132	-0.792222	-1.66618
Vulnerable	-0.932038	-0.526803	-0.557007
Resilient	-0.945131	-0.837535	-0.751591
Vulnerable	0.0807184	-0.0810456	-1.92898
Vulnerable	-1.17398	-1.12	0.304142
Vulnerable	-0.74184	-1.24608	0.302473
Vulnerable	-1.31329	0.244869	0.333237
Vulnerable	-0.487931	-1.48362	-0.866416
Vulnerable	0.338653	-1.55137	-0.564144
Vulnerable	-0.315096	-0.777628	-0.713429
Resilient	-1.84278	-1.23552	-1.12229
Resilient	-2.14484	-0.033264	-0.954551
Resilient	-1.00657	-0.837535	-0.751591
Resilient	-0.987868	-1.16336	-1.39382
Vulnerable	-0.414806	-1.40794	-0.30936
Resilient	-1.41365	-0.596628	-0.0748903
Resilient	-1.2522	-1.02338	-0.335943
Vulnerable	-0.954714	-1.52349	0.778818
Vulnerable	-0.584679	-0.447447	-0.441458
Vulnerable	-0.248147	0.146679	-0.636201
Vulnerable	-1.16487	0.0102752	-0.716537
Resilient	-0.888202	0.424253	-0.945124
Resilient	-0.791529	-0.837535	0.596624
Resilient	-1.51827	1.31699	-0.878883
Resilient	-1.04735	-0.447447	-1.03668
Vulnerable	-0.39283	-0.610993	-0.30936
Vulnerable	-0.305492	-0.606103	-0.76788
Vulnerable	-0.495387	0.504733	-1.38713
Vulnerable	-0.808363	0.590566	-0.666474
Vulnerable	-0.246326	1.19337	-1.16465
Vulnerable	-0.479661	0.528509	-0.427263
Resilient	-1.51503	-0.186493	-0.413474
Resilient	-1.82295	-1.55137	-1.13561
Resilient	-0.98814	-0.445785	-0.302186
Resilient	-1.68103	-0.841252	-0.700847
Vulnerable	0.36921	-0.964655	-0.50723
Vulnerable	-0.217909	-0.215779	-0.149493
Vulnerable	-0.614896	0.548305	-0.405096
Resilient	-1.28583	-0.264022	0.95722
Vulnerable	-0.340611	0.333284	-0.708918
Vulnerable	0.872794	-0.0696534	-0.564144
Vulnerable	0.410065	0.277782	-1.69921
Vulnerable	-0.0452607	0.424253	-0.564144
Vulnerable	0.379065	-1.55706	-0.721668
Vulnerable	-0.641535	-0.17677	-1.11102
Vulnerable	-0.67075	-0.659125	-0.700847
Vulnerable	0.339528	0.797888	-0.700847
Vulnerable	0.192187	0.151961	-1.14141
Vulnerable	0.749528	-1.47908	0.302473
Resilient	-1.01886	-1.03341	-0.302186
Resilient	-1.47147	-0.777628	-0.607006
Vulnerable	-0.636758	0.688438	-1.17017
Vulnerable	-0.0462769	0.339293	-0.73089
Vulnerable	0.729054	-0.441833	-1.17017
Vulnerable	-0.180147	-1.02338	-0.822482
Vulnerable	0.450446	-0.537782	-0.32472
Resilient	-1.38249	-0.615581	-0.330764
Vulnerable	0.193931	-1.44532	0.118135
Vulnerable	0.291746	0.525571	-1.01047
Vulnerable	0.333896	-0.23899	-0.591366
Vulnerable	1.60863	-1.33721	-1.01047
Vulnerable	0.123941	0.141841	-0.0774836
Vulnerable	-0.272542	-0.215779	0.530959
Vulnerable	0.496589	-1.31315	0.771181
Vulnerable	0.146307	-0.667888	-0.0360846
Vulnerable	0.474155	0.729466	-0.751591
Resilient	-1.63323	0.505057	0.771181
Vulnerable	-0.321099	0.442921	-0.945084
Resilient	-1.45027	-1.29077	0.099224
Vulnerable	0.499428	1.16214	-0.335943
Resilient	-0.85297	-1.03341	0.596624
Vulnerable	0.628894	0.688438	-0.716537
Vulnerable	0.739259	0.0949819	-1.3261
Resilient	-0.152543	-0.64166	0.371921
Vulnerable	-0.472506	-0.111265	0.0854526
Vulnerable	0.0152959	-0.415629	0.563648
Vulnerable	1.08009	-0.0810456	-1.40393
Vulnerable	-0.428553	0.277782	0.182992
Vulnerable	1.12394	-1.13792	-0.0666474
Vulnerable	0.535664	0.851369	-0.607006
Vulnerable	-0.214538	-0.268468	0.868035
Vulnerable	1.06012	0.233116	-0.0590677
Vulnerable	0.334063	0.0894894	-0.679547
Vulnerable	-0.623468	0.333284	-0.860828
Vulnerable	-0.17468	0.670369	-0.819852
Vulnerable	-0.118948	0.0720202	-0.466531
Vulnerable	0.758678	-0.596628	0.350802
Vulnerable	-0.108601	-0.958628	0.457225
Vulnerable	0.29054	0.968079	-0.268488
Vulnerable	-0.325558	-0.23899	-0.0701621
Vulnerable	1.49407	0.729466	-0.0774836
Vulnerable	0.403592	-0.0810456	-0.485098
Vulnerable	-0.107618	0.315251	-0.734892
Vulnerable	0.198392	0.514192	0.19044
Vulnerable	0.993351	0.137601	-0.98227
Vulnerable	0.0734395	0.153014	0.163751
Vulnerable	0.219093	-0.547058	-0.747621
Vulnerable	-0.272542	0.462384	-0.48972
Vulnerable	0.189359	0.137601	-0.721668
Vulnerable	0.901189	0.528509	-0.734892
Vulnerable	0.740174	0.0233116	-0.945084
Vulnerable	0.622972	0.325896	-0.98227
Vulnerable	-0.342092	1.08398	-0.0913125
Vulnerable	0.99596	-0.964655	1.28205
Vulnerable	-0.254196	0.984384	-0.798592
Vulnerable	1.01635	1.17343	-1.37163
Vulnerable	-0.240977	2.41621	-1.15573
Vulnerable	0.222512	0.0265649	-0.0698556
Vulnerable	0.10078	0.462384	-0.376311
Vulnerable	0.546946	-0.215779	0.304142
Vulnerable	0.162258	-0.427286	-0.330764
Vulnerable	0.33653	0.333284	-0.253185
Vulnerable	-0.651901	1.08441	-1.1223
Vulnerable	0.906446	0.615762	-0.700847
Vulnerable	1.0211	0.233116	-0.945084
Vulnerable	0.638729	1.07234	-0.590677
Vulnerable	-0.445544	1.3666	-0.603129
Resilient	-0.480292	0.12737	-0.819852
Vulnerable	0.436687	0.732333	0.535905
Vulnerable	-0.00353098	0.588888	0.388307
Vulnerable	-0.0245665	-0.606103	-0.413474
Vulnerable	0.632006	0.325896	0.060139
Vulnerable	-0.0705079	0.664123	-0.189608
Vulnerable	0.0169926	0.417717	-1.06636
Vulnerable	1.81989	-1.33721	-0.61906
Vulnerable	0.428982	0.315251	-0.529806
Vulnerable	0.6926	-0.415629	0.0315328
Vulnerable	0.483076	-0.619374	-0.866416
Vulnerable	0.672022	1.27068	-0.954551
Vulnerable	-0.350214	-0.880072	-0.881343
Vulnerable	0.740409	1.07908	-0.591366
Vulnerable	0.131503	0.862531	0.472542
Vulnerable	0.436687	0.277782	0.30063
Resilient	-1.31994	-1.02571	1.18135
Vulnerable	0.259744	0.763414	0.333237
Vulnerable	0.991689	0.0265649	0.0498968
Vulnerable	-0.211405	0.617973	-0.0913125
Vulnerable	-0.00745277	0.315251	1.11088
Vulnerable	1.68378	0.489369	-0.819852
Vulnerable	0.163388	0.753523	0.388307
Vulnerable	0.931215	0.259617	-0.373654
Vulnerable	0.890328	0.711849	-0.954551
Vulnerable	0.568703	-0.958628	0.0315328
Vulnerable	1.16229	0.533591	-0.976294
Vulnerable	0.833816	1.28214	-0.236271
Vulnerable	0.646533	0.862531	0.649745
Vulnerable	-0.0820267	0.433635	-0.822482
Vulnerable	0.881188	-0.273677	-0.266589
Vulnerable	0.631497	0.626426	0.153766
Vulnerable	0.638107	-0.0894894	1.82039
Vulnerable	0.214282	0.898127	0.331497
Vulnerable	0.882576	1.75637	-0.819852
Vulnerable	1.06171	-0.469372	0.95722
Vulnerable	-0.458759	1.14229	0.888164
Vulnerable	0.655799	0.259617	-0.183164
Vulnerable	-0.492144	-0.0894894	1.34421
Vulnerable	0.271885	-0.0696534	0.388307
Vulnerable	-0.67318	0.462384	1.32482
Vulnerable	-0.138368	0.417717	0.333237
Vulnerable	0.602411	1.17343	-0.881343
Vulnerable	0.155602	0.626426	0.629945
Vulnerable	-0.180655	1.55	-0.485098
Vulnerable	0.27062	0.711849	0.275582
Vulnerable	-0.208121	0.702487	1.23285
Vulnerable	0.20848	-0.0894894	1.10612
Resilient	-0.545765	1.90472	-0.0774836
Vulnerable	-0.41996	1.45481	0.733121
Vulnerable	0.396753	0.732333	-0.993385
Vulnerable	0.677174	0.702487	-0.721668
Vulnerable	-0.306326	1.40839	0.50637
Vulnerable	0.0750652	0.352029	0.344366
Vulnerable	0.597377	0.424253	-0.373654
Vulnerable	0.228256	-1.12	-1.28358
Vulnerable	0.348083	0.711849	0.946563
Vulnerable	0.0945659	0.525571	0.611072
Vulnerable	0.822488	0.741768	0.0854526
Vulnerable	1.1382	0.0265649	-0.548865
Vulnerable	0.704275	0.890782	-0.721668
Vulnerable	-0.872038	0.548305	0.50637
Vulnerable	0.43038	0.251508	-0.457578
Vulnerable	0.772523	0.146679	-0.268488
Vulnerable	0.41221	1.52639	-0.457578
Vulnerable	0.139307	1.28214	0.649745
Vulnerable	0.979385	-1.38689	-1.01274
Vulnerable	0.949158	-1.13792	1.73283
Vulnerable	0.769472	-0.17677	0.888819
Vulnerable	0.647453	0.424253	0.197817
Vulnerable	1.33756	0.0720202	1.133
Vulnerable	0.840568	0.762729	-0.51363
Vulnerable	0.882576	-0.958628	1.94715
Vulnerable	0.396821	1.07234	-0.590677
Vulnerable	0.980152	0.617973	0.696258
Vulnerable	0.350001	0.442921	0.118135
Vulnerable	1.19645	0.489369	0.776494
Vulnerable	0.171291	0.514192	0.711644
Vulnerable	1.39736	-0.778377	-0.00399394
Vulnerable	0.903783	0.504733	1.48693
Vulnerable	1.33001	0.236329	0.530959
Vulnerable	0.543179	0.732333	0.653543
Vulnerable	0.542243	0.548305	0.050637
Vulnerable	0.86484	0.384967	0.696258
Vulnerable	1.02147	0.984384	0.153766
Vulnerable	1.05653	0.333284	0.354459
Vulnerable	0.530183	0.185954	-1.26738
Vulnerable	0.698669	0.823512	-0.429113
Vulnerable	-0.0269061	0.384967	0.564996
Vulnerable	-0.478221	0.936263	-0.0666474
Vulnerable	0.129777	1.45696	1.00248
Vulnerable	0.156582	-1.08916	1.12767
Vulnerable	0.381214	0.652726	0.826948
Vulnerable	0.742849	1.18688	0.418268
Vulnerable	1.42034	0.729466	0.371921
Resilient	-1.66597	0.339293	2.34444
Vulnerable	-0.61992	1.93924	1.48693
Vulnerable	0.525101	0.333284	1.26592
Vulnerable	0.769472	0.277782	1.00646
Vulnerable	0.972736	0.955026	0.290539
Vulnerable	0.0502121	0.925341	-1.201
Vulnerable	1.00093	0.433635	1.61021
Vulnerable	0.716117	0.417717	0.333237
Vulnerable	0.737252	0.447447	-0.322413
Vulnerable	1.09133	0.862531	0.472542
Vulnerable	0.704478	-0.674722	1.4475
Vulnerable	0.979891	0.741768	0.905797
Vulnerable	-0.0755619	0.30837	1.41503
Vulnerable	0.141931	-0.292214	-1.02787
Vulnerable	0.455819	-1.2055	0.637134
Vulnerable	0.228367	0.711849	1.17022
Vulnerable	0.750471	0.805405	0.0347214
Vulnerable	0.959538	1.12122	0.596624
Vulnerable	0.902493	0.447447	-0.679547
Vulnerable	1.4525	1.57537	0.350802
Vulnerable	0.00972624	1.14055	-0.149493
Vulnerable	0.903277	0.384967	0.958781
Vulnerable	0.188426	1.24743	0.197817
Vulnerable	1.30858	0.0505057	0.888819
Vulnerable	1.04791	0.447447	0.868035
Vulnerable	0.288651	0.615762	0.880403
Vulnerable	0.650073	1.64396	-0.0701621
Vulnerable	0.0540255	1.14229	0.648659
Vulnerable	0.517163	0.337716	2.16954
Vulnerable	0.89559	0.151961	0.82752
Vulnerable	0.717423	-0.0894894	-0.0843234
Vulnerable	1.06575	0.741768	-0.427263
Vulnerable	0.467053	-0.186493	-0.0590677
Vulnerable	0.593482	1.93737	0.563648
Vulnerable	0.163972	-0.415629	1.30861
Vulnerable	0.893981	0.514192	1.75405
Vulnerable	0.583367	0.914492	0.984595
Vulnerable	0.398324	0.504733	0.888164
Vulnerable	0.0483352	1.21337	-0.607006
Vulnerable	0.848813	0.325896	1.49345
Vulnerable	0.749842	0.762729	1.07979
Vulnerable	-0.546191	1.45481	-0.466531
Vulnerable	1.07367	0.763327	0.658281
Vulnerable	0.97797	1.12122	-0.526889
Vulnerable	1.18948	0.664123	-0.429113
Vulnerable	1.01132	0.236329	1.55164
Vulnerable	0.638729	-0.606103	2.42178
Vulnerable	0.70763	0.141841	0.371921
Vulnerable	0.739278	0.433635	1.00204
Vulnerable	1.4551	-0.0967598	1.72166
Vulnerable	0.149906	0.151961	2.14014
Vulnerable	0.859385	0.548305	1.41784
Vulnerable	0.44715	-0.234289	2.10272
Vulnerable	0.560172	0.337716	1.94484
Vulnerable	0.506696	1.16214	1.73185
Vulnerable	0.55649	0.277782	0.30063
Vulnerable	1.30185	0.528509	1.6236
Vulnerable	1.03137	0.0949819	0.959777
Vulnerable	0.987999	-0.100828	0.333237
Vulnerable	2.38353	0.664123	0.528907
Vulnerable	0.57973	1.58413	0.221795
Vulnerable	0.587516	0.898127	0.0519212
Vulnerable	1.0731	0.753523	0.197817
Vulnerable	0.335971	0.101993	1.72614
Vulnerable	1.53702	0.447447	0.629945
Vulnerable	-0.126818	-0.0506949	0.581343
Vulnerable	0.365607	0.862531	1.35856
Vulnerable	0.929738	0.590566	1.33295
Vulnerable	2.48942	0.729466	-0.0774836
Vulnerable	1.17512	-0.0586715	1.81522
Vulnerable	0.0354752	0.528509	1.00834
Vulnerable	1.23384	0.850979	1.61509
Vulnerable	0.434525	0.936263	0.733121
Vulnerable	0.775215	1.12122	-0.0774836
Vulnerable	0.35028	0.528509	2.23886
Vulnerable	1.01068	1.17343	1.57007
Resilient	-1.38428	0.898127	2.12078
Vulnerable	1.04755	0.702487	0.581343
Vulnerable	0.319915	0.525571	0.163751
Vulnerable	0.714221	0.588888	2.10272
Vulnerable	0.240679	0.925341	1.72014
Vulnerable	0.964599	0.259617	0.959777
Vulnerable	1.41805	0.805405	2.29657
Vulnerable	-0.50623	0.702487	1.75405
Vulnerable	1.30843	1.62766	2.13272
Vulnerable	0.547302	2.39988	-0.183164
Vulnerable	1.33762	1.5948	0.495625
Vulnerable	0.380383	1.08279	2.29321
Vulnerable	0.061351	1.14229	2.44495
Vulnerable	0.472779	0.617973	0.171211
Vulnerable	1.328	0.797888	1.61021
Vulnerable	1.20254	1.14055	0.304142
Vulnerable	1.44429	1.34427	1.73185
Vulnerable	0.443343	1.18688	0.888819
Vulnerable	0.993351	1.07908	2.27526
Vulnerable	1.87634	0.688438	2.68573
Vulnerable	0.518904	0.384967	1.09004
Vulnerable	0.560172	1.51297	2.39424
Vulnerable	0.763585	1.49195	2.42178
Vulnerable	1.23775	2.11837	2.58569

## Sheet: Panel B
sex	esc_z_score	pr_z_score	shock_z_score	irr_z_score
F	-2.1191	-2.44953	-2.16976	-0.758894
M	-2.9806	-1.81693	-1.16465	-1.23246
M	-2.17745	-1.93365	-1.24287	-0.83234
F	-1.13328	-1.7003	-0.798592	-2.25644
F	-2.964	-1.48362	-1.66618	0.465938
M	-2.07808	-1.55706	-0.98227	-0.986651
M	-1.82295	-1.38674	-0.945124	-1.39251
F	-1.85336	-1.81733	-1.14506	-0.727714
F	-0.946342	-2.47632	-1.17017	-0.649234
M	-1.8896	-1.65513	-0.945084	-0.740292
F	-2.58987	-2.02421	-0.48972	-0.106836
M	-1.82514	-1.74535	-0.721668	-0.909496
F	-1.78181	-1.60407	-1.35015	-0.435002
F	-2.47921	-2.1781	-0.353836	-0.120397
M	-1.4446	-1.08542	-1.24906	-1.04387
M	-1.4446	-1.49612	-1.37163	-0.416651
M	-1.60833	-1.93365	-0.851969	-0.137944
F	-1.31071	-2.1781	-1.01014	-0.0300993
M	-0.872038	-1.81693	-1.01274	-0.728873
M	-1.75618	-1.2221	-0.945124	-0.445966
M	-1.68941	-1.55137	-0.564144	-0.518777
F	-1.42411	-1.7003	-0.798592	-0.36366
M	-1.04344	-1.22928	-0.976294	-0.941997
F	-1.75319	-0.75104	-1.24761	-0.435002
M	-1.78035	-1.44532	-0.945084	-0.0122565
M	-1.04344	-1.22928	-0.751591	-1.14485
F	-0.757534	-1.52349	-1.1223	-0.67599
M	-1.53755	-0.596628	-0.926275	-0.995639
F	-1.94583	-0.929772	-0.548865	-0.619552
F	-1.05919	-0.964298	0.0854526	-2.0937
F	-1.26456	-1.56733	-0.908123	-0.273496
M	-1.56233	-0.958628	-1.0327	-0.410631
M	-1.42759	-1.29077	-1.00391	-0.237446
M	-1.38061	-0.958628	-1.13912	-0.447194
F	-1.22732	-1.81733	-0.529806	-0.337432
M	-0.779704	-1.38674	-0.754634	-0.955642
F	-0.0558569	-1.24855	-1.26738	-1.22515
F	-1.22061	-1.56733	-0.908123	-0.100468
F	-0.614161	-1.48362	-1.2663	-0.39691
F	-2.02512	-0.033264	-1.1223	-0.565037
F	-1.81407	-1.34234	-0.679547	0.109536
M	-1.01272	-1.22928	-1.201	-0.265811
F	-1.9334	-0.780064	-0.747621	-0.120397
M	-1.84278	-1.44532	-0.590677	0.311315
M	-1.4446	-1.49612	0.344366	-0.954264
M	-1.89907	-1.2055	-0.457578	0.0156928
F	-1.93274	-1.99498	-0.522834	0.918661
F	-0.856913	-1.48362	-0.0666474	-1.08719
F	-0.708239	-1.70977	-0.00399394	-1.06432
M	-1.04958	-1.22928	-0.526889	-0.671523
M	-1.92815	-1.2055	-0.822482	0.542972
F	-1.09496	-1.81733	-0.222177	-0.142291
M	-1.01886	-1.22928	-0.751591	-0.265811
F	-1.93118	-1.24855	0.0498968	-0.0139539
M	0.982082	-1.23552	-1.12229	-1.63011
F	0.249493	-1.70977	-1.06638	-0.454084
M	-0.452039	-2.03196	-0.860828	0.404193
F	-1.90661	-1.7003	-1.03668	1.76572
M	-1.56233	-0.777628	-1.0327	0.503445
M	-1.04344	-1.22928	-0.976294	0.410375
M	-0.860243	-0.777628	-1.0327	-0.15469
M	-0.539922	-1.2055	-0.944116	-0.0721871
F	-0.555011	-0.404046	-1.11102	-0.639068
M	-1.75618	-1.05747	-0.754634	0.864628
M	-0.118368	-1.2055	-0.944116	-0.335827
F	-0.682132	-0.792222	-1.66618	0.552222
M	-0.932038	-0.526803	-0.557007	-0.540028
M	-0.945131	-0.837535	-0.751591	0.00466335
F	0.0807184	-0.0810456	-1.92898	-0.571886
F	-1.17398	-1.12	0.304142	-0.468435
F	-0.74184	-1.24608	0.302473	-0.752482
F	-1.31329	0.244869	0.333237	-1.69118
F	-0.487931	-1.48362	-0.866416	0.465938
M	0.338653	-1.55137	-0.564144	-0.591588
M	-0.315096	-0.777628	-0.713429	-0.556883
M	-1.84278	-1.23552	-1.12229	1.84828
F	-2.14484	-0.033264	-0.954551	0.821872
M	-1.00657	-0.837535	-0.751591	0.342756
F	-0.987868	-1.16336	-1.39382	1.29253
F	-0.414806	-1.40794	-0.30936	-0.100468
M	-1.41365	-0.596628	-0.0748903	-0.118127
M	-1.2522	-1.02338	-0.335943	0.455092
F	-0.954714	-1.52349	0.778818	-0.398608
F	-0.584679	-0.447447	-0.441458	-0.600258
M	-0.248147	0.146679	-0.636201	-1.31267
F	-1.16487	0.0102752	-0.716537	-0.106836
M	-0.888202	0.424253	-0.945124	-0.518777
M	-0.791529	-0.837535	0.596624	-0.80676
F	-1.51827	1.31699	-0.878883	-0.752482
F	-1.04735	-0.447447	-1.03668	0.701031
F	-0.39283	-0.610993	-0.30936	-0.446524
M	-0.305492	-0.606103	-0.76788	-0.0122565
F	-0.495387	0.504733	-1.38713	-0.273496
F	-0.808363	0.590566	-0.666474	-0.655764
M	-0.246326	1.19337	-1.16465	-1.29541
F	-0.479661	0.528509	-0.427263	-1.118
M	-1.51503	-0.186493	-0.413474	0.634886
M	-1.82295	-1.55137	-1.13561	3.04895
M	-0.98814	-0.445785	-0.302186	0.275138
M	-1.68103	-0.841252	-0.700847	1.77329
F	0.36921	-0.964655	-0.50723	-0.343131
F	-0.217909	-0.215779	-0.149493	-0.830034
M	-0.614896	0.548305	-0.405096	-0.917717
M	-1.28583	-0.264022	0.95722	-0.77506
M	-0.340611	0.333284	-0.708918	-0.602976
M	0.872794	-0.0696534	-0.564144	-1.53813
F	0.410065	0.277782	-1.69921	-0.279592
M	-0.0452607	0.424253	-0.564144	-1.10126
M	0.379065	-1.55706	-0.721668	0.633607
F	-0.641535	-0.17677	-1.11102	0.67901
M	-0.67075	-0.659125	-0.700847	0.806612
M	0.339528	0.797888	-0.700847	-1.65403
F	0.192187	0.151961	-1.14141	-0.391291
F	0.749528	-1.47908	0.302473	-0.752482
M	-1.01886	-1.03341	-0.302186	1.2218
M	-1.47147	-0.777628	-0.607006	1.74659
F	-0.636758	0.688438	-1.17017	0.0136969
F	-0.0462769	0.339293	-0.73089	-0.620513
F	0.729054	-0.441833	-1.17017	-0.167102
M	-0.180147	-1.02338	-0.822482	0.982372
F	0.450446	-0.537782	-0.32472	-0.630144
M	-1.38249	-0.615581	-0.330764	1.328
M	0.193931	-1.44532	0.118135	0.149529
F	0.291746	0.525571	-1.01047	-0.786942
M	0.333896	-0.23899	-0.591366	-0.446565
F	1.60863	-1.33721	-1.01047	-0.176702
M	0.123941	0.141841	-0.0774836	-1.07723
F	-0.272542	-0.215779	0.530959	-0.8903
F	0.496589	-1.31315	0.771181	-0.758894
F	0.146307	-0.667888	-0.0360846	-0.227369
M	0.474155	0.729466	-0.751591	-1.21247
F	-1.63323	0.505057	0.771181	-0.399418
M	-0.321099	0.442921	-0.945084	0.0686363
M	-1.45027	-1.29077	0.099224	1.91301
M	0.499428	1.16214	-0.335943	-2.00554
M	-0.85297	-1.03341	0.596624	0.613231
F	0.628894	0.688438	-0.716537	-1.2519
M	0.739259	0.0949819	-1.3261	-0.154723
M	-0.152543	-0.64166	0.371921	-0.130574
F	-0.472506	-0.111265	0.0854526	-0.0447199
M	0.0152959	-0.415629	0.563648	-0.703135
F	1.08009	-0.0810456	-1.40393	-0.120397
F	-0.428553	0.277782	0.182992	-0.519243
F	1.12394	-1.13792	-0.0666474	-0.39691
M	0.535664	0.851369	-0.607006	-1.25158
F	-0.214538	-0.268468	0.868035	-0.836856
M	1.06012	0.233116	-0.0590677	-1.63011
F	0.334063	0.0894894	-0.679547	-0.127062
M	-0.623468	0.333284	-0.860828	0.781881
M	-0.17468	0.670369	-0.819852	-0.00843762
F	-0.118948	0.0720202	-0.466531	0.207083
M	0.758678	-0.596628	0.350802	-0.812824
M	-0.108601	-0.958628	0.457225	0.357193
M	0.29054	0.968079	-0.268488	-1.22307
M	-0.325558	-0.23899	-0.0701621	0.402142
M	1.49407	0.729466	-0.0774836	-2.36199
F	0.403592	-0.0810456	-0.485098	-0.0300993
F	-0.107618	0.315251	-0.734892	0.345563
M	0.198392	0.514192	0.19044	-1.06381
M	0.993351	0.137601	-0.98227	-0.292254
F	0.0734395	0.153014	0.163751	-0.50956
F	0.219093	-0.547058	-0.747621	0.963177
F	-0.272542	0.462384	-0.48972	0.194496
M	0.189359	0.137601	-0.721668	0.324987
F	0.901189	0.528509	-0.734892	-0.727714
M	0.740174	0.0233116	-0.945084	0.149529
M	0.622972	0.325896	-0.98227	0.0163662
F	-0.342092	1.08398	-0.0913125	-0.662184
F	0.99596	-0.964655	1.28205	-1.28623
F	-0.254196	0.984384	-0.798592	0.109536
M	1.01635	1.17343	-1.37163	-0.77506
F	-0.240977	2.41621	-1.15573	-0.955155
F	0.222512	0.0265649	-0.0698556	-0.100468
F	0.10078	0.462384	-0.376311	-0.106836
F	0.546946	-0.215779	0.304142	-0.528701
M	0.162258	-0.427286	-0.330764	0.710763
M	0.33653	0.333284	-0.253185	-0.288236
F	-0.651901	1.08441	-1.1223	0.821872
M	0.906446	0.615762	-0.700847	-0.687346
M	1.0211	0.233116	-0.945084	-0.174042
M	0.638729	1.07234	-0.590677	-0.98297
F	-0.445544	1.3666	-0.603129	-0.167102
M	-0.480292	0.12737	-0.819852	1.38096
F	0.436687	0.732333	0.535905	-1.47785
M	-0.00353098	0.588888	0.388307	-0.737209
M	-0.0245665	-0.606103	-0.413474	1.28203
M	0.632006	0.325896	0.060139	-0.755185
F	-0.0705079	0.664123	-0.189608	-0.100468
F	0.0169926	0.417717	-1.06636	0.983646
F	1.81989	-1.33721	-0.61906	0.489014
F	0.428982	0.315251	-0.529806	0.150421
M	0.6926	-0.415629	0.0315328	0.0646884
F	0.483076	-0.619374	-0.866416	1.41507
F	0.672022	1.27068	-0.954551	-0.565037
M	-0.350214	-0.880072	-0.881343	2.54022
M	0.740409	1.07908	-0.591366	-0.755185
M	0.131503	0.862531	0.472542	-0.98297
F	0.436687	0.277782	0.30063	-0.519243
M	-1.31994	-1.02571	1.18135	1.68649
F	0.259744	0.763414	0.333237	-0.828334
F	0.991689	0.0265649	0.0498968	-0.533038
F	-0.211405	0.617973	-0.0913125	0.240794
F	-0.00745277	0.315251	1.11088	-0.825285
M	1.68378	0.489369	-0.819852	-0.739698
M	0.163388	0.753523	0.388307	-0.664398
M	0.931215	0.259617	-0.373654	-0.154723
F	0.890328	0.711849	-0.954551	0.0452029
M	0.568703	-0.958628	0.0315328	1.05189
M	1.16229	0.533591	-0.976294	0.00466335
M	0.833816	1.28214	-0.236271	-1.14476
M	0.646533	0.862531	0.649745	-1.38743
M	-0.0820267	0.433635	-0.822482	1.24601
F	0.881188	-0.273677	-0.266589	0.465938
F	0.631497	0.626426	0.153766	-0.600258
F	0.638107	-0.0894894	1.82039	-1.54665
F	0.214282	0.898127	0.331497	-0.620513
M	0.882576	1.75637	-0.819852	-0.959076
M	1.06171	-0.469372	0.95722	-0.685457
F	-0.458759	1.14229	0.888164	-0.706066
M	0.655799	0.259617	-0.183164	0.13652
F	-0.492144	-0.0894894	1.34421	0.109536
M	0.271885	-0.0696534	0.388307	0.282142
F	-0.67318	0.462384	1.32482	-0.227369
F	-0.138368	0.417717	0.333237	0.293368
M	0.602411	1.17343	-0.881343	0.0313608
F	0.155602	0.626426	0.629945	-0.481959
F	-0.180655	1.55	-0.485098	0.0601986
F	0.27062	0.711849	0.275582	-0.287655
M	-0.208121	0.702487	1.23285	-0.755185
F	0.20848	-0.0894894	1.10612	-0.245361
M	-0.545765	1.90472	-0.0774836	-0.265811
F	-0.41996	1.45481	0.733121	-0.742049
F	0.396753	0.732333	-0.993385	0.918661
M	0.677174	0.702487	-0.721668	0.402142
M	-0.306326	1.40839	0.50637	-0.540028
M	0.0750652	0.352029	0.344366	0.300168
M	0.597377	0.424253	-0.373654	0.427763
F	0.228256	-1.12	-1.28358	3.26809
F	0.348083	0.711849	0.946563	-0.897895
F	0.0945659	0.525571	0.611072	-0.121226
F	0.822488	0.741768	0.0854526	-0.532573
F	1.1382	0.0265649	-0.548865	0.50513
M	0.704275	0.890782	-0.721668	0.247832
M	-0.872038	0.548305	0.50637	0.970726
M	0.43038	0.251508	-0.457578	0.982372
M	0.772523	0.146679	-0.268488	0.568974
M	0.41221	1.52639	-0.457578	-0.247947
M	0.139307	1.28214	0.649745	-0.821184
M	0.979385	-1.38689	-1.01274	2.73327
F	0.949158	-1.13792	1.73283	-0.22434
F	0.769472	-0.17677	0.888819	-0.159767
M	0.647453	0.424253	0.197817	0.0637094
F	1.33756	0.0720202	1.133	-1.17347
M	0.840568	0.762729	-0.51363	0.300168
M	0.882576	-0.958628	1.94715	-0.447194
M	0.396821	1.07234	-0.590677	0.553993
F	0.980152	0.617973	0.696258	-0.84278
M	0.350001	0.442921	0.118135	0.553993
M	1.19645	0.489369	0.776494	-0.995639
M	0.171291	0.514192	0.711644	0.0935214
F	1.39736	-0.778377	-0.00399394	0.877348
F	0.903783	0.504733	1.48693	-1.39818
F	1.33001	0.236329	0.530959	-0.588968
F	0.543179	0.732333	0.653543	-0.399418
M	0.542243	0.548305	0.050637	0.404193
F	0.86484	0.384967	0.696258	-0.391291
F	1.02147	0.984384	0.153766	-0.600258
M	1.05653	0.333284	0.354459	-0.16234
F	0.530183	0.185954	-1.26738	2.1489
F	0.698669	0.823512	-0.429113	0.50513
F	-0.0269061	0.384967	0.564996	0.692284
F	-0.478221	0.936263	-0.0666474	1.2425
F	0.129777	1.45696	1.00248	-0.953371
F	0.156582	-1.08916	1.12767	1.45678
M	0.381214	0.652726	0.826948	-0.174042
F	0.742849	1.18688	0.418268	-0.639068
M	1.42034	0.729466	0.371921	-0.80676
F	-1.66597	0.339293	2.34444	0.710919
F	-0.61992	1.93924	1.48693	-1.05212
M	0.525101	0.333284	1.26592	-0.351184
F	0.769472	0.277782	1.00646	-0.279592
F	0.972736	0.955026	0.290539	-0.435002
M	0.0502121	0.925341	-1.201	2.03322
M	1.00093	0.433635	1.61021	-1.21463
F	0.716117	0.417717	0.333237	0.379653
F	0.737252	0.447447	-0.322413	1.05593
M	1.09133	0.862531	0.472542	-0.497613
M	0.704478	-0.674722	1.4475	0.479372
F	0.979891	0.741768	0.905797	-0.630144
M	-0.0755619	0.30837	1.41503	0.357193
F	0.141931	-0.292214	-1.02787	3.18706
M	0.455819	-1.2055	0.637134	2.12481
F	0.228367	0.711849	1.17022	-0.0657497
F	0.750471	0.805405	0.0347214	0.464433
M	0.959538	1.12122	0.596624	-0.603904
F	0.902493	0.447447	-0.679547	1.41083
M	1.4525	1.57537	0.350802	-1.28814
F	0.00972624	1.14055	-0.149493	1.09849
F	0.903277	0.384967	0.958781	-0.120397
M	0.188426	1.24743	0.197817	0.573385
F	1.30858	0.0505057	0.888819	-0.0399418
F	1.04791	0.447447	0.868035	-0.127062
M	0.288651	0.615762	0.880403	0.455092
M	0.650073	1.64396	-0.0701621	0.0163662
F	0.0540255	1.14229	0.648659	0.418616
M	0.517163	0.337716	2.16954	-0.739141
F	0.89559	0.151961	0.82752	0.42139
F	0.717423	-0.0894894	-0.0843234	1.76572
F	1.06575	0.741768	-0.427263	0.930987
M	0.467053	-0.186493	-0.0590677	2.09096
M	0.593482	1.93737	0.563648	-0.739698
M	0.163972	-0.415629	1.30861	1.34439
M	0.893981	0.514192	1.75405	-0.755185
F	0.583367	0.914492	0.984595	-0.0465695
F	0.398324	0.504733	0.888164	0.678158
M	0.0483352	1.21337	-0.607006	1.81971
M	0.848813	0.325896	1.49345	-0.137944
M	0.749842	0.762729	1.07979	-0.0582415
F	-0.546191	1.45481	-0.466531	2.10535
M	1.07367	0.763327	0.658281	0.0894525
M	0.97797	1.12122	-0.526889	1.01894
F	1.18948	0.664123	-0.429113	1.19724
F	1.01132	0.236329	1.55164	-0.167102
M	0.638729	-0.606103	2.42178	0.230422
M	0.70763	0.141841	0.371921	1.49227
M	0.739278	0.433635	1.00204	0.542972
M	1.4551	-0.0967598	1.72166	-0.351184
F	0.149906	0.151961	2.14014	0.331092
M	0.859385	0.548305	1.41784	-0.0364436
M	0.44715	-0.234289	2.10272	0.500574
M	0.560172	0.337716	1.94484	0.00466335
M	0.506696	1.16214	1.73185	-0.511587
F	0.55649	0.277782	0.30063	1.87726
F	1.30185	0.528509	1.6236	-0.435002
M	1.03137	0.0949819	0.959777	0.937439
F	0.987999	-0.100828	0.333237	1.84649
F	2.38353	0.664123	0.528907	-0.446524
M	0.57973	1.58413	0.221795	0.837781
F	0.587516	0.898127	0.0519212	1.70949
M	1.0731	0.753523	0.197817	1.22868
F	0.335971	0.101993	1.72614	1.12613
F	1.53702	0.447447	0.629945	0.701031
M	-0.126818	-0.0506949	0.581343	2.94826
M	0.365607	0.862531	1.35856	0.796671
F	0.929738	0.590566	1.33295	0.552222
M	2.48942	0.729466	-0.0774836	0.275138
M	1.17512	-0.0586715	1.81522	0.568974
F	0.0354752	0.528509	1.00834	2.00426
F	1.23384	0.850979	1.61509	-0.120397
F	0.434525	0.936263	0.733121	1.50135
M	0.775215	1.12122	-0.0774836	1.83037
F	0.35028	0.528509	2.23886	0.540704
M	1.01068	1.17343	1.57007	-0.0582415
F	-1.38428	0.898127	2.12078	2.09783
M	1.04755	0.702487	0.581343	1.40516
F	0.319915	0.525571	0.163751	2.81902
M	0.714221	0.588888	2.10272	0.427763
M	0.240679	0.925341	1.72014	1.08656
M	0.964599	0.259617	0.959777	1.81117
F	1.41805	0.805405	2.29657	-0.481959
M	-0.50623	0.702487	1.75405	2.33102
F	1.30843	1.62766	2.13272	-0.742049
M	0.547302	2.39988	-0.183164	1.59274
F	1.33762	1.5948	0.495625	0.930987
M	0.380383	1.08279	2.29321	0.719007
F	0.061351	1.14229	2.44495	0.851186
F	0.472779	0.617973	0.171211	3.40122
M	1.328	0.797888	1.61021	0.982372
F	1.20254	1.14055	0.304142	2.12302
M	1.44429	1.34427	1.73185	0.367212
F	0.443343	1.18688	0.888819	2.47639
M	0.993351	1.07908	2.27526	0.710763
F	1.87634	0.688438	2.68573	-0.167102
F	0.518904	0.384967	1.09004	3.13033
M	0.560172	1.51297	2.39424	0.68085
M	0.763585	1.49195	2.42178	1.92917
M	1.23775	2.11837	2.58569	2.00253

## Sheet: Panel C
sex	split	esc_z_score	pr_z_score	shock_z_score	irr_z_score
F	Resilient	-2.1191	-2.44953	-2.16976	-0.758894
F	Resilient	-1.13328	-1.7003	-0.798592	-2.25644
F	Resilient	-2.964	-1.48362	-1.66618	0.465938
F	Resilient	-1.85336	-1.81733	-1.14506	-0.727714
F	Vulnerable	-0.946342	-2.47632	-1.17017	-0.649234
F	Resilient	-2.58987	-2.02421	-0.48972	-0.106836
F	Resilient	-1.78181	-1.60407	-1.35015	-0.435002
F	Resilient	-2.47921	-2.1781	-0.353836	-0.120397
F	Vulnerable	-1.31071	-2.1781	-1.01014	-0.0300993
F	Resilient	-1.42411	-1.7003	-0.798592	-0.36366
F	Resilient	-1.75319	-0.75104	-1.24761	-0.435002
F	Vulnerable	-0.757534	-1.52349	-1.1223	-0.67599
F	Resilient	-1.94583	-0.929772	-0.548865	-0.619552
F	Resilient	-1.05919	-0.964298	0.0854526	-2.0937
F	Resilient	-1.26456	-1.56733	-0.908123	-0.273496
F	Resilient	-1.22732	-1.81733	-0.529806	-0.337432
F	Vulnerable	-0.0558569	-1.24855	-1.26738	-1.22515
F	Resilient	-1.22061	-1.56733	-0.908123	-0.100468
F	Vulnerable	-0.614161	-1.48362	-1.2663	-0.39691
F	Resilient	-2.02512	-0.033264	-1.1223	-0.565037
F	Resilient	-1.81407	-1.34234	-0.679547	0.109536
F	Resilient	-1.9334	-0.780064	-0.747621	-0.120397
F	Resilient	-1.93274	-1.99498	-0.522834	0.918661
F	Vulnerable	-0.856913	-1.48362	-0.0666474	-1.08719
F	Vulnerable	-0.708239	-1.70977	-0.00399394	-1.06432
F	Resilient	-1.09496	-1.81733	-0.222177	-0.142291
F	Resilient	-1.93118	-1.24855	0.0498968	-0.0139539
F	Vulnerable	0.249493	-1.70977	-1.06638	-0.454084
F	Resilient	-1.90661	-1.7003	-1.03668	1.76572
F	Vulnerable	-0.555011	-0.404046	-1.11102	-0.639068
F	Vulnerable	-0.682132	-0.792222	-1.66618	0.552222
F	Vulnerable	0.0807184	-0.0810456	-1.92898	-0.571886
F	Vulnerable	-1.17398	-1.12	0.304142	-0.468435
F	Vulnerable	-0.74184	-1.24608	0.302473	-0.752482
F	Vulnerable	-1.31329	0.244869	0.333237	-1.69118
F	Vulnerable	-0.487931	-1.48362	-0.866416	0.465938
F	Resilient	-2.14484	-0.033264	-0.954551	0.821872
F	Resilient	-0.987868	-1.16336	-1.39382	1.29253
F	Vulnerable	-0.414806	-1.40794	-0.30936	-0.100468
F	Vulnerable	-0.954714	-1.52349	0.778818	-0.398608
F	Vulnerable	-0.584679	-0.447447	-0.441458	-0.600258
F	Vulnerable	-1.16487	0.0102752	-0.716537	-0.106836
F	Resilient	-1.51827	1.31699	-0.878883	-0.752482
F	Resilient	-1.04735	-0.447447	-1.03668	0.701031
F	Vulnerable	-0.39283	-0.610993	-0.30936	-0.446524
F	Vulnerable	-0.495387	0.504733	-1.38713	-0.273496
F	Vulnerable	-0.808363	0.590566	-0.666474	-0.655764
F	Vulnerable	-0.479661	0.528509	-0.427263	-1.118
F	Vulnerable	0.36921	-0.964655	-0.50723	-0.343131
F	Vulnerable	-0.217909	-0.215779	-0.149493	-0.830034
F	Vulnerable	0.410065	0.277782	-1.69921	-0.279592
F	Vulnerable	-0.641535	-0.17677	-1.11102	0.67901
F	Vulnerable	0.192187	0.151961	-1.14141	-0.391291
F	Vulnerable	0.749528	-1.47908	0.302473	-0.752482
F	Vulnerable	-0.636758	0.688438	-1.17017	0.0136969
F	Vulnerable	-0.0462769	0.339293	-0.73089	-0.620513
F	Vulnerable	0.729054	-0.441833	-1.17017	-0.167102
F	Vulnerable	0.450446	-0.537782	-0.32472	-0.630144
F	Vulnerable	0.291746	0.525571	-1.01047	-0.786942
F	Vulnerable	1.60863	-1.33721	-1.01047	-0.176702
F	Vulnerable	-0.272542	-0.215779	0.530959	-0.8903
F	Vulnerable	0.496589	-1.31315	0.771181	-0.758894
F	Vulnerable	0.146307	-0.667888	-0.0360846	-0.227369
F	Resilient	-1.63323	0.505057	0.771181	-0.399418
F	Vulnerable	0.628894	0.688438	-0.716537	-1.2519
F	Vulnerable	-0.472506	-0.111265	0.0854526	-0.0447199
F	Vulnerable	1.08009	-0.0810456	-1.40393	-0.120397
F	Vulnerable	-0.428553	0.277782	0.182992	-0.519243
F	Vulnerable	1.12394	-1.13792	-0.0666474	-0.39691
F	Vulnerable	-0.214538	-0.268468	0.868035	-0.836856
F	Vulnerable	0.334063	0.0894894	-0.679547	-0.127062
F	Vulnerable	-0.118948	0.0720202	-0.466531	0.207083
F	Vulnerable	0.403592	-0.0810456	-0.485098	-0.0300993
F	Vulnerable	-0.107618	0.315251	-0.734892	0.345563
F	Vulnerable	0.0734395	0.153014	0.163751	-0.50956
F	Vulnerable	0.219093	-0.547058	-0.747621	0.963177
F	Vulnerable	-0.272542	0.462384	-0.48972	0.194496
F	Vulnerable	0.901189	0.528509	-0.734892	-0.727714
F	Vulnerable	-0.342092	1.08398	-0.0913125	-0.662184
F	Vulnerable	0.99596	-0.964655	1.28205	-1.28623
F	Vulnerable	-0.254196	0.984384	-0.798592	0.109536
F	Vulnerable	-0.240977	2.41621	-1.15573	-0.955155
F	Vulnerable	0.222512	0.0265649	-0.0698556	-0.100468
F	Vulnerable	0.10078	0.462384	-0.376311	-0.106836
F	Vulnerable	0.546946	-0.215779	0.304142	-0.528701
F	Vulnerable	-0.651901	1.08441	-1.1223	0.821872
F	Vulnerable	-0.445544	1.3666	-0.603129	-0.167102
F	Vulnerable	0.436687	0.732333	0.535905	-1.47785
F	Vulnerable	-0.0705079	0.664123	-0.189608	-0.100468
F	Vulnerable	0.0169926	0.417717	-1.06636	0.983646
F	Vulnerable	1.81989	-1.33721	-0.61906	0.489014
F	Vulnerable	0.428982	0.315251	-0.529806	0.150421
F	Vulnerable	0.483076	-0.619374	-0.866416	1.41507
F	Vulnerable	0.672022	1.27068	-0.954551	-0.565037
F	Vulnerable	0.436687	0.277782	0.30063	-0.519243
F	Vulnerable	0.259744	0.763414	0.333237	-0.828334
F	Vulnerable	0.991689	0.0265649	0.0498968	-0.533038
F	Vulnerable	-0.211405	0.617973	-0.0913125	0.240794
F	Vulnerable	-0.00745277	0.315251	1.11088	-0.825285
F	Vulnerable	0.890328	0.711849	-0.954551	0.0452029
F	Vulnerable	0.881188	-0.273677	-0.266589	0.465938
F	Vulnerable	0.631497	0.626426	0.153766	-0.600258
F	Vulnerable	0.638107	-0.0894894	1.82039	-1.54665
F	Vulnerable	0.214282	0.898127	0.331497	-0.620513
F	Vulnerable	-0.458759	1.14229	0.888164	-0.706066
F	Vulnerable	-0.492144	-0.0894894	1.34421	0.109536
F	Vulnerable	-0.67318	0.462384	1.32482	-0.227369
F	Vulnerable	-0.138368	0.417717	0.333237	0.293368
F	Vulnerable	0.155602	0.626426	0.629945	-0.481959
F	Vulnerable	-0.180655	1.55	-0.485098	0.0601986
F	Vulnerable	0.27062	0.711849	0.275582	-0.287655
F	Vulnerable	0.20848	-0.0894894	1.10612	-0.245361
F	Vulnerable	-0.41996	1.45481	0.733121	-0.742049
F	Vulnerable	0.396753	0.732333	-0.993385	0.918661
F	Vulnerable	0.228256	-1.12	-1.28358	3.26809
F	Vulnerable	0.348083	0.711849	0.946563	-0.897895
F	Vulnerable	0.0945659	0.525571	0.611072	-0.121226
F	Vulnerable	0.822488	0.741768	0.0854526	-0.532573
F	Vulnerable	1.1382	0.0265649	-0.548865	0.50513
F	Vulnerable	0.949158	-1.13792	1.73283	-0.22434
F	Vulnerable	0.769472	-0.17677	0.888819	-0.159767
F	Vulnerable	1.33756	0.0720202	1.133	-1.17347
F	Vulnerable	0.980152	0.617973	0.696258	-0.84278
F	Vulnerable	1.39736	-0.778377	-0.00399394	0.877348
F	Vulnerable	0.903783	0.504733	1.48693	-1.39818
F	Vulnerable	1.33001	0.236329	0.530959	-0.588968
F	Vulnerable	0.543179	0.732333	0.653543	-0.399418
F	Vulnerable	0.86484	0.384967	0.696258	-0.391291
F	Vulnerable	1.02147	0.984384	0.153766	-0.600258
F	Vulnerable	0.530183	0.185954	-1.26738	2.1489
F	Vulnerable	0.698669	0.823512	-0.429113	0.50513
F	Vulnerable	-0.0269061	0.384967	0.564996	0.692284
F	Vulnerable	-0.478221	0.936263	-0.0666474	1.2425
F	Vulnerable	0.129777	1.45696	1.00248	-0.953371
F	Vulnerable	0.156582	-1.08916	1.12767	1.45678
F	Vulnerable	0.742849	1.18688	0.418268	-0.639068
F	Resilient	-1.66597	0.339293	2.34444	0.710919
F	Vulnerable	-0.61992	1.93924	1.48693	-1.05212
F	Vulnerable	0.769472	0.277782	1.00646	-0.279592
F	Vulnerable	0.972736	0.955026	0.290539	-0.435002
F	Vulnerable	0.716117	0.417717	0.333237	0.379653
F	Vulnerable	0.737252	0.447447	-0.322413	1.05593
F	Vulnerable	0.979891	0.741768	0.905797	-0.630144
F	Vulnerable	0.141931	-0.292214	-1.02787	3.18706
F	Vulnerable	0.228367	0.711849	1.17022	-0.0657497
F	Vulnerable	0.750471	0.805405	0.0347214	0.464433
F	Vulnerable	0.902493	0.447447	-0.679547	1.41083
F	Vulnerable	0.00972624	1.14055	-0.149493	1.09849
F	Vulnerable	0.903277	0.384967	0.958781	-0.120397
F	Vulnerable	1.30858	0.0505057	0.888819	-0.0399418
F	Vulnerable	1.04791	0.447447	0.868035	-0.127062
F	Vulnerable	0.0540255	1.14229	0.648659	0.418616
F	Vulnerable	0.89559	0.151961	0.82752	0.42139
F	Vulnerable	0.717423	-0.0894894	-0.0843234	1.76572
F	Vulnerable	1.06575	0.741768	-0.427263	0.930987
F	Vulnerable	0.583367	0.914492	0.984595	-0.0465695
F	Vulnerable	0.398324	0.504733	0.888164	0.678158
F	Vulnerable	-0.546191	1.45481	-0.466531	2.10535
F	Vulnerable	1.18948	0.664123	-0.429113	1.19724
F	Vulnerable	1.01132	0.236329	1.55164	-0.167102
F	Vulnerable	0.149906	0.151961	2.14014	0.331092
F	Vulnerable	0.55649	0.277782	0.30063	1.87726
F	Vulnerable	1.30185	0.528509	1.6236	-0.435002
F	Vulnerable	0.987999	-0.100828	0.333237	1.84649
F	Vulnerable	2.38353	0.664123	0.528907	-0.446524
F	Vulnerable	0.587516	0.898127	0.0519212	1.70949
F	Vulnerable	0.335971	0.101993	1.72614	1.12613
F	Vulnerable	1.53702	0.447447	0.629945	0.701031
F	Vulnerable	0.929738	0.590566	1.33295	0.552222
F	Vulnerable	0.0354752	0.528509	1.00834	2.00426
F	Vulnerable	1.23384	0.850979	1.61509	-0.120397
F	Vulnerable	0.434525	0.936263	0.733121	1.50135
F	Vulnerable	0.35028	0.528509	2.23886	0.540704
F	Resilient	-1.38428	0.898127	2.12078	2.09783
F	Vulnerable	0.319915	0.525571	0.163751	2.81902
F	Vulnerable	1.41805	0.805405	2.29657	-0.481959
F	Vulnerable	1.30843	1.62766	2.13272	-0.742049
F	Vulnerable	1.33762	1.5948	0.495625	0.930987
F	Vulnerable	0.061351	1.14229	2.44495	0.851186
F	Vulnerable	0.472779	0.617973	0.171211	3.40122
F	Vulnerable	1.20254	1.14055	0.304142	2.12302
F	Vulnerable	0.443343	1.18688	0.888819	2.47639
F	Vulnerable	1.87634	0.688438	2.68573	-0.167102
F	Vulnerable	0.518904	0.384967	1.09004	3.13033

## Sheet: Panel D
sex	split	esc_z_score	pr_z_score	shock_z_score	irr_z_score
M	Resilient	-2.9806	-1.81693	-1.16465	-1.23246
M	Resilient	-2.17745	-1.93365	-1.24287	-0.83234
M	Resilient	-2.07808	-1.55706	-0.98227	-0.986651
M	Resilient	-1.82295	-1.38674	-0.945124	-1.39251
M	Resilient	-1.8896	-1.65513	-0.945084	-0.740292
M	Resilient	-1.82514	-1.74535	-0.721668	-0.909496
M	Resilient	-1.4446	-1.08542	-1.24906	-1.04387
M	Resilient	-1.4446	-1.49612	-1.37163	-0.416651
M	Resilient	-1.60833	-1.93365	-0.851969	-0.137944
M	Vulnerable	-0.872038	-1.81693	-1.01274	-0.728873
M	Resilient	-1.75618	-1.2221	-0.945124	-0.445966
M	Resilient	-1.68941	-1.55137	-0.564144	-0.518777
M	Resilient	-1.04344	-1.22928	-0.976294	-0.941997
M	Resilient	-1.78035	-1.44532	-0.945084	-0.0122565
M	Resilient	-1.04344	-1.22928	-0.751591	-1.14485
M	Resilient	-1.53755	-0.596628	-0.926275	-0.995639
M	Resilient	-1.56233	-0.958628	-1.0327	-0.410631
M	Resilient	-1.42759	-1.29077	-1.00391	-0.237446
M	Resilient	-1.38061	-0.958628	-1.13912	-0.447194
M	Resilient	-0.779704	-1.38674	-0.754634	-0.955642
M	Resilient	-1.01272	-1.22928	-1.201	-0.265811
M	Resilient	-1.84278	-1.44532	-0.590677	0.311315
M	Resilient	-1.4446	-1.49612	0.344366	-0.954264
M	Resilient	-1.89907	-1.2055	-0.457578	0.0156928
M	Resilient	-1.04958	-1.22928	-0.526889	-0.671523
M	Resilient	-1.92815	-1.2055	-0.822482	0.542972
M	Resilient	-1.01886	-1.22928	-0.751591	-0.265811
M	Vulnerable	0.982082	-1.23552	-1.12229	-1.63011
M	Vulnerable	-0.452039	-2.03196	-0.860828	0.404193
M	Resilient	-1.56233	-0.777628	-1.0327	0.503445
M	Resilient	-1.04344	-1.22928	-0.976294	0.410375
M	Resilient	-0.860243	-0.777628	-1.0327	-0.15469
M	Vulnerable	-0.539922	-1.2055	-0.944116	-0.0721871
M	Resilient	-1.75618	-1.05747	-0.754634	0.864628
M	Vulnerable	-0.118368	-1.2055	-0.944116	-0.335827
M	Vulnerable	-0.932038	-0.526803	-0.557007	-0.540028
M	Resilient	-0.945131	-0.837535	-0.751591	0.00466335
M	Vulnerable	0.338653	-1.55137	-0.564144	-0.591588
M	Vulnerable	-0.315096	-0.777628	-0.713429	-0.556883
M	Resilient	-1.84278	-1.23552	-1.12229	1.84828
M	Resilient	-1.00657	-0.837535	-0.751591	0.342756
M	Resilient	-1.41365	-0.596628	-0.0748903	-0.118127
M	Resilient	-1.2522	-1.02338	-0.335943	0.455092
M	Vulnerable	-0.248147	0.146679	-0.636201	-1.31267
M	Resilient	-0.888202	0.424253	-0.945124	-0.518777
M	Resilient	-0.791529	-0.837535	0.596624	-0.80676
M	Vulnerable	-0.305492	-0.606103	-0.76788	-0.0122565
M	Vulnerable	-0.246326	1.19337	-1.16465	-1.29541
M	Resilient	-1.51503	-0.186493	-0.413474	0.634886
M	Resilient	-1.82295	-1.55137	-1.13561	3.04895
M	Resilient	-0.98814	-0.445785	-0.302186	0.275138
M	Resilient	-1.68103	-0.841252	-0.700847	1.77329
M	Vulnerable	-0.614896	0.548305	-0.405096	-0.917717
M	Resilient	-1.28583	-0.264022	0.95722	-0.77506
M	Vulnerable	-0.340611	0.333284	-0.708918	-0.602976
M	Vulnerable	0.872794	-0.0696534	-0.564144	-1.53813
M	Vulnerable	-0.0452607	0.424253	-0.564144	-1.10126
M	Vulnerable	0.379065	-1.55706	-0.721668	0.633607
M	Vulnerable	-0.67075	-0.659125	-0.700847	0.806612
M	Vulnerable	0.339528	0.797888	-0.700847	-1.65403
M	Resilient	-1.01886	-1.03341	-0.302186	1.2218
M	Resilient	-1.47147	-0.777628	-0.607006	1.74659
M	Vulnerable	-0.180147	-1.02338	-0.822482	0.982372
M	Resilient	-1.38249	-0.615581	-0.330764	1.328
M	Vulnerable	0.193931	-1.44532	0.118135	0.149529
M	Vulnerable	0.333896	-0.23899	-0.591366	-0.446565
M	Vulnerable	0.123941	0.141841	-0.0774836	-1.07723
M	Vulnerable	0.474155	0.729466	-0.751591	-1.21247
M	Vulnerable	-0.321099	0.442921	-0.945084	0.0686363
M	Resilient	-1.45027	-1.29077	0.099224	1.91301
M	Vulnerable	0.499428	1.16214	-0.335943	-2.00554
M	Resilient	-0.85297	-1.03341	0.596624	0.613231
M	Vulnerable	0.739259	0.0949819	-1.3261	-0.154723
M	Resilient	-0.152543	-0.64166	0.371921	-0.130574
M	Vulnerable	0.0152959	-0.415629	0.563648	-0.703135
M	Vulnerable	0.535664	0.851369	-0.607006	-1.25158
M	Vulnerable	1.06012	0.233116	-0.0590677	-1.63011
M	Vulnerable	-0.623468	0.333284	-0.860828	0.781881
M	Vulnerable	-0.17468	0.670369	-0.819852	-0.00843762
M	Vulnerable	0.758678	-0.596628	0.350802	-0.812824
M	Vulnerable	-0.108601	-0.958628	0.457225	0.357193
M	Vulnerable	0.29054	0.968079	-0.268488	-1.22307
M	Vulnerable	-0.325558	-0.23899	-0.0701621	0.402142
M	Vulnerable	1.49407	0.729466	-0.0774836	-2.36199
M	Vulnerable	0.198392	0.514192	0.19044	-1.06381
M	Vulnerable	0.993351	0.137601	-0.98227	-0.292254
M	Vulnerable	0.189359	0.137601	-0.721668	0.324987
M	Vulnerable	0.740174	0.0233116	-0.945084	0.149529
M	Vulnerable	0.622972	0.325896	-0.98227	0.0163662
M	Vulnerable	1.01635	1.17343	-1.37163	-0.77506
M	Vulnerable	0.162258	-0.427286	-0.330764	0.710763
M	Vulnerable	0.33653	0.333284	-0.253185	-0.288236
M	Vulnerable	0.906446	0.615762	-0.700847	-0.687346
M	Vulnerable	1.0211	0.233116	-0.945084	-0.174042
M	Vulnerable	0.638729	1.07234	-0.590677	-0.98297
M	Resilient	-0.480292	0.12737	-0.819852	1.38096
M	Vulnerable	-0.00353098	0.588888	0.388307	-0.737209
M	Vulnerable	-0.0245665	-0.606103	-0.413474	1.28203
M	Vulnerable	0.632006	0.325896	0.060139	-0.755185
M	Vulnerable	0.6926	-0.415629	0.0315328	0.0646884
M	Vulnerable	-0.350214	-0.880072	-0.881343	2.54022
M	Vulnerable	0.740409	1.07908	-0.591366	-0.755185
M	Vulnerable	0.131503	0.862531	0.472542	-0.98297
M	Resilient	-1.31994	-1.02571	1.18135	1.68649
M	Vulnerable	1.68378	0.489369	-0.819852	-0.739698
M	Vulnerable	0.163388	0.753523	0.388307	-0.664398
M	Vulnerable	0.931215	0.259617	-0.373654	-0.154723
M	Vulnerable	0.568703	-0.958628	0.0315328	1.05189
M	Vulnerable	1.16229	0.533591	-0.976294	0.00466335
M	Vulnerable	0.833816	1.28214	-0.236271	-1.14476
M	Vulnerable	0.646533	0.862531	0.649745	-1.38743
M	Vulnerable	-0.0820267	0.433635	-0.822482	1.24601
M	Vulnerable	0.882576	1.75637	-0.819852	-0.959076
M	Vulnerable	1.06171	-0.469372	0.95722	-0.685457
M	Vulnerable	0.655799	0.259617	-0.183164	0.13652
M	Vulnerable	0.271885	-0.0696534	0.388307	0.282142
M	Vulnerable	0.602411	1.17343	-0.881343	0.0313608
M	Vulnerable	-0.208121	0.702487	1.23285	-0.755185
M	Resilient	-0.545765	1.90472	-0.0774836	-0.265811
M	Vulnerable	0.677174	0.702487	-0.721668	0.402142
M	Vulnerable	-0.306326	1.40839	0.50637	-0.540028
M	Vulnerable	0.0750652	0.352029	0.344366	0.300168
M	Vulnerable	0.597377	0.424253	-0.373654	0.427763
M	Vulnerable	0.704275	0.890782	-0.721668	0.247832
M	Vulnerable	-0.872038	0.548305	0.50637	0.970726
M	Vulnerable	0.43038	0.251508	-0.457578	0.982372
M	Vulnerable	0.772523	0.146679	-0.268488	0.568974
M	Vulnerable	0.41221	1.52639	-0.457578	-0.247947
M	Vulnerable	0.139307	1.28214	0.649745	-0.821184
M	Vulnerable	0.979385	-1.38689	-1.01274	2.73327
M	Vulnerable	0.647453	0.424253	0.197817	0.0637094
M	Vulnerable	0.840568	0.762729	-0.51363	0.300168
M	Vulnerable	0.882576	-0.958628	1.94715	-0.447194
M	Vulnerable	0.396821	1.07234	-0.590677	0.553993
M	Vulnerable	0.350001	0.442921	0.118135	0.553993
M	Vulnerable	1.19645	0.489369	0.776494	-0.995639
M	Vulnerable	0.171291	0.514192	0.711644	0.0935214
M	Vulnerable	0.542243	0.548305	0.050637	0.404193
M	Vulnerable	1.05653	0.333284	0.354459	-0.16234
M	Vulnerable	0.381214	0.652726	0.826948	-0.174042
M	Vulnerable	1.42034	0.729466	0.371921	-0.80676
M	Vulnerable	0.525101	0.333284	1.26592	-0.351184
M	Vulnerable	0.0502121	0.925341	-1.201	2.03322
M	Vulnerable	1.00093	0.433635	1.61021	-1.21463
M	Vulnerable	1.09133	0.862531	0.472542	-0.497613
M	Vulnerable	0.704478	-0.674722	1.4475	0.479372
M	Vulnerable	-0.0755619	0.30837	1.41503	0.357193
M	Vulnerable	0.455819	-1.2055	0.637134	2.12481
M	Vulnerable	0.959538	1.12122	0.596624	-0.603904
M	Vulnerable	1.4525	1.57537	0.350802	-1.28814
M	Vulnerable	0.188426	1.24743	0.197817	0.573385
M	Vulnerable	0.288651	0.615762	0.880403	0.455092
M	Vulnerable	0.650073	1.64396	-0.0701621	0.0163662
M	Vulnerable	0.517163	0.337716	2.16954	-0.739141
M	Vulnerable	0.467053	-0.186493	-0.0590677	2.09096
M	Vulnerable	0.593482	1.93737	0.563648	-0.739698
M	Vulnerable	0.163972	-0.415629	1.30861	1.34439
M	Vulnerable	0.893981	0.514192	1.75405	-0.755185
M	Vulnerable	0.0483352	1.21337	-0.607006	1.81971
M	Vulnerable	0.848813	0.325896	1.49345	-0.137944
M	Vulnerable	0.749842	0.762729	1.07979	-0.0582415
M	Vulnerable	1.07367	0.763327	0.658281	0.0894525
M	Vulnerable	0.97797	1.12122	-0.526889	1.01894
M	Vulnerable	0.638729	-0.606103	2.42178	0.230422
M	Vulnerable	0.70763	0.141841	0.371921	1.49227
M	Vulnerable	0.739278	0.433635	1.00204	0.542972
M	Vulnerable	1.4551	-0.0967598	1.72166	-0.351184
M	Vulnerable	0.859385	0.548305	1.41784	-0.0364436
M	Vulnerable	0.44715	-0.234289	2.10272	0.500574
M	Vulnerable	0.560172	0.337716	1.94484	0.00466335
M	Vulnerable	0.506696	1.16214	1.73185	-0.511587
M	Vulnerable	1.03137	0.0949819	0.959777	0.937439
M	Vulnerable	0.57973	1.58413	0.221795	0.837781
M	Vulnerable	1.0731	0.753523	0.197817	1.22868
M	Vulnerable	-0.126818	-0.0506949	0.581343	2.94826
M	Vulnerable	0.365607	0.862531	1.35856	0.796671
M	Vulnerable	2.48942	0.729466	-0.0774836	0.275138
M	Vulnerable	1.17512	-0.0586715	1.81522	0.568974
M	Vulnerable	0.775215	1.12122	-0.0774836	1.83037
M	Vulnerable	1.01068	1.17343	1.57007	-0.0582415
M	Vulnerable	1.04755	0.702487	0.581343	1.40516
M	Vulnerable	0.714221	0.588888	2.10272	0.427763
M	Vulnerable	0.240679	0.925341	1.72014	1.08656
M	Vulnerable	0.964599	0.259617	0.959777	1.81117
M	Vulnerable	-0.50623	0.702487	1.75405	2.33102
M	Vulnerable	0.547302	2.39988	-0.183164	1.59274
M	Vulnerable	0.380383	1.08279	2.29321	0.719007
M	Vulnerable	1.328	0.797888	1.61021	0.982372
M	Vulnerable	1.44429	1.34427	1.73185	0.367212
M	Vulnerable	0.993351	1.07908	2.27526	0.710763
M	Vulnerable	0.560172	1.51297	2.39424	0.68085
M	Vulnerable	0.763585	1.49195	2.42178	1.92917
M	Vulnerable	1.23775	2.11837	2.58569	2.00253

## Sheet: Panel E
sex	split	esc_z_score	pr_z_score	shock_z_score
F	Resilient	-2.1191	-2.44953	-2.16976
F	Resilient	-1.13328	-1.7003	-0.798592
F	Resilient	-2.964	-1.48362	-1.66618
F	Resilient	-1.85336	-1.81733	-1.14506
F	Vulnerable	-0.946342	-2.47632	-1.17017
F	Resilient	-2.58987	-2.02421	-0.48972
F	Resilient	-1.78181	-1.60407	-1.35015
F	Resilient	-2.47921	-2.1781	-0.353836
F	Vulnerable	-1.31071	-2.1781	-1.01014
F	Resilient	-1.42411	-1.7003	-0.798592
F	Resilient	-1.75319	-0.75104	-1.24761
F	Vulnerable	-0.757534	-1.52349	-1.1223
F	Resilient	-1.94583	-0.929772	-0.548865
F	Resilient	-1.05919	-0.964298	0.0854526
F	Resilient	-1.26456	-1.56733	-0.908123
F	Resilient	-1.22732	-1.81733	-0.529806
F	Vulnerable	-0.0558569	-1.24855	-1.26738
F	Resilient	-1.22061	-1.56733	-0.908123
F	Vulnerable	-0.614161	-1.48362	-1.2663
F	Resilient	-2.02512	-0.033264	-1.1223
F	Resilient	-1.81407	-1.34234	-0.679547
F	Resilient	-1.9334	-0.780064	-0.747621
F	Resilient	-1.93274	-1.99498	-0.522834
F	Vulnerable	-0.856913	-1.48362	-0.0666474
F	Vulnerable	-0.708239	-1.70977	-0.00399394
F	Resilient	-1.09496	-1.81733	-0.222177
F	Resilient	-1.93118	-1.24855	0.0498968
F	Vulnerable	0.249493	-1.70977	-1.06638
F	Resilient	-1.90661	-1.7003	-1.03668
F	Vulnerable	-0.555011	-0.404046	-1.11102
F	Vulnerable	-0.682132	-0.792222	-1.66618
F	Vulnerable	0.0807184	-0.0810456	-1.92898
F	Vulnerable	-1.17398	-1.12	0.304142
F	Vulnerable	-0.74184	-1.24608	0.302473
F	Vulnerable	-1.31329	0.244869	0.333237
F	Vulnerable	-0.487931	-1.48362	-0.866416
F	Resilient	-2.14484	-0.033264	-0.954551
F	Resilient	-0.987868	-1.16336	-1.39382
F	Vulnerable	-0.414806	-1.40794	-0.30936
F	Vulnerable	-0.954714	-1.52349	0.778818
F	Vulnerable	-0.584679	-0.447447	-0.441458
F	Vulnerable	-1.16487	0.0102752	-0.716537
F	Resilient	-1.51827	1.31699	-0.878883
F	Resilient	-1.04735	-0.447447	-1.03668
F	Vulnerable	-0.39283	-0.610993	-0.30936
F	Vulnerable	-0.495387	0.504733	-1.38713
F	Vulnerable	-0.808363	0.590566	-0.666474
F	Vulnerable	-0.479661	0.528509	-0.427263
F	Vulnerable	0.36921	-0.964655	-0.50723
F	Vulnerable	-0.217909	-0.215779	-0.149493
F	Vulnerable	0.410065	0.277782	-1.69921
F	Vulnerable	-0.641535	-0.17677	-1.11102
F	Vulnerable	0.192187	0.151961	-1.14141
F	Vulnerable	0.749528	-1.47908	0.302473
F	Vulnerable	-0.636758	0.688438	-1.17017
F	Vulnerable	-0.0462769	0.339293	-0.73089
F	Vulnerable	0.729054	-0.441833	-1.17017
F	Vulnerable	0.450446	-0.537782	-0.32472
F	Vulnerable	0.291746	0.525571	-1.01047
F	Vulnerable	1.60863	-1.33721	-1.01047
F	Vulnerable	-0.272542	-0.215779	0.530959
F	Vulnerable	0.496589	-1.31315	0.771181
F	Vulnerable	0.146307	-0.667888	-0.0360846
F	Resilient	-1.63323	0.505057	0.771181
F	Vulnerable	0.628894	0.688438	-0.716537
F	Vulnerable	-0.472506	-0.111265	0.0854526
F	Vulnerable	1.08009	-0.0810456	-1.40393
F	Vulnerable	-0.428553	0.277782	0.182992
F	Vulnerable	1.12394	-1.13792	-0.0666474
F	Vulnerable	-0.214538	-0.268468	0.868035
F	Vulnerable	0.334063	0.0894894	-0.679547
F	Vulnerable	-0.118948	0.0720202	-0.466531
F	Vulnerable	0.403592	-0.0810456	-0.485098
F	Vulnerable	-0.107618	0.315251	-0.734892
F	Vulnerable	0.0734395	0.153014	0.163751
F	Vulnerable	0.219093	-0.547058	-0.747621
F	Vulnerable	-0.272542	0.462384	-0.48972
F	Vulnerable	0.901189	0.528509	-0.734892
F	Vulnerable	-0.342092	1.08398	-0.0913125
F	Vulnerable	0.99596	-0.964655	1.28205
F	Vulnerable	-0.254196	0.984384	-0.798592
F	Vulnerable	-0.240977	2.41621	-1.15573
F	Vulnerable	0.222512	0.0265649	-0.0698556
F	Vulnerable	0.10078	0.462384	-0.376311
F	Vulnerable	0.546946	-0.215779	0.304142
F	Vulnerable	-0.651901	1.08441	-1.1223
F	Vulnerable	-0.445544	1.3666	-0.603129
F	Vulnerable	0.436687	0.732333	0.535905
F	Vulnerable	-0.0705079	0.664123	-0.189608
F	Vulnerable	0.0169926	0.417717	-1.06636
F	Vulnerable	1.81989	-1.33721	-0.61906
F	Vulnerable	0.428982	0.315251	-0.529806
F	Vulnerable	0.483076	-0.619374	-0.866416
F	Vulnerable	0.672022	1.27068	-0.954551
F	Vulnerable	0.436687	0.277782	0.30063
F	Vulnerable	0.259744	0.763414	0.333237
F	Vulnerable	0.991689	0.0265649	0.0498968
F	Vulnerable	-0.211405	0.617973	-0.0913125
F	Vulnerable	-0.00745277	0.315251	1.11088
F	Vulnerable	0.890328	0.711849	-0.954551
F	Vulnerable	0.881188	-0.273677	-0.266589
F	Vulnerable	0.631497	0.626426	0.153766
F	Vulnerable	0.638107	-0.0894894	1.82039
F	Vulnerable	0.214282	0.898127	0.331497
F	Vulnerable	-0.458759	1.14229	0.888164
F	Vulnerable	-0.492144	-0.0894894	1.34421
F	Vulnerable	-0.67318	0.462384	1.32482
F	Vulnerable	-0.138368	0.417717	0.333237
F	Vulnerable	0.155602	0.626426	0.629945
F	Vulnerable	-0.180655	1.55	-0.485098
F	Vulnerable	0.27062	0.711849	0.275582
F	Vulnerable	0.20848	-0.0894894	1.10612
F	Vulnerable	-0.41996	1.45481	0.733121
F	Vulnerable	0.396753	0.732333	-0.993385
F	Vulnerable	0.228256	-1.12	-1.28358
F	Vulnerable	0.348083	0.711849	0.946563
F	Vulnerable	0.0945659	0.525571	0.611072
F	Vulnerable	0.822488	0.741768	0.0854526
F	Vulnerable	1.1382	0.0265649	-0.548865
F	Vulnerable	0.949158	-1.13792	1.73283
F	Vulnerable	0.769472	-0.17677	0.888819
F	Vulnerable	1.33756	0.0720202	1.133
F	Vulnerable	0.980152	0.617973	0.696258
F	Vulnerable	1.39736	-0.778377	-0.00399394
F	Vulnerable	0.903783	0.504733	1.48693
F	Vulnerable	1.33001	0.236329	0.530959
F	Vulnerable	0.543179	0.732333	0.653543
F	Vulnerable	0.86484	0.384967	0.696258
F	Vulnerable	1.02147	0.984384	0.153766
F	Vulnerable	0.530183	0.185954	-1.26738
F	Vulnerable	0.698669	0.823512	-0.429113
F	Vulnerable	-0.0269061	0.384967	0.564996
F	Vulnerable	-0.478221	0.936263	-0.0666474
F	Vulnerable	0.129777	1.45696	1.00248
F	Vulnerable	0.156582	-1.08916	1.12767
F	Vulnerable	0.742849	1.18688	0.418268
F	Resilient	-1.66597	0.339293	2.34444
F	Vulnerable	-0.61992	1.93924	1.48693
F	Vulnerable	0.769472	0.277782	1.00646
F	Vulnerable	0.972736	0.955026	0.290539
F	Vulnerable	0.716117	0.417717	0.333237
F	Vulnerable	0.737252	0.447447	-0.322413
F	Vulnerable	0.979891	0.741768	0.905797
F	Vulnerable	0.141931	-0.292214	-1.02787
F	Vulnerable	0.228367	0.711849	1.17022
F	Vulnerable	0.750471	0.805405	0.0347214
F	Vulnerable	0.902493	0.447447	-0.679547
F	Vulnerable	0.00972624	1.14055	-0.149493
F	Vulnerable	0.903277	0.384967	0.958781
F	Vulnerable	1.30858	0.0505057	0.888819
F	Vulnerable	1.04791	0.447447	0.868035
F	Vulnerable	0.0540255	1.14229	0.648659
F	Vulnerable	0.89559	0.151961	0.82752
F	Vulnerable	0.717423	-0.0894894	-0.0843234
F	Vulnerable	1.06575	0.741768	-0.427263
F	Vulnerable	0.583367	0.914492	0.984595
F	Vulnerable	0.398324	0.504733	0.888164
F	Vulnerable	-0.546191	1.45481	-0.466531
F	Vulnerable	1.18948	0.664123	-0.429113
F	Vulnerable	1.01132	0.236329	1.55164
F	Vulnerable	0.149906	0.151961	2.14014
F	Vulnerable	0.55649	0.277782	0.30063
F	Vulnerable	1.30185	0.528509	1.6236
F	Vulnerable	0.987999	-0.100828	0.333237
F	Vulnerable	2.38353	0.664123	0.528907
F	Vulnerable	0.587516	0.898127	0.0519212
F	Vulnerable	0.335971	0.101993	1.72614
F	Vulnerable	1.53702	0.447447	0.629945
F	Vulnerable	0.929738	0.590566	1.33295
F	Vulnerable	0.0354752	0.528509	1.00834
F	Vulnerable	1.23384	0.850979	1.61509
F	Vulnerable	0.434525	0.936263	0.733121
F	Vulnerable	0.35028	0.528509	2.23886
F	Resilient	-1.38428	0.898127	2.12078
F	Vulnerable	0.319915	0.525571	0.163751
F	Vulnerable	1.41805	0.805405	2.29657
F	Vulnerable	1.30843	1.62766	2.13272
F	Vulnerable	1.33762	1.5948	0.495625
F	Vulnerable	0.061351	1.14229	2.44495
F	Vulnerable	0.472779	0.617973	0.171211
F	Vulnerable	1.20254	1.14055	0.304142
F	Vulnerable	0.443343	1.18688	0.888819
F	Vulnerable	1.87634	0.688438	2.68573
F	Vulnerable	0.518904	0.384967	1.09004

## Sheet: Panel F
sex	split	esc_z_score	pr_z_score	shock_z_score
M	Resilient	-2.9806	-1.81693	-1.16465
M	Resilient	-2.17745	-1.93365	-1.24287
M	Resilient	-2.07808	-1.55706	-0.98227
M	Resilient	-1.82295	-1.38674	-0.945124
M	Resilient	-1.8896	-1.65513	-0.945084
M	Resilient	-1.82514	-1.74535	-0.721668
M	Resilient	-1.4446	-1.08542	-1.24906
M	Resilient	-1.4446	-1.49612	-1.37163
M	Resilient	-1.60833	-1.93365	-0.851969
M	Vulnerable	-0.872038	-1.81693	-1.01274
M	Resilient	-1.75618	-1.2221	-0.945124
M	Resilient	-1.68941	-1.55137	-0.564144
M	Resilient	-1.04344	-1.22928	-0.976294
M	Resilient	-1.78035	-1.44532	-0.945084
M	Resilient	-1.04344	-1.22928	-0.751591
M	Resilient	-1.53755	-0.596628	-0.926275
M	Resilient	-1.56233	-0.958628	-1.0327
M	Resilient	-1.42759	-1.29077	-1.00391
M	Resilient	-1.38061	-0.958628	-1.13912
M	Resilient	-0.779704	-1.38674	-0.754634
M	Resilient	-1.01272	-1.22928	-1.201
M	Resilient	-1.84278	-1.44532	-0.590677
M	Resilient	-1.4446	-1.49612	0.344366
M	Resilient	-1.89907	-1.2055	-0.457578
M	Resilient	-1.04958	-1.22928	-0.526889
M	Resilient	-1.92815	-1.2055	-0.822482
M	Resilient	-1.01886	-1.22928	-0.751591
M	Vulnerable	0.982082	-1.23552	-1.12229
M	Vulnerable	-0.452039	-2.03196	-0.860828
M	Resilient	-1.56233	-0.777628	-1.0327
M	Resilient	-1.04344	-1.22928	-0.976294
M	Resilient	-0.860243	-0.777628	-1.0327
M	Vulnerable	-0.539922	-1.2055	-0.944116
M	Resilient	-1.75618	-1.05747	-0.754634
M	Vulnerable	-0.118368	-1.2055	-0.944116
M	Vulnerable	-0.932038	-0.526803	-0.557007
M	Resilient	-0.945131	-0.837535	-0.751591
M	Vulnerable	0.338653	-1.55137	-0.564144
M	Vulnerable	-0.315096	-0.777628	-0.713429
M	Resilient	-1.84278	-1.23552	-1.12229
M	Resilient	-1.00657	-0.837535	-0.751591
M	Resilient	-1.41365	-0.596628	-0.0748903
M	Resilient	-1.2522	-1.02338	-0.335943
M	Vulnerable	-0.248147	0.146679	-0.636201
M	Resilient	-0.888202	0.424253	-0.945124
M	Resilient	-0.791529	-0.837535	0.596624
M	Vulnerable	-0.305492	-0.606103	-0.76788
M	Vulnerable	-0.246326	1.19337	-1.16465
M	Resilient	-1.51503	-0.186493	-0.413474
M	Resilient	-1.82295	-1.55137	-1.13561
M	Resilient	-0.98814	-0.445785	-0.302186
M	Resilient	-1.68103	-0.841252	-0.700847
M	Vulnerable	-0.614896	0.548305	-0.405096
M	Resilient	-1.28583	-0.264022	0.95722
M	Vulnerable	-0.340611	0.333284	-0.708918
M	Vulnerable	0.872794	-0.0696534	-0.564144
M	Vulnerable	-0.0452607	0.424253	-0.564144
M	Vulnerable	0.379065	-1.55706	-0.721668
M	Vulnerable	-0.67075	-0.659125	-0.700847
M	Vulnerable	0.339528	0.797888	-0.700847
M	Resilient	-1.01886	-1.03341	-0.302186
M	Resilient	-1.47147	-0.777628	-0.607006
M	Vulnerable	-0.180147	-1.02338	-0.822482
M	Resilient	-1.38249	-0.615581	-0.330764
M	Vulnerable	0.193931	-1.44532	0.118135
M	Vulnerable	0.333896	-0.23899	-0.591366
M	Vulnerable	0.123941	0.141841	-0.0774836
M	Vulnerable	0.474155	0.729466	-0.751591
M	Vulnerable	-0.321099	0.442921	-0.945084
M	Resilient	-1.45027	-1.29077	0.099224
M	Vulnerable	0.499428	1.16214	-0.335943
M	Resilient	-0.85297	-1.03341	0.596624
M	Vulnerable	0.739259	0.0949819	-1.3261
M	Resilient	-0.152543	-0.64166	0.371921
M	Vulnerable	0.0152959	-0.415629	0.563648
M	Vulnerable	0.535664	0.851369	-0.607006
M	Vulnerable	1.06012	0.233116	-0.0590677
M	Vulnerable	-0.623468	0.333284	-0.860828
M	Vulnerable	-0.17468	0.670369	-0.819852
M	Vulnerable	0.758678	-0.596628	0.350802
M	Vulnerable	-0.108601	-0.958628	0.457225
M	Vulnerable	0.29054	0.968079	-0.268488
M	Vulnerable	-0.325558	-0.23899	-0.0701621
M	Vulnerable	1.49407	0.729466	-0.0774836
M	Vulnerable	0.198392	0.514192	0.19044
M	Vulnerable	0.993351	0.137601	-0.98227
M	Vulnerable	0.189359	0.137601	-0.721668
M	Vulnerable	0.740174	0.0233116	-0.945084
M	Vulnerable	0.622972	0.325896	-0.98227
M	Vulnerable	1.01635	1.17343	-1.37163
M	Vulnerable	0.162258	-0.427286	-0.330764
M	Vulnerable	0.33653	0.333284	-0.253185
M	Vulnerable	0.906446	0.615762	-0.700847
M	Vulnerable	1.0211	0.233116	-0.945084
M	Vulnerable	0.638729	1.07234	-0.590677
M	Resilient	-0.480292	0.12737	-0.819852
M	Vulnerable	-0.00353098	0.588888	0.388307
M	Vulnerable	-0.0245665	-0.606103	-0.413474
M	Vulnerable	0.632006	0.325896	0.060139
M	Vulnerable	0.6926	-0.415629	0.0315328
M	Vulnerable	-0.350214	-0.880072	-0.881343
M	Vulnerable	0.740409	1.07908	-0.591366
M	Vulnerable	0.131503	0.862531	0.472542
M	Resilient	-1.31994	-1.02571	1.18135
M	Vulnerable	1.68378	0.489369	-0.819852
M	Vulnerable	0.163388	0.753523	0.388307
M	Vulnerable	0.931215	0.259617	-0.373654
M	Vulnerable	0.568703	-0.958628	0.0315328
M	Vulnerable	1.16229	0.533591	-0.976294
M	Vulnerable	0.833816	1.28214	-0.236271
M	Vulnerable	0.646533	0.862531	0.649745
M	Vulnerable	-0.0820267	0.433635	-0.822482
M	Vulnerable	0.882576	1.75637	-0.819852
M	Vulnerable	1.06171	-0.469372	0.95722
M	Vulnerable	0.655799	0.259617	-0.183164
M	Vulnerable	0.271885	-0.0696534	0.388307
M	Vulnerable	0.602411	1.17343	-0.881343
M	Vulnerable	-0.208121	0.702487	1.23285
M	Resilient	-0.545765	1.90472	-0.0774836
M	Vulnerable	0.677174	0.702487	-0.721668
M	Vulnerable	-0.306326	1.40839	0.50637
M	Vulnerable	0.0750652	0.352029	0.344366
M	Vulnerable	0.597377	0.424253	-0.373654
M	Vulnerable	0.704275	0.890782	-0.721668
M	Vulnerable	-0.872038	0.548305	0.50637
M	Vulnerable	0.43038	0.251508	-0.457578
M	Vulnerable	0.772523	0.146679	-0.268488
M	Vulnerable	0.41221	1.52639	-0.457578
M	Vulnerable	0.139307	1.28214	0.649745
M	Vulnerable	0.979385	-1.38689	-1.01274
M	Vulnerable	0.647453	0.424253	0.197817
M	Vulnerable	0.840568	0.762729	-0.51363
M	Vulnerable	0.882576	-0.958628	1.94715
M	Vulnerable	0.396821	1.07234	-0.590677
M	Vulnerable	0.350001	0.442921	0.118135
M	Vulnerable	1.19645	0.489369	0.776494
M	Vulnerable	0.171291	0.514192	0.711644
M	Vulnerable	0.542243	0.548305	0.050637
M	Vulnerable	1.05653	0.333284	0.354459
M	Vulnerable	0.381214	0.652726	0.826948
M	Vulnerable	1.42034	0.729466	0.371921
M	Vulnerable	0.525101	0.333284	1.26592
M	Vulnerable	0.0502121	0.925341	-1.201
M	Vulnerable	1.00093	0.433635	1.61021
M	Vulnerable	1.09133	0.862531	0.472542
M	Vulnerable	0.704478	-0.674722	1.4475
M	Vulnerable	-0.0755619	0.30837	1.41503
M	Vulnerable	0.455819	-1.2055	0.637134
M	Vulnerable	0.959538	1.12122	0.596624
M	Vulnerable	1.4525	1.57537	0.350802
M	Vulnerable	0.188426	1.24743	0.197817
M	Vulnerable	0.288651	0.615762	0.880403
M	Vulnerable	0.650073	1.64396	-0.0701621
M	Vulnerable	0.517163	0.337716	2.16954
M	Vulnerable	0.467053	-0.186493	-0.0590677
M	Vulnerable	0.593482	1.93737	0.563648
M	Vulnerable	0.163972	-0.415629	1.30861
M	Vulnerable	0.893981	0.514192	1.75405
M	Vulnerable	0.0483352	1.21337	-0.607006
M	Vulnerable	0.848813	0.325896	1.49345
M	Vulnerable	0.749842	0.762729	1.07979
M	Vulnerable	1.07367	0.763327	0.658281
M	Vulnerable	0.97797	1.12122	-0.526889
M	Vulnerable	0.638729	-0.606103	2.42178
M	Vulnerable	0.70763	0.141841	0.371921
M	Vulnerable	0.739278	0.433635	1.00204
M	Vulnerable	1.4551	-0.0967598	1.72166
M	Vulnerable	0.859385	0.548305	1.41784
M	Vulnerable	0.44715	-0.234289	2.10272
M	Vulnerable	0.560172	0.337716	1.94484
M	Vulnerable	0.506696	1.16214	1.73185
M	Vulnerable	1.03137	0.0949819	0.959777
M	Vulnerable	0.57973	1.58413	0.221795
M	Vulnerable	1.0731	0.753523	0.197817
M	Vulnerable	-0.126818	-0.0506949	0.581343
M	Vulnerable	0.365607	0.862531	1.35856
M	Vulnerable	2.48942	0.729466	-0.0774836
M	Vulnerable	1.17512	-0.0586715	1.81522
M	Vulnerable	0.775215	1.12122	-0.0774836
M	Vulnerable	1.01068	1.17343	1.57007
M	Vulnerable	1.04755	0.702487	0.581343
M	Vulnerable	0.714221	0.588888	2.10272
M	Vulnerable	0.240679	0.925341	1.72014
M	Vulnerable	0.964599	0.259617	0.959777
M	Vulnerable	-0.50623	0.702487	1.75405
M	Vulnerable	0.547302	2.39988	-0.183164
M	Vulnerable	0.380383	1.08279	2.29321
M	Vulnerable	1.328	0.797888	1.61021
M	Vulnerable	1.44429	1.34427	1.73185
M	Vulnerable	0.993351	1.07908	2.27526
M	Vulnerable	0.560172	1.51297	2.39424
M	Vulnerable	0.763585	1.49195	2.42178
M	Vulnerable	1.23775	2.11837	2.58569
