# Supplementary material for: Large-scale characterization of cocaine addiction-like behaviors reveals that escalation of intake, aversion-resistant responding, and breaking-points are highly correlated measures of the same construct
Source: eLife. 2024 Nov 1;12:RP90422. doi: 10.7554/eLife.90422 (PMC11530236; doi:10.7554/eLife.90422)
Supplement: Figure 4—source data 1. — (A) Z-score for escalation (N=566), (B) motivation (N=512), (C) compulsivity (N=567), and (D) irritability-like behavior (N=380) in the whole population. (E) Combination of A-D and split on vulnerability for PCA analysis with labeling. (F) Combination of A-D, the addiction index and split on vulnerability. [file elife-90422-fig4-data1.xlsx]

## Sheet: Panel A
esc_z_score
0.508164
0.620789
-1.59857
0.316041
-0.724078
0.693663
-0.75389
-2.33394
0.673788
1.40253
0.0311674
-0.127832
-0.0483321
0.832787
-0.00195737
1.07791
-0.306705
0.687038
0.00466758
0.905662
0.349165
-2.20807
-1.16487
0.146307
-0.445544
-1.17398
0.546946
0.628894
-0.217909
-0.272542
0.583367
1.20254
0.228256
-0.67318
-0.272542
-0.636758
0.729054
0.10078
1.33001
0.00972624
1.01132
1.87634
-0.946342
-2.58987
-0.342092
0.192187
0.0807184
0.86484
0.89559
-0.180655
-1.51827
-0.74184
0.518904
-0.211405
0.472779
1.08009
-0.0269061
-2.47921
0.403592
0.219093
-1.31071
0.980152
0.749528
0.903277
0.149906
1.23384
-1.9334
0.436687
0.436687
-2.1191
0.55649
0.769472
0.769472
-1.93274
0.742849
0.396753
-0.555011
0.443343
0.543179
-0.428553
-0.641535
0.410065
1.30858
0.496589
-1.63323
0.972736
-1.78181
1.33762
-1.75319
0.35028
0.428982
-0.00745277
-1.09496
-1.85336
-0.107618
-1.22732
0.335971
-0.472506
1.06575
0.0354752
0.325239
-1.05919
-0.479661
0.450446
0.822488
0.979891
1.30185
0.901189
1.30843
0.716117
0.483076
1.12394
0.881188
-2.964
-0.546191
0.259744
1.33756
0.987999
-0.682132
-0.808363
0.0169926
-0.614161
0.434525
0.949158
-1.31329
0.929738
-0.487931
-0.138368
-0.856913
-0.118948
-0.478221
-0.41996
0.27062
0.249493
-2.14484
0.36921
0.99596
1.81989
-0.757534
-0.222331
-1.38428
0.890328
-2.02512
0.0945659
1.60863
-1.66597
-0.651901
0.348083
0.0734395
0.672022
1.39736
-0.954714
0.319915
-0.0462769
0.291746
0.228367
0.587516
0.129777
0.214282
-0.708239
-0.492144
1.53702
0.750471
0.902493
-0.240977
-0.987868
0.631497
1.02147
-1.13328
0.717423
0.737252
0.334063
-1.04735
0.155602
-1.90661
-1.81407
-1.42411
-0.214538
-0.254196
0.638107
0.20848
1.04791
1.41805
-0.584679
0.903783
-0.458759
0.0540255
-0.0705079
0.141931
0.156582
0.698669
2.38353
0.530183
-1.22061
0.398324
1.18948
-0.61992
0.061351
-0.0558569
-1.94583
-1.93118
-0.39283
1.1382
0.222512
-0.414806
-0.495387
0.991689
-1.26456
0.311488
0.288343
0.481215
-0.683731
0.866959
0.103186
-1.93354
0.0491823
0.936393
-0.984611
0.527504
1.22956
-0.706875
-1.46293
0.288343
-0.467714
0.812955
0.627798
1.19098
1.06755
1.12155
-1.78696
-1.71752
-0.159119
0.406013
0.74865
0.601805
-1.56171
1.32624
0.601805
-0.0638903
0.0731647
1.32624
1.01297
-0.524003
1.18918
-1.50297
-0.876431
-0.847062
1.02276
-0.602321
-1.15054
-1.17991
0.695837
0.780114
-0.155363
0.384011
-2.28758
-0.5009
1.05823
0.662126
0.544138
1.10037
-0.197502
-0.416623
0.737975
-1.04027
0.662126
-0.450333
0.510427
-0.281779
1.04137
-1.84934
0.603132
-2.06846
0.468288
-0.718214
0.628486
0.519139
-1.35703
0.208362
-1.38581
0.524894
1.18673
0.755099
-0.608866
-1.22467
0.5882
-1.31675
-1.06928
-1.31675
0.703303
1.09465
0.651507
1.09177
1.49176
-1.02899
0.582445
0.33653
0.525101
-0.614896
-0.872038
-0.306326
-0.246326
-0.340611
-0.452039
1.07367
-0.932038
-0.872038
0.5851
1.05653
0.979385
0.859385
1.4551
0.542243
0.542243
0.285101
-0.623468
-2.9806
0.906446
0.339528
0.499428
-0.118368
-0.0820267
-0.180147
1.328
-0.539922
0.455819
0.739278
-0.67075
0.41221
0.43038
0.288651
0.506696
1.44429
-1.68103
-1.2522
-1.92815
-1.89907
1.00093
0.57973
-1.4446
0.840568
0.0750652
0.749842
0.704478
-1.42759
-1.28583
1.06171
-1.4446
-0.350214
0.602411
1.17512
0.29054
-1.45027
1.01635
0.772523
-1.4446
1.01068
0.216825
-0.248147
-0.85297
-1.01886
-1.01272
0.123941
0.0502121
-0.545765
0.70763
-0.98814
0.775215
-1.01886
0.560172
0.97797
-1.04344
0.517163
-1.04344
-1.00657
-1.04344
-0.791529
0.959538
1.49407
-0.152543
0.240679
-0.945131
1.16229
0.560172
1.42034
2.48942
-1.04958
0.474155
0.650073
-2.07808
-0.126818
0.198392
0.704275
-1.38249
0.848813
0.993351
0.162258
-0.50623
-0.208121
0.379065
0.993351
0.677174
0.740409
-2.17745
-0.325558
0.171291
0.893981
1.04755
-1.60833
0.632006
0.622972
0.333896
0.189359
-1.82514
-0.315096
-1.47147
-1.38061
-1.56233
0.882576
1.23775
-1.56233
0.535664
0.568703
0.6926
-0.108601
0.163972
-0.17468
-1.53755
-1.41365
1.4525
-0.480292
1.68378
1.19645
0.230051
-0.860243
0.0483352
0.0152959
0.758678
0.882576
0.593482
-0.0755619
0.982082
-1.78035
-1.84278
-0.321099
0.763585
0.646533
1.0211
0.638729
-0.0245665
1.09133
1.06012
-1.84278
0.350001
-1.51503
0.467053
-1.31994
-0.305492
0.381214
0.740174
0.139307
-1.8896
0.638729
0.131503
0.396821
0.365607
0.833816
0.193931
-1.75618
-1.68941
-0.00353098
0.597377
0.188426
0.44715
-0.888202
-0.0452607
0.714221
0.163388
0.338653
-0.779704
0.739259
-1.75618
0.647453
0.931215
0.655799
0.271885
0.964599
-1.82295
1.03137
0.547302
0.380383
1.0731
-1.82295
0.872794
1.3317
-0.569418
-0.753101
-1.1572
0.183683
-1.17557
-0.275525
1.75417
0.0459208
-0.716364
-0.697996
-1.13884
-1.16639
-0.477576
0.789837
1.44191
1.17557
-0.780653
1.29497
1.12965
0.688812
0.238788
-1.16639
0.460074
-0.0864381
0.78352
-3.19821
0.772366
0.794673
-0.521417
-0.0195183
-0.342964
1.37464
-1.19062
-0.432191
0.0808615
-0.0195183
-0.443344
0.839286
0.00278833
1.36349
0.0250949
-0.242584
-0.361254
-2.01814
0.786487
1.55452
0.337746
-1.6557
-1.90596
0.795117
0.829635
1.16619
0.398153
1.01949
1.23523
0.0529681
-0.0419579
-0.576995
0.734709
0.441302
0.329116
-1.29325
-0.0419579
0.0443385
-1.07751
-1.00848
0.0529681
-1.60392
0.527598
0.924561
0.355005

## Sheet: Panel B
pr_z_score
-2.47632
-2.44953
-2.40047
-2.1781
-2.1781
-2.03196
-2.02421
-1.99498
-1.93365
-1.93365
-1.91996
-1.91996
-1.81733
-1.81733
-1.81733
-1.81693
-1.81693
-1.78601
-1.78601
-1.74535
-1.74218
-1.70977
-1.70977
-1.7003
-1.7003
-1.7003
-1.65513
-1.60407
-1.56733
-1.56733
-1.55706
-1.55706
-1.55137
-1.55137
-1.55137
-1.52349
-1.52349
-1.49612
-1.49612
-1.4917
-1.4917
-1.4917
-1.48362
-1.48362
-1.48362
-1.48362
-1.47908
-1.46261
-1.46261
-1.46261
-1.44532
-1.44532
-1.44532
-1.40794
-1.38689
-1.38674
-1.38674
-1.3599
-1.3599
-1.3599
-1.3599
-1.3599
-1.34234
-1.33721
-1.33721
-1.31315
-1.30524
-1.29077
-1.29077
-1.24855
-1.24855
-1.24608
-1.23552
-1.23552
-1.22928
-1.22928
-1.22928
-1.22928
-1.22928
-1.22928
-1.2221
-1.2055
-1.2055
-1.2055
-1.2055
-1.2055
-1.19423
-1.16526
-1.16336
-1.13792
-1.13792
-1.12
-1.12
-1.11877
-1.11877
-1.08916
-1.08542
-1.05747
-1.03341
-1.03341
-1.02571
-1.02338
-1.02338
-0.964655
-0.964655
-0.964298
-0.958628
-0.958628
-0.958628
-0.958628
-0.958628
-0.958348
-0.929772
-0.880072
-0.841252
-0.840494
-0.840494
-0.840494
-0.840494
-0.840494
-0.840494
-0.837535
-0.837535
-0.837535
-0.792222
-0.780064
-0.778377
-0.777628
-0.777628
-0.777628
-0.777628
-0.751432
-0.751432
-0.75104
-0.745849
-0.697209
-0.67554
-0.67554
-0.67554
-0.674722
-0.667888
-0.659125
-0.64166
-0.641201
-0.641201
-0.641201
-0.641201
-0.641201
-0.619374
-0.615581
-0.610993
-0.606103
-0.606103
-0.606103
-0.596628
-0.596628
-0.596628
-0.596628
-0.559387
-0.547058
-0.544516
-0.537782
-0.531535
-0.526803
-0.524755
-0.469372
-0.447447
-0.447447
-0.445785
-0.441909
-0.441909
-0.441909
-0.441833
-0.427286
-0.415629
-0.415629
-0.415629
-0.404046
-0.372925
-0.365862
-0.365862
-0.319993
-0.292214
-0.29029
-0.29029
-0.273677
-0.268468
-0.264022
-0.242617
-0.23899
-0.23899
-0.234289
-0.215779
-0.215779
-0.215779
-0.186493
-0.186493
-0.17677
-0.17677
-0.142219
-0.142219
-0.130684
-0.130684
-0.111265
-0.100828
-0.0967598
-0.0967598
-0.0894894
-0.0894894
-0.0894894
-0.0894894
-0.0810456
-0.0810456
-0.0810456
-0.0696534
-0.0696534
-0.0586715
-0.055825
-0.055825
-0.0506949
-0.0345153
-0.033264
-0.033264
0
0.0102752
0.0233116
0.0265649
0.0265649
0.0265649
0.0505057
0.0720202
0.0720202
0.0762322
0.0894894
0.0949819
0.0949819
0.101993
0.12737
0.131158
0.131158
0.137601
0.137601
0.141841
0.141841
0.146679
0.146679
0.151961
0.151961
0.151961
0.153014
0.153014
0.155968
0.17864
0.17864
0.185954
0.186462
0.233116
0.233116
0.236329
0.236329
0.244869
0.251508
0.259617
0.259617
0.259617
0.277782
0.277782
0.277782
0.277782
0.277782
0.296831
0.296831
0.30837
0.315251
0.315251
0.315251
0.325896
0.325896
0.325896
0.333284
0.333284
0.333284
0.333284
0.333284
0.337716
0.337716
0.339293
0.339293
0.352029
0.384967
0.384967
0.384967
0.384967
0.391102
0.391102
0.413105
0.413105
0.413105
0.413105
0.417717
0.417717
0.417717
0.424253
0.424253
0.424253
0.424253
0.433635
0.433635
0.433635
0.442921
0.442921
0.447447
0.447447
0.447447
0.447447
0.462384
0.462384
0.462384
0.462505
0.489369
0.489369
0.504733
0.504733
0.504733
0.505057
0.514192
0.514192
0.514192
0.525571
0.525571
0.525571
0.528509
0.528509
0.528509
0.528509
0.528509
0.533591
0.548305
0.548305
0.548305
0.548305
0.548305
0.554553
0.559387
0.559387
0.568876
0.568876
0.568876
0.588888
0.588888
0.590566
0.590566
0.615762
0.615762
0.617973
0.617973
0.617973
0.626426
0.626426
0.628178
0.64757
0.64757
0.652726
0.664123
0.664123
0.664123
0.670369
0.688438
0.688438
0.688438
0.69698
0.69698
0.69698
0.69698
0.69698
0.702487
0.702487
0.702487
0.702487
0.711849
0.711849
0.711849
0.711849
0.729466
0.729466
0.729466
0.729466
0.732333
0.732333
0.732333
0.741768
0.741768
0.741768
0.745849
0.745849
0.745849
0.745849
0.745849
0.746649
0.746649
0.753523
0.753523
0.753845
0.762729
0.762729
0.762729
0.763327
0.763414
0.793852
0.793852
0.797888
0.797888
0.805405
0.805405
0.823512
0.850979
0.851369
0.862531
0.862531
0.862531
0.862531
0.882035
0.890782
0.898127
0.898127
0.898127
0.903896
0.903896
0.903896
0.914492
0.924423
0.924423
0.924423
0.925341
0.925341
0.932312
0.932312
0.936263
0.936263
0.955026
0.955026
0.959525
0.959525
0.959525
0.968079
0.984384
0.984384
1.07234
1.07234
1.07908
1.07908
1.08279
1.08398
1.08441
1.1165
1.1165
1.12122
1.12122
1.12122
1.14055
1.14055
1.14229
1.14229
1.14229
1.16214
1.16214
1.17343
1.17343
1.17343
1.18688
1.18688
1.19337
1.21337
1.24743
1.27068
1.28214
1.28214
1.30524
1.31699
1.34427
1.35172
1.3666
1.40839
1.45481
1.45481
1.45696
1.45774
1.4917
1.49195
1.51297
1.52639
1.55
1.55101
1.57537
1.58413
1.58543
1.5948
1.62222
1.62766
1.64396
1.73156
1.75031
1.75031
1.75637
1.90472
1.93737
1.93924
1.9496
1.95357
2.11837
2.39988
2.41621

## Sheet: Panel C
shock_z_score
1.2416
1.2416
-1.16214
0.0397313
-1.2714
-0.0695298
-0.506574
-1.59918
0.148992
-0.397313
1.35086
0.367515
0.586037
-1.05288
2.11569
-0.397313
0.804559
-0.834357
0.586037
0.476776
-0.288052
-1.38066
-0.716537
-0.0360846
-0.603129
0.304142
0.304142
-0.716537
-0.149493
0.530959
0.984595
0.304142
-1.28358
1.32482
-0.48972
-1.17017
-1.17017
-0.376311
0.530959
-0.149493
1.55164
2.68573
-1.17017
-0.48972
-0.0913125
-1.14141
-1.92898
0.696258
0.82752
-0.485098
-0.878883
0.302473
1.09004
-0.0913125
0.171211
-1.40393
0.564996
-0.353836
-0.485098
-0.747621
-1.01014
0.696258
0.302473
0.958781
2.14014
1.61509
-0.747621
0.30063
0.535905
-2.16976
0.30063
0.888819
1.00646
-0.522834
0.418268
-0.993385
-1.11102
0.888819
0.653543
0.182992
-1.11102
-1.69921
0.888819
0.771181
0.771181
0.290539
-1.35015
0.495625
-1.24761
2.23886
-0.529806
1.11088
-0.222177
-1.14506
-0.734892
-0.529806
1.72614
0.0854526
-0.427263
1.00834
-1.24761
0.0854526
-0.427263
-0.32472
0.0854526
0.905797
1.6236
-0.734892
2.13272
0.333237
-0.866416
-0.0666474
-0.266589
-1.66618
-0.466531
0.333237
1.133
0.333237
-1.66618
-0.666474
-1.06636
-1.2663
0.733121
1.73283
0.333237
1.33295
-0.866416
0.333237
-0.0666474
-0.466531
-0.0666474
0.733121
0.275582
-1.06638
-0.954551
-0.50723
1.28205
-0.61906
-1.1223
-0.059909
2.12078
-0.954551
-1.1223
0.611072
-1.01047
2.34444
-1.1223
0.946563
0.163751
-0.954551
-0.00399394
0.778818
0.163751
-0.73089
-1.01047
1.17022
0.0519212
1.00248
0.331497
-0.00399394
1.34421
0.629945
0.0347214
-0.679547
-1.15573
-1.39382
0.153766
0.153766
-0.798592
-0.0843234
-0.322413
-0.679547
-1.03668
0.629945
-1.03668
-0.679547
-0.798592
0.868035
-0.798592
1.82039
1.10612
0.868035
2.29657
-0.441458
1.48693
0.888164
0.648659
-0.189608
-1.02787
1.12767
-0.429113
0.528907
-1.26738
-0.908123
0.888164
-0.429113
1.48693
2.44495
-1.26738
-0.548865
0.0498968
-0.30936
-0.548865
-0.0698556
-0.30936
-1.38713
0.0498968
-0.908123
-0.324285
-0.934704
-0.47689
-0.934704
0.743948
-0.782099
-0.324285
-0.629494
-0.400587
-0.782099
-0.0953779
1.27806
-0.17168
-0.0190756
3.18562
-0.934704
0.591343
0.972855
1.58327
-0.553192
-0.0953779
-0.782099
0.667646
-0.782099
0.0969994
0.360283
-0.100464
0.689388
-0.49539
0.16282
0.755209
0.886851
-0.627032
-0.956137
-1.28524
0.0311784
-1.28524
-0.0346426
0.886851
0.0311784
-0.363748
-1.54853
2.79566
-1.06794
0.357197
-1.06794
0.357197
-1.06794
-0.39729
1.11168
-1.06794
0.692524
-0.648786
-0.900281
0.441028
1.69851
-0.481122
1.86617
1.11168
1.11168
-0.984113
0.273365
-0.481122
1.19551
-0.984113
-1.06794
-0.301784
-0.437279
-0.437279
-0.708268
-0.708268
0.104701
0.917669
-0.708268
-0.708268
0.37569
-0.572773
2.54361
-0.572773
-0.0307943
-0.166289
-0.708268
1.32415
-0.437279
2.6791
-0.572773
-0.572773
-0.301784
-0.253185
1.26592
-0.405096
-1.01274
0.50637
-1.16465
-0.708918
-0.860828
0.658281
-0.557007
0.50637
-0.557007
0.354459
-1.01274
1.41784
1.72166
-0.101274
0.050637
2.17739
-0.860828
-1.16465
-0.700847
-0.700847
-0.335943
-0.944116
-0.822482
-0.822482
1.61021
-0.944116
0.637134
1.00204
-0.700847
-0.457578
-0.457578
0.880403
1.73185
1.73185
-0.700847
-0.335943
-0.822482
-0.457578
1.61021
0.221795
-1.37163
-0.51363
0.344366
1.07979
1.4475
-1.00391
0.95722
0.95722
0.344366
-0.881343
-0.881343
1.81522
-0.268488
0.099224
-1.37163
-0.268488
-1.24906
1.57007
-0.391059
-0.636201
0.596624
-0.751591
-1.201
-0.0774836
-1.201
-0.0774836
0.371921
-0.302186
-0.0774836
-0.302186
2.39424
-0.526889
-0.751591
2.16954
-0.976294
-0.751591
-0.976294
0.596624
0.596624
-0.0774836
0.371921
1.72014
-0.751591
-0.976294
1.94484
0.371921
-0.0774836
-0.526889
-0.751591
-0.0701621
-0.98227
0.581343
0.19044
-0.721668
-0.330764
1.49345
-0.98227
-0.330764
1.75405
1.23285
-0.721668
2.27526
-0.721668
-0.591366
-1.24287
-0.0701621
0.711644
1.75405
0.581343
-0.851969
0.060139
-0.98227
-0.591366
-0.721668
-0.721668
-0.713429
-0.607006
-1.13912
-1.0327
1.94715
2.58569
-1.0327
-0.607006
0.0315328
0.0315328
0.457225
1.30861
-0.819852
-0.926275
-0.0748903
0.350802
-0.819852
-0.819852
0.776494
0.670071
-1.0327
-0.607006
0.563648
0.350802
-0.819852
0.563648
1.41503
-1.12229
-0.945084
-1.12229
-0.945084
2.42178
0.649745
-0.945084
2.42178
-0.413474
0.472542
-0.0590677
-0.590677
0.118135
-0.413474
-0.0590677
1.18135
-0.76788
0.826948
-0.945084
0.649745
-0.945084
-0.590677
0.472542
-0.590677
1.35856
-0.236271
0.118135
-0.754634
-0.564144
0.388307
-0.373654
0.197817
2.10272
-0.945124
-0.564144
2.10272
0.388307
-0.564144
-0.754634
-1.3261
-0.945124
0.197817
-0.373654
-0.183164
0.388307
0.959777
-1.13561
0.959777
-0.183164
2.29321
0.197817
-0.945124
-0.564144
-0.469142
-0.572894
-0.157884
-0.676647
-0.676647
-0.572894
0.568383
-0.365389
-0.676647
-0.676647
-0.365389
-0.469142
-0.780399
-0.261637
-0.572894
-0.676647
1.3984
-0.157884
3.05844
1.1909
1.29465
1.3984
-0.780399
0.391836
-0.097959
1.49387
-1.07755
-0.710203
0.881631
-0.832651
-1.2
0.146938
1.00408
-0.342856
-0.587754
-0.097959
1.98367
-1.32245
-0.9551
-0.9551
1.49387
-0.097959
0.881631
-1.05198
-0.886178
-0.388775
0.937634
-0.554576
-1.05198
-0.720377
-0.720377
-0.720377
-0.222974
0.274429
0.606032
0.440231
-0.720377
-0.886178
1.10344
1.43504
0.937634
-0.388775
1.60084
1.26924
2.59565
-1.54938
-1.05198
0.440231
-1.05198
0.108628
-0.0571728
0.274429
-0.734892

## Sheet: Panel D
irr_z_score
3.40122
3.26809
3.18706
3.13033
3.04895
2.94826
2.81902
2.73327
2.54022
2.47639
2.33102
2.1489
2.12481
2.12302
2.10535
2.09783
2.09096
2.03322
2.00426
2.00253
1.92917
1.91301
1.87726
1.84828
1.84649
1.83037
1.81971
1.81117
1.77329
1.76572
1.76572
1.74659
1.71155
1.70949
1.68649
1.66315
1.59274
1.50135
1.49227
1.45678
1.41507
1.41083
1.40516
1.38096
1.34439
1.328
1.29253
1.28203
1.24601
1.2425
1.22868
1.2218
1.19724
1.12613
1.09849
1.08656
1.05593
1.05189
1.01894
0.983646
0.982372
0.982372
0.982372
0.970726
0.963177
0.937439
0.930987
0.930987
0.918661
0.918661
0.877348
0.864628
0.851186
0.837781
0.821872
0.821872
0.806612
0.796671
0.781881
0.719007
0.710919
0.710763
0.710763
0.701031
0.701031
0.692284
0.68085
0.67901
0.678158
0.634886
0.633607
0.613231
0.573385
0.568974
0.568974
0.553993
0.553993
0.552222
0.552222
0.542972
0.542972
0.540704
0.50513
0.50513
0.503445
0.500574
0.489014
0.479372
0.465938
0.465938
0.465938
0.464433
0.455092
0.455092
0.427763
0.427763
0.42139
0.418616
0.410375
0.404193
0.404193
0.402142
0.402142
0.379653
0.367212
0.357193
0.357193
0.345563
0.342756
0.331092
0.324987
0.311315
0.300168
0.300168
0.293368
0.282142
0.275138
0.275138
0.247832
0.240794
0.230422
0.207083
0.194496
0.150421
0.149529
0.149529
0.13652
0.109536
0.109536
0.109536
0.0935214
0.0894525
0.0686363
0.0646884
0.0637094
0.0601986
0.0452029
0.0313608
0.0163662
0.0163662
0.0156928
0.0136969
0.00466335
0.00466335
0.00466335
-0.00843762
-0.0122565
-0.0122565
-0.0139539
-0.0300993
-0.0300993
-0.0364436
-0.0399418
-0.0447199
-0.0465695
-0.0582415
-0.0582415
-0.0657497
-0.0721871
-0.100468
-0.100468
-0.100468
-0.100468
-0.106836
-0.106836
-0.106836
-0.118127
-0.120397
-0.120397
-0.120397
-0.120397
-0.120397
-0.121226
-0.127062
-0.127062
-0.130574
-0.137944
-0.137944
-0.142291
-0.15469
-0.154723
-0.154723
-0.159767
-0.16234
-0.167102
-0.167102
-0.167102
-0.167102
-0.174042
-0.174042
-0.176702
-0.22434
-0.227369
-0.227369
-0.237446
-0.245361
-0.247947
-0.265811
-0.265811
-0.265811
-0.273496
-0.273496
-0.279592
-0.279592
-0.287655
-0.288236
-0.292254
-0.335827
-0.337432
-0.343131
-0.351184
-0.351184
-0.36366
-0.391291
-0.391291
-0.39691
-0.39691
-0.398608
-0.399418
-0.399418
-0.410631
-0.416651
-0.435002
-0.435002
-0.435002
-0.435002
-0.445966
-0.446524
-0.446524
-0.446565
-0.447194
-0.447194
-0.454084
-0.468435
-0.481959
-0.481959
-0.497613
-0.50956
-0.511587
-0.518777
-0.518777
-0.519243
-0.519243
-0.528701
-0.532573
-0.533038
-0.540028
-0.540028
-0.556883
-0.565037
-0.565037
-0.571886
-0.588968
-0.591588
-0.600258
-0.600258
-0.600258
-0.602976
-0.603904
-0.619552
-0.620513
-0.620513
-0.630144
-0.630144
-0.639068
-0.639068
-0.649234
-0.655764
-0.662184
-0.664398
-0.671523
-0.67599
-0.685457
-0.687346
-0.703135
-0.706066
-0.727714
-0.727714
-0.728873
-0.737209
-0.739141
-0.739698
-0.739698
-0.740292
-0.742049
-0.742049
-0.752482
-0.752482
-0.752482
-0.755185
-0.755185
-0.755185
-0.755185
-0.758894
-0.758894
-0.77506
-0.77506
-0.786942
-0.80676
-0.80676
-0.812824
-0.821184
-0.825285
-0.828334
-0.830034
-0.83234
-0.836856
-0.84278
-0.8903
-0.897895
-0.909496
-0.917717
-0.941997
-0.953371
-0.954264
-0.955155
-0.955642
-0.959076
-0.98297
-0.98297
-0.986651
-0.995639
-0.995639
-1.04387
-1.05212
-1.06381
-1.06432
-1.07723
-1.08719
-1.10126
-1.118
-1.14476
-1.14485
-1.17347
-1.21247
-1.21463
-1.22307
-1.22515
-1.23246
-1.25158
-1.2519
-1.28623
-1.28814
-1.29541
-1.31267
-1.38743
-1.39251
-1.39818
-1.47785
-1.53813
-1.54665
-1.63011
-1.63011
-1.65403
-1.69118
-2.00554
-2.0937
-2.25644
-2.36199

## Sheet: Panel E
split	esc_z_score	pr_z_score	shock_z_score	irr_z_score
Resilient	-2.1191	-2.44953	-2.16976	-0.758894
Resilient	-2.9806	-1.81693	-1.16465	-1.23246
Resilient	-2.17745	-1.93365	-1.24287	-0.83234
Resilient	-1.13328	-1.7003	-0.798592	-2.25644
Resilient	-2.964	-1.48362	-1.66618	0.465938
Resilient	-2.07808	-1.55706	-0.98227	-0.986651
Resilient	-1.82295	-1.38674	-0.945124	-1.39251
Resilient	-1.85336	-1.81733	-1.14506	-0.727714
Vulnerable	-0.946342	-2.47632	-1.17017	-0.649234
Resilient	-1.8896	-1.65513	-0.945084	-0.740292
Resilient	-2.58987	-2.02421	-0.48972	-0.106836
Resilient	-1.82514	-1.74535	-0.721668	-0.909496
Resilient	-1.78181	-1.60407	-1.35015	-0.435002
Resilient	-2.47921	-2.1781	-0.353836	-0.120397
Resilient	-1.4446	-1.08542	-1.24906	-1.04387
Resilient	-1.4446	-1.49612	-1.37163	-0.416651
Resilient	-1.60833	-1.93365	-0.851969	-0.137944
Vulnerable	-1.31071	-2.1781	-1.01014	-0.0300993
Vulnerable	-0.872038	-1.81693	-1.01274	-0.728873
Resilient	-1.75618	-1.2221	-0.945124	-0.445966
Resilient	-1.68941	-1.55137	-0.564144	-0.518777
Resilient	-1.42411	-1.7003	-0.798592	-0.36366
Resilient	-1.04344	-1.22928	-0.976294	-0.941997
Resilient	-1.75319	-0.75104	-1.24761	-0.435002
Resilient	-1.78035	-1.44532	-0.945084	-0.0122565
Resilient	-1.04344	-1.22928	-0.751591	-1.14485
Vulnerable	-0.757534	-1.52349	-1.1223	-0.67599
Resilient	-1.53755	-0.596628	-0.926275	-0.995639
Resilient	-1.94583	-0.929772	-0.548865	-0.619552
Resilient	-1.05919	-0.964298	0.0854526	-2.0937
Resilient	-1.26456	-1.56733	-0.908123	-0.273496
Resilient	-1.56233	-0.958628	-1.0327	-0.410631
Resilient	-1.42759	-1.29077	-1.00391	-0.237446
Resilient	-1.38061	-0.958628	-1.13912	-0.447194
Resilient	-1.22732	-1.81733	-0.529806	-0.337432
Resilient	-0.779704	-1.38674	-0.754634	-0.955642
Vulnerable	-0.0558569	-1.24855	-1.26738	-1.22515
Resilient	-1.22061	-1.56733	-0.908123	-0.100468
Vulnerable	-0.614161	-1.48362	-1.2663	-0.39691
Resilient	-2.02512	-0.033264	-1.1223	-0.565037
Resilient	-1.81407	-1.34234	-0.679547	0.109536
Resilient	-1.01272	-1.22928	-1.201	-0.265811
Resilient	-1.9334	-0.780064	-0.747621	-0.120397
Resilient	-1.84278	-1.44532	-0.590677	0.311315
Resilient	-1.4446	-1.49612	0.344366	-0.954264
Resilient	-1.89907	-1.2055	-0.457578	0.0156928
Resilient	-1.93274	-1.99498	-0.522834	0.918661
Vulnerable	-0.856913	-1.48362	-0.0666474	-1.08719
Vulnerable	-0.708239	-1.70977	-0.00399394	-1.06432
Resilient	-1.04958	-1.22928	-0.526889	-0.671523
Resilient	-1.92815	-1.2055	-0.822482	0.542972
Resilient	-1.09496	-1.81733	-0.222177	-0.142291
Resilient	-1.01886	-1.22928	-0.751591	-0.265811
Resilient	-1.93118	-1.24855	0.0498968	-0.0139539
Vulnerable	0.982082	-1.23552	-1.12229	-1.63011
Vulnerable	0.249493	-1.70977	-1.06638	-0.454084
Vulnerable	-0.452039	-2.03196	-0.860828	0.404193
Resilient	-1.90661	-1.7003	-1.03668	1.76572
Resilient	-1.56233	-0.777628	-1.0327	0.503445
Resilient	-1.04344	-1.22928	-0.976294	0.410375
Resilient	-0.860243	-0.777628	-1.0327	-0.15469
Vulnerable	-0.539922	-1.2055	-0.944116	-0.0721871
Vulnerable	-0.555011	-0.404046	-1.11102	-0.639068
Resilient	-1.75618	-1.05747	-0.754634	0.864628
Vulnerable	-0.118368	-1.2055	-0.944116	-0.335827
Vulnerable	-0.682132	-0.792222	-1.66618	0.552222
Vulnerable	-0.932038	-0.526803	-0.557007	-0.540028
Resilient	-0.945131	-0.837535	-0.751591	0.00466335
Vulnerable	0.0807184	-0.0810456	-1.92898	-0.571886
Vulnerable	-1.17398	-1.12	0.304142	-0.468435
Vulnerable	-0.74184	-1.24608	0.302473	-0.752482
Vulnerable	-1.31329	0.244869	0.333237	-1.69118
Vulnerable	-0.487931	-1.48362	-0.866416	0.465938
Vulnerable	0.338653	-1.55137	-0.564144	-0.591588
Vulnerable	-0.315096	-0.777628	-0.713429	-0.556883
Resilient	-1.84278	-1.23552	-1.12229	1.84828
Resilient	-2.14484	-0.033264	-0.954551	0.821872
Resilient	-1.00657	-0.837535	-0.751591	0.342756
Resilient	-0.987868	-1.16336	-1.39382	1.29253
Vulnerable	-0.414806	-1.40794	-0.30936	-0.100468
Resilient	-1.41365	-0.596628	-0.0748903	-0.118127
Resilient	-1.2522	-1.02338	-0.335943	0.455092
Vulnerable	-0.954714	-1.52349	0.778818	-0.398608
Vulnerable	-0.584679	-0.447447	-0.441458	-0.600258
Vulnerable	-0.248147	0.146679	-0.636201	-1.31267
Vulnerable	-1.16487	0.0102752	-0.716537	-0.106836
Resilient	-0.888202	0.424253	-0.945124	-0.518777
Resilient	-0.791529	-0.837535	0.596624	-0.80676
Resilient	-1.51827	1.31699	-0.878883	-0.752482
Resilient	-1.04735	-0.447447	-1.03668	0.701031
Vulnerable	-0.39283	-0.610993	-0.30936	-0.446524
Vulnerable	-0.305492	-0.606103	-0.76788	-0.0122565
Vulnerable	-0.495387	0.504733	-1.38713	-0.273496
Vulnerable	-0.808363	0.590566	-0.666474	-0.655764
Vulnerable	-0.246326	1.19337	-1.16465	-1.29541
Vulnerable	-0.479661	0.528509	-0.427263	-1.118
Resilient	-1.51503	-0.186493	-0.413474	0.634886
Resilient	-1.82295	-1.55137	-1.13561	3.04895
Resilient	-0.98814	-0.445785	-0.302186	0.275138
Resilient	-1.68103	-0.841252	-0.700847	1.77329
Vulnerable	0.36921	-0.964655	-0.50723	-0.343131
Vulnerable	-0.217909	-0.215779	-0.149493	-0.830034
Vulnerable	-0.614896	0.548305	-0.405096	-0.917717
Resilient	-1.28583	-0.264022	0.95722	-0.77506
Vulnerable	-0.340611	0.333284	-0.708918	-0.602976
Vulnerable	0.872794	-0.0696534	-0.564144	-1.53813
Vulnerable	0.410065	0.277782	-1.69921	-0.279592
Vulnerable	-0.0452607	0.424253	-0.564144	-1.10126
Vulnerable	0.379065	-1.55706	-0.721668	0.633607
Vulnerable	-0.641535	-0.17677	-1.11102	0.67901
Vulnerable	-0.67075	-0.659125	-0.700847	0.806612
Vulnerable	0.339528	0.797888	-0.700847	-1.65403
Vulnerable	0.192187	0.151961	-1.14141	-0.391291
Vulnerable	0.749528	-1.47908	0.302473	-0.752482
Resilient	-1.01886	-1.03341	-0.302186	1.2218
Resilient	-1.47147	-0.777628	-0.607006	1.74659
Vulnerable	-0.636758	0.688438	-1.17017	0.0136969
Vulnerable	-0.0462769	0.339293	-0.73089	-0.620513
Vulnerable	0.729054	-0.441833	-1.17017	-0.167102
Vulnerable	-0.180147	-1.02338	-0.822482	0.982372
Vulnerable	0.450446	-0.537782	-0.32472	-0.630144
Resilient	-1.38249	-0.615581	-0.330764	1.328
Vulnerable	0.193931	-1.44532	0.118135	0.149529
Vulnerable	0.291746	0.525571	-1.01047	-0.786942
Vulnerable	0.333896	-0.23899	-0.591366	-0.446565
Vulnerable	1.60863	-1.33721	-1.01047	-0.176702
Vulnerable	0.123941	0.141841	-0.0774836	-1.07723
Vulnerable	-0.272542	-0.215779	0.530959	-0.8903
Vulnerable	0.496589	-1.31315	0.771181	-0.758894
Vulnerable	0.146307	-0.667888	-0.0360846	-0.227369
Vulnerable	0.474155	0.729466	-0.751591	-1.21247
Resilient	-1.63323	0.505057	0.771181	-0.399418
Vulnerable	-0.321099	0.442921	-0.945084	0.0686363
Resilient	-1.45027	-1.29077	0.099224	1.91301
Vulnerable	0.499428	1.16214	-0.335943	-2.00554
Resilient	-0.85297	-1.03341	0.596624	0.613231
Vulnerable	0.628894	0.688438	-0.716537	-1.2519
Vulnerable	0.739259	0.0949819	-1.3261	-0.154723
Resilient	-0.152543	-0.64166	0.371921	-0.130574
Vulnerable	-0.472506	-0.111265	0.0854526	-0.0447199
Vulnerable	0.0152959	-0.415629	0.563648	-0.703135
Vulnerable	1.08009	-0.0810456	-1.40393	-0.120397
Vulnerable	-0.428553	0.277782	0.182992	-0.519243
Vulnerable	1.12394	-1.13792	-0.0666474	-0.39691
Vulnerable	0.535664	0.851369	-0.607006	-1.25158
Vulnerable	-0.214538	-0.268468	0.868035	-0.836856
Vulnerable	1.06012	0.233116	-0.0590677	-1.63011
Vulnerable	0.334063	0.0894894	-0.679547	-0.127062
Vulnerable	-0.623468	0.333284	-0.860828	0.781881
Vulnerable	-0.17468	0.670369	-0.819852	-0.00843762
Vulnerable	-0.118948	0.0720202	-0.466531	0.207083
Vulnerable	0.758678	-0.596628	0.350802	-0.812824
Vulnerable	-0.108601	-0.958628	0.457225	0.357193
Vulnerable	0.29054	0.968079	-0.268488	-1.22307
Vulnerable	-0.325558	-0.23899	-0.0701621	0.402142
Vulnerable	1.49407	0.729466	-0.0774836	-2.36199
Vulnerable	0.403592	-0.0810456	-0.485098	-0.0300993
Vulnerable	-0.107618	0.315251	-0.734892	0.345563
Vulnerable	0.198392	0.514192	0.19044	-1.06381
Vulnerable	0.993351	0.137601	-0.98227	-0.292254
Vulnerable	0.0734395	0.153014	0.163751	-0.50956
Vulnerable	0.219093	-0.547058	-0.747621	0.963177
Vulnerable	-0.272542	0.462384	-0.48972	0.194496
Vulnerable	0.189359	0.137601	-0.721668	0.324987
Vulnerable	0.901189	0.528509	-0.734892	-0.727714
Vulnerable	0.740174	0.0233116	-0.945084	0.149529
Vulnerable	0.622972	0.325896	-0.98227	0.0163662
Vulnerable	-0.342092	1.08398	-0.0913125	-0.662184
Vulnerable	0.99596	-0.964655	1.28205	-1.28623
Vulnerable	-0.254196	0.984384	-0.798592	0.109536
Vulnerable	1.01635	1.17343	-1.37163	-0.77506
Vulnerable	-0.240977	2.41621	-1.15573	-0.955155
Vulnerable	0.222512	0.0265649	-0.0698556	-0.100468
Vulnerable	0.10078	0.462384	-0.376311	-0.106836
Vulnerable	0.546946	-0.215779	0.304142	-0.528701
Vulnerable	0.162258	-0.427286	-0.330764	0.710763
Vulnerable	0.33653	0.333284	-0.253185	-0.288236
Vulnerable	-0.651901	1.08441	-1.1223	0.821872
Vulnerable	0.906446	0.615762	-0.700847	-0.687346
Vulnerable	1.0211	0.233116	-0.945084	-0.174042
Vulnerable	0.638729	1.07234	-0.590677	-0.98297
Vulnerable	-0.445544	1.3666	-0.603129	-0.167102
Resilient	-0.480292	0.12737	-0.819852	1.38096
Vulnerable	0.436687	0.732333	0.535905	-1.47785
Vulnerable	-0.00353098	0.588888	0.388307	-0.737209
Vulnerable	-0.0245665	-0.606103	-0.413474	1.28203
Vulnerable	0.632006	0.325896	0.060139	-0.755185
Vulnerable	-0.0705079	0.664123	-0.189608	-0.100468
Vulnerable	0.0169926	0.417717	-1.06636	0.983646
Vulnerable	1.81989	-1.33721	-0.61906	0.489014
Vulnerable	0.428982	0.315251	-0.529806	0.150421
Vulnerable	0.6926	-0.415629	0.0315328	0.0646884
Vulnerable	0.483076	-0.619374	-0.866416	1.41507
Vulnerable	0.672022	1.27068	-0.954551	-0.565037
Vulnerable	-0.350214	-0.880072	-0.881343	2.54022
Vulnerable	0.740409	1.07908	-0.591366	-0.755185
Vulnerable	0.131503	0.862531	0.472542	-0.98297
Vulnerable	0.436687	0.277782	0.30063	-0.519243
Resilient	-1.31994	-1.02571	1.18135	1.68649
Vulnerable	0.259744	0.763414	0.333237	-0.828334
Vulnerable	0.991689	0.0265649	0.0498968	-0.533038
Vulnerable	-0.211405	0.617973	-0.0913125	0.240794
Vulnerable	-0.00745277	0.315251	1.11088	-0.825285
Vulnerable	1.68378	0.489369	-0.819852	-0.739698
Vulnerable	0.163388	0.753523	0.388307	-0.664398
Vulnerable	0.931215	0.259617	-0.373654	-0.154723
Vulnerable	0.890328	0.711849	-0.954551	0.0452029
Vulnerable	0.568703	-0.958628	0.0315328	1.05189
Vulnerable	1.16229	0.533591	-0.976294	0.00466335
Vulnerable	0.833816	1.28214	-0.236271	-1.14476
Vulnerable	0.646533	0.862531	0.649745	-1.38743
Vulnerable	-0.0820267	0.433635	-0.822482	1.24601
Vulnerable	0.881188	-0.273677	-0.266589	0.465938
Vulnerable	0.631497	0.626426	0.153766	-0.600258
Vulnerable	0.638107	-0.0894894	1.82039	-1.54665
Vulnerable	0.214282	0.898127	0.331497	-0.620513
Vulnerable	0.882576	1.75637	-0.819852	-0.959076
Vulnerable	1.06171	-0.469372	0.95722	-0.685457
Vulnerable	-0.458759	1.14229	0.888164	-0.706066
Vulnerable	0.655799	0.259617	-0.183164	0.13652
Vulnerable	-0.492144	-0.0894894	1.34421	0.109536
Vulnerable	0.271885	-0.0696534	0.388307	0.282142
Vulnerable	-0.67318	0.462384	1.32482	-0.227369
Vulnerable	-0.138368	0.417717	0.333237	0.293368
Vulnerable	0.602411	1.17343	-0.881343	0.0313608
Vulnerable	0.155602	0.626426	0.629945	-0.481959
Vulnerable	-0.180655	1.55	-0.485098	0.0601986
Vulnerable	0.27062	0.711849	0.275582	-0.287655
Vulnerable	-0.208121	0.702487	1.23285	-0.755185
Vulnerable	0.20848	-0.0894894	1.10612	-0.245361
Resilient	-0.545765	1.90472	-0.0774836	-0.265811
Vulnerable	-0.41996	1.45481	0.733121	-0.742049
Vulnerable	0.396753	0.732333	-0.993385	0.918661
Vulnerable	0.677174	0.702487	-0.721668	0.402142
Vulnerable	-0.306326	1.40839	0.50637	-0.540028
Vulnerable	0.0750652	0.352029	0.344366	0.300168
Vulnerable	0.597377	0.424253	-0.373654	0.427763
Vulnerable	0.228256	-1.12	-1.28358	3.26809
Vulnerable	0.348083	0.711849	0.946563	-0.897895
Vulnerable	0.0945659	0.525571	0.611072	-0.121226
Vulnerable	0.822488	0.741768	0.0854526	-0.532573
Vulnerable	1.1382	0.0265649	-0.548865	0.50513
Vulnerable	0.704275	0.890782	-0.721668	0.247832
Vulnerable	-0.872038	0.548305	0.50637	0.970726
Vulnerable	0.43038	0.251508	-0.457578	0.982372
Vulnerable	0.772523	0.146679	-0.268488	0.568974
Vulnerable	0.41221	1.52639	-0.457578	-0.247947
Vulnerable	0.139307	1.28214	0.649745	-0.821184
Vulnerable	0.979385	-1.38689	-1.01274	2.73327
Vulnerable	0.949158	-1.13792	1.73283	-0.22434
Vulnerable	0.769472	-0.17677	0.888819	-0.159767
Vulnerable	0.647453	0.424253	0.197817	0.0637094
Vulnerable	1.33756	0.0720202	1.133	-1.17347
Vulnerable	0.840568	0.762729	-0.51363	0.300168
Vulnerable	0.882576	-0.958628	1.94715	-0.447194
Vulnerable	0.396821	1.07234	-0.590677	0.553993
Vulnerable	0.980152	0.617973	0.696258	-0.84278
Vulnerable	0.350001	0.442921	0.118135	0.553993
Vulnerable	1.19645	0.489369	0.776494	-0.995639
Vulnerable	0.171291	0.514192	0.711644	0.0935214
Vulnerable	1.39736	-0.778377	-0.00399394	0.877348
Vulnerable	0.903783	0.504733	1.48693	-1.39818
Vulnerable	1.33001	0.236329	0.530959	-0.588968
Vulnerable	0.543179	0.732333	0.653543	-0.399418
Vulnerable	0.542243	0.548305	0.050637	0.404193
Vulnerable	0.86484	0.384967	0.696258	-0.391291
Vulnerable	1.02147	0.984384	0.153766	-0.600258
Vulnerable	1.05653	0.333284	0.354459	-0.16234
Vulnerable	0.530183	0.185954	-1.26738	2.1489
Vulnerable	0.698669	0.823512	-0.429113	0.50513
Vulnerable	-0.0269061	0.384967	0.564996	0.692284
Vulnerable	-0.478221	0.936263	-0.0666474	1.2425
Vulnerable	0.129777	1.45696	1.00248	-0.953371
Vulnerable	0.156582	-1.08916	1.12767	1.45678
Vulnerable	0.381214	0.652726	0.826948	-0.174042
Vulnerable	0.742849	1.18688	0.418268	-0.639068
Vulnerable	1.42034	0.729466	0.371921	-0.80676
Resilient	-1.66597	0.339293	2.34444	0.710919
Vulnerable	-0.61992	1.93924	1.48693	-1.05212
Vulnerable	0.525101	0.333284	1.26592	-0.351184
Vulnerable	0.769472	0.277782	1.00646	-0.279592
Vulnerable	0.972736	0.955026	0.290539	-0.435002
Vulnerable	0.0502121	0.925341	-1.201	2.03322
Vulnerable	1.00093	0.433635	1.61021	-1.21463
Vulnerable	0.716117	0.417717	0.333237	0.379653
Vulnerable	0.737252	0.447447	-0.322413	1.05593
Vulnerable	1.09133	0.862531	0.472542	-0.497613
Vulnerable	0.704478	-0.674722	1.4475	0.479372
Vulnerable	0.979891	0.741768	0.905797	-0.630144
Vulnerable	-0.0755619	0.30837	1.41503	0.357193
Vulnerable	0.141931	-0.292214	-1.02787	3.18706
Vulnerable	0.455819	-1.2055	0.637134	2.12481
Vulnerable	0.228367	0.711849	1.17022	-0.0657497
Vulnerable	0.750471	0.805405	0.0347214	0.464433
Vulnerable	0.959538	1.12122	0.596624	-0.603904
Vulnerable	0.902493	0.447447	-0.679547	1.41083
Vulnerable	1.4525	1.57537	0.350802	-1.28814
Vulnerable	0.00972624	1.14055	-0.149493	1.09849
Vulnerable	0.903277	0.384967	0.958781	-0.120397
Vulnerable	0.188426	1.24743	0.197817	0.573385
Vulnerable	1.30858	0.0505057	0.888819	-0.0399418
Vulnerable	1.04791	0.447447	0.868035	-0.127062
Vulnerable	0.288651	0.615762	0.880403	0.455092
Vulnerable	0.650073	1.64396	-0.0701621	0.0163662
Vulnerable	0.0540255	1.14229	0.648659	0.418616
Vulnerable	0.517163	0.337716	2.16954	-0.739141
Vulnerable	0.89559	0.151961	0.82752	0.42139
Vulnerable	0.717423	-0.0894894	-0.0843234	1.76572
Vulnerable	1.06575	0.741768	-0.427263	0.930987
Vulnerable	0.467053	-0.186493	-0.0590677	2.09096
Vulnerable	0.593482	1.93737	0.563648	-0.739698
Vulnerable	0.163972	-0.415629	1.30861	1.34439
Vulnerable	0.893981	0.514192	1.75405	-0.755185
Vulnerable	0.583367	0.914492	0.984595	-0.0465695
Vulnerable	0.398324	0.504733	0.888164	0.678158
Vulnerable	0.0483352	1.21337	-0.607006	1.81971
Vulnerable	0.848813	0.325896	1.49345	-0.137944
Vulnerable	0.749842	0.762729	1.07979	-0.0582415
Vulnerable	-0.546191	1.45481	-0.466531	2.10535
Vulnerable	1.07367	0.763327	0.658281	0.0894525
Vulnerable	0.97797	1.12122	-0.526889	1.01894
Vulnerable	1.18948	0.664123	-0.429113	1.19724
Vulnerable	1.01132	0.236329	1.55164	-0.167102
Vulnerable	0.638729	-0.606103	2.42178	0.230422
Vulnerable	0.70763	0.141841	0.371921	1.49227
Vulnerable	0.739278	0.433635	1.00204	0.542972
Vulnerable	1.4551	-0.0967598	1.72166	-0.351184
Vulnerable	0.149906	0.151961	2.14014	0.331092
Vulnerable	0.859385	0.548305	1.41784	-0.0364436
Vulnerable	0.44715	-0.234289	2.10272	0.500574
Vulnerable	0.560172	0.337716	1.94484	0.00466335
Vulnerable	0.506696	1.16214	1.73185	-0.511587
Vulnerable	0.55649	0.277782	0.30063	1.87726
Vulnerable	1.30185	0.528509	1.6236	-0.435002
Vulnerable	1.03137	0.0949819	0.959777	0.937439
Vulnerable	0.987999	-0.100828	0.333237	1.84649
Vulnerable	2.38353	0.664123	0.528907	-0.446524
Vulnerable	0.57973	1.58413	0.221795	0.837781
Vulnerable	0.587516	0.898127	0.0519212	1.70949
Vulnerable	1.0731	0.753523	0.197817	1.22868
Vulnerable	0.335971	0.101993	1.72614	1.12613
Vulnerable	1.53702	0.447447	0.629945	0.701031
Vulnerable	-0.126818	-0.0506949	0.581343	2.94826
Vulnerable	0.365607	0.862531	1.35856	0.796671
Vulnerable	0.929738	0.590566	1.33295	0.552222
Vulnerable	2.48942	0.729466	-0.0774836	0.275138
Vulnerable	1.17512	-0.0586715	1.81522	0.568974
Vulnerable	0.0354752	0.528509	1.00834	2.00426
Vulnerable	1.23384	0.850979	1.61509	-0.120397
Vulnerable	0.434525	0.936263	0.733121	1.50135
Vulnerable	0.775215	1.12122	-0.0774836	1.83037
Vulnerable	0.35028	0.528509	2.23886	0.540704
Vulnerable	1.01068	1.17343	1.57007	-0.0582415
Resilient	-1.38428	0.898127	2.12078	2.09783
Vulnerable	1.04755	0.702487	0.581343	1.40516
Vulnerable	0.319915	0.525571	0.163751	2.81902
Vulnerable	0.714221	0.588888	2.10272	0.427763
Vulnerable	0.240679	0.925341	1.72014	1.08656
Vulnerable	0.964599	0.259617	0.959777	1.81117
Vulnerable	1.41805	0.805405	2.29657	-0.481959
Vulnerable	-0.50623	0.702487	1.75405	2.33102
Vulnerable	1.30843	1.62766	2.13272	-0.742049
Vulnerable	0.547302	2.39988	-0.183164	1.59274
Vulnerable	1.33762	1.5948	0.495625	0.930987
Vulnerable	0.380383	1.08279	2.29321	0.719007
Vulnerable	0.061351	1.14229	2.44495	0.851186
Vulnerable	0.472779	0.617973	0.171211	3.40122
Vulnerable	1.328	0.797888	1.61021	0.982372
Vulnerable	1.20254	1.14055	0.304142	2.12302
Vulnerable	1.44429	1.34427	1.73185	0.367212
Vulnerable	0.443343	1.18688	0.888819	2.47639
Vulnerable	0.993351	1.07908	2.27526	0.710763
Vulnerable	1.87634	0.688438	2.68573	-0.167102
Vulnerable	0.518904	0.384967	1.09004	3.13033
Vulnerable	0.560172	1.51297	2.39424	0.68085
Vulnerable	0.763585	1.49195	2.42178	1.92917
Vulnerable	1.23775	2.11837	2.58569	2.00253

## Sheet: Panel F
sex	split	esc_z_score	pr_z_score	shock_z_score	addiction_index
F	Resilient	-2.1191	-2.44953	-2.16976	-2.24613
F	Resilient	-2.33394	-2.40047	-1.59918	-2.1112
F	Resilient	-2.964	-1.48362	-1.66618	-2.03793
M	Resilient	-3.19821	-1.74218	-1.07755	-2.00598
M	Resilient	-2.9806	-1.81693	-1.16465	-1.9874
M	Resilient	-2.17745	-1.93365	-1.24287	-1.78466
F	Resilient	-2.58987	-2.02421	-0.48972	-1.70127
F	Resilient	-2.20807	-1.46261	-1.38066	-1.68378
F	Resilient	-2.47921	-2.1781	-0.353836	-1.67038
F	Resilient	-1.85336	-1.81733	-1.14506	-1.60525
F	Resilient	-1.78181	-1.60407	-1.35015	-1.57868
F	Resilient	-1.90661	-1.7003	-1.03668	-1.54786
M	Resilient	-2.07808	-1.55706	-0.98227	-1.53914
F	Vulnerable	-0.946342	-2.47632	-1.17017	-1.53095
M	Resilient	-1.82295	-1.55137	-1.13561	-1.50331
F	Vulnerable	-1.31071	-2.1781	-1.01014	-1.49965
M	Resilient	-1.8896	-1.65513	-0.945084	-1.4966
F	Resilient	-1.93274	-1.99498	-0.522834	-1.48352
M	Resilient	-1.60833	-1.93365	-0.851969	-1.46465
M	Resilient	-1.4446	-1.49612	-1.37163	-1.43745
M	Resilient	-1.82514	-1.74535	-0.721668	-1.43072
M	Resilient	-1.84278	-1.23552	-1.12229	-1.40019
M	Resilient	-1.78035	-1.44532	-0.945084	-1.39025
M	Resilient	-1.82295	-1.38674	-0.945124	-1.38494
M	Resilient	-1.92815	-1.2055	-0.822482	-1.31871
F	Resilient	-1.78696	-1.3599	-0.782099	-1.30965
M	Resilient	-1.75618	-1.2221	-0.945124	-1.3078
F	Resilient	-1.42411	-1.7003	-0.798592	-1.30767
M	Resilient	-1.84278	-1.44532	-0.590677	-1.29293
F	Resilient	-1.81407	-1.34234	-0.679547	-1.27865
M	Resilient	-1.68941	-1.55137	-0.564144	-1.26831
M	Resilient	-1.4446	-1.08542	-1.24906	-1.25969
F	Resilient	-1.75319	-0.75104	-1.24761	-1.25061
F	Resilient	-1.26456	-1.56733	-0.908123	-1.24667
M	Resilient	-1.42759	-1.29077	-1.00391	-1.24076
M	Vulnerable	-0.872038	-1.81693	-1.01274	-1.2339
F	Resilient	-1.22061	-1.56733	-0.908123	-1.23202
F	Resilient	-1.13328	-1.7003	-0.798592	-1.21072
F	Resilient	-1.22732	-1.81733	-0.529806	-1.19149
M	Resilient	-1.75618	-1.05747	-0.754634	-1.18943
M	Resilient	-1.89907	-1.2055	-0.457578	-1.18739
M	Resilient	-1.35703	-1.4917	-0.708268	-1.18567
M	Resilient	-1.56233	-0.958628	-1.0327	-1.18455
F	Resilient	-0.987868	-1.16336	-1.39382	-1.18168
F	Vulnerable	-1.50297	-0.751432	-1.28524	-1.17988
M	Resilient	-1.38061	-0.958628	-1.13912	-1.15945
F	Resilient	-1.9334	-0.780064	-0.747621	-1.15369
M	Resilient	-1.01272	-1.22928	-1.201	-1.14767
F	Resilient	-1.94583	-0.929772	-0.548865	-1.14149
F	Vulnerable	-0.757534	-1.52349	-1.1223	-1.13444
M	Resilient	-1.56233	-0.777628	-1.0327	-1.12422
F	Vulnerable	-0.614161	-1.48362	-1.2663	-1.12136
M	Vulnerable	-0.452039	-2.03196	-0.860828	-1.11494
M	Vulnerable	-0.521417	-1.91996	-0.832651	-1.09134
M	Resilient	-1.04344	-1.22928	-0.976294	-1.08301
M	Resilient	-1.04344	-1.22928	-0.976294	-1.08301
F	Vulnerable	-1.15054	-0.544516	-1.54853	-1.08119
M	Resilient	-1.68103	-0.841252	-0.700847	-1.07438
F	Resilient	-2.02512	-0.033264	-1.1223	-1.06023
F	Vulnerable	-0.682132	-0.792222	-1.66618	-1.04685
F	Resilient	-1.09496	-1.81733	-0.222177	-1.04482
F	Resilient	-2.14484	-0.033264	-0.954551	-1.04422
F	Resilient	-1.93118	-1.24855	0.0498968	-1.04328
F	Resilient	-0.984611	-1.3599	-0.782099	-1.0422
M	Resilient	-1.22467	-1.30524	-0.572773	-1.03422
M	Resilient	-1.53755	-0.596628	-0.926275	-1.02015
F	Resilient	-1.59857	-0.29029	-1.16214	-1.017
M	Resilient	-1.04344	-1.22928	-0.751591	-1.0081
M	Resilient	-1.31675	-1.11877	-0.572773	-1.00276
M	Resilient	-1.01886	-1.22928	-0.751591	-0.999912
F	Vulnerable	-0.683731	-1.3599	-0.934704	-0.992779
M	Vulnerable	-0.432191	-1.91996	-0.587754	-0.979966
M	Resilient	-0.779704	-1.38674	-0.754634	-0.973691
M	Resilient	-1.47147	-0.777628	-0.607006	-0.952034
F	Vulnerable	-0.487931	-1.48362	-0.866416	-0.945987
M	Resilient	-1.04958	-1.22928	-0.526889	-0.935251
M	Resilient	-1.16639	-0.840494	-0.780399	-0.929094
M	Resilient	-1.16639	-0.840494	-0.780399	-0.929094
M	Resilient	-1.38581	-1.4917	0.104701	-0.924269
F	Vulnerable	-0.467714	-1.3599	-0.934704	-0.920773
M	Vulnerable	-0.539922	-1.2055	-0.944116	-0.896515
F	Resilient	-1.46293	-1.19423	-0.0190756	-0.892079
M	Resilient	-1.1572	-0.840494	-0.676647	-0.891448
M	Resilient	-0.860243	-0.777628	-1.0327	-0.89019
F	Vulnerable	-1.56171	-1.78601	0.689388	-0.88611
M	Resilient	-1.45027	-1.29077	0.099224	-0.880606
F	Resilient	-1.93354	-0.365862	-0.324285	-0.874562
M	Resilient	-1.2522	-1.02338	-0.335943	-0.870509
M	Resilient	-1.31675	-1.11877	-0.166289	-0.86727
M	Resilient	-1.4446	-1.49612	0.344366	-0.865452
M	Resilient	-1.00657	-0.837535	-0.751591	-0.865233
F	Vulnerable	-0.0558569	-1.24855	-1.26738	-0.857263
M	Resilient	-0.945131	-0.837535	-0.751591	-0.844752
F	Resilient	-1.04735	-0.447447	-1.03668	-0.843828
F	Vulnerable	0.249493	-1.70977	-1.06638	-0.842219
M	Vulnerable	-0.443344	-0.67554	-1.32245	-0.813777
F	Vulnerable	-0.708239	-1.70977	-0.00399394	-0.807334
F	Resilient	-1.71752	-1.3599	0.667646	-0.80326
F	Vulnerable	-0.856913	-1.48362	-0.0666474	-0.802392
M	Resilient	-1.01886	-1.03341	-0.302186	-0.784819
M	Resilient	-1.38249	-0.615581	-0.330764	-0.776279
F	Vulnerable	-0.724078	-0.29029	-1.2714	-0.761923
M	Vulnerable	-0.118368	-1.2055	-0.944116	-0.755996
M	Resilient	-1.13884	-0.641201	-0.469142	-0.749726
M	Vulnerable	-1.19062	-0.67554	-0.342856	-0.736337
M	Resilient	-1.17557	-0.441909	-0.572894	-0.730125
F	Vulnerable	0.228256	-1.12	-1.28358	-0.725107
F	Vulnerable	-0.414806	-1.40794	-0.30936	-0.710702
M	Resilient	-1.51503	-0.186493	-0.413474	-0.704999
M	Vulnerable	-0.350214	-0.880072	-0.881343	-0.703876
M	Resilient	-1.41365	-0.596628	-0.0748903	-0.695056
F	Vulnerable	-0.876431	-1.16526	-0.0346426	-0.692112
F	Vulnerable	-0.555011	-0.404046	-1.11102	-0.690027
M	Vulnerable	-0.67075	-0.659125	-0.700847	-0.676907
M	Vulnerable	-0.180147	-1.02338	-0.822482	-0.675336
M	Vulnerable	-0.932038	-0.526803	-0.557007	-0.671949
F	Vulnerable	-1.17398	-1.12	0.304142	-0.663277
M	Resilient	-1.02899	-0.372925	-0.572773	-0.65823
F	Resilient	-1.05919	-0.964298	0.0854526	-0.646011
F	Vulnerable	-0.641535	-0.17677	-1.11102	-0.643109
F	Vulnerable	0.0807184	-0.0810456	-1.92898	-0.643101
M	Vulnerable	0.379065	-1.55706	-0.721668	-0.633221
F	Vulnerable	-1.16487	0.0102752	-0.716537	-0.623711
M	Resilient	-0.716364	-0.441909	-0.676647	-0.61164
M	Vulnerable	-0.315096	-0.777628	-0.713429	-0.602051
F	Vulnerable	-0.75389	-0.524755	-0.506574	-0.595073
M	Resilient	-0.780653	-0.840494	-0.157884	-0.59301
M	Vulnerable	0.338653	-1.55137	-0.564144	-0.592287
M	Resilient	-0.98814	-0.445785	-0.302186	-0.578704
M	Resilient	-0.608866	-1.4917	0.37569	-0.574958
F	Vulnerable	-0.954714	-1.52349	0.778818	-0.566462
F	Vulnerable	-0.74184	-1.24608	0.302473	-0.561815
F	Vulnerable	0.832787	-1.46261	-1.05288	-0.560902
M	Vulnerable	-0.305492	-0.606103	-0.76788	-0.559825
M	Resilient	-0.477576	-0.840494	-0.261637	-0.526569
M	Resilient	-0.718214	-0.559387	-0.301784	-0.526462
M	Resilient	-0.753101	-0.641201	-0.157884	-0.517395
M	Resilient	-0.697996	-0.441909	-0.365389	-0.501765
F	Vulnerable	-0.584679	-0.447447	-0.441458	-0.491195
F	Vulnerable	-0.159119	-0.531535	-0.782099	-0.490918
M	Vulnerable	0.979385	-1.38689	-1.01274	-0.473415
M	Resilient	-0.888202	0.424253	-0.945124	-0.469691
M	Resilient	-0.569418	-0.242617	-0.572894	-0.461643
F	Vulnerable	-0.495387	0.504733	-1.38713	-0.459262
M	Vulnerable	0.982082	-1.23552	-1.12229	-0.458574
M	Resilient	0.183683	-0.840494	-0.676647	-0.444486
F	Vulnerable	-0.39283	-0.610993	-0.30936	-0.437728
M	Resilient	-0.85297	-1.03341	0.596624	-0.429918
F	Vulnerable	0.0491823	-0.697209	-0.629494	-0.42584
M	Vulnerable	0.208362	-0.745849	-0.708268	-0.415252
F	Vulnerable	0.141931	-0.292214	-1.02787	-0.392719
M	Resilient	-0.480292	0.12737	-0.819852	-0.390925
M	Resilient	-1.31994	-1.02571	1.18135	-0.388101
M	Vulnerable	-0.623468	0.333284	-0.860828	-0.383671
M	Vulnerable	0.193931	-1.44532	0.118135	-0.377752
F	Vulnerable	-0.636758	0.688438	-1.17017	-0.372831
F	Vulnerable	0.36921	-0.964655	-0.50723	-0.367559
M	Resilient	-1.06928	0	-0.0307943	-0.36669
M	Vulnerable	0.00278833	-0.142219	-0.9551	-0.364844
F	Resilient	-1.51827	1.31699	-0.878883	-0.360055
F	Vulnerable	0.219093	-0.547058	-0.747621	-0.358529
M	Vulnerable	-0.0245665	-0.606103	-0.413474	-0.348048
M	Resilient	-0.791529	-0.837535	0.596624	-0.344146
F	Vulnerable	0.410065	0.277782	-1.69921	-0.337122
F	Vulnerable	0.483076	-0.619374	-0.866416	-0.334238
F	Vulnerable	-0.524003	0.903896	-1.28524	-0.301783
F	Vulnerable	-0.808363	0.590566	-0.666474	-0.294757
F	Vulnerable	0.729054	-0.441833	-1.17017	-0.294317
M	Vulnerable	-0.321099	0.442921	-0.945084	-0.27442
F	Vulnerable	0.192187	0.151961	-1.14141	-0.265753
F	Vulnerable	1.60863	-1.33721	-1.01047	-0.24635
M	Vulnerable	-0.248147	0.146679	-0.636201	-0.24589
F	Vulnerable	-1.31329	0.244869	0.333237	-0.24506
M	Vulnerable	-0.340611	0.333284	-0.708918	-0.238748
F	Vulnerable	1.01297	-0.751432	-0.956137	-0.231533
F	Vulnerable	-0.651901	1.08441	-1.1223	-0.229931
M	Vulnerable	-0.0195183	0.568876	-1.2	-0.21688
F	Vulnerable	0.673788	-1.46261	0.148992	-0.213278
M	Vulnerable	-0.325558	-0.23899	-0.0701621	-0.21157
F	Vulnerable	0.0169926	0.417717	-1.06636	-0.210549
M	Vulnerable	-0.108601	-0.958628	0.457225	-0.203335
M	Vulnerable	0.162258	-0.427286	-0.330764	-0.198597
M	Resilient	-1.28583	-0.264022	0.95722	-0.197543
F	Vulnerable	-0.217909	-0.215779	-0.149493	-0.194394
F	Vulnerable	0.146307	-0.667888	-0.0360846	-0.185888
F	Vulnerable	0.530183	0.185954	-1.26738	-0.183748
F	Vulnerable	-0.107618	0.315251	-0.734892	-0.175753
F	Vulnerable	-0.118948	0.0720202	-0.466531	-0.171153
F	Vulnerable	-0.472506	-0.111265	0.0854526	-0.166106
M	Vulnerable	0.333896	-0.23899	-0.591366	-0.165487
M	Vulnerable	0.739259	0.0949819	-1.3261	-0.163955
M	Vulnerable	-0.614896	0.548305	-0.405096	-0.157229
M	Vulnerable	-0.0820267	0.433635	-0.822482	-0.156958
F	Vulnerable	-0.0462769	0.339293	-0.73089	-0.145958
F	Vulnerable	0.749528	-1.47908	0.302473	-0.142361
M	Vulnerable	0.789837	-0.641201	-0.572894	-0.141419
M	Resilient	-0.152543	-0.64166	0.371921	-0.14076
F	Vulnerable	0.450446	-0.537782	-0.32472	-0.137352
F	Vulnerable	1.08009	-0.0810456	-1.40393	-0.134962
M	Vulnerable	0.189359	0.137601	-0.721668	-0.131569
F	Vulnerable	-0.479661	0.528509	-0.427263	-0.126138
M	Vulnerable	0.568703	-0.958628	0.0315328	-0.119464
F	Resilient	-1.63323	0.505057	0.771181	-0.118998
M	Resilient	-0.275525	-0.641201	0.568383	-0.116114
M	Vulnerable	0.0808615	-0.319993	-0.097959	-0.112363
M	Vulnerable	-0.17468	0.670369	-0.819852	-0.108054
F	Vulnerable	-0.272542	0.462384	-0.48972	-0.0999592
F	Vulnerable	-0.602321	0.69698	-0.363748	-0.089696
F	Vulnerable	1.32624	-0.958348	-0.627032	-0.0863802
F	Vulnerable	0.334063	0.0894894	-0.679547	-0.0853316
M	Vulnerable	0.0502121	0.925341	-1.201	-0.0751478
M	Vulnerable	-0.246326	1.19337	-1.16465	-0.0725352
F	Vulnerable	0.291746	0.525571	-1.01047	-0.064383
M	Vulnerable	-0.0452607	0.424253	-0.564144	-0.0617173
M	Vulnerable	0.740174	0.0233116	-0.945084	-0.0605325
F	Vulnerable	-1.17991	-1.78601	2.79566	-0.0567535
F	Vulnerable	0.403592	-0.0810456	-0.485098	-0.0541838
F	Vulnerable	1.81989	-1.33721	-0.61906	-0.0454602
F	Vulnerable	-0.222331	0.153014	-0.059909	-0.0430751
M	Vulnerable	0.455819	-1.2055	0.637134	-0.0375174
F	Vulnerable	1.12394	-1.13792	-0.0666474	-0.0268756
M	Vulnerable	0.5851	-0.0967598	-0.557007	-0.0228887
F	Vulnerable	-0.254196	0.984384	-0.798592	-0.0228015
F	Vulnerable	0.496589	-1.31315	0.771181	-0.0151265
M	Vulnerable	0.622972	0.325896	-0.98227	-0.0111338
F	Vulnerable	-0.428553	0.277782	0.182992	0.0107403
F	Vulnerable	-0.272542	-0.215779	0.530959	0.0142129
F	Vulnerable	0.396753	0.732333	-0.993385	0.0452337
F	Vulnerable	0.288343	0.793852	-0.934704	0.0491637
F	Vulnerable	1.06755	-0.365862	-0.553192	0.0494971
M	Vulnerable	0.993351	0.137601	-0.98227	0.0495605
M	Vulnerable	0.0152959	-0.415629	0.563648	0.0544384
F	Vulnerable	0.222512	0.0265649	-0.0698556	0.0597404
M	Vulnerable	-0.872038	0.548305	0.50637	0.0608789
F	Vulnerable	0.10078	0.462384	-0.376311	0.0622844
M	Vulnerable	0.123941	0.141841	-0.0774836	0.062766
F	Vulnerable	0.156582	-1.08916	1.12767	0.0650299
F	Vulnerable	0.428982	0.315251	-0.529806	0.0714756
M	Vulnerable	0.467053	-0.186493	-0.0590677	0.0738306
M	Vulnerable	0.43038	0.251508	-0.457578	0.0747702
M	Vulnerable	0.872794	-0.0696534	-0.564144	0.0796655
F	Vulnerable	0.311488	0.296831	-0.324285	0.0946781
F	Vulnerable	0.316041	-0.055825	0.0397313	0.0999823
M	Vulnerable	0.230051	-0.596628	0.670071	0.101165
M	Vulnerable	0.6926	-0.415629	0.0315328	0.102835
M	Vulnerable	1.0211	0.233116	-0.945084	0.103044
F	Vulnerable	-0.211405	0.617973	-0.0913125	0.105085
F	Vulnerable	-0.445544	1.3666	-0.603129	0.105976
F	Vulnerable	0.881188	-0.273677	-0.266589	0.113641
F	Vulnerable	-0.214538	-0.268468	0.868035	0.128343
F	Vulnerable	0.0734395	0.153014	0.163751	0.130068
F	Vulnerable	-0.478221	0.936263	-0.0666474	0.130465
M	Vulnerable	-0.126818	-0.0506949	0.581343	0.13461
F	Vulnerable	-0.0705079	0.664123	-0.189608	0.134669
M	Vulnerable	0.33653	0.333284	-0.253185	0.138876
F	Vulnerable	-0.127832	0.17864	0.367515	0.139441
M	Vulnerable	0.339528	0.797888	-0.700847	0.145523
F	Vulnerable	-0.306705	-0.055825	0.804559	0.147343
F	Vulnerable	-0.546191	1.45481	-0.466531	0.147362
M	Vulnerable	0.474155	0.729466	-0.751591	0.150676
M	Vulnerable	0.839286	0.568876	-0.9551	0.151021
M	Vulnerable	0.0250949	0.568876	-0.097959	0.165337
F	Vulnerable	0.687038	0.64757	-0.834357	0.16675
M	Vulnerable	0.758678	-0.596628	0.350802	0.170951
F	Vulnerable	0.717423	-0.0894894	-0.0843234	0.181203
M	Vulnerable	0.703303	0.559387	-0.708268	0.184807
M	Vulnerable	0.216825	0.762729	-0.391059	0.196165
M	Vulnerable	0.271885	-0.0696534	0.388307	0.196846
F	Vulnerable	0.628894	0.688438	-0.716537	0.200265
F	Vulnerable	-0.138368	0.417717	0.333237	0.204195
F	Vulnerable	1.39736	-0.778377	-0.00399394	0.204997
F	Vulnerable	1.1382	0.0265649	-0.548865	0.2053
F	Vulnerable	0.481215	0.628178	-0.47689	0.210835
F	Vulnerable	0.546946	-0.215779	0.304142	0.211769
F	Vulnerable	0.890328	0.711849	-0.954551	0.215876
M	Vulnerable	0.597377	0.424253	-0.373654	0.215992
F	Vulnerable	-0.342092	1.08398	-0.0913125	0.21686
M	Vulnerable	0.772523	0.146679	-0.268488	0.216904
M	Vulnerable	0.0483352	1.21337	-0.607006	0.218233
M	Vulnerable	0.677174	0.702487	-0.721668	0.219331
F	Vulnerable	0.902493	0.447447	-0.679547	0.223464
F	Vulnerable	0.901189	0.528509	-0.734892	0.231602
F	Vulnerable	-0.0483321	0.17864	0.586037	0.238782
M	Vulnerable	1.16229	0.533591	-0.976294	0.239863
M	Resilient	0.0459208	1.35172	-0.676647	0.240332
M	Vulnerable	-0.342964	0.924423	0.146938	0.242799
M	Vulnerable	0.655799	0.259617	-0.183164	0.244084
M	Vulnerable	-0.0864381	0.924423	-0.097959	0.246675
F	Vulnerable	-0.706875	1.62222	-0.17168	0.247888
F	Vulnerable	-0.492144	-0.0894894	1.34421	0.254193
M	Vulnerable	0.0750652	0.352029	0.344366	0.257153
M	Vulnerable	0.535664	0.851369	-0.607006	0.260009
M	Vulnerable	0.755099	0.745849	-0.708268	0.264227
M	Vulnerable	0.931215	0.259617	-0.373654	0.272393
M	Vulnerable	1.01635	1.17343	-1.37163	0.272718
M	Vulnerable	0.906446	0.615762	-0.700847	0.273787
F	Vulnerable	0.737252	0.447447	-0.322413	0.287429
M	Vulnerable	0.704275	0.890782	-0.721668	0.29113
M	Vulnerable	0.396821	1.07234	-0.590677	0.292827
F	Vulnerable	-0.180655	1.55	-0.485098	0.294748
M	Vulnerable	0.602411	1.17343	-0.881343	0.298166
F	Vulnerable	0.527504	0.462505	-0.0953779	0.29821
M	Vulnerable	0.198392	0.514192	0.19044	0.301008
M	Vulnerable	0.350001	0.442921	0.118135	0.303686
F	Vulnerable	-0.0269061	0.384967	0.564996	0.307686
F	Vulnerable	1.02276	-0.130684	0.0311784	0.307752
M	Vulnerable	0.651507	0.745849	-0.437279	0.320026
M	Vulnerable	-0.00353098	0.588888	0.388307	0.324555
F	Vulnerable	0.74865	-0.130684	0.360283	0.326083
M	Vulnerable	0.772366	0.924423	-0.710203	0.328862
F	Vulnerable	0.672022	1.27068	-0.954551	0.329385
M	Vulnerable	0.29054	0.968079	-0.268488	0.330044
M	Vulnerable	0.794673	-0.67554	0.881631	0.333588
F	Vulnerable	0.00972624	1.14055	-0.149493	0.333593
F	Vulnerable	0.319915	0.525571	0.163751	0.336412
M	Vulnerable	0.519139	0.932312	-0.437279	0.338057
F	Vulnerable	0.436687	0.277782	0.30063	0.338366
F	Resilient	-1.66597	0.339293	2.34444	0.339254
M	Vulnerable	0.632006	0.325896	0.060139	0.339347
F	Vulnerable	-0.240977	2.41621	-1.15573	0.339837
M	Vulnerable	0.582445	0.745849	-0.301784	0.34217
M	Vulnerable	-0.242584	0.391102	0.881631	0.343383
F	Vulnerable	0.0731647	0.0762322	0.886851	0.345416
F	Vulnerable	0.693663	0.413105	-0.0695298	0.345746
M	Vulnerable	0.163972	-0.415629	1.30861	0.352318
F	Vulnerable	0.991689	0.0265649	0.0498968	0.35605
M	Vulnerable	0.840568	0.762729	-0.51363	0.363222
F	Vulnerable	0.698669	0.823512	-0.429113	0.364356
F	Vulnerable	-0.67318	0.462384	1.32482	0.371342
M	Vulnerable	0.638729	1.07234	-0.590677	0.373463
M	Vulnerable	0.628486	0.932312	-0.437279	0.374506
F	Vulnerable	0.55649	0.277782	0.30063	0.3783
M	Vulnerable	0.542243	0.548305	0.050637	0.380395
F	Vulnerable	0.987999	-0.100828	0.333237	0.406802
M	Vulnerable	0.70763	0.141841	0.371921	0.407131
M	Vulnerable	1.18673	0.745849	-0.708268	0.408105
F	Vulnerable	0.20848	-0.0894894	1.10612	0.408371
M	Vulnerable	0.740409	1.07908	-0.591366	0.409374
F	Vulnerable	0.0945659	0.525571	0.611072	0.410403
M	Vulnerable	1.06012	0.233116	-0.0590677	0.411389
F	Vulnerable	0.27062	0.711849	0.275582	0.41935
F	Vulnerable	0.472779	0.617973	0.171211	0.420654
M	Vulnerable	0.647453	0.424253	0.197817	0.423174
F	Vulnerable	0.103186	1.95357	-0.782099	0.424884
M	Resilient	-0.545765	1.90472	-0.0774836	0.427156
M	Vulnerable	0.163388	0.753523	0.388307	0.435073
F	Vulnerable	0.99596	-0.964655	1.28205	0.437786
F	Vulnerable	1.12155	0.296831	-0.0953779	0.441001
M	Vulnerable	0.499428	1.16214	-0.335943	0.441875
M	Vulnerable	1.68378	0.489369	-0.819852	0.451098
F	Vulnerable	0.259744	0.763414	0.333237	0.452132
F	Vulnerable	1.06575	0.741768	-0.427263	0.460084
F	Vulnerable	-0.0638903	0.69698	0.755209	0.462766
M	Vulnerable	0.171291	0.514192	0.711644	0.465709
F	Vulnerable	0.601805	0.903896	-0.100464	0.468413
F	Vulnerable	0.406013	0.903896	0.0969994	0.468969
F	Vulnerable	0.631497	0.626426	0.153766	0.470563
F	Vulnerable	0.155602	0.626426	0.629945	0.470658
F	Vulnerable	-0.00745277	0.315251	1.11088	0.472894
F	Vulnerable	1.18948	0.664123	-0.429113	0.474829
F	Vulnerable	0.214282	0.898127	0.331497	0.481302
F	Vulnerable	0.601805	0.69698	0.16282	0.487202
M	Vulnerable	0.131503	0.862531	0.472542	0.488859
F	Vulnerable	0.716117	0.417717	0.333237	0.489024
M	Vulnerable	0.704478	-0.674722	1.4475	0.49242
M	Vulnerable	1.49176	0.559387	-0.572773	0.49279
M	Vulnerable	0.41221	1.52639	-0.457578	0.493676
F	Vulnerable	0.769472	-0.17677	0.888819	0.49384
F	Vulnerable	0.936393	0.959525	-0.400587	0.498443
F	Vulnerable	1.32624	0.69698	-0.49539	0.509276
F	Vulnerable	0.812955	0.131158	0.591343	0.511819
F	Vulnerable	0.587516	0.898127	0.0519212	0.512522
F	Vulnerable	0.949158	-1.13792	1.73283	0.51469
M	Vulnerable	1.06171	-0.469372	0.95722	0.51652
F	Vulnerable	1.07791	0.882035	-0.397313	0.520877
F	Vulnerable	0.627798	-0.0345153	0.972855	0.522046
F	Vulnerable	-0.458759	1.14229	0.888164	0.523899
M	Vulnerable	0.97797	1.12122	-0.526889	0.524099
F	Vulnerable	0.0354752	0.528509	1.00834	0.524108
F	Vulnerable	0.750471	0.805405	0.0347214	0.530199
M	Vulnerable	-0.306326	1.40839	0.50637	0.536145
M	Vulnerable	0.188426	1.24743	0.197817	0.544557
F	Resilient	-1.38428	0.898127	2.12078	0.544874
M	Vulnerable	-0.0755619	0.30837	1.41503	0.54928
F	Vulnerable	0.822488	0.741768	0.0854526	0.549903
F	Vulnerable	0.436687	0.732333	0.535905	0.568309
F	Vulnerable	0.00466758	1.1165	0.586037	0.569068
M	Vulnerable	-0.208121	0.702487	1.23285	0.575738
M	Vulnerable	1.05653	0.333284	0.354459	0.581423
F	Vulnerable	-0.41996	1.45481	0.733121	0.589323
F	Vulnerable	-0.847062	1.73156	0.886851	0.59045
M	Vulnerable	0.288651	0.615762	0.880403	0.594938
F	Vulnerable	0.398324	0.504733	0.888164	0.597074
F	Vulnerable	0.905662	0.413105	0.476776	0.598514
M	Vulnerable	0.775215	1.12122	-0.0774836	0.606316
M	Vulnerable	0.882576	1.75637	-0.819852	0.606364
F	Vulnerable	0.0540255	1.14229	0.648659	0.614992
M	Vulnerable	0.381214	0.652726	0.826948	0.620296
M	Vulnerable	0.882576	-0.958628	1.94715	0.623699
F	Vulnerable	0.89559	0.151961	0.82752	0.625023
M	Vulnerable	0.833816	1.28214	-0.236271	0.626562
F	Vulnerable	1.18918	0.69698	0.0311784	0.639114
F	Vulnerable	0.543179	0.732333	0.653543	0.643018
F	Vulnerable	0.86484	0.384967	0.696258	0.648688
M	Vulnerable	-0.50623	0.702487	1.75405	0.650103
F	Vulnerable	0.518904	0.384967	1.09004	0.664638
F	Vulnerable	0.348083	0.711849	0.946563	0.668832
M	Vulnerable	1.0731	0.753523	0.197817	0.674812
F	Vulnerable	0.769472	0.277782	1.00646	0.68457
M	Vulnerable	0.139307	1.28214	0.649745	0.690397
M	Vulnerable	1.03137	0.0949819	0.959777	0.695375
F	Vulnerable	1.33001	0.236329	0.530959	0.6991
F	Vulnerable	0.434525	0.936263	0.733121	0.701303
F	Vulnerable	0.228367	0.711849	1.17022	0.70348
F	Vulnerable	1.40253	1.1165	-0.397313	0.70724
M	Vulnerable	0.525101	0.333284	1.26592	0.708103
M	Vulnerable	1.49407	0.729466	-0.0774836	0.715352
M	Vulnerable	0.646533	0.862531	0.649745	0.719603
F	Vulnerable	1.02147	0.984384	0.153766	0.719872
F	Vulnerable	0.335971	0.101993	1.72614	0.721369
M	Vulnerable	0.739278	0.433635	1.00204	0.724984
M	Vulnerable	0.964599	0.259617	0.959777	0.727998
M	Vulnerable	0.238788	0.554553	1.3984	0.730581
F	Vulnerable	0.972736	0.955026	0.290539	0.739434
M	Vulnerable	0.650073	1.64396	-0.0701621	0.741292
F	Vulnerable	0.903277	0.384967	0.958781	0.749008
F	Vulnerable	1.30858	0.0505057	0.888819	0.749303
F	Vulnerable	0.620789	0.413105	1.2416	0.758499
F	Vulnerable	0.980152	0.617973	0.696258	0.764794
M	Vulnerable	0.460074	1.45774	0.391836	0.769884
M	Vulnerable	0.44715	-0.234289	2.10272	0.77186
M	Vulnerable	1.04755	0.702487	0.581343	0.777128
F	Vulnerable	0.742849	1.18688	0.418268	0.782667
F	Vulnerable	1.04791	0.447447	0.868035	0.787796
F	Vulnerable	0.638107	-0.0894894	1.82039	0.78967
M	Vulnerable	0.57973	1.58413	0.221795	0.795218
F	Vulnerable	0.508164	0.64757	1.2416	0.799112
F	Vulnerable	0.866959	0.793852	0.743948	0.801586
M	Vulnerable	1.09133	0.862531	0.472542	0.808801
F	Vulnerable	0.149906	0.151961	2.14014	0.814001
M	Vulnerable	0.638729	-0.606103	2.42178	0.818134
M	Vulnerable	1.19645	0.489369	0.776494	0.820771
F	Vulnerable	0.583367	0.914492	0.984595	0.827485
M	Vulnerable	1.07367	0.763327	0.658281	0.831759
M	Vulnerable	1.44191	1.75031	-0.676647	0.838524
F	Vulnerable	0.443343	1.18688	0.888819	0.839682
M	Vulnerable	1.42034	0.729466	0.371921	0.840577
F	Vulnerable	-0.00195737	0.413105	2.11569	0.84228
F	Vulnerable	1.33756	0.0720202	1.133	0.847529
M	Vulnerable	0.365607	0.862531	1.35856	0.862232
F	Vulnerable	0.129777	1.45696	1.00248	0.863072
M	Vulnerable	0.749842	0.762729	1.07979	0.86412
M	Vulnerable	1.3317	1.75031	-0.469142	0.870956
F	Vulnerable	1.53702	0.447447	0.629945	0.871471
F	Vulnerable	0.979891	0.741768	0.905797	0.875819
F	Vulnerable	1.22956	0.131158	1.27806	0.879593
F	Vulnerable	1.20254	1.14055	0.304142	0.882408
M	Vulnerable	0.848813	0.325896	1.49345	0.889387
M	Vulnerable	0.959538	1.12122	0.596624	0.892459
M	Vulnerable	-0.0195183	0.746649	1.98367	0.9036
M	Vulnerable	1.36349	-0.142219	1.49387	0.905049
M	Vulnerable	1.17557	0.155968	1.3984	0.909981
M	Vulnerable	0.688812	0.753845	1.29465	0.912436
M	Vulnerable	0.524894	1.30524	0.917669	0.915933
M	Vulnerable	0.547302	2.39988	-0.183164	0.921338
M	Vulnerable	1.37464	0.391102	1.00408	0.923275
F	Vulnerable	1.01132	0.236329	1.55164	0.933097
F	Vulnerable	-0.61992	1.93924	1.48693	0.935415
M	Vulnerable	0.859385	0.548305	1.41784	0.941842
M	Vulnerable	0.560172	0.337716	1.94484	0.947576
F	Vulnerable	0.929738	0.590566	1.33295	0.951084
M	Vulnerable	0.240679	0.925341	1.72014	0.962052
F	Vulnerable	0.903783	0.504733	1.48693	0.965147
M	Vulnerable	1.17512	-0.0586715	1.81522	0.977222
F	Vulnerable	0.0311674	1.58543	1.35086	0.989154
M	Vulnerable	0.285101	0.548305	2.17739	1.0036
M	Vulnerable	0.78352	0.746649	1.49387	1.00801
M	Vulnerable	0.517163	0.337716	2.16954	1.00814
M	Vulnerable	1.00093	0.433635	1.61021	1.01493
M	Vulnerable	1.4551	-0.0967598	1.72166	1.02666
M	Vulnerable	0.593482	1.93737	0.563648	1.0315
F	Vulnerable	0.35028	0.528509	2.23886	1.03922
M	Vulnerable	2.48942	0.729466	-0.0774836	1.04713
M	Vulnerable	0.893981	0.514192	1.75405	1.05408
M	Vulnerable	1.75417	1.9496	-0.365389	1.11279
M	Vulnerable	1.4525	1.57537	0.350802	1.12622
M	Vulnerable	0.506696	1.16214	1.73185	1.13356
M	Vulnerable	0.714221	0.588888	2.10272	1.13528
F	Vulnerable	1.33762	1.5948	0.495625	1.14268
F	Vulnerable	1.30185	0.528509	1.6236	1.15132
F	Vulnerable	2.38353	0.664123	0.528907	1.19219
F	Vulnerable	0.061351	1.14229	2.44495	1.2162
F	Vulnerable	1.23384	0.850979	1.61509	1.2333
M	Vulnerable	1.29497	-0.641201	3.05844	1.2374
F	Vulnerable	1.19098	0.959525	1.58327	1.24459
M	Vulnerable	1.328	0.797888	1.61021	1.24537
M	Vulnerable	1.01068	1.17343	1.57007	1.25139
M	Vulnerable	0.380383	1.08279	2.29321	1.25213
M	Vulnerable	1.12965	1.55101	1.1909	1.29052
M	Vulnerable	0.5882	0.745849	2.54361	1.29255
M	Vulnerable	1.09465	1.4917	1.32415	1.3035
M	Vulnerable	1.09177	0.186462	2.6791	1.31911
M	Vulnerable	0.993351	1.07908	2.27526	1.44923
F	Vulnerable	0.288343	0.959525	3.18562	1.47783
M	Vulnerable	0.560172	1.51297	2.39424	1.48913
F	Vulnerable	1.41805	0.805405	2.29657	1.50667
M	Vulnerable	1.44429	1.34427	1.73185	1.5068
M	Vulnerable	0.763585	1.49195	2.42178	1.5591
F	Vulnerable	1.30843	1.62766	2.13272	1.6896
F	Vulnerable	1.87634	0.688438	2.68573	1.75017
M	Vulnerable	1.23775	2.11837	2.58569	1.9806
